# Supplementary material for: Proteins with Altered Levels in Plasma from Glioblastoma Patients as Revealed by iTRAQ-Based Quantitative Proteomic Analysis
Source: PLoS One. 2012 Sep 28;7(9):e46153. doi: 10.1371/journal.pone.0046153 (PMC3461020; doi:10.1371/journal.pone.0046153)
Supplement: Table S1 — List of all plasma proteins (n = 296) identified in the study along with peptides, molecular function, biological process and localizations. (XLS) [file pone.0046153.s003.xls]

## Sheet: Table S1
Table S1 List of all plasma proteins (n=296) identified in the study along with peptides, molecular function, biological process and localizations
Accession	Gene Symbol	Entrez Gene ID	Protein	AAs	MW [kDa]	ΣCoverage	PSMs	Unique Peptides	Fold change	Variability [%]	Signal sequence	TM domain	Localization	Molecular Function	Biological Process	Protein Accessions	Sequence	# Proteins	# Protein Groups	Activation Type	Modifications	Probability	XCorr	Δ Score	Rank	QuanResultID	Quan Info	Quan Usage	(116+117)/(114+115)	Charge	m/z [Da]	MH+ [Da]	ΔM [ppm]	RT [min]	First Scan	Last Scan	MS Order	Ions Matched	Spectrum File
gi10092639	CRIM1	51232	cysteine-rich motor neuron 1 protein precursor	1036	113.7	1.83	1	1	1.129		S	T	Plasma membrane	Receptor activity;	Cell communication; Signal transduction;
																gi10092639	tPTkPSSLnNQLVSVDckk	1	1	HCD	N-Term(iTRAQ4plex), K4(iTRAQ4plex), N9(Deamidated), C17(Methylthio), K18(iTRAQ4plex), K19(iTRAQ4plex)	1	3.50042	1	1	14139	Unique	Used	1.12867	3	894.843	2682.51	18.0714	78.0513	5271	5271	MS2	10/72	Plasma_iTRAQ_1_3.raw
gi10518503	F7	2155	coagulation factor VII isoform b precursor	444	49.3	15.54	4	4	1.09	31.1883	S		Extracellular	Peptidase activity;	Protein metabolism;
																gi10518503	gATALELmVLNVPR	2	1	HCD	N-Term(iTRAQ4plex), M8(Oxidation)	39.3043	4.93771	1	1	18912	Unique	Used	0.310743	3	548.647	1643.93	0.395554	60.2227	5899	5899	MS2	19/52	Plasma_iTRAQ_1.raw
																gi10518503	lMTQDcLQQSR	2	1	HCD	N-Term(iTRAQ4plex), C6(Methylthio)	53.2717	3.97643	1	1	17374	Unique	Used	1.5995	2	756.86	1512.71	1.89348	46.0113	4245	4245	MS2	17/20	Plasma_iTRAQ_1.raw
																gi10518503	nLIAVLGEHDLSEHDGDEQSR	2	1	HCD	N-Term(iTRAQ4plex)	73.4092	5.55897	1	1	15402	Unique	Used	0.973194	4	620.304	2478.2	-0.955947	42.9401	3767	3767	MS2	25/120	Plasma_iTRAQ_6.raw
																gi10518503	vAQVIIPSTYVPGTTNHDIALLR	2	1	HCD	N-Term(iTRAQ4plex)	88.4669	6.38864	1	1	16671	Unique	Used	1.51256	3	874.832	2622.48	3.49971	60.9124	5585	5585	MS2	26/88	Plasma_iTRAQ_5.raw
gi105990532	APOB	338	apolipoprotein B precursor	4563	515.2	22.57	144	77	0.501	24.6026	S		Extracellular	Transporter activity;	Transport;
																gi105990532	aDSVVDLLSYNVQGSGETTYDHk	1	1	HCD	N-Term(iTRAQ4plex), K23(iTRAQ4plex)	67.4141	9.52153	1	1	16488	Unique	Used	0.565792	3	929.463	2786.37	0.500692	58.801	5377	5377	MS2	37/88	Plasma_iTRAQ_5.raw
																gi105990532	aEPLAFTFSHDYk	1	1	HCD	N-Term(iTRAQ4plex), K13(iTRAQ4plex)	90.7293	6.62575	1	1	15128	Unique	Used	0.263979	3	605.321	1813.95	7.35018	39.9751	3445	3445	MS2	27/48	Plasma_iTRAQ_6.raw
																gi105990532	aHLDIAGSLEGHLR	1	1	HCD	N-Term(iTRAQ4plex)	23.2363	4.48331	1	1	11999	Unique	Used	0.371732	4	408.986	1632.92	17.0047	34.1855	2698	2698	MS2	30/78	Plasma_iTRAQ_7.raw
																gi105990532	aLVEQGFTVPEIk	1	1	HCD	N-Term(iTRAQ4plex), K13(iTRAQ4plex)	53.6645	5.45264	1	1	19787	Unique	Used	0.295006	2	860.003	1719	3.72427	55.1549	5422	5422	MS2	18/24	Plasma_iTRAQ_3.raw
																gi105990532	aLVEQGFTVPEIk	1	1	HCD	N-Term(iTRAQ4plex), K13(iTRAQ4plex)	31.6884	4.55711	1	1	16621	Unique	Used	0.4793	3	573.669	1718.99	-1.04139	57.7369	5414	5414	MS2	19/48	Plasma_iTRAQ_4.raw
																gi105990532	aLYWVnGQVPDGVSk	1	1	HCD	N-Term(iTRAQ4plex), N6(Deamidated), K15(iTRAQ4plex)	38.6232	5.2905	1	1	19791	Unique	Used	0.538683	2	961.514	1922.02	-3.21337	55.1834	5426	5426	MS2	20/28	Plasma_iTRAQ_3.raw
																gi105990532	aLYWVnGQVPDGVSk	1	1	HCD	N-Term(iTRAQ4plex), N6(Deamidated), K15(iTRAQ4plex)	47.5018	5.02074	1	1	19569	Unique	Used	0.427691	2	961.518	1922.03	0.978378	53.2247	5184	5184	MS2	21/28	Plasma_iTRAQ_3.raw
																gi105990532	aQNLYQELLTQEGQASFQGLk	1	1	HCD	N-Term(iTRAQ4plex), K21(iTRAQ4plex)	122.012	7.36142	1	1	21059	Unique	Used	0.881542	3	885.475	2654.41	3.09998	67.2571	6819	6819	MS2	27/80	Plasma_iTRAQ_3.raw
																gi105990532	aTFQTPDFIVPLTDLR	1	1	HCD	N-Term(iTRAQ4plex)	56.2749	5.69589	1	1	20355	Unique	Used	0.177426	2	989.543	1978.08	1.0043	76.0888	7469	7469	MS2	22/30	Plasma_iTRAQ_1.raw
																gi105990532	aTFQTPDFIVPLTDLR	1	1	HCD	N-Term(iTRAQ4plex)	57.7053	5.60804	1	1	21514	Unique	Used	0.300703	2	989.543	1978.08	0.819163	71.5301	7287	7287	MS2	21/30	Plasma_iTRAQ_2.raw
																gi105990532	aTFQTPDFIVPLTDLR	1	1	HCD	N-Term(iTRAQ4plex)	34.9327	5.45937	1	1	21517	Unique	Used	0.770023	3	660.031	1978.08	0.812366	71.5491	7290	7290	MS2	15/60	Plasma_iTRAQ_2.raw
																gi105990532	aTFQTPDFIVPLTDLR	1	1	HCD	N-Term(iTRAQ4plex)	42.9676	4.75791	1	1	20374	Unique	Used	0.520025	3	660.03	1978.07	-1.31669	76.2561	7489	7489	MS2	22/60	Plasma_iTRAQ_1.raw
																gi105990532	aTGVLYDYVNk	1	1	HCD	N-Term(iTRAQ4plex), K11(iTRAQ4plex)	50.5699	5.55732	1	1	18530	Unique	Used	0.476079	2	765.924	1530.84	-0.168319	43.1713	4042	4042	MS2	18/20	Plasma_iTRAQ_3.raw
																gi105990532	aTGVLYDYVNk	1	1	HCD	N-Term(iTRAQ4plex), K11(iTRAQ4plex)	36.2956	3.63386	1	1	18547	Unique	Used	0.420341	3	510.952	1530.84	0.75985	43.3159	4060	4060	MS2	19/40	Plasma_iTRAQ_3.raw
																gi105990532	aTLYALSHAVnNYHk	1	1	HCD	N-Term(iTRAQ4plex), N11(Deamidated), K15(iTRAQ4plex)	89.9013	6.55286	1	1	11664	Unique	Used	0.618612	3	664.364	1991.08	8.96602	30.4654	2294	2294	MS2	31/56	Plasma_iTRAQ_7.raw
																gi105990532	aTLYALSHAVNNYHk	1	1	HCD	N-Term(iTRAQ4plex), K15(iTRAQ4plex)	80.3209	5.70286	1	1	11808	Unique	Used	0.757818	4	498.278	1990.09	7.83256	32.1339	2471	2471	MS2	35/84	Plasma_iTRAQ_7.raw
																gi105990532	aVSMPSFSILGSDVR	1	1	HCD	N-Term(iTRAQ4plex)	57.135	5.1687	1	1	20477	Unique	Used	0.459906	2	855.456	1709.9	1.96291	61.3317	6147	6147	MS2	19/28	Plasma_iTRAQ_2.raw
																gi105990532	aVSMPSFSILGSDVR	1	1	HCD	N-Term(iTRAQ4plex)	60.3799	4.94396	1	1	19393	Unique	Used	0.363767	2	855.456	1709.9	1.82013	65.1778	6417	6417	MS2	18/28	Plasma_iTRAQ_1.raw
																gi105990532	aVSmPSFSILGSDVR	1	1	HCD	N-Term(iTRAQ4plex), M4(Oxidation)	57.2111	4.47284	1	1	19444	Unique	Used	0.365082	2	863.454	1725.9	2.06186	52.1578	5029	5029	MS2	19/28	Plasma_iTRAQ_2.raw
																gi105990532	aVSmPSFSILGSDVR	1	1	HCD	N-Term(iTRAQ4plex), M4(Oxidation)	58.3271	4.30248	1	1	18344	Unique	Used	0.338184	2	863.454	1725.9	3.05206	54.7124	5287	5287	MS2	16/28	Plasma_iTRAQ_1.raw
																gi105990532	cVQSTkPSLMIQk	1	1	HCD	C1(Methylthio), N-Term(iTRAQ4plex), K6(iTRAQ4plex), K13(iTRAQ4plex)	52.843	6.25414	1	1	11538	Unique	Used	0.664612	2	971.05	1941.09	12.0828	29.2631	2150	2150	MS2	20/24	Plasma_iTRAQ_7.raw
																gi105990532	dLkVEDIPLAR	1	1	HCD	N-Term(iTRAQ4plex), K3(iTRAQ4plex)	51.334	3.87666	1	1	14465	Unique	Used	0.275292	3	519.647	1556.93	0.121256	33.7409	2700	2700	MS2	21/40	Plasma_iTRAQ_6.raw
																gi105990532	dNVFDGLVR	1	1	HCD	N-Term(iTRAQ4plex)	14.7133	3.35463	1	1	15765	Unique	Used	0.623872	2	589.817	1178.63	-0.885118	48.6927	4478	4478	MS2	15/16	Plasma_iTRAQ_4.raw
																gi105990532	eFQVPTFTIPk	1	1	HCD	N-Term(iTRAQ4plex), K11(iTRAQ4plex)	4.26749	3.16497	1	1	17245	Unique	Used	0.453693	2	797.958	1594.91	-0.213628	65.4814	6111	6111	MS2	13/20	Plasma_iTRAQ_4.raw
																gi105990532	eNFAGEATLQR	1	1	HCD	N-Term(iTRAQ4plex)	8.66944	4.34089	1	1	16623	Unique	Used	0.413638	2	690.35	1379.69	-7.66369	26.679	1970	1970	MS2	18/20	Plasma_iTRAQ_2.raw
																gi105990532	eNFAGEATLQR	1	1	HCD	N-Term(iTRAQ4plex)	8.74312	4.19582	1	1	15532	Unique	Used	0.324917	2	690.356	1379.7	0.476139	28.6803	2258	2258	MS2	18/20	Plasma_iTRAQ_1.raw
																gi105990532	eNFAGEATLQR	1	1	HCD	N-Term(iTRAQ4plex)	3.00169	3.94187	1	1	13605	Unique	Used	0.424972	2	690.355	1379.7	-1.02795	27.2843	2134	2134	MS2	18/20	Plasma_iTRAQ_4.raw
																gi105990532	eQHLFLPFSYk	1	1	HCD	N-Term(iTRAQ4plex), K11(iTRAQ4plex)	47.0706	4.02448	1	1	13108	Unique	Used	0.630704	3	566.313	1696.92	-3.15246	47.1426	4054	4054	MS2	18/40	Plasma_iTRAQ_7.raw
																gi105990532	eSQLPTVMDFR	1	1	HCD	N-Term(iTRAQ4plex)	11.9174	3.95571	1	1	18171	Unique	Used	0.479304	2	733.876	1466.74	1.19603	53.0634	5101	5101	MS2	16/20	Plasma_iTRAQ_1.raw
																gi105990532	eSQLPTVMDFR	1	1	HCD	N-Term(iTRAQ4plex)	11.9391	3.70622	1	1	16309	Unique	Used	0.532509	2	733.876	1466.74	1.19603	54.4598	5075	5075	MS2	16/20	Plasma_iTRAQ_4.raw
																gi105990532	fQFPGkPGIYTR	1	1	HCD	N-Term(iTRAQ4plex), K6(iTRAQ4plex)	25.3962	3.8943	1	1	12244	Unique	Used	0.288402	3	566.989	1698.95	-2.34863	36.7835	2989	2989	MS2	22/44	Plasma_iTRAQ_7.raw
																gi105990532	fQFPGkPGIYTR	1	1	HCD	N-Term(iTRAQ4plex), K6(iTRAQ4plex)	5.45459	3.86418	1	1	12271	Unique	Used	0.447958	2	849.984	1698.96	1.89844	37.0865	3021	3021	MS2	12/22	Plasma_iTRAQ_7.raw
																gi105990532	fSVPAGIVIPSFQALTAR	1	1	HCD	N-Term(iTRAQ4plex)	46.0374	6.03309	1	1	21883	Unique	Used	0.271812	2	1009.58	2018.16	1.25082	75.4974	7702	7702	MS2	21/34	Plasma_iTRAQ_2.raw
																gi105990532	fSVPAGIVIPSFQALTAR	1	1	HCD	N-Term(iTRAQ4plex)	51.0921	5.65522	1	1	21861	Unique	Used	0.369378	2	1009.58	2018.16	1.55325	75.8559	7726	7726	MS2	23/34	Plasma_iTRAQ_3.raw
																gi105990532	fSVPAGIVIPSFQALTAR	1	1	HCD	N-Term(iTRAQ4plex)	65.3394	4.59596	1	1	21888	Unique	Used	0.291309	3	673.391	2018.16	1.12319	75.5621	7708	7708	MS2	26/68	Plasma_iTRAQ_2.raw
																gi105990532	fVTQAEGAk	1	1	HCD	N-Term(iTRAQ4plex), K9(iTRAQ4plex)	25.3944	3.81015	1	1	16128	Unique	Used	0.26287	2	619.859	1238.71	9.70965	21.4201	1415	1415	MS2	16/16	Plasma_iTRAQ_3.raw
																gi105990532	gFEPTLEALFGk	1	1	HCD	N-Term(iTRAQ4plex), K12(iTRAQ4plex)	26.9542	4.43366	1	1	17735	Unique	Used	1.09253	3	532.967	1596.89	-0.662228	74.5589	6824	6824	MS2	21/44	Plasma_iTRAQ_5.raw
																gi105990532	gIISALLVPPETEEAk	1	1	HCD	N-Term(iTRAQ4plex), K16(iTRAQ4plex)	88.4737	4.97533	1	1	20706	Unique	Used	0.902185	2	978.069	1955.13	0.323121	63.8283	6429	6429	MS2	19/30	Plasma_iTRAQ_3.raw
																gi105990532	gIISALLVPPETEEAk	1	1	HCD	N-Term(iTRAQ4plex), K16(iTRAQ4plex)	63.8531	4.86414	1	1	20616	Unique	Used	1.01249	2	978.071	1955.13	2.00889	62.9243	6328	6328	MS2	17/30	Plasma_iTRAQ_3.raw
																gi105990532	gIISALLVPPETEEAk	1	1	HCD	N-Term(iTRAQ4plex), K16(iTRAQ4plex)	61.4225	4.73267	1	1	17687	Unique	Used	0.84524	2	978.068	1955.13	-0.488546	71.6247	6623	6623	MS2	18/30	Plasma_iTRAQ_4.raw
																gi105990532	gIISALLVPPETEEAk	1	1	HCD	N-Term(iTRAQ4plex), K16(iTRAQ4plex)	59.1798	3.86101	1	1	20634	Unique	Used	1.12689	3	652.382	1955.13	1.12791	63.1235	6349	6349	MS2	21/60	Plasma_iTRAQ_3.raw
																gi105990532	gISTSAASPAVGTVGMDMDEDDDFSk	1	1	HCD	N-Term(iTRAQ4plex), K26(iTRAQ4plex)	92.2972	7.81526	1	1	16374	Unique	Used	0.657885	3	964.444	2891.32	0.311877	55.1761	5147	5147	MS2	27/100	Plasma_iTRAQ_4.raw
																gi105990532	gMALFGEGk	1	1	HCD	N-Term(iTRAQ4plex), K9(iTRAQ4plex)	22.8892	3.5122	1	1	14348	Unique	Used	0.450853	2	599.327	1197.65	-6.38535	34.7621	2903	2903	MS2	15/16	Plasma_iTRAQ_5.raw
																gi105990532	gMTRPLSTLISSSQScQYTLDAk	1	1	HCD	N-Term(iTRAQ4plex), C16(Methylthio), K23(iTRAQ4plex)	68.1273	9.10035	1	1	16887	Unique	Used	0.876027	3	941.145	2821.42	2.4669	59.1194	5520	5520	MS2	27/88	Plasma_iTRAQ_6.raw
																gi105990532	iAELSATAQEIIk	1	1	HCD	N-Term(iTRAQ4plex), K13(iTRAQ4plex)	41.7556	6.62606	1	1	20105	Unique	Used	0.334203	2	837.998	1674.99	0.739176	58.0512	5766	5766	MS2	23/24	Plasma_iTRAQ_3.raw
																gi105990532	iAELSATAQEIIk	1	1	HCD	N-Term(iTRAQ4plex), K13(iTRAQ4plex)	49.0988	3.63036	1	1	20079	Unique	Used	0.580837	3	559.001	1674.99	0.512513	57.833	5738	5738	MS2	20/48	Plasma_iTRAQ_3.raw
																gi105990532	iEDGTLASk	1	1	HCD	N-Term(iTRAQ4plex), K9(iTRAQ4plex)	8.65806	3.51718	1	1	16154	Unique	Used	0.380679	2	611.357	1221.71	10.9839	21.6188	1443	1443	MS2	15/16	Plasma_iTRAQ_3.raw
																gi105990532	iEIPLPFGGk	1	1	HCD	N-Term(iTRAQ4plex), K10(iTRAQ4plex)	44.1729	3.85954	1	1	16804	Unique	Used	0.371022	2	679.914	1358.82	-5.46997	58.1984	5421	5421	MS2	14/18	Plasma_iTRAQ_6.raw
																gi105990532	iEIPLPFGGk	1	1	HCD	N-Term(iTRAQ4plex), K10(iTRAQ4plex)	48.6289	3.8143	1	1	16817	Unique	Used	0.236984	2	679.921	1358.84	5.13056	58.3252	5436	5436	MS2	14/18	Plasma_iTRAQ_6.raw
																gi105990532	iEIPLPFGGk	1	1	HCD	N-Term(iTRAQ4plex), K10(iTRAQ4plex)	43.0353	3.40222	1	1	16832	Unique	Used	0.332898	2	679.923	1358.84	7.55607	62.8509	5773	5773	MS2	14/18	Plasma_iTRAQ_5.raw
																gi105990532	iHSGSFQSQVELSNDQEk	1	1	HCD	N-Term(iTRAQ4plex), K18(iTRAQ4plex)	25.2689	7.46362	1	1	13734	Unique	Used	0.677795	3	774.396	2321.17	5.57052	26.762	1871	1871	MS2	23/68	Plasma_iTRAQ_6.raw
																gi105990532	iLGEELGFASLHDLQLLGk	1	1	HCD	N-Term(iTRAQ4plex), K19(iTRAQ4plex)	300	8.62057	1	1	17825	Unique	Used	0.495038	3	781.12	2341.34	3.26837	71.8237	6736	6736	MS2	31/72	Plasma_iTRAQ_6.raw
																gi105990532	iLGEELGFASLHDLqLLGk	1	1	HCD	N-Term(iTRAQ4plex), Q15(Deamidated), K19(iTRAQ4plex)	134.59	8.49946	1	1	17973	Unique	Used	0.548518	3	781.447	2342.33	1.70047	74.1204	6937	6937	MS2	30/72	Plasma_iTRAQ_6.raw
																gi105990532	iLGEELGFASLHDLQLLGk	1	1	HCD	N-Term(iTRAQ4plex), K19(iTRAQ4plex)	139.955	5.6763	1	1	17853	Unique	Used	0.378711	2	1171.17	2341.34	0.484793	72.2265	6773	6773	MS2	25/36	Plasma_iTRAQ_6.raw
																gi105990532	iNPLALk	1	1	HCD	N-Term(iTRAQ4plex), K7(iTRAQ4plex)	13.1372	3.27104	1	1	14715	Unique	Used	0.319705	2	528.857	1056.71	4.72172	38.8842	3328	3328	MS2	11/12	Plasma_iTRAQ_5.raw
																gi105990532	iTEnDIQIALDDAk	1	1	HCD	N-Term(iTRAQ4plex), N4(Deamidated), K14(iTRAQ4plex)	61.5504	5.64599	1	1	19525	Unique	Used	0.427792	2	924.498	1847.99	2.01693	52.8074	5115	5115	MS2	21/26	Plasma_iTRAQ_2.raw
																gi105990532	iTENDIQIALDDAk	1	1	HCD	N-Term(iTRAQ4plex), K14(iTRAQ4plex)	74.8838	5.43999	1	1	20135	Unique	Used	0.334709	2	923.995	1846.98	-9.14757	58.1075	5772	5772	MS2	22/26	Plasma_iTRAQ_2.raw
																gi105990532	iTENDIQIALDDAk	1	1	HCD	N-Term(iTRAQ4plex), K14(iTRAQ4plex)	49.9179	4.77589	1	1	17051	Unique	Used	0.415392	3	616.337	1847	-1.91779	62.9507	5892	5892	MS2	20/52	Plasma_iTRAQ_4.raw
																gi105990532	iTENDIQIALDDAk	1	1	HCD	N-Term(iTRAQ4plex), K14(iTRAQ4plex)	31.0862	3.91855	1	1	20133	Unique	Used	0.385192	3	616.333	1846.98	-8.2626	58.0951	5770	5770	MS2	21/52	Plasma_iTRAQ_2.raw
																gi105990532	kLTISEQNIQR	1	1	HCD	N-Term(iTRAQ4plex), K1(iTRAQ4plex)	43.9625	4.88334	1	1	13432	Unique	Used	0.680745	3	539.987	1617.95	-3.84562	23.3642	1510	1510	MS2	26/40	Plasma_iTRAQ_6.raw
																gi105990532	kYTYNYEAESSSGVPGTADSR	1	1	HCD	N-Term(iTRAQ4plex), K1(iTRAQ4plex)	43.2444	7.58819	1	1	13754	Unique	Used	1.14503	3	857.418	2570.24	5.67605	26.9387	1893	1893	MS2	22/80	Plasma_iTRAQ_6.raw
																gi105990532	kYTYNYEAESSSGVPGTADSR	1	1	HCD	N-Term(iTRAQ4plex), K1(iTRAQ4plex)	124.035	6.67264	1	1	13711	Unique	Used	0.734982	2	1285.62	2570.23	1.31186	26.5314	1845	1845	MS2	29/40	Plasma_iTRAQ_6.raw
																gi105990532	kYTYNyEAESSSGVPGTADSR	1	1	HCD	N-Term(iTRAQ4plex), K1(iTRAQ4plex), Y6(iTRAQ4plex)	29.7348	3.75086	1	1	10881	Unique	Used	0.3153	4	679.339	2714.33	2.53201	22.0263	1356	1356	MS2	22/120	Plasma_iTRAQ_7.raw
																gi105990532	lAAYLMLMR	1	1	HCD	N-Term(iTRAQ4plex)	33.9943	3.55741	1	1	21080	Unique	Used	0.486221	2	613.35	1225.69	0.718167	67.4563	6842	6842	MS2	14/16	Plasma_iTRAQ_3.raw
																gi105990532	lDFSSQADLR	1	1	HCD	N-Term(iTRAQ4plex)	18.6707	3.816	1	1	17126	Unique	Used	0.29193	2	648.34	1295.67	0.99458	43.6271	3979	3979	MS2	17/18	Plasma_iTRAQ_1.raw
																gi105990532	lDNIYSSDk	1	1	HCD	N-Term(iTRAQ4plex), K9(iTRAQ4plex)	25.0844	3.79167	1	1	16631	Unique	Used	0.609167	2	671.857	1342.71	-2.00843	25.6035	1960	1960	MS2	14/16	Plasma_iTRAQ_3.raw
																gi105990532	lEIQSQVDSQHVGHSVLTAk	1	1	HCD	N-Term(iTRAQ4plex), K20(iTRAQ4plex)	74.72	5.14224	1	1	11674	Unique	Used	0.546496	3	822.127	2464.37	11.3188	30.553	2305	2305	MS2	26/76	Plasma_iTRAQ_7.raw
																gi105990532	lIDVISMYR	1	1	HCD	N-Term(iTRAQ4plex)	14.6336	3.45183	1	1	20500	Unique	Used	0.297475	2	627.356	1253.71	0.827654	61.6108	6173	6173	MS2	14/16	Plasma_iTRAQ_2.raw
																gi105990532	lIVAMSSWLQk	1	1	HCD	N-Term(iTRAQ4plex), K11(iTRAQ4plex)	52.4136	4.99252	1	1	17579	Unique	Used	0.514453	2	782.465	1563.92	3.20952	72.3201	6644	6644	MS2	16/20	Plasma_iTRAQ_5.raw
																gi105990532	lLSGGNTLHLVSTTk	1	1	HCD	N-Term(iTRAQ4plex), K15(iTRAQ4plex)	45.4901	5.05152	1	1	14648	Unique	Used	0.432039	2	915.051	1829.09	11.6883	35.3285	2902	2902	MS2	20/28	Plasma_iTRAQ_6.raw
																gi105990532	lLSGGnTLHLVSTTk	1	1	HCD	N-Term(iTRAQ4plex), N6(Deamidated), K15(iTRAQ4plex)	23.7233	4.27996	1	1	15289	Unique	Used	0.562566	3	610.692	1830.06	1.56532	41.5875	3630	3630	MS2	20/56	Plasma_iTRAQ_6.raw
																gi105990532	lLSGGNTLHLVSTTk	1	1	HCD	N-Term(iTRAQ4plex), K15(iTRAQ4plex)	42.6692	4.00535	1	1	14687	Unique	Used	0.280748	2	915.034	1829.06	-7.13202	35.6469	2944	2944	MS2	23/28	Plasma_iTRAQ_6.raw
																gi105990532	lnGEIQALELPQk	1	1	HCD	N-Term(iTRAQ4plex), N2(Deamidated), K13(iTRAQ4plex)	48.4247	5.42203	1	1	19702	Unique	Used	0.449768	2	871.503	1742	2.90796	54.3659	5328	5328	MS2	21/24	Plasma_iTRAQ_3.raw
																gi105990532	lnGEIQALELPQk	1	1	HCD	N-Term(iTRAQ4plex), N2(Deamidated), K13(iTRAQ4plex)	38.5981	3.47464	1	1	19698	Unique	Used	1.01369	3	581.337	1742	1.11334	54.3172	5323	5323	MS2	19/48	Plasma_iTRAQ_3.raw
																gi105990532	lPYTIITTPPLk	1	1	HCD	N-Term(iTRAQ4plex), K12(iTRAQ4plex)	37.3053	4.33713	1	1	16591	Unique	Used	0.481608	2	823.013	1645.02	1.10249	59.9668	5493	5493	MS2	15/22	Plasma_iTRAQ_5.raw
																gi105990532	lPYTIITTPPLk	1	1	HCD	N-Term(iTRAQ4plex), K12(iTRAQ4plex)	23.9099	4.32772	1	1	16584	Unique	Used	0.657147	3	549.012	1645.02	2.54133	59.8901	5485	5485	MS2	16/44	Plasma_iTRAQ_5.raw
																gi105990532	lQDFSDQLSDYYEk	1	1	HCD	N-Term(iTRAQ4plex), K14(iTRAQ4plex)	57.9106	6.12161	1	1	20055	Unique	Used	0.364907	2	1020	2038.99	0.110668	57.4285	5686	5686	MS2	21/26	Plasma_iTRAQ_2.raw
																gi105990532	lQDFSDQLSDYYEk	1	1	HCD	N-Term(iTRAQ4plex), K14(iTRAQ4plex)	75.5556	5.87812	1	1	20184	Unique	Used	0.336165	2	1020	2038.99	0.230404	58.7449	5851	5851	MS2	21/26	Plasma_iTRAQ_3.raw
																gi105990532	lSNDMMGSYAEMk	1	1	HCD	N-Term(iTRAQ4plex), K13(iTRAQ4plex)	40.6462	4.2952	1	1	18969	Unique	Used	0.360888	2	882.918	1764.83	4.15755	47.5024	4525	4525	MS2	18/24	Plasma_iTRAQ_3.raw
																gi105990532	lTISEQNIQR	1	1	HCD	N-Term(iTRAQ4plex)	11.7574	4.5574	1	1	15698	Unique	Used	0.682674	2	673.383	1345.76	2.3796	30.0746	2435	2435	MS2	16/18	Plasma_iTRAQ_1.raw
																gi105990532	lTISEQNIQR	1	1	HCD	N-Term(iTRAQ4plex)	16.7157	4.30005	1	1	16751	Unique	Used	0.617788	2	673.377	1345.75	-6.69121	27.7282	2107	2107	MS2	15/18	Plasma_iTRAQ_2.raw
																gi105990532	lTISEQNIQR	1	1	HCD	N-Term(iTRAQ4plex)	24.0319	4.16731	1	1	13777	Unique	Used	0.682541	2	673.384	1345.76	3.55879	28.8004	2320	2320	MS2	16/18	Plasma_iTRAQ_4.raw
																gi105990532	lTISEQNIQR	1	1	HCD	N-Term(iTRAQ4plex)	24.1643	3.84902	1	1	16791	Unique	Used	0.595227	2	673.384	1345.76	4.19374	28.026	2149	2149	MS2	17/18	Plasma_iTRAQ_2.raw
																gi105990532	mTSNFPVDLSDYPk	1	1	HCD	N-Term(iTRAQ4plex), K14(iTRAQ4plex)	68.7569	5.62096	1	1	19946	Unique	Used	0.353299	2	951.481	1901.96	-0.278401	56.6756	5595	5595	MS2	19/26	Plasma_iTRAQ_3.raw
																gi105990532	mTSNFPVDLSDYPk	1	1	HCD	N-Term(iTRAQ4plex), K14(iTRAQ4plex)	73.0632	5.49401	1	1	19862	Unique	Used	0.415909	2	951.487	1901.97	5.69044	55.8405	5503	5503	MS2	19/26	Plasma_iTRAQ_3.raw
																gi105990532	mTSNFPVDLSDYPk	1	1	HCD	N-Term(iTRAQ4plex), M1(Oxidation), K14(iTRAQ4plex)	32.7132	5.0513	1	1	19248	Unique	Used	0.475912	2	959.484	1917.96	4.85737	50.1909	4830	4830	MS2	17/26	Plasma_iTRAQ_3.raw
																gi105990532	mTSNFPVDLSDYPk	1	1	HCD	N-Term(iTRAQ4plex), M1(Oxidation), K14(iTRAQ4plex)	25.3726	4.48961	1	1	19131	Unique	Used	0.508704	2	959.481	1917.95	1.92966	49.106	4685	4685	MS2	16/26	Plasma_iTRAQ_2.raw
																gi105990532	mYQMDIQQELQR	1	1	HCD	N-Term(iTRAQ4plex)	43.3646	5.03004	1	1	18029	Unique	Used	0.264397	2	863.923	1726.84	1.25712	51.9092	4950	4950	MS2	18/22	Plasma_iTRAQ_1.raw
																gi105990532	mYQMDIQQELQR	1	1	HCD	N-Term(iTRAQ4plex)	20.4223	4.45112	1	1	16115	Unique	Used	0.51334	2	863.924	1726.84	2.52953	52.4597	4865	4865	MS2	17/22	Plasma_iTRAQ_4.raw
																gi105990532	mYQMDIQQELQR	1	1	HCD	N-Term(iTRAQ4plex)	40.5667	4.42822	1	1	19117	Unique	Used	0.336567	2	863.925	1726.84	3.51919	48.9782	4670	4670	MS2	18/22	Plasma_iTRAQ_2.raw
																gi105990532	nFVASHIANILNSEELDIQDLk	1	1	HCD	N-Term(iTRAQ4plex), K22(iTRAQ4plex)	101.113	8.34025	1	1	17822	Unique	Used	0.810505	3	924.502	2771.49	2.93961	71.8051	6733	6733	MS2	31/84	Plasma_iTRAQ_6.raw
																gi105990532	nFVASHIANILNSEELDIQDLkk	1	1	HCD	N-Term(iTRAQ4plex), K22(iTRAQ4plex), K23(iTRAQ4plex)	69.235	4.92901	1	1	14478	Unique	Used	0.01	4	761.676	3043.68	1.2648	66.7649	5895	5895	MS2	24/132	Plasma_iTRAQ_7.raw
																gi105990532	nIILPVYDk	1	1	HCD	N-Term(iTRAQ4plex), K9(iTRAQ4plex)	29.5925	3.56228	1	1	18596	Unique	Used	0.286053	2	681.916	1362.83	1.25153	43.7287	4113	4113	MS2	12/16	Plasma_iTRAQ_3.raw
																gi105990532	nIQEYLSILTDPDGk	1	1	HCD	N-Term(iTRAQ4plex), K15(iTRAQ4plex)	37.8187	5.82302	1	1	21505	Unique	Used	0.44084	3	665.362	1994.07	1.5702	71.4298	7277	7277	MS2	21/56	Plasma_iTRAQ_2.raw
																gi105990532	nIQEYLSILTDPDGk	1	1	HCD	N-Term(iTRAQ4plex), K15(iTRAQ4plex)	49.5946	5.6443	1	1	21516	Unique	Used	0.601466	3	665.362	1994.07	1.11108	72.2584	7338	7338	MS2	21/56	Plasma_iTRAQ_3.raw
																gi105990532	nIQEYLSILTDPDGk	1	1	HCD	N-Term(iTRAQ4plex), K15(iTRAQ4plex)	67.4886	5.32666	1	1	21544	Unique	Used	0.31742	2	997.539	1994.07	1.24025	72.5959	7371	7371	MS2	18/28	Plasma_iTRAQ_3.raw
																gi105990532	nLTDFAEQYSIQDWAk	1	1	HCD	N-Term(iTRAQ4plex), K16(iTRAQ4plex)	52.9315	5.45584	1	1	20851	Unique	Used	0.569062	3	739.71	2217.12	4.31542	65.2798	6591	6591	MS2	22/60	Plasma_iTRAQ_3.raw
																gi105990532	nLTDFAEQYSIQDWAk	1	1	HCD	N-Term(iTRAQ4plex), K16(iTRAQ4plex)	13.9132	4.91389	1	1	20871	Unique	Used	0.402397	2	1109.06	2217.11	1.23823	65.4349	6612	6612	MS2	16/30	Plasma_iTRAQ_3.raw
																gi105990532	nMEVSVATTTk	1	1	HCD	N-Term(iTRAQ4plex), K11(iTRAQ4plex)	54.0334	4.52535	1	1	16269	Unique	Used	0.374809	2	734.898	1468.79	-1.9657	23.2732	1582	1582	MS2	17/20	Plasma_iTRAQ_2.raw
																gi105990532	nNALDFVTk	1	1	HCD	N-Term(iTRAQ4plex), K9(iTRAQ4plex)	28.0285	4.40747	1	1	17711	Unique	Used	0.351336	2	655.376	1309.75	7.78454	35.3318	3137	3137	MS2	15/16	Plasma_iTRAQ_3.raw
																gi105990532	nPnGYSFSIPVk	1	1	HCD	N-Term(iTRAQ4plex), N3(Deamidated), K12(iTRAQ4plex)	49.8865	4.29176	1	1	19096	Unique	Used	0.429854	2	806.438	1611.87	3.70768	48.7037	4664	4664	MS2	16/22	Plasma_iTRAQ_3.raw
																gi105990532	nSEEFAAAMSR	1	1	HCD	N-Term(iTRAQ4plex)	37.6276	4.80222	1	1	15617	Unique	Used	0.836966	2	678.822	1356.64	1.78202	29.4127	2349	2349	MS2	18/20	Plasma_iTRAQ_1.raw
																gi105990532	nSEEFAAAMSR	1	1	HCD	N-Term(iTRAQ4plex)	28.7546	4.57772	1	1	16684	Unique	Used	0.800602	2	678.815	1356.62	-8.29584	27.1836	2035	2035	MS2	18/20	Plasma_iTRAQ_2.raw
																gi105990532	nSEEFAAAMSR	1	1	HCD	N-Term(iTRAQ4plex)	25.9234	4.17154	1	1	13686	Unique	Used	0.944942	2	678.823	1356.64	3.31168	28.0233	2222	2222	MS2	18/20	Plasma_iTRAQ_4.raw
																gi105990532	nTLELSnGVIVk	1	1	HCD	N-Term(iTRAQ4plex), N7(Deamidated), K12(iTRAQ4plex)	44.8858	5.67785	1	1	18517	Unique	Used	0.684529	2	788.461	1575.92	-2.58158	43.0203	4027	4027	MS2	18/22	Plasma_iTRAQ_3.raw
																gi105990532	qSFDLSVk	1	1	HCD	N-Term(iTRAQ4plex), K8(iTRAQ4plex)	34.6222	3.9158	1	1	16874	Unique	Used	0.306266	2	606.342	1211.68	-8.67378	27.5223	2220	2220	MS2	13/14	Plasma_iTRAQ_3.raw
																gi105990532	qVFLYPEkDEPTYILNIk	1	1	HCD	N-Term(iTRAQ4plex), K8(iTRAQ4plex), K18(iTRAQ4plex)	46.2361	6.21925	1	1	16704	Unique	Used	0.716921	3	881.5	2642.48	1.41451	57.0527	5301	5301	MS2	25/68	Plasma_iTRAQ_6.raw
																gi105990532	qVFLYPEkDEPTYILNIk	1	1	HCD	N-Term(iTRAQ4plex), K8(iTRAQ4plex), K18(iTRAQ4plex)	41.9489	4.82495	1	1	16713	Unique	Used	1.03192	4	661.374	2642.48	-1.93974	57.1389	5311	5311	MS2	19/102	Plasma_iTRAQ_6.raw
																gi105990532	sEYQADYESLR	1	1	HCD	N-Term(iTRAQ4plex)	31.7431	4.71051	1	1	15847	Unique	Used	0.295955	2	752.853	1504.7	-3.1529	31.382	2595	2595	MS2	18/20	Plasma_iTRAQ_1.raw
																gi105990532	sFDYHQFVDETNDk	1	1	HCD	N-Term(iTRAQ4plex), K14(iTRAQ4plex)	68.7355	5.26833	1	1	15242	Unique	Used	0.374284	3	678.322	2032.95	0.646976	41.1655	3578	3578	MS2	21/52	Plasma_iTRAQ_6.raw
																gi105990532	sFDYHQFVDETnDk	1	1	HCD	N-Term(iTRAQ4plex), N12(Deamidated), K14(iTRAQ4plex)	27.0391	4.28406	1	1	15509	Unique	Used	0.759344	3	678.649	2033.93	0.102966	44.0732	3892	3892	MS2	16/52	Plasma_iTRAQ_6.raw
																gi105990532	sPAFTDLHLR	1	1	HCD	N-Term(iTRAQ4plex)	48.6063	5.30056	1	1	14643	Unique	Used	0.288037	3	434.242	1300.71	-2.13311	37.2705	3256	3256	MS2	19/36	Plasma_iTRAQ_4.raw
																gi105990532	sPAFTDLHLR	1	1	HCD	N-Term(iTRAQ4plex)	50.5124	4.4181	1	1	14157	Unique	Used	0.419162	3	434.244	1300.72	3.00511	30.5679	2344	2344	MS2	20/36	Plasma_iTRAQ_6.raw
																gi105990532	sVSDGIAALDLNAVANk	1	1	HCD	N-Term(iTRAQ4plex), K17(iTRAQ4plex)	102.684	7.1927	1	1	20007	Unique	Used	0.419021	2	973.547	1946.09	3.70197	57.1848	5660	5660	MS2	24/32	Plasma_iTRAQ_3.raw
																gi105990532	sVSDGIAALDLNAVANk	1	1	HCD	N-Term(iTRAQ4plex), K17(iTRAQ4plex)	88.2896	7.11501	1	1	19893	Unique	Used	0.344273	2	973.544	1946.08	0.753852	55.9024	5510	5510	MS2	24/32	Plasma_iTRAQ_2.raw
																gi105990532	sVSDGIAALDLNAVANk	1	1	HCD	N-Term(iTRAQ4plex), K17(iTRAQ4plex)	61.4134	6.57743	1	1	16778	Unique	Used	0.435726	3	649.365	1946.08	0.809668	59.5111	5586	5586	MS2	26/64	Plasma_iTRAQ_4.raw
																gi105990532	sVSDGIAALDLNAVANk	1	1	HCD	N-Term(iTRAQ4plex), K17(iTRAQ4plex)	58.8913	5.87228	1	1	19874	Unique	Used	0.543298	3	649.365	1946.08	0.151043	55.7526	5490	5490	MS2	23/64	Plasma_iTRAQ_2.raw
																gi105990532	sVSDGIAALDLNAVANk	1	1	HCD	N-Term(iTRAQ4plex), K17(iTRAQ4plex)	47.5896	5.62958	1	1	20002	Unique	Used	0.753161	3	649.368	1946.09	4.29096	57.1534	5655	5655	MS2	22/64	Plasma_iTRAQ_3.raw
																gi105990532	sVSLPSLDPASAk	1	1	HCD	N-Term(iTRAQ4plex), K13(iTRAQ4plex)	29.3615	4.87094	1	1	15507	Unique	Used	0.582386	3	520.633	1559.89	-1.56992	46.2538	4200	4200	MS2	18/48	Plasma_iTRAQ_4.raw
																gi105990532	sVSLPSLDPASAk	1	1	HCD	N-Term(iTRAQ4plex), K13(iTRAQ4plex)	55.806	4.86746	1	1	15499	Unique	Used	0.45232	2	780.449	1559.89	1.72545	46.1739	4191	4191	MS2	17/24	Plasma_iTRAQ_4.raw
																gi105990532	sVSLPSLDPASAk	1	1	HCD	N-Term(iTRAQ4plex), K13(iTRAQ4plex)	50.4181	4.7553	1	1	18459	Unique	Used	0.4382	2	780.45	1559.89	3.05579	42.4708	3963	3963	MS2	17/24	Plasma_iTRAQ_3.raw
																gi105990532	tGISPLALIk	1	1	HCD	N-Term(iTRAQ4plex), K10(iTRAQ4plex)	39.4524	4.63128	1	1	16132	Unique	Used	0.650495	2	650.924	1300.84	-2.06556	54.8622	4970	4970	MS2	17/18	Plasma_iTRAQ_5.raw
																gi105990532	tGISPLALIk	1	1	HCD	N-Term(iTRAQ4plex), K10(iTRAQ4plex)	27.3942	4.59025	1	1	16624	Unique	Used	0.671907	2	650.924	1300.84	-2.34708	57.7858	5418	5418	MS2	16/18	Plasma_iTRAQ_4.raw
																gi105990532	tIHDLHLFIENIDFNk	1	1	HCD	N-Term(iTRAQ4plex), K16(iTRAQ4plex)	63.7431	6.30081	1	1	14028	Unique	Used	0.30278	3	753.08	2257.22	1.31197	59.5814	5261	5261	MS2	29/60	Plasma_iTRAQ_7.raw
																gi105990532	tILGTMPAFEVSLQALQk	1	1	HCD	N-Term(iTRAQ4plex), K18(iTRAQ4plex)	73.3868	6.97617	1	1	21837	Unique	Used	0.496617	3	745.761	2235.27	1.6478	75.651	7700	7700	MS2	26/68	Plasma_iTRAQ_3.raw
																gi105990532	tLADLTLLDSPIk	1	1	HCD	N-Term(iTRAQ4plex), K13(iTRAQ4plex)	63.3522	6.3954	1	1	20765	Unique	Used	0.269936	2	844.511	1688.01	3.40071	64.4403	6496	6496	MS2	21/24	Plasma_iTRAQ_3.raw
																gi105990532	tLADLTLLDSPIk	1	1	HCD	N-Term(iTRAQ4plex), K13(iTRAQ4plex)	28.4921	5.40748	1	1	20757	Unique	Used	0.253376	3	563.342	1688.01	1.94643	64.3633	6487	6487	MS2	18/48	Plasma_iTRAQ_3.raw
																gi105990532	tLQGIPQMIGEVIR	1	1	HCD	N-Term(iTRAQ4plex)	35.7686	4.71295	1	1	20346	Unique	Used	0.287644	2	849.991	1698.97	2.89378	76.0069	7459	7459	MS2	17/26	Plasma_iTRAQ_1.raw
																gi105990532	tLQGIPQMIGEVIR	1	1	HCD	N-Term(iTRAQ4plex)	45.1603	4.63187	1	1	21473	Unique	Used	0.348836	2	849.99	1698.97	2.10344	71.1302	7242	7242	MS2	18/26	Plasma_iTRAQ_2.raw
																gi105990532	tLQGIPQmIGEVIR	1	1	HCD	N-Term(iTRAQ4plex), M8(Oxidation)	42.3205	4.31758	1	1	19018	Unique	Used	0.355345	3	572.328	1714.97	3.01244	61.3665	6013	6013	MS2	22/52	Plasma_iTRAQ_1.raw
																gi105990532	tSSFALNLPTLPEVk	1	1	HCD	N-Term(iTRAQ4plex), K15(iTRAQ4plex)	39.0714	5.10882	1	1	17798	Unique	Used	1.01634	3	635.702	1905.09	-1.76012	73.2227	6750	6750	MS2	22/56	Plasma_iTRAQ_4.raw
																gi105990532	vLVDHFGYTk	1	1	HCD	N-Term(iTRAQ4plex), K10(iTRAQ4plex)	32.024	4.15162	1	1	13996	Unique	Used	0.569223	2	733.917	1466.83	2.02133	29.055	2162	2162	MS2	14/18	Plasma_iTRAQ_6.raw
																gi105990532	vLVDHFGYTk	1	1	HCD	N-Term(iTRAQ4plex), K10(iTRAQ4plex)	43.2157	3.86291	1	1	13994	Unique	Used	0.245038	3	489.614	1466.83	2.78195	29.0434	2160	2160	MS2	16/36	Plasma_iTRAQ_6.raw
																gi105990532	vNWEEEAASGLLTSLk	1	1	HCD	N-Term(iTRAQ4plex), K16(iTRAQ4plex)	66.409	6.3885	1	1	21526	Unique	Used	0.737861	3	679.039	2035.1	2.99843	72.3794	7350	7350	MS2	22/60	Plasma_iTRAQ_3.raw
																gi105990532	vPLLLSEPINIIDALEmR	1	1	HCD	N-Term(iTRAQ4plex), M17(Oxidation)	11.8934	5.29316	1	1	22056	Unique	Used	0.686922	3	732.754	2196.25	2.00907	77.7014	7942	7942	MS2	18/68	Plasma_iTRAQ_3.raw
																gi105990532	vPSYTLILPSLELPVLHVPR	1	1	HCD	N-Term(iTRAQ4plex)	115.158	7.21256	1	1	18038	Unique	Used	0.319791	3	796.479	2387.42	1.10551	75.1603	7027	7027	MS2	27/76	Plasma_iTRAQ_6.raw
																gi105990532	vSTAFVYTk	1	1	HCD	N-Term(iTRAQ4plex), K9(iTRAQ4plex)	37.6645	3.97189	1	1	17103	Unique	Used	0.460635	2	652.375	1303.74	-5.50864	29.5305	2468	2468	MS2	15/16	Plasma_iTRAQ_3.raw
																gi105990532	yENYELTLk	1	1	HCD	N-Term(iTRAQ4plex), K9(iTRAQ4plex)	19.4812	3.90999	1	1	18240	Unique	Used	0.32435	2	730.903	1460.8	7.76864	40.5547	3707	3707	MS2	14/16	Plasma_iTRAQ_2.raw
																gi105990532	yGMVAQVTQTLk	1	1	HCD	N-Term(iTRAQ4plex), K12(iTRAQ4plex)	63.0709	5.42708	1	1	19348	Unique	Used	0.783772	2	813.961	1626.92	1.56954	51.1713	4941	4941	MS2	18/22	Plasma_iTRAQ_3.raw
																gi105990532	yGMVAQVTQTLk	1	1	HCD	N-Term(iTRAQ4plex), K12(iTRAQ4plex)	52.5304	5.18648	1	1	19423	Unique	Used	0.788386	3	542.973	1626.91	-4.40378	51.8584	5024	5024	MS2	20/44	Plasma_iTRAQ_3.raw
																gi105990532	yGMVAQVTQTLk	1	1	HCD	N-Term(iTRAQ4plex), K12(iTRAQ4plex)	42.7761	5.18265	1	1	19351	Unique	Used	0.842408	3	542.975	1626.91	-1.59007	51.1901	4944	4944	MS2	20/44	Plasma_iTRAQ_3.raw
																gi105990532	yGMVAQVTQTLk	1	1	HCD	N-Term(iTRAQ4plex), K12(iTRAQ4plex)	30.3661	5.15038	1	1	19445	Unique	Used	0.830233	2	813.962	1626.92	2.69501	52.0638	5048	5048	MS2	16/22	Plasma_iTRAQ_3.raw
																gi105990532	yGmVAQVTQTLk	1	1	HCD	N-Term(iTRAQ4plex), M3(Oxidation), K12(iTRAQ4plex)	35.282	4.56985	1	1	17734	Unique	Used	0.764573	2	821.961	1642.92	4.50076	35.5036	3161	3161	MS2	16/22	Plasma_iTRAQ_3.raw
																gi105990532	yGMVAQVTQTLk	1	1	HCD	N-Term(iTRAQ4plex), K12(iTRAQ4plex)	11.0751	3.99515	1	1	19286	Unique	Used	1.14056	2	813.966	1626.92	7.27191	50.6276	4855	4855	MS2	16/22	Plasma_iTRAQ_2.raw
gi105990535	F5	2153	coagulation factor V precursor	2224	251.5	10.25	30	19	1.332	5.02	S		Extracellular	Metal ion binding;	Protein metabolism;
																gi105990535	aEVDDVIQVR	1	1	HCD	N-Term(iTRAQ4plex)	24.2786	4.20696	1	1	16327	Unique	Used	1.30356	2	644.356	1287.7	0.95414	35.6535	3111	3111	MS2	17/18	Plasma_iTRAQ_1.raw
																gi105990535	aEVDDVIQVR	1	1	HCD	N-Term(iTRAQ4plex)	25.9676	3.89165	1	1	14379	Unique	Used	1.13883	2	644.357	1287.71	3.51365	34.4202	2968	2968	MS2	16/18	Plasma_iTRAQ_4.raw
																gi105990535	aVQPGETYTYk	1	1	HCD	N-Term(iTRAQ4plex), K11(iTRAQ4plex)	54.1728	4.18137	1	1	16199	Unique	Used	1.67019	2	772.916	1544.83	3.46033	21.9582	1491	1491	MS2	14/20	Plasma_iTRAQ_3.raw
																gi105990535	aVQPGETYTYk	1	1	HCD	N-Term(iTRAQ4plex), K11(iTRAQ4plex)	45.9958	4.08722	1	1	13096	Unique	Used	1.47209	2	772.914	1544.82	0.457619	22.5517	1578	1578	MS2	15/20	Plasma_iTRAQ_4.raw
																gi105990535	dGTDYIEIIPk	1	1	HCD	N-Term(iTRAQ4plex), K11(iTRAQ4plex)	26.3663	3.39611	1	1	19100	Unique	Used	1.41317	2	776.43	1551.85	0.623087	48.8007	4651	4651	MS2	13/20	Plasma_iTRAQ_2.raw
																gi105990535	eDGILGPIIR	1	1	HCD	N-Term(iTRAQ4plex)	14.8895	3.82595	1	1	18011	Unique	Used	1.49359	2	613.865	1226.72	-0.28428	51.7496	4930	4930	MS2	16/18	Plasma_iTRAQ_1.raw
																gi105990535	eDGILGPIIR	1	1	HCD	N-Term(iTRAQ4plex)	9.83991	3.40756	1	1	18972	Unique	Used	1.29305	2	613.867	1226.73	2.60148	47.7126	4513	4513	MS2	14/18	Plasma_iTRAQ_2.raw
																gi105990535	eDGILGPIIR	1	1	HCD	N-Term(iTRAQ4plex)	10.3603	3.31811	1	1	16065	Unique	Used	1.36849	2	613.866	1226.73	2.20345	51.9108	4811	4811	MS2	15/18	Plasma_iTRAQ_4.raw
																gi105990535	eFNPLVIVGLSk	1	1	HCD	N-Term(iTRAQ4plex), K12(iTRAQ4plex)	72.149	5.39529	1	1	17576	Unique	Used	1.45247	2	802.487	1603.97	0.549459	72.2888	6641	6641	MS2	18/22	Plasma_iTRAQ_5.raw
																gi105990535	eFNPLVIVGLSk	1	1	HCD	N-Term(iTRAQ4plex), K12(iTRAQ4plex)	59.6919	4.43571	1	1	17550	Unique	Used	1.36913	3	535.329	1603.97	3.73748	71.9623	6612	6612	MS2	23/44	Plasma_iTRAQ_5.raw
																gi105990535	ekPQSTISGLLGPTLYAEVGDIIk	1	1	HCD	N-Term(iTRAQ4plex), K2(iTRAQ4plex), K24(iTRAQ4plex)	92.8438	7.8723	1	1	17863	Unique	Used	1.1894	3	987.902	2961.69	1.36039	72.4153	6788	6788	MS2	30/92	Plasma_iTRAQ_6.raw
																gi105990535	eTDIEDSDDIPEDTTYkk	1	1	HCD	N-Term(iTRAQ4plex), K17(iTRAQ4plex), K18(iTRAQ4plex)	84.3457	5.46744	1	1	14008	Unique	Used	1.22022	3	849.415	2546.23	-1.77672	29.1509	2175	2175	MS2	27/68	Plasma_iTRAQ_6.raw
																gi105990535	fTVNNLAEPQk	1	1	HCD	N-Term(iTRAQ4plex), K11(iTRAQ4plex)	56.8879	5.24295	1	1	17582	Unique	Used	1.44638	2	774.935	1548.86	0.0898252	34.1976	2998	2998	MS2	19/20	Plasma_iTRAQ_3.raw
																gi105990535	fTVnNLAEPQk	1	1	HCD	N-Term(iTRAQ4plex), N4(Deamidated), K11(iTRAQ4plex)	24.7664	5.24021	1	1	17629	Unique	Used	1.31756	2	775.428	1549.85	0.872743	35.2718	3051	3051	MS2	18/20	Plasma_iTRAQ_2.raw
																gi105990535	fTVnNLAEPQk	1	1	HCD	N-Term(iTRAQ4plex), N4(Deamidated), K11(iTRAQ4plex)	38.7819	4.36289	1	1	17617	Unique	Used	1.17954	2	775.428	1549.85	1.18779	34.5402	3036	3036	MS2	17/20	Plasma_iTRAQ_3.raw
																gi105990535	gEYEEHLGILGPIIR	1	1	HCD	N-Term(iTRAQ4plex)	80.1693	6.09349	1	1	16152	Unique	Used	1.29921	2	920.51	1840.01	1.79571	55.0748	4993	4993	MS2	22/28	Plasma_iTRAQ_5.raw
																gi105990535	lAAALGIR	1	1	HCD	N-Term(iTRAQ4plex)	4.1488	3.28977	1	1	15241	Unique	Used	1.37847	2	464.807	928.606	-0.0642576	43.3966	3908	3908	MS2	13/14	Plasma_iTRAQ_4.raw
																gi105990535	lAAALGIR	1	1	HCD	N-Term(iTRAQ4plex)	28.4426	3.22494	1	1	17963	Unique	Used	1.3737	1	928.605	928.605	-0.838511	37.4419	3409	3409	MS2	13/14	Plasma_iTRAQ_3.raw
																gi105990535	lLSLGAGEFk	1	1	HCD	N-Term(iTRAQ4plex), K10(iTRAQ4plex)	24.1348	4.24507	1	1	16033	Unique	Used	2.18131	2	661.9	1322.79	-0.164435	53.8157	4857	4857	MS2	17/18	Plasma_iTRAQ_5.raw
																gi105990535	lSEGASYLDHTFPAEk	1	1	HCD	N-Term(iTRAQ4plex), K16(iTRAQ4plex)	80.1467	6.82894	1	1	15170	Unique	Used	1.23742	2	1027.04	2053.06	7.15733	40.3823	3493	3493	MS2	23/30	Plasma_iTRAQ_6.raw
																gi105990535	lSEGASYLDHTFPAEk	1	1	HCD	N-Term(iTRAQ4plex), K16(iTRAQ4plex)	16.0404	4.64692	1	1	15163	Unique	Used	1.38044	3	685.024	2053.06	5.24814	40.3422	3486	3486	MS2	20/60	Plasma_iTRAQ_6.raw
																gi105990535	nFFNPPIISR	1	1	HCD	N-Term(iTRAQ4plex)	3.92249	3.79983	1	1	19498	Unique	Used	1.16718	2	674.88	1348.75	2.08383	52.5456	5106	5106	MS2	12/18	Plasma_iTRAQ_3.raw
																gi105990535	nFFNPPIISR	1	1	HCD	N-Term(iTRAQ4plex)	3.48597	3.6381	1	1	19595	Unique	Used	1.42146	2	674.879	1348.75	1.45028	53.4447	5212	5212	MS2	13/18	Plasma_iTRAQ_3.raw
																gi105990535	qITASSFk	1	1	HCD	N-Term(iTRAQ4plex), K8(iTRAQ4plex)	32.1086	3.26611	1	1	13257	Unique	Used	1.32347	2	585.342	1169.68	0.468901	23.9303	1751	1751	MS2	13/14	Plasma_iTRAQ_4.raw
																gi105990535	sEAYnTFSER	1	1	HCD	N-Term(iTRAQ4plex), N5(Deamidated)	24.9688	3.94636	1	1	14706	Unique	Used	1.13054	2	674.811	1348.61	0.849362	21.3372	1364	1364	MS2	15/18	Plasma_iTRAQ_1.raw
																gi105990535	sEAYNTFSER	1	1	HCD	N-Term(iTRAQ4plex)	21.4325	3.88554	1	1	14834	Unique	Used	1.27258	2	674.321	1347.63	3.66335	22.3283	1501	1501	MS2	15/18	Plasma_iTRAQ_1.raw
																gi105990535	sLSSEMYVk	1	1	HCD	N-Term(iTRAQ4plex), K9(iTRAQ4plex)	49.6896	3.33766	1	1	16743	Unique	Used	1.26708	2	666.357	1331.71	-3.83162	26.5008	2080	2080	MS2	15/16	Plasma_iTRAQ_3.raw
																gi105990535	sSSPELSEMLEYDR	1	1	HCD	N-Term(iTRAQ4plex)	69.0022	5.15587	1	1	18310	Unique	Used	1.25485	2	893.92	1786.83	2.13829	54.3565	5250	5250	MS2	22/26	Plasma_iTRAQ_1.raw
																gi105990535	vMYTQYEDESFTk	1	1	HCD	N-Term(iTRAQ4plex), K13(iTRAQ4plex)	82.9667	6.14986	1	1	18725	Unique	Used	1.46332	2	964.964	1928.92	1.1161	44.9513	4253	4253	MS2	21/24	Plasma_iTRAQ_3.raw
																gi105990535	yLDSTFTk	1	1	HCD	N-Term(iTRAQ4plex), K8(iTRAQ4plex)	5.73209	3.24712	1	1	17556	Unique	Used	1.40234	2	631.848	1262.69	0.847913	33.9774	2970	2970	MS2	13/14	Plasma_iTRAQ_3.raw
gi10835095	SAA4	6291	serum amyloid A-4 protein precursor	130	14.8	20	4	2	1.524	7.47524	S		Extracellular	Transporter activity;	Transport;
																gi10835095	aYWDIMISNHQnSNR	1	1	HCD	N-Term(iTRAQ4plex), N12(Deamidated)	52.0894	6.96085	1	1	15891	Unique	Used	1.61889	3	665.32	1993.95	7.48342	52.3851	4698	4698	MS2	29/56	Plasma_iTRAQ_5.raw
																gi10835095	eALQGVGDMGR	1	1	HCD	N-Term(iTRAQ4plex)	24.0732	3.84351	1	1	15242	Unique	Used	1.31296	2	638.828	1276.65	3.48145	25.6935	1938	1938	MS2	17/20	Plasma_iTRAQ_1.raw
																gi10835095	eALQGVGDMGR	1	1	HCD	N-Term(iTRAQ4plex)	26.9741	3.79029	1	1	15323	Unique	Used	1.571	2	638.828	1276.65	3.1946	26.5085	2026	2026	MS2	17/20	Plasma_iTRAQ_1.raw
																gi10835095	eALQGVGDMGR	1	1	HCD	N-Term(iTRAQ4plex)	22.7944	3.76045	1	1	15408	Unique	Used	1.39775	2	638.827	1276.65	2.52528	27.3826	2121	2121	MS2	17/20	Plasma_iTRAQ_1.raw
gi10835248	REG1B	5968	regenerating islet-derived 1 beta precursor	166	18.7	6.63	2	1	1.77	3.69376	S		Extracellular	Molecular function unknown;	Cell communication; Signal transduction;
																gi10835248	iScPEGTnAYR	2	1	HCD	N-Term(iTRAQ4plex), C3(Methylthio), N8(Deamidated)	30.1103	5.2663	1	1	16797	Unique	Used	1.79617	2	701.317	1401.63	0.581669	40.4117	3625	3625	MS2	15/20	Plasma_iTRAQ_1.raw
																gi10835248	iScPEGTNAYR	2	1	HCD	N-Term(iTRAQ4plex), C3(Methylthio)	17.4384	3.68575	1	1	16711	Unique	Used	1.83619	2	700.826	1400.64	1.28445	39.5055	3532	3532	MS2	13/20	Plasma_iTRAQ_1.raw
gi110611233	COL18A1	80781	alpha 1 type XVIII collagen isoform 2 precursor	1336	135.4	1.27	1	1	1.077		S		Extracellular	Extracellular matrix structural constituent;	Cell growth and/or maintenance;
																gi110611233	tEAPSATGQASSLLGGR	3	1	HCD	N-Term(iTRAQ4plex)	110.459	6.50197	1	1	16281	Unique	Used	1.07652	2	873.961	1746.91	2.58068	35.212	3061	3061	MS2	24/32	Plasma_iTRAQ_1.raw
gi110611237	F13B	2165	coagulation factor XIII B chain precursor	661	75.5	40.39	57	19	1.387	11.8948	S		Extracellular	Transferase activity;	Protein metabolism;
																gi110611237	cFDHHFLEGSR	1	1	HCD	N-Term(iTRAQ4plex), C1(Methylthio)	39.905	3.83573	1	1	11334	Unique	Used	2.04426	4	385.178	1537.69	7.77516	27.3044	1916	1916	MS2	21/60	Plasma_iTRAQ_7.raw
																gi110611237	cNEYYLLR	1	1	HCD	N-Term(iTRAQ4plex), C1(Methylthio)	30.7568	3.47264	1	1	18994	Unique	Used	1.58645	2	632.303	1263.6	0.634159	47.906	4537	4537	MS2	13/14	Plasma_iTRAQ_2.raw
																gi110611237	cPPPPLPINSk	1	1	HCD	N-Term(iTRAQ4plex), C1(Methylthio), K11(iTRAQ4plex)	31.3899	3.92766	1	1	15314	Unique	Used	1.828	3	499.612	1496.82	-0.0570788	44.2174	3989	3989	MS2	16/40	Plasma_iTRAQ_4.raw
																gi110611237	cPPPPLPINSk	1	1	HCD	N-Term(iTRAQ4plex), C1(Methylthio), K11(iTRAQ4plex)	13.1032	3.07787	1	1	15341	Unique	Used	1.95572	2	748.915	1496.82	1.90917	44.5073	4018	4018	MS2	13/20	Plasma_iTRAQ_4.raw
																gi110611237	cPPPPLPINSk	1	1	HCD	N-Term(iTRAQ4plex), C1(Methylthio), K11(iTRAQ4plex)	26.1691	2.89063	1	1	12301	Unique	Used	1.06554	2	748.916	1496.82	2.7247	37.47	3059	3059	MS2	10/20	Plasma_iTRAQ_7.raw
																gi110611237	cTkPDLSnGYISDVk	1	1	HCD	C1(Methylthio), N-Term(iTRAQ4plex), K3(iTRAQ4plex), N8(Deamidated), K15(iTRAQ4plex)	61.853	6.02267	1	1	15006	Unique	Used	1.51496	3	707.035	2119.09	6.03036	38.7438	3305	3305	MS2	27/56	Plasma_iTRAQ_6.raw
																gi110611237	cTkPDLSnGYISDVk	1	1	HCD	C1(Methylthio), N-Term(iTRAQ4plex), K3(iTRAQ4plex), N8(Deamidated), K15(iTRAQ4plex)	58.3629	5.97218	1	1	15416	Unique	Used	1.5343	3	707.03	2119.08	-1.14147	45.3092	4100	4100	MS2	28/56	Plasma_iTRAQ_4.raw
																gi110611237	cTkPDLSnGYISDVk	1	1	HCD	C1(Methylthio), N-Term(iTRAQ4plex), K3(iTRAQ4plex), N8(Deamidated), K15(iTRAQ4plex)	43.7416	5.07879	1	1	14970	Unique	Used	1.82257	2	1060.05	2119.09	7.99526	38.2866	3261	3261	MS2	21/28	Plasma_iTRAQ_6.raw
																gi110611237	gDTYPAELYITGSILR	1	1	HCD	N-Term(iTRAQ4plex)	53.8286	5.72097	1	1	19775	Unique	Used	1.32167	2	957.011	1913.01	0.257946	69.3759	6832	6832	MS2	23/30	Plasma_iTRAQ_1.raw
																gi110611237	gDTYPAELyITGSILR	1	1	HCD	N-Term(iTRAQ4plex), Y9(iTRAQ4plex)	60.953	5.56655	1	1	16290	Unique	Used	1.01472	3	686.378	2057.12	1.23619	56.5834	5150	5150	MS2	24/60	Plasma_iTRAQ_5.raw
																gi110611237	gDTYPAELYITGSILR	1	1	HCD	N-Term(iTRAQ4plex)	58.1625	5.54346	1	1	19859	Unique	Used	1.41823	2	957.011	1913.01	0.640809	70.3023	6924	6924	MS2	21/30	Plasma_iTRAQ_1.raw
																gi110611237	gDTYPAELYITGSILR	1	1	HCD	N-Term(iTRAQ4plex)	59.7514	5.3502	1	1	19703	Unique	Used	1.37395	2	957.011	1913.01	0.449378	68.5389	6753	6753	MS2	22/30	Plasma_iTRAQ_1.raw
																gi110611237	gDTYPAELYITGSILR	1	1	HCD	N-Term(iTRAQ4plex)	63.272	5.30365	1	1	19870	Unique	Used	1.79352	3	638.343	1913.01	0.410444	70.4369	6936	6936	MS2	24/60	Plasma_iTRAQ_1.raw
																gi110611237	gDTYPAELYITGSILR	1	1	HCD	N-Term(iTRAQ4plex)	42.523	5.1664	1	1	19939	Unique	Used	1.27587	2	957.011	1913.01	0.130325	71.2385	7012	7012	MS2	24/30	Plasma_iTRAQ_1.raw
																gi110611237	gDTYPAELYITGSILR	1	1	HCD	N-Term(iTRAQ4plex)	33.9682	5.13875	1	1	19720	Unique	Used	1.48456	3	638.345	1913.02	3.66476	68.7333	6772	6772	MS2	21/60	Plasma_iTRAQ_1.raw
																gi110611237	gDTYPAELYITGSILR	1	1	HCD	N-Term(iTRAQ4plex)	45.5365	4.62765	1	1	19793	Unique	Used	1.16742	3	638.343	1913.01	0.314728	69.5629	6852	6852	MS2	24/60	Plasma_iTRAQ_1.raw
																gi110611237	gDTYPAELYITGSILR	1	1	HCD	N-Term(iTRAQ4plex)	34.7334	4.26688	1	1	20063	Unique	Used	1.4595	2	957.009	1913.01	-1.52875	72.6638	7147	7147	MS2	14/30	Plasma_iTRAQ_1.raw
																gi110611237	gMcTSPPLIk	1	1	HCD	N-Term(iTRAQ4plex), C3(Methylthio), K10(iTRAQ4plex)	38.9682	4.40308	1	1	15136	Unique	Used	1.67483	2	690.869	1380.73	0.85895	43.7173	3816	3816	MS2	15/18	Plasma_iTRAQ_5.raw
																gi110611237	gMcTSPPLIk	1	1	HCD	N-Term(iTRAQ4plex), C3(Methylthio), K10(iTRAQ4plex)	36.0476	4.05901	1	1	15546	Unique	Used	0.851788	2	690.869	1380.73	1.12418	46.6277	4242	4242	MS2	14/18	Plasma_iTRAQ_4.raw
																gi110611237	gmcTSPPLIk	1	1	HCD	N-Term(iTRAQ4plex), M2(Oxidation), C3(Methylthio), K10(iTRAQ4plex)	37.6707	3.50915	1	1	13884	Unique	Used	1.42534	2	698.868	1396.73	2.74182	30.0781	2385	2385	MS2	14/18	Plasma_iTRAQ_5.raw
																gi110611237	hPPVVmnGAVADGILASYATGSSVEYR	1	1	HCD	N-Term(iTRAQ4plex), M6(Oxidation), N7(Deamidated)	97.1118	7.28055	1	1	16596	Unique	Used	4.72729	3	974.819	2922.44	-0.113766	60.0314	5499	5499	MS2	32/104	Plasma_iTRAQ_5.raw
																gi110611237	hPPVVmnGAVADGILASYATGSSVEYR	1	1	HCD	N-Term(iTRAQ4plex), M6(Oxidation), N7(Deamidated)	11.2085	5.31707	1	1	15914	Unique	Used	0.666227	3	974.822	2922.45	2.83101	52.5872	4723	4723	MS2	18/104	Plasma_iTRAQ_5.raw
																gi110611237	iAQYyYTFk	1	1	HCD	N-Term(iTRAQ4plex), Y5(iTRAQ4plex), K9(iTRAQ4plex)	16.2538	3.83759	1	1	11882	Unique	Used	1.09046	2	814.965	1628.92	10.7928	32.9125	2559	2559	MS2	14/16	Plasma_iTRAQ_7.raw
																gi110611237	iAQYYYTFk	1	1	HCD	N-Term(iTRAQ4plex), K9(iTRAQ4plex)	37.9181	3.54877	1	1	13052	Unique	Used	1.082	2	742.908	1484.81	4.36716	46.4704	3985	3985	MS2	14/16	Plasma_iTRAQ_7.raw
																gi110611237	lIEnGYFHPVk	1	1	HCD	N-Term(iTRAQ4plex), N4(Deamidated), K11(iTRAQ4plex)	46.087	5.08737	1	1	14727	Unique	Used	1.2592	2	803.443	1605.88	-5.13552	35.9706	2987	2987	MS2	17/20	Plasma_iTRAQ_6.raw
																gi110611237	lIEnGYFHPVk	1	1	HCD	N-Term(iTRAQ4plex), N4(Deamidated), K11(iTRAQ4plex)	55.5441	4.68251	1	1	14809	Unique	Used	1.16554	3	535.972	1605.9	8.04453	36.8161	3082	3082	MS2	21/40	Plasma_iTRAQ_6.raw
																gi110611237	lIEnGyFHPVk	1	1	HCD	N-Term(iTRAQ4plex), N4(Deamidated), Y6(iTRAQ4plex), K11(iTRAQ4plex)	22.1749	4.41956	1	1	11495	Unique	Used	1.2051	2	875.505	1750	7.83622	28.8758	2102	2102	MS2	17/20	Plasma_iTRAQ_7.raw
																gi110611237	lIEnGYFHPVk	1	1	HCD	N-Term(iTRAQ4plex), N4(Deamidated), K11(iTRAQ4plex)	43.4163	4.07042	1	1	14707	Unique	Used	1.31026	3	535.963	1605.87	-8.26052	35.828	2966	2966	MS2	20/40	Plasma_iTRAQ_6.raw
																gi110611237	lIEnGYFHPVk	1	1	HCD	N-Term(iTRAQ4plex), N4(Deamidated), K11(iTRAQ4plex)	7.4069	3.97701	1	1	12278	Unique	Used	1.11323	3	535.967	1605.89	-1.5332	37.1783	3030	3030	MS2	16/40	Plasma_iTRAQ_7.raw
																gi110611237	lIEnGYFHPVk	1	1	HCD	N-Term(iTRAQ4plex), N4(Deamidated), K11(iTRAQ4plex)	42.3405	3.72947	1	1	14860	Unique	Used	0.994913	2	803.454	1605.9	8.0149	37.2229	3137	3137	MS2	17/20	Plasma_iTRAQ_6.raw
																gi110611237	qEEQTTcTTEGWSPEPR	1	1	HCD	N-Term(iTRAQ4plex), C7(Methylthio)	99.2914	6.90611	1	1	14864	Unique	Used	1.84714	2	1084.97	2168.94	1.03271	39.5208	3496	3496	MS2	26/32	Plasma_iTRAQ_4.raw
																gi110611237	qGYDLSPLTPLSELSVQcNR	1	1	HCD	N-Term(iTRAQ4plex), C18(Methylthio)	86.0724	6.26619	1	1	20344	Unique	Used	1.14893	3	804.068	2410.19	1.41779	75.995	7457	7457	MS2	28/76	Plasma_iTRAQ_1.raw
																gi110611237	qGYDLSPLTPLSELSVQcNR	1	1	HCD	N-Term(iTRAQ4plex), C18(Methylthio)	71.6915	6.00839	1	1	21577	Unique	Used	1.33427	3	804.068	2410.19	0.734052	72.0945	7355	7355	MS2	27/76	Plasma_iTRAQ_2.raw
																gi110611237	qSTLSYQEPLR	1	1	HCD	N-Term(iTRAQ4plex)	40.2209	4.59864	1	1	15584	Unique	Used	1.10565	2	733.394	1465.78	2.5999	29.0995	2313	2313	MS2	17/20	Plasma_iTRAQ_1.raw
																gi110611237	qSTLSYQEPLR	1	1	HCD	N-Term(iTRAQ4plex)	8.37712	4.31692	1	1	13683	Unique	Used	1.04211	2	733.394	1465.78	2.93302	28.0043	2219	2219	MS2	15/20	Plasma_iTRAQ_4.raw
																gi110611237	qSTLSYQEPLRT	1	1	HCD	N-Term(iTRAQ4plex)	11.6648	4.42326	1	1	15845	Unique	Used	1.18571	2	783.914	1566.82	-2.13284	31.3687	2593	2593	MS2	17/22	Plasma_iTRAQ_1.raw
																gi110611237	qSTLSYQEPLRT	1	1	HCD	N-Term(iTRAQ4plex)	1.03185	3.73293	1	1	15884	Unique	Used	1.22082	3	522.947	1566.83	0.390637	31.6879	2634	2634	MS2	11/44	Plasma_iTRAQ_1.raw
																gi110611237	sGYLLHGSNEITcNR	1	1	HCD	N-Term(iTRAQ4plex), C13(Methylthio)	88.8432	5.78965	1	1	14277	Unique	Used	1.5596	3	618.628	1853.87	-3.78231	34.0524	2825	2825	MS2	22/56	Plasma_iTRAQ_5.raw
																gi110611237	sGYLLHGSnEITcNR	1	1	HCD	N-Term(iTRAQ4plex), N9(Deamidated), C13(Methylthio)	79.9266	5.31614	1	1	14644	Unique	Used	1.38199	3	618.963	1854.87	7.76561	38.2442	3249	3249	MS2	22/56	Plasma_iTRAQ_5.raw
																gi110611237	sGYLLHGSNEITcNR	1	1	HCD	N-Term(iTRAQ4plex), C13(Methylthio)	95.0925	5.27737	1	1	14299	Unique	Used	1.63532	2	927.443	1853.88	1.78894	34.2802	2850	2850	MS2	21/28	Plasma_iTRAQ_5.raw
																gi110611237	sGYLLHGSnEITcNR	1	1	HCD	N-Term(iTRAQ4plex), N9(Deamidated), C13(Methylthio)	72.4914	5.27405	1	1	14633	Unique	Used	1.44097	3	618.953	1854.84	-8.62137	38.1483	3237	3237	MS2	21/56	Plasma_iTRAQ_5.raw
																gi110611237	sGYLLHGSNEITcNR	1	1	HCD	N-Term(iTRAQ4plex), C13(Methylthio)	60.666	5.07264	1	1	14397	Unique	Used	1.45774	3	618.625	1853.86	-8.62205	35.3685	2961	2961	MS2	25/56	Plasma_iTRAQ_5.raw
																gi110611237	sGYLLHGSnEITcNR	1	1	HCD	N-Term(iTRAQ4plex), N9(Deamidated), C13(Methylthio)	74.1517	5.00871	1	1	14660	Unique	Used	1.46159	2	927.942	1854.88	9.08905	38.3665	3266	3266	MS2	19/28	Plasma_iTRAQ_5.raw
																gi110611237	tTGGkDEEVVQcLSDGWSSQPTcR	1	1	HCD	N-Term(iTRAQ4plex), K5(iTRAQ4plex), C12(Methylthio), C23(Methylthio)	134.848	8.11711	1	1	16851	Unique	Used	1.68946	3	988.447	2963.33	0.988934	58.6847	5476	5476	MS2	30/92	Plasma_iTRAQ_6.raw
																gi110611237	vAcEEPPFIEnGAANLHSk	1	1	HCD	N-Term(iTRAQ4plex), C3(Methylthio), N11(Deamidated), K19(iTRAQ4plex)	107.161	8.03921	1	1	16167	Unique	Used	1.41268	3	787.721	2361.15	0.815252	53.0071	4921	4921	MS2	36/72	Plasma_iTRAQ_4.raw
																gi110611237	vAcEEPPFIEnGAANLHSk	1	1	HCD	N-Term(iTRAQ4plex), C3(Methylthio), N11(Deamidated), K19(iTRAQ4plex)	87.5483	7.61839	1	1	15945	Unique	Used	1.30748	3	787.721	2361.15	1.203	48.8332	4403	4403	MS2	34/72	Plasma_iTRAQ_6.raw
																gi110611237	vAcEEPPFIEnGAANLHSk	1	1	HCD	N-Term(iTRAQ4plex), C3(Methylthio), N11(Deamidated), K19(iTRAQ4plex)	101.718	7.52384	1	1	15794	Unique	Used	1.38755	3	787.722	2361.15	2.05604	47.2415	4227	4227	MS2	36/72	Plasma_iTRAQ_6.raw
																gi110611237	vAcEEPPFIEnGAANLHSk	1	1	HCD	N-Term(iTRAQ4plex), C3(Methylthio), N11(Deamidated), K19(iTRAQ4plex)	111.487	7.43122	1	1	16062	Unique	Used	1.30555	3	787.723	2361.16	3.99476	50.0598	4539	4539	MS2	35/72	Plasma_iTRAQ_6.raw
																gi110611237	vAcEEPPFIEnGAANLHSk	1	1	HCD	N-Term(iTRAQ4plex), C3(Methylthio), N11(Deamidated), K19(iTRAQ4plex)	136.005	5.62553	1	1	15805	Unique	Used	1.37246	2	1181.08	2361.16	4.2331	47.3621	4240	4240	MS2	21/36	Plasma_iTRAQ_6.raw
																gi110611237	vAcEEPPFIEnGAANLHSk	1	1	HCD	N-Term(iTRAQ4plex), C3(Methylthio), N11(Deamidated), K19(iTRAQ4plex)	1	4.98609	1	1	16554	Unique	Used	3.39963	3	787.721	2361.15	0.970351	57.0674	5342	5342	MS2	13/72	Plasma_iTRAQ_4.raw
																gi110611237	vLHGDLIDFVck	1	1	HCD	N-Term(iTRAQ4plex), C11(Methylthio), K12(iTRAQ4plex)	66.625	5.33045	1	1	14097	Unique	Used	1.44808	2	846.958	1692.91	2.14364	60.5154	5351	5351	MS2	20/22	Plasma_iTRAQ_7.raw
																gi110611237	vLHGDLIDFVck	1	1	HCD	N-Term(iTRAQ4plex), C11(Methylthio), K12(iTRAQ4plex)	56.066	4.47546	1	1	14084	Unique	Used	1.52224	3	564.974	1692.91	0.873828	60.2842	5332	5332	MS2	20/44	Plasma_iTRAQ_7.raw
																gi110611237	vQYEcATGYYTAGGk	1	1	HCD	N-Term(iTRAQ4plex), C5(Methylthio), K15(iTRAQ4plex)	98.5243	6.56206	1	1	18363	Unique	Used	1.55084	2	972.962	1944.92	4.38212	41.5643	3838	3838	MS2	23/28	Plasma_iTRAQ_2.raw
																gi110611237	vQYEcATGYYTAGGk	1	1	HCD	N-Term(iTRAQ4plex), C5(Methylthio), K15(iTRAQ4plex)	101.899	6.33842	1	1	18476	Unique	Used	1.66299	2	972.957	1944.91	-0.82728	42.6293	3982	3982	MS2	22/28	Plasma_iTRAQ_3.raw
																gi110611237	vQYEcATGYYTAGGk	1	1	HCD	N-Term(iTRAQ4plex), C5(Methylthio), K15(iTRAQ4plex)	104.994	5.81774	1	1	18592	Unique	Used	1.32288	2	972.956	1944.91	-0.890045	43.6783	4108	4108	MS2	21/28	Plasma_iTRAQ_3.raw
																gi110611237	vQYEcATGYYTAGGk	1	1	HCD	N-Term(iTRAQ4plex), C5(Methylthio), K15(iTRAQ4plex)	68.9555	4.22724	1	1	18559	Unique	Used	1.23303	3	648.974	1944.91	-0.269317	43.4145	4073	4073	MS2	17/56	Plasma_iTRAQ_3.raw
																gi110611237	wTLPPEcVENNEnck	1	1	HCD	N-Term(iTRAQ4plex), C7(Methylthio), N13(Deamidated), C14(Methylthio), K15(iTRAQ4plex)	35.1142	3.75472	1	1	20464	Unique	Used	1.60132	3	719.652	2156.94	2.22582	61.3946	6157	6157	MS2	18/56	Plasma_iTRAQ_3.raw
gi110815798	OVCH1	341350	ovochymase-1 precursor	1134	124.9	1.15	1	1	1.46		S		Extracellular	Serine-type peptidase activity;	Protein metabolism;
																gi110815798	aLSSVqEVNGSQR	1	1	HCD	N-Term(iTRAQ4plex), Q6(Deamidated)	10.8858	3.84542	1	1	21534	Unique	Used	1.46041	2	760.399	1519.79	4.45217	71.6914	7308	7308	MS2	14/24	Plasma_iTRAQ_2.raw
gi112380628	LAMP1	3916	lysosomal-associated membrane protein 1 precursor	417	44.9	2.16	1	1	1.023		S	T	Plasma membrane	Molecular function unknown;	Biological_process unknown;
																gi112380628	tVESITDIR	1	1	HCD	N-Term(iTRAQ4plex)	1.19141	3.15264	1	1	14335	Unique	Used	1.02286	2	589.332	1177.66	1.92041	33.9369	2919	2919	MS2	11/16	Plasma_iTRAQ_4.raw
gi11321561	HPX	3263	hemopexin precursor	462	51.6	69.48	1007	27	1.511	9.18184	S		Extracellular	Transporter activity;	Transport;
																gi11321561	aLPQPQnVTSLLGcTH	1	1	HCD	N-Term(iTRAQ4plex), N7(Deamidated), C14(Methylthio)	91.4474	5.82759	1	1	17839	Unique	Used	1.54526	2	935.472	1869.94	2.25865	73.7857	6796	6796	MS2	19/30	Plasma_iTRAQ_4.raw
																gi11321561	aLPQPQNVTSLLGcTH	1	1	HCD	N-Term(iTRAQ4plex), C14(Methylthio)	78.6835	5.82535	1	1	17506	Unique	Used	1.44421	2	934.98	1868.95	2.06775	69.0143	6409	6409	MS2	19/30	Plasma_iTRAQ_4.raw
																gi11321561	aLPQPQnVTSLLGcTH	1	1	HCD	N-Term(iTRAQ4plex), N7(Deamidated), C14(Methylthio)	86.5317	5.31929	1	1	17653	Unique	Used	1.32832	2	935.47	1869.93	0.626636	71.1219	6582	6582	MS2	18/30	Plasma_iTRAQ_4.raw
																gi11321561	aLPQPQNVTSLLGcTH	1	1	HCD	N-Term(iTRAQ4plex), C14(Methylthio)	56.4163	4.53873	1	1	17502	Unique	Used	1.2604	3	623.654	1868.95	0.297055	68.9401	6404	6404	MS2	25/60	Plasma_iTRAQ_4.raw
																gi11321561	cSDGWSFDATTLDDnGTMLFFk	1	1	HCD	C1(Methylthio), N-Term(iTRAQ4plex), N15(Deamidated), K22(iTRAQ4plex)	300	7.77133	1	1	14055	Unique	Used	1.82347	3	936.082	2806.23	0.718716	76.5694	5167	5167	MS2	22/84	Plasma_iTRAQ_1_3.raw
																gi11321561	cSPHLVLSALTSDnHGATYAFSGTHYWR	1	1	HCD	N-Term(iTRAQ4plex), C1(Methylthio), N14(Deamidated)	114.705	8.84241	1	1	14030	Unique	Used	1.81636	4	821.387	3282.53	1.36009	59.6158	5264	5264	MS2	33/162	Plasma_iTRAQ_7.raw
																gi11321561	cSPHLVLSALTSDNHGATYAFSGTHYWR	1	1	HCD	N-Term(iTRAQ4plex), C1(Methylthio)	125.775	8.83519	1	1	13946	Unique	Used	2.06365	3	1094.52	3281.54	0.901802	58.3784	5149	5149	MS2	35/108	Plasma_iTRAQ_7.raw
																gi11321561	cSPHLVLSALTSDNHGATYAFSGTHYWR	1	1	HCD	N-Term(iTRAQ4plex), C1(Methylthio)	101.302	8.24063	1	1	13914	Unique	Used	100	5	657.114	3281.54	1.43299	57.9675	5108	5108	MS2	37/216	Plasma_iTRAQ_7.raw
																gi11321561	cSPHLVLSALTSDNHGATYAFSGTHYWR	1	1	HCD	N-Term(iTRAQ4plex), C1(Methylthio)	119.476	8.10181	1	1	13990	Unique	Used	3.13781	4	821.141	3281.54	1.39989	59.0446	5210	5210	MS2	43/162	Plasma_iTRAQ_7.raw
																gi11321561	cSPHLVLSALTSDNHGATYAFSGTHYWR	1	1	HCD	N-Term(iTRAQ4plex), C1(Methylthio)	124.599	8.01115	1	1	13906	Unique	Used	2.20836	4	821.144	3281.55	4.599	57.8398	5097	5097	MS2	45/162	Plasma_iTRAQ_7.raw
																gi11321561	cSPHLVLSALTSDNHGATYAFSGTHYWR	1	1	HCD	N-Term(iTRAQ4plex), C1(Methylthio)	138.116	7.86854	1	1	9333	Unique	Used	5.28903	5	657.115	3281.55	3.10695	64.3267	4579	4579	MS2	29/216	Plasma_iTRAQ_8.raw
																gi11321561	cSPHLVLSALTSDNHGATYAFSGTHYWR	1	1	HCD	N-Term(iTRAQ4plex), C1(Methylthio)	135.168	7.63974	1	1	13999	Unique	Used	96.4125	5	657.113	3281.54	0.0380284	59.1729	5222	5222	MS2	39/216	Plasma_iTRAQ_7.raw
																gi11321561	cSPHLVLSALTSDNHGATYAFSGTHYWR	1	1	HCD	N-Term(iTRAQ4plex), C1(Methylthio)	129.603	7.40136	1	1	14894	Unique	Used	3.87383	5	657.113	3281.53	-0.984948	74.6502	6533	6533	MS2	35/216	Plasma_iTRAQ_7.raw
																gi11321561	cSPHLVLSALTSDnHGATYAFSGTHYWR	1	1	HCD	N-Term(iTRAQ4plex), C1(Methylthio), N14(Deamidated)	119.326	6.59137	1	1	14039	Unique	Used	3.22126	5	657.312	3282.53	3.06663	59.7372	5276	5276	MS2	40/216	Plasma_iTRAQ_7.raw
																gi11321561	dVRDYFMPcPGR	1	1	HCD	N-Term(iTRAQ4plex), C9(Methylthio)	49.3916	4.27671	1	1	16098	Unique	Used	0.468613	3	549.253	1645.74	2.19385	50.388	4579	4579	MS2	18/44	Plasma_iTRAQ_6.raw
																gi11321561	dYFMPcPGR	1	1	HCD	N-Term(iTRAQ4plex), C6(Methylthio)	35.8806	3.59624	1	1	11711	Unique	Used	1.7045	2	638.276	1275.54	0.271172	58.1416	3808	3808	MS2	12/16	Plasma_iTRAQ_4_6.raw
																gi11321561	dYFMPcPGR	1	1	HCD	N-Term(iTRAQ4plex), C6(Methylthio)	39.4276	3.51271	1	1	13963	Unique	Used	1.62951	2	638.277	1275.55	1.80238	75.3345	5064	5064	MS2	12/16	Plasma_iTRAQ_1_3.raw
																gi11321561	dYFMPcPGR	1	1	HCD	N-Term(iTRAQ4plex), C6(Methylthio)	40.6754	3.49884	1	1	15912	Unique	Used	1.53213	2	638.276	1275.55	1.03678	52.5708	4721	4721	MS2	12/16	Plasma_iTRAQ_5.raw
																gi11321561	dYFMPcPGR	1	1	HCD	N-Term(iTRAQ4plex), C6(Methylthio)	31.7194	3.48379	1	1	16435	Unique	Used	1.66996	2	638.276	1275.55	0.749675	55.8091	5213	5213	MS2	12/16	Plasma_iTRAQ_4.raw
																gi11321561	dYFMPcPGR	1	1	HCD	N-Term(iTRAQ4plex), C6(Methylthio)	44.291	3.36971	1	1	14203	Unique	Used	1.66138	2	638.276	1275.54	0.175472	79.2559	5349	5349	MS2	12/16	Plasma_iTRAQ_1_3.raw
																gi11321561	dYFMPcPGR	1	1	HCD	N-Term(iTRAQ4plex), C6(Methylthio)	42.2806	3.31399	1	1	10763	Unique	Used	1.70326	2	638.276	1275.54	0.462573	25.0483	1558	1558	MS2	12/16	Plasma_iTRAQ_1_3.raw
																gi11321561	dYFMPcPGR	1	1	HCD	N-Term(iTRAQ4plex), C6(Methylthio)	56.3821	3.28924	1	1	16206	Unique	Used	1.8899	2	638.278	1275.55	3.71638	53.389	4963	4963	MS2	11/16	Plasma_iTRAQ_4.raw
																gi11321561	dYFMPcPGR	1	1	HCD	N-Term(iTRAQ4plex), C6(Methylthio)	36.6499	3.28435	1	1	14908	Unique	Used	1.70522	2	638.277	1275.55	1.41958	89.6858	6117	6117	MS2	11/16	Plasma_iTRAQ_1_3.raw
																gi11321561	dYFMPcPGR	1	1	HCD	N-Term(iTRAQ4plex), C6(Methylthio)	42.452	3.25214	1	1	13413	Unique	Used	1.61477	2	638.276	1275.54	-0.0159292	66.3624	4450	4450	MS2	11/16	Plasma_iTRAQ_1_3.raw
																gi11321561	dYFMPcPGR	1	1	HCD	N-Term(iTRAQ4plex), C6(Methylthio)	45.9156	3.24657	1	1	14454	Unique	Used	1.59057	2	638.275	1275.54	-0.590133	83.2036	5624	5624	MS2	11/16	Plasma_iTRAQ_1_3.raw
																gi11321561	dYFMPcPGR	1	1	HCD	N-Term(iTRAQ4plex), C6(Methylthio)	36.5352	3.24468	1	1	14841	Unique	Used	1.63902	2	638.276	1275.55	0.845375	88.5213	6039	6039	MS2	11/16	Plasma_iTRAQ_1_3.raw
																gi11321561	dYFMPcPGR	1	1	HCD	N-Term(iTRAQ4plex), C6(Methylthio)	42.395	3.23988	1	1	10363	Unique	Used	1.68642	2	638.276	1275.54	0.558274	18.7462	1121	1121	MS2	12/16	Plasma_iTRAQ_1_3.raw
																gi11321561	dYFMPcPGR	1	1	HCD	N-Term(iTRAQ4plex), C6(Methylthio)	30.2327	3.23916	1	1	14361	Unique	Used	1.74706	2	638.276	1275.55	1.22818	81.8242	5525	5525	MS2	12/16	Plasma_iTRAQ_1_3.raw
																gi11321561	dYFMPcPGR	1	1	HCD	N-Term(iTRAQ4plex), C6(Methylthio)	45.2888	3.23058	1	1	13010	Unique	Used	1.78922	2	638.276	1275.55	1.03678	60.0877	4012	4012	MS2	11/16	Plasma_iTRAQ_1_3.raw
																gi11321561	dYFMPcPGR	1	1	HCD	N-Term(iTRAQ4plex), C6(Methylthio)	51.5648	3.22222	1	1	12853	Unique	Used	1.80336	2	638.276	1275.54	0.0797713	57.659	3842	3842	MS2	12/16	Plasma_iTRAQ_1_3.raw
																gi11321561	dYFMPcPGR	1	1	HCD	N-Term(iTRAQ4plex), C6(Methylthio)	32.5967	3.22109	1	1	10845	Unique	Used	1.70576	2	638.275	1275.54	-1.26004	26.3386	1646	1646	MS2	11/16	Plasma_iTRAQ_1_3.raw
																gi11321561	dYFMPcPGR	1	1	HCD	N-Term(iTRAQ4plex), C6(Methylthio)	62.2285	3.20843	1	1	10277	Unique	Used	1.65271	2	638.276	1275.54	0.653974	17.458	1028	1028	MS2	11/16	Plasma_iTRAQ_1_3.raw
																gi11321561	dYFMPcPGR	1	1	HCD	N-Term(iTRAQ4plex), C6(Methylthio)	39.413	3.20516	1	1	13729	Unique	Used	1.64314	2	638.276	1275.55	1.03678	71.5669	4803	4803	MS2	12/16	Plasma_iTRAQ_1_3.raw
																gi11321561	dYFMPcPGR	1	1	HCD	N-Term(iTRAQ4plex), C6(Methylthio)	60.208	3.19945	1	1	13089	Unique	Used	1.82472	2	638.276	1275.55	0.941076	61.2832	4097	4097	MS2	12/16	Plasma_iTRAQ_1_3.raw
																gi11321561	dYFMPcPGR	1	1	HCD	N-Term(iTRAQ4plex), C6(Methylthio)	39.5424	3.18078	1	1	14132	Unique	Used	1.72184	2	638.276	1275.55	0.749675	77.9049	5262	5262	MS2	12/16	Plasma_iTRAQ_1_3.raw
																gi11321561	dYFMPcPGR	1	1	HCD	N-Term(iTRAQ4plex), C6(Methylthio)	38.9479	3.17291	1	1	13891	Unique	Used	1.62363	2	638.276	1275.54	0.366873	74.1587	4983	4983	MS2	12/16	Plasma_iTRAQ_1_3.raw
																gi11321561	dYFMPcPGR	1	1	HCD	N-Term(iTRAQ4plex), C6(Methylthio)	41.2638	3.1644	1	1	10924	Unique	Used	1.60491	2	638.276	1275.54	0.462573	27.5958	1733	1733	MS2	11/16	Plasma_iTRAQ_1_3.raw
																gi11321561	dYFMPcPGR	1	1	HCD	N-Term(iTRAQ4plex), C6(Methylthio)	42.5089	3.16427	1	1	13205	Unique	Used	1.51775	2	638.275	1275.54	-0.398732	63.0927	4223	4223	MS2	12/16	Plasma_iTRAQ_1_3.raw
																gi11321561	dYFMPcPGR	1	1	HCD	N-Term(iTRAQ4plex), C6(Methylthio)	32.1332	3.16274	1	1	10681	Unique	Used	1.64474	2	638.276	1275.55	0.749675	23.7659	1469	1469	MS2	12/16	Plasma_iTRAQ_1_3.raw
																gi11321561	dYFMPcPGR	1	1	HCD	N-Term(iTRAQ4plex), C6(Methylthio)	46.7393	3.16036	1	1	10522	Unique	Used	1.69416	2	638.276	1275.54	0.653974	21.2421	1295	1295	MS2	12/16	Plasma_iTRAQ_1_3.raw
																gi11321561	dYFMPcPGR	1	1	HCD	N-Term(iTRAQ4plex), C6(Methylthio)	38.1487	3.14751	1	1	13811	Unique	Used	1.64987	2	638.276	1275.54	0.653974	72.8717	4894	4894	MS2	12/16	Plasma_iTRAQ_1_3.raw
																gi11321561	dYFMPcPGR	1	1	HCD	N-Term(iTRAQ4plex), C6(Methylthio)	70.8815	3.14168	1	1	10603	Unique	Used	1.66841	2	638.276	1275.54	0.271172	22.5329	1384	1384	MS2	12/16	Plasma_iTRAQ_1_3.raw
																gi11321561	dYFMPcPGR	1	1	HCD	N-Term(iTRAQ4plex), C6(Methylthio)	66.4581	3.1374	1	1	12932	Unique	Used	1.68228	2	638.276	1275.54	-0.303031	58.898	3928	3928	MS2	11/16	Plasma_iTRAQ_1_3.raw
																gi11321561	dYFMPcPGR	1	1	HCD	N-Term(iTRAQ4plex), C6(Methylthio)	48.6794	3.13274	1	1	10445	Unique	Used	1.73347	2	638.276	1275.55	0.941076	20.0105	1210	1210	MS2	12/16	Plasma_iTRAQ_1_3.raw
																gi11321561	dYFMPcPGR	1	1	HCD	N-Term(iTRAQ4plex), C6(Methylthio)	41.2063	3.12631	1	1	13654	Unique	Used	1.56718	2	638.276	1275.54	0.653974	70.3131	4719	4719	MS2	12/16	Plasma_iTRAQ_1_3.raw
																gi11321561	dYFMPcPGR	1	1	HCD	N-Term(iTRAQ4plex), C6(Methylthio)	39.0046	3.12013	1	1	13506	Unique	Used	1.69059	2	638.277	1275.55	1.51528	67.8688	4553	4553	MS2	12/16	Plasma_iTRAQ_1_3.raw
																gi11321561	dYFMPcPGR	1	1	HCD	N-Term(iTRAQ4plex), C6(Methylthio)	53.014	3.10701	1	1	12559	Unique	Used	1.55309	2	638.277	1275.55	1.89808	71.5972	4777	4777	MS2	12/16	Plasma_iTRAQ_4_6.raw
																gi11321561	dYFMPcPGR	1	1	HCD	N-Term(iTRAQ4plex), C6(Methylthio)	49.0273	3.10091	1	1	12647	Unique	Used	1.52648	2	638.276	1275.54	0.0797713	72.854	4874	4874	MS2	12/16	Plasma_iTRAQ_4_6.raw
																gi11321561	dYFMPcPGR	1	1	HCD	N-Term(iTRAQ4plex), C6(Methylthio)	41.7764	3.09214	1	1	11182	Unique	Used	1.65659	2	638.276	1275.54	0.653974	31.6276	2015	2015	MS2	12/16	Plasma_iTRAQ_1_3.raw
																gi11321561	dYFMPcPGR	1	1	HCD	N-Term(iTRAQ4plex), C6(Methylthio)	41.2638	3.06914	1	1	14973	Unique	Used	1.60085	2	638.276	1275.54	0.366873	90.8893	6197	6197	MS2	12/16	Plasma_iTRAQ_1_3.raw
																gi11321561	dYFMPcPGR	1	1	HCD	N-Term(iTRAQ4plex), C6(Methylthio)	46.2079	3.05065	1	1	13586	Unique	Used	1.62562	2	638.276	1275.55	1.03678	69.1575	4641	4641	MS2	12/16	Plasma_iTRAQ_1_3.raw
																gi11321561	dYFMPcPGR	1	1	HCD	N-Term(iTRAQ4plex), C6(Methylthio)	45.5739	3.04511	1	1	10195	Unique	Used	1.60421	2	638.276	1275.54	-0.11163	16.1836	937	937	MS2	11/16	Plasma_iTRAQ_1_3.raw
																gi11321561	dYFMPcPGR	1	1	HCD	N-Term(iTRAQ4plex), C6(Methylthio)	46.5643	2.98186	1	1	16227	Unique	Used	1.79516	1	1275.55	1275.55	1.47797	53.5932	4986	4986	MS2	11/16	Plasma_iTRAQ_4.raw
																gi11321561	dYFMPcPGR	1	1	HCD	N-Term(iTRAQ4plex), C6(Methylthio)	37.6537	2.8992	1	1	9438	Unique	Used	1.36222	2	638.276	1275.54	0.653974	19.1631	1121	1121	MS2	12/16	Plasma_iTRAQ_4_6.raw
																gi11321561	dYFMPcPGR	1	1	HCD	N-Term(iTRAQ4plex), C6(Methylthio)	26.2949	2.87889	1	1	15863	Unique	Used	1.61792	1	1275.55	1275.55	0.903767	47.9478	4307	4307	MS2	11/16	Plasma_iTRAQ_6.raw
																gi11321561	dYFMPcPGR	1	1	HCD	N-Term(iTRAQ4plex), C6(Methylthio)	35.0126	2.59475	1	1	13122	Unique	Used	1.54179	1	1275.54	1275.54	-0.0532378	47.2788	4070	4070	MS2	11/16	Plasma_iTRAQ_7.raw
																gi11321561	eVGTPHGIILDSVDAAFIcPGSSR	1	1	HCD	N-Term(iTRAQ4plex), C19(Methylthio)	78.0024	9.07856	1	1	17886	Unique	Used	1.23261	3	877.774	2631.31	1.7337	76.4299	7000	7000	MS2	31/92	Plasma_iTRAQ_5.raw
																gi11321561	eVGTPHGIILDSVDAAFIcPGSSR	1	1	HCD	N-Term(iTRAQ4plex), C19(Methylthio)	69.3186	9.05524	1	1	17133	Unique	Used	1.38392	3	877.774	2631.31	2.22081	66.6619	6129	6129	MS2	32/92	Plasma_iTRAQ_5.raw
																gi11321561	eVGTPHGIILDSVDAAFIcPGSSR	1	1	HCD	N-Term(iTRAQ4plex), C19(Methylthio)	86.4272	9.03278	1	1	17743	Unique	Used	1.13558	3	877.774	2631.31	1.52494	74.6538	6833	6833	MS2	34/92	Plasma_iTRAQ_5.raw
																gi11321561	eVGTPHGIILDSVDAAFIcPGSSR	1	1	HCD	N-Term(iTRAQ4plex), C19(Methylthio)	87.3056	8.67892	1	1	12939	Unique	Used	1.40132	3	877.775	2631.31	2.49916	76.8947	5212	5212	MS2	30/92	Plasma_iTRAQ_4_6.raw
																gi11321561	eVGTPHGIILDSVDAAFIcPGSSR	1	1	HCD	N-Term(iTRAQ4plex), C19(Methylthio)	86.7031	8.65471	1	1	12624	Unique	Used	1.33998	3	877.774	2631.31	2.2904	72.5504	4849	4849	MS2	32/92	Plasma_iTRAQ_4_6.raw
																gi11321561	eVGTPHGIILDSVDAAFIcPGSSR	1	1	HCD	N-Term(iTRAQ4plex), C19(Methylthio)	78.9738	8.59747	1	1	9570	Unique	Used	1.12759	3	877.775	2631.31	3.40379	70.9014	5006	5006	MS2	34/92	Plasma_iTRAQ_8.raw
																gi11321561	eVGTPHGIILDSVDAAFIcPGSSR	1	1	HCD	N-Term(iTRAQ4plex), C19(Methylthio)	75.0448	8.56874	1	1	17361	Unique	Used	1.88615	3	877.775	2631.31	2.98627	69.3904	6389	6389	MS2	32/92	Plasma_iTRAQ_5.raw
																gi11321561	eVGTPHGIILDSVDAAFIcPGSSR	1	1	HCD	N-Term(iTRAQ4plex), C19(Methylthio)	70.7253	8.51727	1	1	17035	Unique	Used	1.41626	3	877.774	2631.31	2.01205	65.3104	6009	6009	MS2	33/92	Plasma_iTRAQ_5.raw
																gi11321561	eVGTPHGIILDSVDAAFIcPGSSR	1	1	HCD	N-Term(iTRAQ4plex), C19(Methylthio)	66.9784	8.40369	1	1	11462	Unique	Used	1.26394	3	877.775	2631.31	2.63833	54.0044	3520	3520	MS2	32/92	Plasma_iTRAQ_4_6.raw
																gi11321561	eVGTPHGIILDSVDAAFIcPGSSR	1	1	HCD	N-Term(iTRAQ4plex), C19(Methylthio)	99.1534	8.35212	1	1	17451	Unique	Used	1.24978	3	877.774	2631.31	2.22081	70.6155	6498	6498	MS2	32/92	Plasma_iTRAQ_5.raw
																gi11321561	eVGTPHGIILDSVDAAFIcPGSSR	1	1	HCD	N-Term(iTRAQ4plex), C19(Methylthio)	88.2231	8.24434	1	1	17543	Unique	Used	1.46754	3	877.774	2631.31	1.66411	71.8948	6605	6605	MS2	32/92	Plasma_iTRAQ_5.raw
																gi11321561	eVGTPHGIILDSVDAAFIcPGSSR	1	1	HCD	N-Term(iTRAQ4plex), C19(Methylthio)	81.4941	8.23891	1	1	11692	Unique	Used	1.14386	3	877.773	2631.3	0.75948	57.8322	3787	3787	MS2	29/92	Plasma_iTRAQ_4_6.raw
																gi11321561	eVGTPHGIILDSVDAAFIcPGSSR	1	1	HCD	N-Term(iTRAQ4plex), C19(Methylthio)	86.5301	8.19396	1	1	17656	Unique	Used	1.28638	3	877.774	2631.31	1.52494	73.401	6732	6732	MS2	35/92	Plasma_iTRAQ_5.raw
																gi11321561	eVGTPHGIILDSVDAAFIcPGSSR	1	1	HCD	N-Term(iTRAQ4plex), C19(Methylthio)	74.0856	8.18739	1	1	11617	Unique	Used	1.2715	3	877.775	2631.31	2.98627	56.6007	3700	3700	MS2	29/92	Plasma_iTRAQ_4_6.raw
																gi11321561	eVGTPHGIILDSVDAAFIcPGSSR	1	1	HCD	N-Term(iTRAQ4plex), C19(Methylthio)	82.563	8.14796	1	1	17978	Unique	Used	1.51755	3	877.776	2631.31	4.03007	77.6327	7108	7108	MS2	32/92	Plasma_iTRAQ_5.raw
																gi11321561	eVGTPHGIILDSVDAAFIcPGSSR	1	1	HCD	N-Term(iTRAQ4plex), C19(Methylthio)	73.2674	8.11646	1	1	11533	Unique	Used	1.29636	3	877.775	2631.31	3.40379	55.1765	3602	3602	MS2	33/92	Plasma_iTRAQ_4_6.raw
																gi11321561	eVGTPHGIILDSVDAAFIcPGSSR	1	1	HCD	N-Term(iTRAQ4plex), C19(Methylthio)	72.2852	8.11231	1	1	17325	Unique	Used	1.60756	3	877.774	2631.31	1.31618	64.3471	6060	6060	MS2	28/92	Plasma_iTRAQ_6.raw
																gi11321561	eVGTPHGIILDSVDAAFIcPGSSR	1	1	HCD	N-Term(iTRAQ4plex), C19(Methylthio)	42.6376	7.93607	1	1	19126	Unique	Used	0.943865	3	877.776	2631.31	4.03007	89.882	8279	8279	MS2	28/92	Plasma_iTRAQ_6.raw
																gi11321561	eVGTPHGIILDSVDAAFIcPGSSR	1	1	HCD	N-Term(iTRAQ4plex), C19(Methylthio)	65.9986	7.91589	1	1	11785	Unique	Used	1.29623	3	877.776	2631.31	4.16924	59.2353	3889	3889	MS2	28/92	Plasma_iTRAQ_4_6.raw
																gi11321561	eVGTPHGIILDSVDAAFIcPGSSR	1	1	HCD	N-Term(iTRAQ4plex), C19(Methylthio)	42.6368	7.87246	1	1	13741	Unique	Used	1.09266	3	877.776	2631.31	4.03007	89.8347	6155	6155	MS2	28/92	Plasma_iTRAQ_4_6.raw
																gi11321561	eVGTPHGIILDSVDAAFIcPGSSR	1	1	HCD	N-Term(iTRAQ4plex), C19(Methylthio)	68.6873	7.39275	1	1	18967	Unique	Used	1.02327	3	877.774	2631.31	1.52494	89.3129	8189	8189	MS2	29/92	Plasma_iTRAQ_5.raw
																gi11321561	eVGTPHGIILDSVDAAFIcPGSSR	1	1	HCD	N-Term(iTRAQ4plex), C19(Methylthio)	97.719	7.10536	1	1	14413	Unique	Used	0.970354	3	877.774	2631.31	1.7337	65.8146	5807	5807	MS2	33/92	Plasma_iTRAQ_7.raw
																gi11321561	eVGTPHGIILDSVDAAFIcPGSSR	1	1	HCD	N-Term(iTRAQ4plex), C19(Methylthio)	51.4482	7.03268	1	1	11871	Unique	Used	0.93568	3	877.773	2631.31	1.177	60.6491	3988	3988	MS2	26/92	Plasma_iTRAQ_4_6.raw
																gi11321561	eVGTPHGIILDSVDAAFIcPGSSR	1	1	HCD	N-Term(iTRAQ4plex), C19(Methylthio)	49.891	6.84695	1	1	11335	Unique	Used	1.11285	3	877.773	2631.3	0.620305	51.8851	3372	3372	MS2	30/92	Plasma_iTRAQ_4_6.raw
																gi11321561	eVGTPHGIILDSVDAAFIcPGSSR	1	1	HCD	N-Term(iTRAQ4plex), C19(Methylthio)	122.073	6.73034	1	1	17367	Unique	Used	1.45233	2	1316.15	2631.3	-0.395199	69.4579	6396	6396	MS2	24/46	Plasma_iTRAQ_5.raw
																gi11321561	eVGTPHGIILDSVDAAFIcPGSSR	1	1	HCD	N-Term(iTRAQ4plex), C19(Methylthio)	65.8281	6.69222	1	1	11258	Unique	Used	0.908232	3	877.774	2631.31	1.24659	50.6152	3283	3283	MS2	27/92	Plasma_iTRAQ_4_6.raw
																gi11321561	eVGTPHGIILDSVDAAFIcPGSSR	1	1	HCD	N-Term(iTRAQ4plex), C19(Methylthio)	111.393	6.61847	1	1	17492	Unique	Used	1.48705	2	1316.15	2631.3	-0.11685	71.1795	6546	6546	MS2	22/46	Plasma_iTRAQ_5.raw
																gi11321561	eVGTPHGIILDSVDAAFIcPGSSR	1	1	HCD	N-Term(iTRAQ4plex), C19(Methylthio)	117.171	6.55168	1	1	17168	Unique	Used	1.5477	2	1316.16	2631.31	2.66664	67.0361	6168	6168	MS2	26/46	Plasma_iTRAQ_5.raw
																gi11321561	eVGTPHGIILDSVDAAFIcPGSSR	1	1	HCD	N-Term(iTRAQ4plex), C19(Methylthio)	87.4829	6.52895	1	1	17452	Unique	Used	1.33263	4	658.581	2631.3	0.197671	70.6187	6499	6499	MS2	28/138	Plasma_iTRAQ_5.raw
																gi11321561	eVGTPHGIILDSVDAAFIcPGSSR	1	1	HCD	N-Term(iTRAQ4plex), C19(Methylthio)	124.693	6.4008	1	1	17937	Unique	Used	1.49443	2	1316.16	2631.3	0.254283	77.0077	7057	7057	MS2	27/46	Plasma_iTRAQ_5.raw
																gi11321561	eVGTPHGIILDSVDAAFIcPGSSR	1	1	HCD	N-Term(iTRAQ4plex), C19(Methylthio)	54.0699	6.31885	1	1	19030	Unique	Used	0.504349	3	877.773	2631.31	0.829067	90.5855	8272	8272	MS2	28/92	Plasma_iTRAQ_5.raw
																gi11321561	eVGTPHGIILDSVDAAFIcPGSSR	1	1	HCD	N-Term(iTRAQ4plex), C19(Methylthio)	63.3245	6.26324	1	1	17565	Unique	Used	1.14556	4	658.584	2631.31	3.90898	72.1633	6629	6629	MS2	26/138	Plasma_iTRAQ_5.raw
																gi11321561	eVGTPHGIILDSVDAAFIcPGSSR	1	1	HCD	N-Term(iTRAQ4plex), C19(Methylthio)	97.1132	6.24426	1	1	17334	Unique	Used	1.56565	2	1316.15	2631.3	-0.302416	64.5158	6074	6074	MS2	21/46	Plasma_iTRAQ_6.raw
																gi11321561	eVGTPHGIILDSVDAAFIcPGSSR	1	1	HCD	N-Term(iTRAQ4plex), C19(Methylthio)	47.0591	6.21636	1	1	11145	Unique	Used	0.981752	3	877.771	2631.3	-1.67608	48.7469	3154	3154	MS2	25/92	Plasma_iTRAQ_4_6.raw
																gi11321561	eVGTPHGIILDSVDAAFIcPGSSR	1	1	HCD	N-Term(iTRAQ4plex), C19(Methylthio)	96.6706	6.19507	1	1	17362	Unique	Used	0.0104976	4	658.582	2631.31	1.58942	69.3936	6390	6390	MS2	31/138	Plasma_iTRAQ_5.raw
																gi11321561	eVGTPHGIILDSVDAAFIcPGSSR	1	1	HCD	N-Term(iTRAQ4plex), C19(Methylthio)	34.3721	5.4105	1	1	11065	Unique	Used	0.715689	3	877.777	2631.32	5.14346	47.3474	3058	3058	MS2	21/92	Plasma_iTRAQ_4_6.raw
																gi11321561	eVGTPHGIILDSVDAAFIcPGSSR	1	1	HCD	N-Term(iTRAQ4plex), C19(Methylthio)	65.7039	5.37332	1	1	18001	Unique	Used	0.853362	4	658.58	2631.3	-1.10129	77.9016	7135	7135	MS2	26/138	Plasma_iTRAQ_5.raw
																gi11321561	eVGTPHGIILDSVDAAFIcPGSSR	1	1	HCD	N-Term(iTRAQ4plex), C19(Methylthio)	78.4421	5.32263	1	1	17910	Unique	Used	84.7115	4	658.582	2631.3	0.661587	76.7051	7027	7027	MS2	28/138	Plasma_iTRAQ_5.raw
																gi11321561	eVGTPHGIILDSVDAAFIcPGSSR	1	1	HCD	N-Term(iTRAQ4plex), C19(Methylthio)	73.5898	4.99816	1	1	17063	Unique	Used	0.868516	4	658.581	2631.3	-0.451811	65.7043	6044	6044	MS2	29/138	Plasma_iTRAQ_5.raw
																gi11321561	eVGTPHGIILDSVDAAFIcPGSSR	1	1	HCD	N-Term(iTRAQ4plex), C19(Methylthio)	1	4.16247	1	1	10825	Unique	Used	0.648568	3	877.777	2631.32	5.21305	43.2144	2775	2775	MS2	19/92	Plasma_iTRAQ_4_6.raw
																gi11321561	eVGTPHGIILDSVDAAFIcPGSSR	1	1	HCD	N-Term(iTRAQ4plex), C19(Methylthio)	1	4.09675	1	1	16925	Unique	Used	1.34041	3	877.774	2631.31	1.45535	59.576	5566	5566	MS2	17/92	Plasma_iTRAQ_6.raw
																gi11321561	eWFWDLATGTMk	1	1	HCD	N-Term(iTRAQ4plex), K12(iTRAQ4plex)	59.5644	4.99753	1	1	17804	Unique	Used	2.28235	2	886.953	1772.9	3.27568	75.4654	6903	6903	MS2	17/22	Plasma_iTRAQ_5.raw
																gi11321561	eWFWDLATGTmk	1	1	HCD	N-Term(iTRAQ4plex), M11(Oxidation), K12(iTRAQ4plex)	27.8218	4.49788	1	1	17348	Unique	Used	2.0798	3	596.968	1788.89	1.50948	69.1746	6372	6372	MS2	19/44	Plasma_iTRAQ_5.raw
																gi11321561	eWFWDLATGTmk	1	1	HCD	N-Term(iTRAQ4plex), M11(Oxidation), K12(iTRAQ4plex)	17.0415	3.49006	1	1	17343	Unique	Used	2.00436	2	894.949	1788.89	2.40409	69.1095	6366	6366	MS2	16/22	Plasma_iTRAQ_5.raw
																gi11321561	fDPVRGEVPPR	1	1	HCD	N-Term(iTRAQ4plex)	8.38486	3.31421	1	1	13287	Unique	Used	0.961994	2	706.894	1412.78	2.36597	24.1614	1783	1783	MS2	12/20	Plasma_iTRAQ_4.raw
																gi11321561	gDkVWVYPPEk	1	1	HCD	N-Term(iTRAQ4plex), K3(iTRAQ4plex), K11(iTRAQ4plex)	17.0724	3.9366	1	1	11372	Unique	Used	0.764358	3	584.008	1750.01	10.4712	27.7238	1962	1962	MS2	18/40	Plasma_iTRAQ_7.raw
																gi11321561	gDkVWVYPPEk	1	1	HCD	N-Term(iTRAQ4plex), K3(iTRAQ4plex), K11(iTRAQ4plex)	20.9749	3.57955	1	1	11272	Unique	Used	0.731059	2	875.5	1749.99	1.06206	26.693	1845	1845	MS2	13/20	Plasma_iTRAQ_7.raw
																gi11321561	gEcQAEGVLFFQGDR	1	1	HCD	N-Term(iTRAQ4plex), C3(Methylthio)	35.6432	6.30262	1	1	13293	Unique	Used	2.30263	2	923.424	1845.84	1.9596	64.4972	4319	4319	MS2	22/28	Plasma_iTRAQ_1_3.raw
																gi11321561	gEcQAEGVLFFQGDR	1	1	HCD	N-Term(iTRAQ4plex), C3(Methylthio)	61.8797	6.27525	1	1	12820	Unique	Used	1.64083	2	923.427	1845.85	4.80328	75.4299	5073	5073	MS2	22/28	Plasma_iTRAQ_4_6.raw
																gi11321561	gEcQAEGVLFFQGDR	1	1	HCD	N-Term(iTRAQ4plex), C3(Methylthio)	70.5554	6.2175	1	1	13531	Unique	Used	2.12243	2	923.424	1845.84	1.89346	68.2843	4581	4581	MS2	22/28	Plasma_iTRAQ_1_3.raw
																gi11321561	gEcQAEGVLFFQGDR	1	1	HCD	N-Term(iTRAQ4plex), C3(Methylthio)	63.5983	6.1381	1	1	17942	Unique	Used	1.84991	2	923.423	1845.84	0.76921	75.2814	6913	6913	MS2	22/28	Plasma_iTRAQ_4.raw
																gi11321561	gEcQAEGVLFFQGDR	1	1	HCD	N-Term(iTRAQ4plex), C3(Methylthio)	79.7784	5.98649	1	1	13483	Unique	Used	1.46599	3	615.952	1845.84	1.25792	67.4992	4528	4528	MS2	23/56	Plasma_iTRAQ_1_3.raw
																gi11321561	gEcQAEGVLFFQGDR	1	1	HCD	N-Term(iTRAQ4plex), C3(Methylthio)	94.7458	5.88588	1	1	13294	Unique	Used	1.51647	3	615.951	1845.84	-0.130866	64.5119	4320	4320	MS2	23/56	Plasma_iTRAQ_1_3.raw
																gi11321561	gEcQAEGVLFFQGDR	1	1	HCD	N-Term(iTRAQ4plex), C3(Methylthio)	44.3512	5.58613	1	1	13446	Unique	Used	1.87445	2	923.426	1845.84	3.08385	66.8788	4486	4486	MS2	22/28	Plasma_iTRAQ_1_3.raw
																gi11321561	gEcQAEGVLFFQGDR	1	1	HCD	N-Term(iTRAQ4plex), C3(Methylthio)	53.2688	5.55818	1	1	14410	Unique	Used	1.93521	2	923.423	1845.84	0.372414	82.5461	5577	5577	MS2	22/28	Plasma_iTRAQ_1_3.raw
																gi11321561	gEcQAEGVLFFQGDR	1	1	HCD	N-Term(iTRAQ4plex), C3(Methylthio)	56.549	5.33468	1	1	14294	Unique	Used	1.89734	2	923.425	1845.84	2.81932	80.7777	5453	5453	MS2	21/28	Plasma_iTRAQ_1_3.raw
																gi11321561	gEcQAEGVLFFQGDR	1	1	HCD	N-Term(iTRAQ4plex), C3(Methylthio)	42.8064	5.11955	1	1	14930	Unique	Used	1.43701	2	923.423	1845.84	0.76921	90.069	6143	6143	MS2	24/28	Plasma_iTRAQ_1_3.raw
																gi11321561	gEcQAEGVLFFQGDR	1	1	HCD	N-Term(iTRAQ4plex), C3(Methylthio)	46.6831	5.01442	1	1	11815	Unique	Used	1.5949	2	923.426	1845.84	3.21611	41.5119	2706	2706	MS2	21/28	Plasma_iTRAQ_1_3.raw
																gi11321561	gEcQAEGVLFFQGDR	1	1	HCD	N-Term(iTRAQ4plex), C3(Methylthio)	56.6175	4.78592	1	1	13682	Unique	Used	1.59839	2	923.423	1845.84	-0.156648	70.7704	4750	4750	MS2	21/28	Plasma_iTRAQ_1_3.raw
																gi11321561	gEcQAEGVLFFQGDR	1	1	HCD	N-Term(iTRAQ4plex), C3(Methylthio)	47.8137	4.69274	1	1	11956	Unique	Used	1.54828	2	923.423	1845.84	0.76921	43.7043	2860	2860	MS2	21/28	Plasma_iTRAQ_1_3.raw
																gi11321561	gEcQAEGVLFFQGDR	1	1	HCD	N-Term(iTRAQ4plex), C3(Methylthio)	59.2267	4.34612	1	1	11713	Unique	Used	1.48183	2	923.424	1845.84	1.9596	39.878	2593	2593	MS2	20/28	Plasma_iTRAQ_1_3.raw
																gi11321561	gEcQAEGVLFFQGDREWFWDLATGTMk	1	1	HCD	N-Term(iTRAQ4plex), C3(Methylthio), K27(iTRAQ4plex)	90.2342	7.07706	1	1	13030	Unique	Used	1.81913	4	864.662	3455.63	4.37507	78.5266	5340	5340	MS2	25/156	Plasma_iTRAQ_4_6.raw
																gi11321561	gEFVWk	1	1	HCD	N-Term(iTRAQ4plex), K6(iTRAQ4plex)	10.6213	3.01667	1	1	8132	Unique	Used	0.410567	2	527.3	1053.59	-3.43002	36.8647	2572	2572	MS2	10/10	Plasma_iTRAQ_8.raw
																gi11321561	gGYTLVSGYPk	1	1	HCD	N-Term(iTRAQ4plex), K11(iTRAQ4plex)	63.2938	5.00929	1	1	13127	Unique	Used	1.33991	2	715.402	1429.8	2.00495	61.8679	4138	4138	MS2	17/20	Plasma_iTRAQ_1_3.raw
																gi11321561	gGYTLVSGYPk	1	1	HCD	N-Term(iTRAQ4plex), K11(iTRAQ4plex)	66.0197	5.00399	1	1	12013	Unique	Used	1.20136	2	715.401	1429.79	0.809684	62.9662	4151	4151	MS2	17/20	Plasma_iTRAQ_4_6.raw
																gi11321561	gGYTLVSGYPk	1	1	HCD	N-Term(iTRAQ4plex), K11(iTRAQ4plex)	69.8326	4.96754	1	1	13291	Unique	Used	1.27223	2	715.401	1429.8	1.49269	64.4677	4317	4317	MS2	17/20	Plasma_iTRAQ_1_3.raw
																gi11321561	gGYTLVSGYPk	1	1	HCD	N-Term(iTRAQ4plex), K11(iTRAQ4plex)	60.9981	4.92829	1	1	13367	Unique	Used	1.2952	2	715.402	1429.8	2.1757	65.6577	4400	4400	MS2	17/20	Plasma_iTRAQ_1_3.raw
																gi11321561	gGYTLVSGYPk	1	1	HCD	N-Term(iTRAQ4plex), K11(iTRAQ4plex)	68.7704	4.90704	1	1	12541	Unique	Used	1.20822	2	715.4	1429.79	0.297427	52.8952	3503	3503	MS2	17/20	Plasma_iTRAQ_1_3.raw
																gi11321561	gGYTLVSGYPk	1	1	HCD	N-Term(iTRAQ4plex), K11(iTRAQ4plex)	43.9672	4.8476	1	1	10166	Unique	Used	1.34691	2	715.401	1429.79	1.15119	15.6921	904	904	MS2	17/20	Plasma_iTRAQ_1_3.raw
																gi11321561	gGYTLVSGYPk	1	1	HCD	N-Term(iTRAQ4plex), K11(iTRAQ4plex)	58.5493	4.84145	1	1	12231	Unique	Used	1.36552	2	715.401	1429.79	0.89506	48.1188	3166	3166	MS2	17/20	Plasma_iTRAQ_1_3.raw
																gi11321561	gGYTLVSGYPk	1	1	HCD	N-Term(iTRAQ4plex), K11(iTRAQ4plex)	63.4664	4.8327	1	1	14409	Unique	Used	1.23896	2	715.402	1429.8	2.5172	34.8031	3002	3002	MS2	17/20	Plasma_iTRAQ_4.raw
																gi11321561	gGYTLVSGYPk	1	1	HCD	N-Term(iTRAQ4plex), K11(iTRAQ4plex)	62.9017	4.82552	1	1	14295	Unique	Used	1.21217	2	715.401	1429.79	0.638932	33.5854	2877	2877	MS2	18/20	Plasma_iTRAQ_4.raw
																gi11321561	gGYTLVSGYPk	1	1	HCD	N-Term(iTRAQ4plex), K11(iTRAQ4plex)	60.5121	4.81755	1	1	13524	Unique	Used	1.26185	2	715.4	1429.79	-0.385582	68.1621	4573	4573	MS2	17/20	Plasma_iTRAQ_1_3.raw
																gi11321561	gGYTLVSGYPk	1	1	HCD	N-Term(iTRAQ4plex), K11(iTRAQ4plex)	66.8173	4.79098	1	1	11977	Unique	Used	1.30189	2	715.402	1429.8	2.00495	44.0617	2884	2884	MS2	18/20	Plasma_iTRAQ_1_3.raw
																gi11321561	gGYTLVSGYPk	1	1	HCD	N-Term(iTRAQ4plex), K11(iTRAQ4plex)	60.4306	4.74025	1	1	12563	Unique	Used	1.24911	2	715.4	1429.79	-0.300206	17.1816	983	983	MS2	17/20	Plasma_iTRAQ_4.raw
																gi11321561	gGYTLVSGYPk	1	1	HCD	N-Term(iTRAQ4plex), K11(iTRAQ4plex)	80.1701	4.72102	1	1	10485	Unique	Used	1.34831	2	715.401	1429.79	0.89506	20.6593	1255	1255	MS2	17/20	Plasma_iTRAQ_1_3.raw
																gi11321561	gGYTLVSGYPk	1	1	HCD	N-Term(iTRAQ4plex), K11(iTRAQ4plex)	63.7858	4.70389	1	1	12052	Unique	Used	1.28049	2	715.402	1429.8	2.1757	45.2793	2969	2969	MS2	17/20	Plasma_iTRAQ_1_3.raw
																gi11321561	gGYTLVSGYPk	1	1	HCD	N-Term(iTRAQ4plex), K11(iTRAQ4plex)	63.6052	4.678	1	1	10856	Unique	Used	1.21511	2	715.401	1429.8	1.49269	43.7958	2815	2815	MS2	17/20	Plasma_iTRAQ_4_6.raw
																gi11321561	gGYTLVSGYPk	1	1	HCD	N-Term(iTRAQ4plex), K11(iTRAQ4plex)	53.6164	4.67448	1	1	12310	Unique	Used	1.28625	2	715.401	1429.79	0.724308	49.3508	3252	3252	MS2	17/20	Plasma_iTRAQ_1_3.raw
																gi11321561	gGYTLVSGYPk	1	1	HCD	N-Term(iTRAQ4plex), K11(iTRAQ4plex)	48.671	4.66929	1	1	11492	Unique	Used	1.24823	2	715.4	1429.79	-0.385582	36.4502	2354	2354	MS2	17/20	Plasma_iTRAQ_1_3.raw
																gi11321561	gGYTLVSGYPk	1	1	HCD	N-Term(iTRAQ4plex), K11(iTRAQ4plex)	61.9352	4.65331	1	1	9912	Unique	Used	1.36171	2	715.401	1429.79	0.809684	3.60393	206	206	MS2	17/20	Plasma_iTRAQ_1_3.raw
																gi11321561	gGYTLVSGYPk	1	1	HCD	N-Term(iTRAQ4plex), K11(iTRAQ4plex)	69.7344	4.65133	1	1	13754	Unique	Used	1.2909	2	715.402	1429.8	2.26108	71.975	4831	4831	MS2	17/20	Plasma_iTRAQ_1_3.raw
																gi11321561	gGYTLVSGYPk	1	1	HCD	N-Term(iTRAQ4plex), K11(iTRAQ4plex)	44.9101	4.63896	1	1	10325	Unique	Used	1.28616	2	715.401	1429.8	1.66344	18.18	1080	1080	MS2	17/20	Plasma_iTRAQ_1_3.raw
																gi11321561	gGYTLVSGYPk	1	1	HCD	N-Term(iTRAQ4plex), K11(iTRAQ4plex)	48.9118	4.63155	1	1	10021	Unique	Used	1.33849	2	715.4	1429.79	0.212051	8.54276	491	491	MS2	17/20	Plasma_iTRAQ_1_3.raw
																gi11321561	gGYTLVSGYPk	1	1	HCD	N-Term(iTRAQ4plex), K11(iTRAQ4plex)	62.5231	4.62425	1	1	14016	Unique	Used	1.03812	2	715.399	1429.79	-1.15397	29.2226	2184	2184	MS2	17/20	Plasma_iTRAQ_6.raw
																gi11321561	gGYTLVSGYPk	1	1	HCD	N-Term(iTRAQ4plex), K11(iTRAQ4plex)	49.412	4.60861	1	1	11406	Unique	Used	1.30927	2	715.4	1429.79	0.382804	35.1194	2260	2260	MS2	17/20	Plasma_iTRAQ_1_3.raw
																gi11321561	gGYTLVSGYPk	1	1	HCD	N-Term(iTRAQ4plex), K11(iTRAQ4plex)	44.4112	4.60695	1	1	11659	Unique	Used	1.30921	2	715.401	1429.79	0.724308	39.0352	2535	2535	MS2	17/20	Plasma_iTRAQ_1_3.raw
																gi11321561	gGYTLVSGYPk	1	1	HCD	N-Term(iTRAQ4plex), K11(iTRAQ4plex)	57.5119	4.60499	1	1	11934	Unique	Used	1.18015	2	715.4	1429.79	0.126675	61.7258	4062	4062	MS2	17/20	Plasma_iTRAQ_4_6.raw
																gi11321561	gGYTLVSGYPk	1	1	HCD	N-Term(iTRAQ4plex), K11(iTRAQ4plex)	69.5012	4.60307	1	1	12686	Unique	Used	1.40165	2	715.4	1429.79	-0.0440774	55.1332	3662	3662	MS2	16/20	Plasma_iTRAQ_1_3.raw
																gi11321561	gGYTLVSGYPk	1	1	HCD	N-Term(iTRAQ4plex), K11(iTRAQ4plex)	59.6235	4.59598	1	1	10130	Unique	Used	1.33258	2	715.401	1429.79	0.724308	14.5079	832	832	MS2	17/20	Plasma_iTRAQ_1_3.raw
																gi11321561	gGYTLVSGYPk	1	1	HCD	N-Term(iTRAQ4plex), K11(iTRAQ4plex)	63.8671	4.59403	1	1	9997	Unique	Used	1.24403	2	715.401	1429.79	0.553556	7.33694	422	422	MS2	17/20	Plasma_iTRAQ_1_3.raw
																gi11321561	gGYTLVSGYPk	1	1	HCD	N-Term(iTRAQ4plex), K11(iTRAQ4plex)	56.0492	4.59246	1	1	12865	Unique	Used	1.32039	2	715.401	1429.79	0.724308	57.8513	3855	3855	MS2	17/20	Plasma_iTRAQ_1_3.raw
																gi11321561	gGYTLVSGYPk	1	1	HCD	N-Term(iTRAQ4plex), K11(iTRAQ4plex)	80.2513	4.59205	1	1	13671	Unique	Used	1.36448	2	715.4	1429.79	-0.385582	70.6096	4739	4739	MS2	17/20	Plasma_iTRAQ_1_3.raw
																gi11321561	gGYTLVSGYPk	1	1	HCD	N-Term(iTRAQ4plex), K11(iTRAQ4plex)	52.7649	4.58775	1	1	15022	Unique	Used	1.24799	2	715.4	1429.79	0.382804	93.0054	6321	6321	MS2	17/20	Plasma_iTRAQ_1_3.raw
																gi11321561	gGYTLVSGYPk	1	1	HCD	N-Term(iTRAQ4plex), K11(iTRAQ4plex)	51.0479	4.58372	1	1	10410	Unique	Used	1.38174	2	715.401	1429.79	0.553556	19.464	1172	1172	MS2	17/20	Plasma_iTRAQ_1_3.raw
																gi11321561	gGYTLVSGYPk	1	1	HCD	N-Term(iTRAQ4plex), K11(iTRAQ4plex)	50.7252	4.57444	1	1	14958	Unique	Used	1.31119	2	715.401	1429.79	0.980436	90.6029	6178	6178	MS2	17/20	Plasma_iTRAQ_1_3.raw
																gi11321561	gGYTLVSGYPk	1	1	HCD	N-Term(iTRAQ4plex), K11(iTRAQ4plex)	65.0169	4.57084	1	1	10060	Unique	Used	1.30904	2	715.4	1429.79	0.212051	10.9384	626	626	MS2	17/20	Plasma_iTRAQ_1_3.raw
																gi11321561	gGYTLVSGYPk	1	1	HCD	N-Term(iTRAQ4plex), K11(iTRAQ4plex)	65.5509	4.56336	1	1	12154	Unique	Used	1.30781	2	715.401	1429.79	1.15119	46.889	3081	3081	MS2	17/20	Plasma_iTRAQ_1_3.raw
																gi11321561	gGYTLVSGYPk	1	1	HCD	N-Term(iTRAQ4plex), K11(iTRAQ4plex)	65.3426	4.55992	1	1	10106	Unique	Used	1.34904	2	715.4	1429.79	0.212051	13.3173	763	763	MS2	18/20	Plasma_iTRAQ_1_3.raw
																gi11321561	gGYTLVSGYPk	1	1	HCD	N-Term(iTRAQ4plex), K11(iTRAQ4plex)	58.4025	4.55966	1	1	13039	Unique	Used	1.31956	2	715.4	1429.79	0.297427	60.5298	4043	4043	MS2	17/20	Plasma_iTRAQ_1_3.raw
																gi11321561	gGYTLVSGYPk	1	1	HCD	N-Term(iTRAQ4plex), K11(iTRAQ4plex)	55.72	4.55448	1	1	11583	Unique	Used	1.36744	2	715.4	1429.79	-0.129454	37.8301	2452	2452	MS2	17/20	Plasma_iTRAQ_1_3.raw
																gi11321561	gGYTLVSGYPk	1	1	HCD	N-Term(iTRAQ4plex), K11(iTRAQ4plex)	73.0785	4.55433	1	1	10239	Unique	Used	1.33044	2	715.401	1429.8	1.74882	16.9107	987	987	MS2	17/20	Plasma_iTRAQ_1_3.raw
																gi11321561	gGYTLVSGYPk	1	1	HCD	N-Term(iTRAQ4plex), K11(iTRAQ4plex)	52.767	4.55213	1	1	14234	Unique	Used	1.37181	2	715.4	1429.79	0.297427	79.7676	5384	5384	MS2	17/20	Plasma_iTRAQ_1_3.raw
																gi11321561	gGYTLVSGYPk	1	1	HCD	N-Term(iTRAQ4plex), K11(iTRAQ4plex)	61.2774	4.5461	1	1	13599	Unique	Used	1.32667	2	715.402	1429.8	2.00495	69.3773	4656	4656	MS2	17/20	Plasma_iTRAQ_1_3.raw
																gi11321561	gGYTLVSGYPk	1	1	HCD	N-Term(iTRAQ4plex), K11(iTRAQ4plex)	72.4036	4.53022	1	1	12413	Unique	Used	1.20694	2	715.401	1429.79	0.638932	50.9377	3364	3364	MS2	17/20	Plasma_iTRAQ_1_3.raw
																gi11321561	gGYTLVSGYPk	1	1	HCD	N-Term(iTRAQ4plex), K11(iTRAQ4plex)	70.4381	4.52742	1	1	13450	Unique	Used	1.30865	2	715.401	1429.79	0.553556	66.9579	4491	4491	MS2	17/20	Plasma_iTRAQ_1_3.raw
																gi11321561	gGYTLVSGYPk	1	1	HCD	N-Term(iTRAQ4plex), K11(iTRAQ4plex)	54.5906	4.51655	1	1	9973	Unique	Used	1.28488	2	715.401	1429.79	1.23656	6.13644	353	353	MS2	17/20	Plasma_iTRAQ_1_3.raw
																gi11321561	gGYTLVSGYPk	1	1	HCD	N-Term(iTRAQ4plex), K11(iTRAQ4plex)	46.3069	4.51168	1	1	9887	Unique	Used	1.28533	2	715.4	1429.79	0.46818	2.41799	138	138	MS2	17/20	Plasma_iTRAQ_1_3.raw
																gi11321561	gGYTLVSGYPk	1	1	HCD	N-Term(iTRAQ4plex), K11(iTRAQ4plex)	54.9635	4.51144	1	1	7340	Unique	Used	1.22648	2	715.402	1429.8	2.94408	22.0715	2030	2030	MS2	18/20	Plasma_iTRAQ_6_8.raw
																gi11321561	gGYTLVSGYPk	1	1	HCD	N-Term(iTRAQ4plex), K11(iTRAQ4plex)	67.6458	4.51073	1	1	10083	Unique	Used	1.35455	2	715.401	1429.79	0.89506	12.136	695	695	MS2	17/20	Plasma_iTRAQ_1_3.raw
																gi11321561	gGYTLVSGYPk	1	1	HCD	N-Term(iTRAQ4plex), K11(iTRAQ4plex)	59.5717	4.50332	1	1	14165	Unique	Used	1.31037	2	715.4	1429.79	-0.556335	78.5411	5303	5303	MS2	17/20	Plasma_iTRAQ_1_3.raw
																gi11321561	gGYTLVSGYPk	1	1	HCD	N-Term(iTRAQ4plex), K11(iTRAQ4plex)	63.7993	4.49513	1	1	9946	Unique	Used	1.41807	2	715.401	1429.79	0.724308	4.94246	284	284	MS2	18/20	Plasma_iTRAQ_1_3.raw
																gi11321561	gGYTLVSGYPk	1	1	HCD	N-Term(iTRAQ4plex), K11(iTRAQ4plex)	58.0507	4.49472	1	1	14998	Unique	Used	1.35815	2	715.401	1429.79	0.89506	91.8063	6252	6252	MS2	17/20	Plasma_iTRAQ_1_3.raw
																gi11321561	gGYTLVSGYPk	1	1	HCD	N-Term(iTRAQ4plex), K11(iTRAQ4plex)	70.1588	4.47299	1	1	12958	Unique	Used	1.33908	2	715.401	1429.79	1.32194	59.2892	3956	3956	MS2	17/20	Plasma_iTRAQ_1_3.raw
																gi11321561	gGYTLVSGYPk	1	1	HCD	N-Term(iTRAQ4plex), K11(iTRAQ4plex)	50.3348	4.4603	1	1	9866	Unique	Used	1.39192	2	715.4	1429.79	0.46818	1.24333	72	72	MS2	17/20	Plasma_iTRAQ_1_3.raw
																gi11321561	gGYTLVSGYPk	1	1	HCD	N-Term(iTRAQ4plex), K11(iTRAQ4plex)	71.0725	4.45932	1	1	10567	Unique	Used	1.29534	2	715.4	1429.79	-0.0440774	21.9774	1345	1345	MS2	17/20	Plasma_iTRAQ_1_3.raw
																gi11321561	gGYTLVSGYPk	1	1	HCD	N-Term(iTRAQ4plex), K11(iTRAQ4plex)	65.7624	4.44189	1	1	11467	Unique	Used	0.994738	2	715.405	1429.8	7.3836	28.6641	2072	2072	MS2	17/20	Plasma_iTRAQ_7.raw
																gi11321561	gGYTLVSGYPk	1	1	HCD	N-Term(iTRAQ4plex), K11(iTRAQ4plex)	60.6673	4.4389	1	1	14106	Unique	Used	1.34038	2	715.402	1429.8	2.34645	77.3496	5226	5226	MS2	17/20	Plasma_iTRAQ_1_3.raw
																gi11321561	gGYTLVSGYPk	1	1	HCD	N-Term(iTRAQ4plex), K11(iTRAQ4plex)	37.2164	4.42829	1	1	12634	Unique	Used	1.39804	2	715.4	1429.79	-0.385582	17.3807	984	984	MS2	17/20	Plasma_iTRAQ_5.raw
																gi11321561	gGYTLVSGYPk	1	1	HCD	N-Term(iTRAQ4plex), K11(iTRAQ4plex)	53.2125	4.4248	1	1	13210	Unique	Used	1.37459	2	715.401	1429.79	0.89506	63.1861	4229	4229	MS2	17/20	Plasma_iTRAQ_1_3.raw
																gi11321561	gGYTLVSGYPk	1	1	HCD	N-Term(iTRAQ4plex), K11(iTRAQ4plex)	55.576	4.41321	1	1	14630	Unique	Used	1.34165	2	715.401	1429.79	1.32194	85.48	5812	5812	MS2	17/20	Plasma_iTRAQ_1_3.raw
																gi11321561	gGYTLVSGYPk	1	1	HCD	N-Term(iTRAQ4plex), K11(iTRAQ4plex)	54.9386	4.40743	1	1	15044	Unique	Used	1.35442	2	715.401	1429.79	0.809684	94.1926	6389	6389	MS2	17/20	Plasma_iTRAQ_1_3.raw
																gi11321561	gGYTLVSGYPk	1	1	HCD	N-Term(iTRAQ4plex), K11(iTRAQ4plex)	17.8568	4.37422	1	1	11147	Unique	Used	1.49155	3	477.268	1429.79	-2.76418	31.0897	1977	1977	MS2	17/40	Plasma_iTRAQ_1_3.raw
																gi11321561	gGYTLVSGYPk	1	1	HCD	N-Term(iTRAQ4plex), K11(iTRAQ4plex)	54.9653	4.3609	1	1	15111	Unique	Used	1.47009	2	715.4	1429.79	-0.470959	98.9551	6655	6655	MS2	17/20	Plasma_iTRAQ_1_3.raw
																gi11321561	gGYTLVSGYPk	1	1	HCD	N-Term(iTRAQ4plex), K11(iTRAQ4plex)	63.5292	4.31624	1	1	10036	Unique	Used	1.31104	2	715.401	1429.79	0.553556	9.73919	557	557	MS2	17/20	Plasma_iTRAQ_1_3.raw
																gi11321561	gGYTLVSGYPk	1	1	HCD	N-Term(iTRAQ4plex), K11(iTRAQ4plex)	59.1863	4.30664	1	1	11741	Unique	Used	1.32492	2	715.402	1429.8	2.00495	40.3372	2625	2625	MS2	17/20	Plasma_iTRAQ_1_3.raw
																gi11321561	gGYTLVSGYPk	1	1	HCD	N-Term(iTRAQ4plex), K11(iTRAQ4plex)	48.5303	4.27667	1	1	15061	Unique	Used	1.45352	2	715.4	1429.79	-0.300206	95.3916	6456	6456	MS2	17/20	Plasma_iTRAQ_1_3.raw
																gi11321561	gGYTLVSGYPk	1	1	HCD	N-Term(iTRAQ4plex), K11(iTRAQ4plex)	66.6047	4.26605	1	1	9842	Unique	Used	1.26568	2	715.401	1429.79	0.809684	0.0625433	5	5	MS2	17/20	Plasma_iTRAQ_1_3.raw
																gi11321561	gGYTLVSGYPk	1	1	HCD	N-Term(iTRAQ4plex), K11(iTRAQ4plex)	29.1907	4.24569	1	1	14089	Unique	Used	1.28958	2	715.402	1429.8	2.09032	32.0428	2611	2611	MS2	17/20	Plasma_iTRAQ_5.raw
																gi11321561	gGYTLVSGYPk	1	1	HCD	N-Term(iTRAQ4plex), K11(iTRAQ4plex)	45.9843	4.13897	1	1	15077	Unique	Used	1.3171	2	715.4	1429.79	0.297427	96.5783	6522	6522	MS2	17/20	Plasma_iTRAQ_1_3.raw
																gi11321561	gGYTLVSGYPk	1	1	HCD	N-Term(iTRAQ4plex), K11(iTRAQ4plex)	49.7935	4.10632	1	1	11892	Unique	Used	1.50223	2	715.402	1429.8	2.68795	42.7498	2792	2792	MS2	17/20	Plasma_iTRAQ_1_3.raw
																gi11321561	gGYTLVSGYPk	1	1	HCD	N-Term(iTRAQ4plex), K11(iTRAQ4plex)	35.8266	4.07861	1	1	12510	Unique	Used	1.4031	3	477.269	1429.79	0.245335	52.4109	3469	3469	MS2	15/40	Plasma_iTRAQ_1_3.raw
																gi11321561	gGYTLVSGYPk	1	1	HCD	N-Term(iTRAQ4plex), K11(iTRAQ4plex)	51.8546	4.05361	1	1	15093	Unique	Used	1.37112	2	715.4	1429.79	-0.21483	97.7631	6588	6588	MS2	17/20	Plasma_iTRAQ_1_3.raw
																gi11321561	gGYTLVSGYPk	1	1	HCD	N-Term(iTRAQ4plex), K11(iTRAQ4plex)	61.1421	4.00161	1	1	12304	Unique	Used	1.21925	2	715.4	1429.79	-0.129454	0.133647	10	10	MS2	17/20	Plasma_iTRAQ_4.raw
																gi11321561	gGYTLVSGYPk	1	1	HCD	N-Term(iTRAQ4plex), K11(iTRAQ4plex)	36.3147	3.96707	1	1	13983	Unique	Used	1.33938	3	477.267	1429.79	-4.7492	75.6206	5087	5087	MS2	17/40	Plasma_iTRAQ_1_3.raw
																gi11321561	gGYTLVSGYPk	1	1	HCD	N-Term(iTRAQ4plex), K11(iTRAQ4plex)	40.1871	3.91843	1	1	13451	Unique	Used	1.41278	3	477.27	1429.8	1.59001	66.9679	4492	4492	MS2	16/40	Plasma_iTRAQ_1_3.raw
																gi11321561	gGYTLVSGYPk	1	1	HCD	N-Term(iTRAQ4plex), K11(iTRAQ4plex)	39.1799	3.89897	1	1	13269	Unique	Used	1.33346	3	477.269	1429.79	-0.138858	64.1182	4293	4293	MS2	14/40	Plasma_iTRAQ_1_3.raw
																gi11321561	gGYTLVSGYPk	1	1	HCD	N-Term(iTRAQ4plex), K11(iTRAQ4plex)	55.6988	3.86449	1	1	18930	Unique	Used	1.24804	2	715.4	1429.79	0.297427	91.1769	8088	8088	MS2	17/20	Plasma_iTRAQ_4.raw
																gi11321561	gGYTLVSGYPk	1	1	HCD	N-Term(iTRAQ4plex), K11(iTRAQ4plex)	39.4981	3.84734	1	1	12146	Unique	Used	1.14333	3	477.269	1429.79	-1.22741	46.7518	3072	3072	MS2	16/40	Plasma_iTRAQ_1_3.raw
																gi11321561	gGYTLVSGYPk	1	1	HCD	N-Term(iTRAQ4plex), K11(iTRAQ4plex)	56.5035	3.83609	1	1	12474	Unique	Used	1.59894	2	715.4	1429.79	-0.470959	15.6555	857	857	MS2	17/20	Plasma_iTRAQ_4.raw
																gi11321561	gGYTLVSGYPk	1	1	HCD	N-Term(iTRAQ4plex), K11(iTRAQ4plex)	34.9143	3.83571	1	1	13583	Unique	Used	1.45732	3	477.269	1429.79	-1.35547	69.1134	4638	4638	MS2	15/40	Plasma_iTRAQ_1_3.raw
																gi11321561	gGYTLVSGYPk	1	1	HCD	N-Term(iTRAQ4plex), K11(iTRAQ4plex)	39.739	3.82325	1	1	12740	Unique	Used	1.2209	3	477.268	1429.79	-2.31596	55.9504	3720	3720	MS2	16/40	Plasma_iTRAQ_1_3.raw
																gi11321561	gGYTLVSGYPk	1	1	HCD	N-Term(iTRAQ4plex), K11(iTRAQ4plex)	37.1194	3.76571	1	1	12314	Unique	Used	1.42344	3	477.27	1429.79	1.01372	49.4094	3256	3256	MS2	16/40	Plasma_iTRAQ_1_3.raw
																gi11321561	gGYTLVSGyPk	1	1	HCD	N-Term(iTRAQ4plex), Y9(iTRAQ4plex), K11(iTRAQ4plex)	16.8142	3.76544	1	1	10377	Unique	Used	1.08244	3	525.301	1573.89	-4.24457	35.5886	2246	2246	MS2	17/40	Plasma_iTRAQ_4_6.raw
																gi11321561	gGYTLVSGYPk	1	1	HCD	N-Term(iTRAQ4plex), K11(iTRAQ4plex)	27.063	3.72251	1	1	14410	Unique	Used	1.25455	3	477.27	1429.8	1.7821	34.8062	3003	3003	MS2	17/40	Plasma_iTRAQ_4.raw
																gi11321561	gGYTLVSGYPk	1	1	HCD	N-Term(iTRAQ4plex), K11(iTRAQ4plex)	24.4555	3.71668	1	1	12061	Unique	Used	1.29402	3	477.27	1429.79	1.01372	45.4204	2979	2979	MS2	18/40	Plasma_iTRAQ_1_3.raw
																gi11321561	gGYTLVSGYPk	1	1	HCD	N-Term(iTRAQ4plex), K11(iTRAQ4plex)	44.6326	3.69618	1	1	13140	Unique	Used	1.30686	3	477.27	1429.79	1.20582	62.0748	4152	4152	MS2	16/40	Plasma_iTRAQ_1_3.raw
																gi11321561	gGYTLVSGYPk	1	1	HCD	N-Term(iTRAQ4plex), K11(iTRAQ4plex)	26.5143	3.69532	1	1	18956	Unique	Used	1.39811	2	715.401	1429.79	0.89506	93.7586	8229	8229	MS2	16/20	Plasma_iTRAQ_4.raw
																gi11321561	gGYTLVSGYPk	1	1	HCD	N-Term(iTRAQ4plex), K11(iTRAQ4plex)	38.2992	3.68956	1	1	13892	Unique	Used	1.6167	3	477.27	1429.8	2.23033	74.1734	4984	4984	MS2	14/40	Plasma_iTRAQ_1_3.raw
																gi11321561	gGYTLVSGYPk	1	1	HCD	N-Term(iTRAQ4plex), K11(iTRAQ4plex)	25.9672	3.67615	1	1	8047	Unique	Used	0.825869	3	477.272	1429.8	5.36788	34.8616	2429	2429	MS2	15/40	Plasma_iTRAQ_8.raw
																gi11321561	gGYTLVSGYPk	1	1	HCD	N-Term(iTRAQ4plex), K11(iTRAQ4plex)	24.2585	3.66512	1	1	11987	Unique	Used	1.49428	3	477.27	1429.79	1.01372	44.2133	2895	2895	MS2	18/40	Plasma_iTRAQ_1_3.raw
																gi11321561	gGYTLVSGyPk	1	1	HCD	N-Term(iTRAQ4plex), Y9(iTRAQ4plex), K11(iTRAQ4plex)	33.6088	3.6612	1	1	7578	Unique	Used	0.69058	3	525.302	1573.89	-1.80144	26.8963	1770	1770	MS2	19/40	Plasma_iTRAQ_8.raw
																gi11321561	gGYTLVSGYPk	1	1	HCD	N-Term(iTRAQ4plex), K11(iTRAQ4plex)	40.4833	3.65749	1	1	13349	Unique	Used	1.30961	3	477.269	1429.79	0.181303	65.3665	4380	4380	MS2	17/40	Plasma_iTRAQ_1_3.raw
																gi11321561	gGYTLVSGYPk	1	1	HCD	N-Term(iTRAQ4plex), K11(iTRAQ4plex)	49.4132	3.64049	1	1	18942	Unique	Used	1.35696	2	715.4	1429.79	0.212051	92.3642	8153	8153	MS2	16/20	Plasma_iTRAQ_4.raw
																gi11321561	gGYTLVSGYPk	1	1	HCD	N-Term(iTRAQ4plex), K11(iTRAQ4plex)	35.7671	3.63331	1	1	12593	Unique	Used	1.31444	3	477.27	1429.79	1.26985	53.6852	3560	3560	MS2	16/40	Plasma_iTRAQ_1_3.raw
																gi11321561	gGYTLVSGYPk	1	1	HCD	N-Term(iTRAQ4plex), K11(iTRAQ4plex)	31.821	3.59183	1	1	11905	Unique	Used	1.58546	3	477.27	1429.8	1.71807	42.9317	2806	2806	MS2	16/40	Plasma_iTRAQ_1_3.raw
																gi11321561	gGYTLVSGYPk	1	1	HCD	N-Term(iTRAQ4plex), K11(iTRAQ4plex)	37.6296	3.56551	1	1	10241	Unique	Used	1.32657	3	477.27	1429.79	0.885656	16.921	989	989	MS2	16/40	Plasma_iTRAQ_1_3.raw
																gi11321561	gGYTLVSGYPk	1	1	HCD	N-Term(iTRAQ4plex), K11(iTRAQ4plex)	42.4761	3.49659	1	1	12396	Unique	Used	1.27544	3	477.268	1429.79	-1.54757	50.6679	3345	3345	MS2	15/40	Plasma_iTRAQ_1_3.raw
																gi11321561	gGYTLVSGYPk	1	1	HCD	N-Term(iTRAQ4plex), K11(iTRAQ4plex)	40.0572	3.46839	1	1	11337	Unique	Used	1.36562	3	477.268	1429.79	-2.70015	34.0525	2184	2184	MS2	16/40	Plasma_iTRAQ_1_3.raw
																gi11321561	gGYTLVSGYPk	1	1	HCD	N-Term(iTRAQ4plex), K11(iTRAQ4plex)	43.2093	3.45895	1	1	12225	Unique	Used	1.40462	3	477.269	1429.79	-0.77918	48.0143	3159	3159	MS2	15/40	Plasma_iTRAQ_1_3.raw
																gi11321561	gGYTLVSGYPk	1	1	HCD	N-Term(iTRAQ4plex), K11(iTRAQ4plex)	39.194	3.36613	1	1	11628	Unique	Used	1.46345	3	477.269	1429.79	-0.0107937	38.5223	2500	2500	MS2	16/40	Plasma_iTRAQ_1_3.raw
																gi11321561	gGYTLVSGYPk	1	1	HCD	N-Term(iTRAQ4plex), K11(iTRAQ4plex)	44.2664	3.33667	1	1	10158	Unique	Used	1.27561	3	477.269	1429.79	-1.29144	15.5372	894	894	MS2	16/40	Plasma_iTRAQ_1_3.raw
																gi11321561	gGYTLVSGYPk	1	1	HCD	N-Term(iTRAQ4plex), K11(iTRAQ4plex)	66.8298	3.26706	1	1	14301	Unique	Used	1.26687	1	1429.79	1429.79	-0.162737	33.6186	2883	2883	MS2	12/20	Plasma_iTRAQ_4.raw
																gi11321561	gGYTLVSGYPk	1	1	HCD	N-Term(iTRAQ4plex), K11(iTRAQ4plex)	27.6289	3.21633	1	1	14427	Unique	Used	1.31064	1	1429.8	1429.8	3.42305	34.9659	3021	3021	MS2	14/20	Plasma_iTRAQ_4.raw
																gi11321561	gGYTLVSGYPk	1	1	HCD	N-Term(iTRAQ4plex), K11(iTRAQ4plex)	8.03337	3.01894	1	1	11492	Unique	Used	1.30333	1	1429.8	1429.8	6.15506	28.8559	2099	2099	MS2	12/20	Plasma_iTRAQ_7.raw
																gi11321561	lLQDEFPGIPSPLDAAVEcHR	1	1	HCD	N-Term(iTRAQ4plex), C19(Methylthio)	108.643	6.97077	1	1	11881	Unique	Used	1.47738	3	833.084	2497.24	1.55679	60.8311	4000	4000	MS2	33/80	Plasma_iTRAQ_4_6.raw
																gi11321561	lLQDEFPGIPSPLDAAVEcHR	1	1	HCD	N-Term(iTRAQ4plex), C19(Methylthio)	104.553	6.95204	1	1	12933	Unique	Used	1.7437	3	833.082	2497.23	-0.496258	76.856	5206	5206	MS2	31/80	Plasma_iTRAQ_4_6.raw
																gi11321561	lLQDEFPGIPSPLDAAVEcHR	1	1	HCD	N-Term(iTRAQ4plex), C19(Methylthio)	114.215	6.8914	1	1	12178	Unique	Used	1.92598	3	833.084	2497.24	1.11685	65.7128	4345	4345	MS2	28/80	Plasma_iTRAQ_4_6.raw
																gi11321561	lLQDEFPGIPSPLDAAVEcHR	1	1	HCD	N-Term(iTRAQ4plex), C19(Methylthio)	100.673	6.81813	1	1	11285	Unique	Used	1.55292	3	833.084	2497.24	1.85008	51.0506	3314	3314	MS2	30/80	Plasma_iTRAQ_4_6.raw
																gi11321561	lLQDEFPGIPSPLDAAVEcHR	1	1	HCD	N-Term(iTRAQ4plex), C19(Methylthio)	107.922	6.78769	1	1	17888	Unique	Used	2.23157	3	833.085	2497.24	2.14338	72.8081	6822	6822	MS2	29/80	Plasma_iTRAQ_6.raw
																gi11321561	lLQDEFPGIPSPLDAAVEcHR	1	1	HCD	N-Term(iTRAQ4plex), C19(Methylthio)	112.737	6.77059	1	1	12732	Unique	Used	1.72184	3	833.084	2497.24	1.70344	74.1595	4972	4972	MS2	30/80	Plasma_iTRAQ_4_6.raw
																gi11321561	lLQDEFPGIPSPLDAAVEcHR	1	1	HCD	N-Term(iTRAQ4plex), C19(Methylthio)	70.3996	6.75571	1	1	7912	Unique	Used	1.63674	3	833.084	2497.24	1.2635	27.0158	2640	2640	MS2	29/80	Plasma_iTRAQ_6_8.raw
																gi11321561	lLqDEFPGIPSPLDAAVEcHR	1	1	HCD	N-Term(iTRAQ4plex), Q3(Deamidated), C19(Methylthio)	108.125	6.71146	1	1	17674	Unique	Used	2.67638	4	625.311	2498.22	2.32971	69.302	6520	6520	MS2	31/120	Plasma_iTRAQ_6.raw
																gi11321561	lLQDEFPGIPSPLDAAVEcHR	1	1	HCD	N-Term(iTRAQ4plex), C19(Methylthio)	99.1497	6.69657	1	1	17736	Unique	Used	1.25564	3	833.084	2497.24	1.85008	70.4111	6612	6612	MS2	29/80	Plasma_iTRAQ_6.raw
																gi11321561	lLQDEFPGIPSPLDAAVEcHR	1	1	HCD	N-Term(iTRAQ4plex), C19(Methylthio)	126.092	6.67688	1	1	12032	Unique	Used	1.85086	3	833.085	2497.24	2.2167	63.3014	4174	4174	MS2	31/80	Plasma_iTRAQ_4_6.raw
																gi11321561	lLQDEFPGIPSPLDAAVEcHR	1	1	HCD	N-Term(iTRAQ4plex), C19(Methylthio)	104.079	6.66708	1	1	17610	Unique	Used	1.65093	3	833.084	2497.24	1.2635	72.7824	6681	6681	MS2	31/80	Plasma_iTRAQ_5.raw
																gi11321561	lLQDEFPGIPSPLDAAVEcHR	1	1	HCD	N-Term(iTRAQ4plex), C19(Methylthio)	99.4948	6.66573	1	1	13715	Unique	Used	1.77626	3	833.084	2497.24	1.85008	89.24	6117	6117	MS2	27/80	Plasma_iTRAQ_4_6.raw
																gi11321561	lLQDEFPGIPSPLDAAVEcHR	1	1	HCD	N-Term(iTRAQ4plex), C19(Methylthio)	110.815	6.64162	1	1	13160	Unique	Used	1.85209	3	833.084	2497.24	1.55679	80.8524	5506	5506	MS2	30/80	Plasma_iTRAQ_4_6.raw
																gi11321561	lLQDEFPGIPSPLDAAVEcHR	1	1	HCD	N-Term(iTRAQ4plex), C19(Methylthio)	97.5809	6.63856	1	1	13775	Unique	Used	1.63135	3	833.084	2497.24	1.70344	90.4804	6199	6199	MS2	30/80	Plasma_iTRAQ_4_6.raw
																gi11321561	lLQDEFPGIPSPLDAAVEcHR	1	1	HCD	N-Term(iTRAQ4plex), C19(Methylthio)	73.0337	6.61654	1	1	7909	Unique	Used	1.86125	3	833.084	2497.24	1.2635	26.9854	2637	2637	MS2	27/80	Plasma_iTRAQ_6_8.raw
																gi11321561	lLQDEFPGIPSPLDAAVEcHR	1	1	HCD	N-Term(iTRAQ4plex), C19(Methylthio)	89.1994	6.60699	1	1	17451	Unique	Used	1.56361	3	833.084	2497.24	1.70344	65.9056	6219	6219	MS2	28/80	Plasma_iTRAQ_6.raw
																gi11321561	lLQDEFPGIPSPLDAAVEcHR	1	1	HCD	N-Term(iTRAQ4plex), C19(Methylthio)	126.936	6.57371	1	1	13485	Unique	Used	1.85547	3	833.084	2497.24	1.11685	85.658	5860	5860	MS2	29/80	Plasma_iTRAQ_4_6.raw
																gi11321561	lLqDEFPGIPSPLDAAVEcHR	1	1	HCD	N-Term(iTRAQ4plex), Q3(Deamidated), C19(Methylthio)	103.786	6.53654	1	1	17668	Unique	Used	2.11105	2	1249.62	2498.23	4.5393	69.2177	6512	6512	MS2	25/40	Plasma_iTRAQ_6.raw
																gi11321561	lLQDEFPGIPSPLDAAVEcHR	1	1	HCD	N-Term(iTRAQ4plex), C19(Methylthio)	103.02	6.50131	1	1	19089	Unique	Used	1.41134	3	833.084	2497.24	1.04353	89.1558	8231	8231	MS2	32/80	Plasma_iTRAQ_6.raw
																gi11321561	lLQDEFPGIPSPLDAAVEcHR	1	1	HCD	N-Term(iTRAQ4plex), C19(Methylthio)	79.7805	6.49104	1	1	7916	Unique	Used	1.91053	3	833.085	2497.24	2.65664	27.0642	2645	2645	MS2	27/80	Plasma_iTRAQ_6_8.raw
																gi11321561	lLqDEFPGIPSPLDAAVEcHR	1	1	HCD	N-Term(iTRAQ4plex), Q3(Deamidated), C19(Methylthio)	89.8883	6.47666	1	1	17678	Unique	Used	2.05565	3	833.414	2498.23	3.82541	69.3482	6525	6525	MS2	27/80	Plasma_iTRAQ_6.raw
																gi11321561	lLQDEFPGIPSPLDAAVEcHR	1	1	HCD	N-Term(iTRAQ4plex), C19(Methylthio)	120.072	6.47611	1	1	17939	Unique	Used	1.79401	3	833.083	2497.23	-0.0563183	77.0224	7059	7059	MS2	29/80	Plasma_iTRAQ_5.raw
																gi11321561	lLQDEFPGIPSPLDAAVEcHR	1	1	HCD	N-Term(iTRAQ4plex), C19(Methylthio)	109.995	6.46029	1	1	19021	Unique	Used	1.98119	3	833.084	2497.24	1.04353	87.9297	8149	8149	MS2	33/80	Plasma_iTRAQ_6.raw
																gi11321561	lLQDEFPGIPSPLDAAVEcHR	1	1	HCD	N-Term(iTRAQ4plex), C19(Methylthio)	107.482	6.44991	1	1	11810	Unique	Used	2.0646	3	833.084	2497.24	1.33682	59.6473	3918	3918	MS2	29/80	Plasma_iTRAQ_4_6.raw
																gi11321561	lLQDEFPGIPSPLDAAVEcHR	1	1	HCD	N-Term(iTRAQ4plex), C19(Methylthio)	115.49	6.40481	1	1	15798	Unique	Used	1.13071	3	833.083	2497.24	0.603591	88.351	7628	7628	MS2	27/80	Plasma_iTRAQ_7.raw
																gi11321561	lLQDEFPGIPSPLDAAVEcHR	1	1	HCD	N-Term(iTRAQ4plex), C19(Methylthio)	73.4996	6.37179	1	1	7921	Unique	Used	1.58493	3	833.085	2497.24	2.65664	27.1104	2650	2650	MS2	28/80	Plasma_iTRAQ_6_8.raw
																gi11321561	lLQDEFPGIPSPLDAAVEcHR	1	1	HCD	N-Term(iTRAQ4plex), C19(Methylthio)	114.069	6.3587	1	1	17964	Unique	Used	1.75933	3	833.085	2497.24	2.65664	74.0073	6926	6926	MS2	27/80	Plasma_iTRAQ_6.raw
																gi11321561	lLQDEFPGIPSPLDAAVEcHR	1	1	HCD	N-Term(iTRAQ4plex), C19(Methylthio)	89.619	6.34813	1	1	12531	Unique	Used	1.42004	3	833.083	2497.24	0.530268	71.1817	4746	4746	MS2	26/80	Plasma_iTRAQ_4_6.raw
																gi11321561	lLQDEFPGIPSPLDAAVEcHR	1	1	HCD	N-Term(iTRAQ4plex), C19(Methylthio)	103.042	6.34773	1	1	17273	Unique	Used	1.51542	3	833.083	2497.24	0.530268	63.6997	5994	5994	MS2	29/80	Plasma_iTRAQ_6.raw
																gi11321561	lLQDEFPGIPSPLDAAVEcHR	1	1	HCD	N-Term(iTRAQ4plex), C19(Methylthio)	110.34	6.33319	1	1	11136	Unique	Used	1.35169	3	833.084	2497.24	1.55679	48.6312	3145	3145	MS2	28/80	Plasma_iTRAQ_4_6.raw
																gi11321561	lLQDEFPGIPSPLDAAVEcHR	1	1	HCD	N-Term(iTRAQ4plex), C19(Methylthio)	13.566	6.33256	1	1	12724	Unique	Used	1.38624	4	625.064	2497.24	0.720412	74.0274	4963	4963	MS2	19/120	Plasma_iTRAQ_4_6.raw
																gi11321561	lLQDEFPGIPSPLDAAVEcHR	1	1	HCD	N-Term(iTRAQ4plex), C19(Methylthio)	110.069	6.32628	1	1	19151	Unique	Used	1.62422	3	833.084	2497.24	1.11685	90.3867	8312	8312	MS2	29/80	Plasma_iTRAQ_6.raw
																gi11321561	lLQDEFPGIPSPLDAAVEcHR	1	1	HCD	N-Term(iTRAQ4plex), C19(Methylthio)	113.64	6.31887	1	1	13650	Unique	Used	2.37871	3	833.084	2497.24	1.55679	88.0689	6038	6038	MS2	28/80	Plasma_iTRAQ_4_6.raw
																gi11321561	lLQDEFPGIPSPLDAAVEcHR	1	1	HCD	N-Term(iTRAQ4plex), C19(Methylthio)	90.7263	6.31307	1	1	10705	Unique	Used	1.81853	3	833.084	2497.24	1.41015	41.0883	2628	2628	MS2	27/80	Plasma_iTRAQ_4_6.raw
																gi11321561	lLQDEFPGIPSPLDAAVEcHR	1	1	HCD	N-Term(iTRAQ4plex), C19(Methylthio)	109.286	6.31133	1	1	11650	Unique	Used	2.53996	3	833.084	2497.24	1.2635	57.1738	3739	3739	MS2	27/80	Plasma_iTRAQ_4_6.raw
																gi11321561	lLQDEFPGIPSPLDAAVEcHR	1	1	HCD	N-Term(iTRAQ4plex), C19(Methylthio)	114.057	6.29289	1	1	18543	Unique	Used	1.35577	3	833.084	2497.24	1.2635	81.8023	7637	7637	MS2	28/80	Plasma_iTRAQ_6.raw
																gi11321561	lLQDEFPGIPSPLDAAVEcHR	1	1	HCD	N-Term(iTRAQ4plex), C19(Methylthio)	106.098	6.28266	1	1	15726	Unique	Used	1.29869	3	833.085	2497.24	2.94993	87.1435	7546	7546	MS2	27/80	Plasma_iTRAQ_7.raw
																gi11321561	lLQDEFPGIPSPLDAAVEcHR	1	1	HCD	N-Term(iTRAQ4plex), C19(Methylthio)	76.3635	6.27276	1	1	7971	Unique	Used	2.06537	3	833.084	2497.24	1.2635	27.6243	2703	2703	MS2	28/80	Plasma_iTRAQ_6_8.raw
																gi11321561	lLQDEFPGIPSPLDAAVEcHR	1	1	HCD	N-Term(iTRAQ4plex), C19(Methylthio)	21.633	6.27242	1	1	10549	Unique	Used	1.27267	3	833.084	2497.24	1.11685	38.4815	2446	2446	MS2	25/80	Plasma_iTRAQ_4_6.raw
																gi11321561	lLQDEFPGIPSPLDAAVEcHR	1	1	HCD	N-Term(iTRAQ4plex), C19(Methylthio)	108.246	6.27157	1	1	13316	Unique	Used	1.65842	3	833.083	2497.23	0.383622	83.2866	5679	5679	MS2	27/80	Plasma_iTRAQ_4_6.raw
																gi11321561	lLQDEFPGIPSPLDAAVEcHR	1	1	HCD	N-Term(iTRAQ4plex), C19(Methylthio)	96.5755	6.25378	1	1	10760	Unique	Used	1.31108	3	833.085	2497.24	2.43667	88.1622	6426	6426	MS2	27/80	Plasma_iTRAQ_8.raw
																gi11321561	lLQDEFPGIPSPLDAAVEcHR	1	1	HCD	N-Term(iTRAQ4plex), C19(Methylthio)	19.794	6.25037	1	1	17623	Unique	Used	1.40667	4	625.065	2497.24	2.28464	72.926	6695	6695	MS2	25/120	Plasma_iTRAQ_5.raw
																gi11321561	lLQDEFPGIPSPLDAAVEcHR	1	1	HCD	N-Term(iTRAQ4plex), C19(Methylthio)	117.727	6.24289	1	1	11066	Unique	Used	1.53691	3	833.084	2497.24	1.85008	47.3819	3060	3060	MS2	28/80	Plasma_iTRAQ_4_6.raw
																gi11321561	lLQDEFPGIPSPLDAAVEcHR	1	1	HCD	N-Term(iTRAQ4plex), C19(Methylthio)	107.641	6.23674	1	1	11209	Unique	Used	1.36006	3	833.084	2497.24	0.970207	49.8265	3228	3228	MS2	32/80	Plasma_iTRAQ_4_6.raw
																gi11321561	lLQDEFPGIPSPLDAAVEcHR	1	1	HCD	N-Term(iTRAQ4plex), C19(Methylthio)	116.185	6.2279	1	1	15838	Unique	Used	1.13797	3	833.084	2497.24	1.77676	89.6738	7703	7703	MS2	26/80	Plasma_iTRAQ_7.raw
																gi11321561	lLQDEFPGIPSPLDAAVEcHR	1	1	HCD	N-Term(iTRAQ4plex), C19(Methylthio)	47.686	6.22741	1	1	11736	Unique	Used	1.25422	4	625.064	2497.23	0.23159	58.5014	3835	3835	MS2	27/120	Plasma_iTRAQ_4_6.raw
																gi11321561	lLQDEFPGIPSPLDAAVEcHR	1	1	HCD	N-Term(iTRAQ4plex), C19(Methylthio)	112.47	6.22691	1	1	11359	Unique	Used	1.96923	3	833.084	2497.24	1.70344	52.3119	3401	3401	MS2	33/80	Plasma_iTRAQ_4_6.raw
																gi11321561	lLQDEFPGIPSPLDAAVEcHR	1	1	HCD	N-Term(iTRAQ4plex), C19(Methylthio)	110.91	6.22216	1	1	18937	Unique	Used	1.54927	3	833.084	2497.24	1.41015	86.6986	8058	8058	MS2	29/80	Plasma_iTRAQ_6.raw
																gi11321561	lLQDEFPGIPSPLDAAVEcHR	1	1	HCD	N-Term(iTRAQ4plex), C19(Methylthio)	99.1826	6.21425	1	1	13008	Unique	Used	1.87246	3	833.084	2497.24	0.970207	78.0879	5308	5308	MS2	28/80	Plasma_iTRAQ_4_6.raw
																gi11321561	lLQDEFPGIPSPLDAAVEcHR	1	1	HCD	N-Term(iTRAQ4plex), C19(Methylthio)	90.6558	6.20805	1	1	7906	Unique	Used	1.56953	3	833.084	2497.24	1.2635	26.9577	2634	2634	MS2	29/80	Plasma_iTRAQ_6_8.raw
																gi11321561	lLQDEFPGIPSPLDAAVEcHR	1	1	HCD	N-Term(iTRAQ4plex), C19(Methylthio)	101.684	6.18509	1	1	8151	Unique	Used	1.58232	3	833.084	2497.24	1.92341	29.2524	2895	2895	MS2	30/80	Plasma_iTRAQ_6_8.raw
																gi11321561	lLQDEFPGIPSPLDAAVEcHR	1	1	HCD	N-Term(iTRAQ4plex), C19(Methylthio)	81.8443	6.15337	1	1	12256	Unique	Used	1.29074	3	833.083	2497.23	0.456945	66.9478	4433	4433	MS2	29/80	Plasma_iTRAQ_4_6.raw
																gi11321561	lLQDEFPGIPSPLDAAVEcHR	1	1	HCD	N-Term(iTRAQ4plex), C19(Methylthio)	102.679	6.13686	1	1	10994	Unique	Used	1.82887	3	833.084	2497.24	1.55679	46.1887	2978	2978	MS2	28/80	Plasma_iTRAQ_4_6.raw
																gi11321561	lLQDEFPGIPSPLDAAVEcHR	1	1	HCD	N-Term(iTRAQ4plex), C19(Methylthio)	111.911	6.12956	1	1	17807	Unique	Used	1.74783	3	833.084	2497.24	1.85008	71.6099	6714	6714	MS2	28/80	Plasma_iTRAQ_6.raw
																gi11321561	lLQDEFPGIPSPLDAAVEcHR	1	1	HCD	N-Term(iTRAQ4plex), C19(Methylthio)	108.21	6.12457	1	1	11431	Unique	Used	2.03831	3	833.084	2497.24	1.77676	53.51	3484	3484	MS2	32/80	Plasma_iTRAQ_4_6.raw
																gi11321561	lLQDEFPGIPSPLDAAVEcHR	1	1	HCD	N-Term(iTRAQ4plex), C19(Methylthio)	104.693	6.11816	1	1	13569	Unique	Used	2.37791	3	833.084	2497.24	1.63012	86.8502	5950	5950	MS2	30/80	Plasma_iTRAQ_4_6.raw
																gi11321561	lLQDEFPGIPSPLDAAVEcHR	1	1	HCD	N-Term(iTRAQ4plex), C19(Methylthio)	90.5267	6.11571	1	1	10846	Unique	Used	1.65246	3	833.084	2497.24	1.55679	43.6156	2802	2802	MS2	29/80	Plasma_iTRAQ_4_6.raw
																gi11321561	lLQDEFPGIPSPLDAAVEcHR	1	1	HCD	N-Term(iTRAQ4plex), C19(Methylthio)	107.421	6.11495	1	1	18834	Unique	Used	2.22217	3	833.085	2497.24	2.58331	85.2899	7948	7948	MS2	26/80	Plasma_iTRAQ_6.raw
																gi11321561	lLQDEFPGIPSPLDAAVEcHR	1	1	HCD	N-Term(iTRAQ4plex), C19(Methylthio)	116.442	6.1113	1	1	9690	Unique	Used	1.15057	3	833.083	2497.23	0.0903284	74.004	5211	5211	MS2	27/80	Plasma_iTRAQ_8.raw
																gi11321561	lLQDEFPGIPSPLDAAVEcHR	1	1	HCD	N-Term(iTRAQ4plex), C19(Methylthio)	76.5275	6.09878	1	1	12418	Unique	Used	1.60794	3	833.084	2497.24	1.2635	69.4444	4617	4617	MS2	27/80	Plasma_iTRAQ_4_6.raw
																gi11321561	lLQDEFPGIPSPLDAAVEcHR	1	1	HCD	N-Term(iTRAQ4plex), C19(Methylthio)	101.543	6.09056	1	1	18100	Unique	Used	1.29949	3	833.085	2497.24	2.36335	77.2598	7095	7095	MS2	30/80	Plasma_iTRAQ_4.raw
																gi11321561	lLQDEFPGIPSPLDAAVEcHR	1	1	HCD	N-Term(iTRAQ4plex), C19(Methylthio)	113.741	6.08287	1	1	11957	Unique	Used	1.68966	3	833.084	2497.24	1.77676	62.09	4087	4087	MS2	29/80	Plasma_iTRAQ_4_6.raw
																gi11321561	lLQDEFPGIPSPLDAAVEcHR	1	1	HCD	N-Term(iTRAQ4plex), C19(Methylthio)	109.481	6.08019	1	1	13086	Unique	Used	1.65956	3	833.084	2497.24	0.970207	79.6	5418	5418	MS2	30/80	Plasma_iTRAQ_4_6.raw
																gi11321561	lLQDEFPGIPSPLDAAVEcHR	1	1	HCD	N-Term(iTRAQ4plex), C19(Methylthio)	107.271	6.07432	1	1	17545	Unique	Used	1.9355	3	833.087	2497.25	4.70968	67.1058	6336	6336	MS2	29/80	Plasma_iTRAQ_6.raw
																gi11321561	lLQDEFPGIPSPLDAAVEcHR	1	1	HCD	N-Term(iTRAQ4plex), C19(Methylthio)	64.1018	6.07311	1	1	7937	Unique	Used	1.38795	3	833.084	2497.24	1.41015	27.2627	2667	2667	MS2	29/80	Plasma_iTRAQ_6_8.raw
																gi11321561	lLQDEFPGIPSPLDAAVEcHR	1	1	HCD	N-Term(iTRAQ4plex), C19(Methylthio)	131.126	6.03096	1	1	17564	Unique	Used	2.83257	4	625.065	2497.24	1.99135	67.4556	6364	6364	MS2	33/120	Plasma_iTRAQ_6.raw
																gi11321561	lLQDEFPGIPSPLDAAVEcHR	1	1	HCD	N-Term(iTRAQ4plex), C19(Methylthio)	91.2341	6.0281	1	1	18437	Unique	Used	1.33414	3	833.086	2497.24	3.53651	80.2929	7519	7519	MS2	28/80	Plasma_iTRAQ_6.raw
																gi11321561	lLQDEFPGIPSPLDAAVEcHR	1	1	HCD	N-Term(iTRAQ4plex), C19(Methylthio)	102.732	6.02541	1	1	11506	Unique	Used	1.88304	3	833.084	2497.24	1.48347	54.7345	3571	3571	MS2	28/80	Plasma_iTRAQ_4_6.raw
																gi11321561	lLQDEFPGIPSPLDAAVEcHR	1	1	HCD	N-Term(iTRAQ4plex), C19(Methylthio)	108.397	6.01051	1	1	17692	Unique	Used	1.63065	3	833.084	2497.24	1.70344	73.9745	6776	6776	MS2	29/80	Plasma_iTRAQ_5.raw
																gi11321561	lLQDEFPGIPSPLDAAVEcHR	1	1	HCD	N-Term(iTRAQ4plex), C19(Methylthio)	126.793	5.9835	1	1	17477	Unique	Used	1.98156	2	1249.12	2497.23	-0.686403	66.1967	6250	6250	MS2	25/40	Plasma_iTRAQ_6.raw
																gi11321561	lLQDEFPGIPSPLDAAVEcHR	1	1	HCD	N-Term(iTRAQ4plex), C19(Methylthio)	33.6187	5.9768	1	1	12072	Unique	Used	0.973031	4	625.065	2497.24	2.08911	63.9266	4219	4219	MS2	22/120	Plasma_iTRAQ_4_6.raw
																gi11321561	lLQDEFPGIPSPLDAAVEcHR	1	1	HCD	N-Term(iTRAQ4plex), C19(Methylthio)	130.201	5.97183	1	1	17753	Unique	Used	1.94387	2	1249.12	2497.24	2.63758	70.6092	6633	6633	MS2	25/40	Plasma_iTRAQ_6.raw
																gi11321561	lLQDEFPGIPSPLDAAVEcHR	1	1	HCD	N-Term(iTRAQ4plex), C19(Methylthio)	87.4464	5.93767	1	1	7940	Unique	Used	1.41992	3	833.084	2497.24	1.41015	27.2932	2670	2670	MS2	27/80	Plasma_iTRAQ_6_8.raw
																gi11321561	lLQDEFPGIPSPLDAAVEcHR	1	1	HCD	N-Term(iTRAQ4plex), C19(Methylthio)	79.9223	5.93479	1	1	12336	Unique	Used	1.48845	3	833.084	2497.24	1.77676	68.167	4523	4523	MS2	26/80	Plasma_iTRAQ_4_6.raw
																gi11321561	lLQDEFPGIPSPLDAAVEcHR	1	1	HCD	N-Term(iTRAQ4plex), C19(Methylthio)	89.2178	5.91315	1	1	10796	Unique	Used	1.31078	3	833.084	2497.24	1.63012	89.4209	6496	6496	MS2	27/80	Plasma_iTRAQ_8.raw
																gi11321561	lLQDEFPGIPSPLDAAVEcHR	1	1	HCD	N-Term(iTRAQ4plex), C19(Methylthio)	48.3026	5.90858	1	1	11653	Unique	Used	1.79468	4	625.064	2497.23	0.23159	57.1975	3742	3742	MS2	29/120	Plasma_iTRAQ_4_6.raw
																gi11321561	lLQDEFPGIPSPLDAAVEcHR	1	1	HCD	N-Term(iTRAQ4plex), C19(Methylthio)	74.8792	5.90105	1	1	7792	Unique	Used	1.32513	3	833.084	2497.24	1.99673	25.7905	2512	2512	MS2	29/80	Plasma_iTRAQ_6_8.raw
																gi11321561	lLQDEFPGIPSPLDAAVEcHR	1	1	HCD	N-Term(iTRAQ4plex), C19(Methylthio)	112.56	5.89314	1	1	12108	Unique	Used	1.55303	3	833.084	2497.24	1.85008	64.5187	4260	4260	MS2	30/80	Plasma_iTRAQ_4_6.raw
																gi11321561	lLQDEFPGIPSPLDAAVEcHR	1	1	HCD	N-Term(iTRAQ4plex), C19(Methylthio)	46.8478	5.89032	1	1	10628	Unique	Used	1.47277	3	833.084	2497.24	1.48347	39.753	2536	2536	MS2	24/80	Plasma_iTRAQ_4_6.raw
																gi11321561	lLQDEFPGIPSPLDAAVEcHR	1	1	HCD	N-Term(iTRAQ4plex), C19(Methylthio)	79.8943	5.87526	1	1	7924	Unique	Used	1.42916	3	833.085	2497.24	2.65664	27.1354	2653	2653	MS2	27/80	Plasma_iTRAQ_6_8.raw
																gi11321561	lLQDEFPGIPSPLDAAVEcHR	1	1	HCD	N-Term(iTRAQ4plex), C19(Methylthio)	82.4224	5.86728	1	1	7695	Unique	Used	1.2033	3	833.084	2497.24	1.92341	24.9757	2409	2409	MS2	29/80	Plasma_iTRAQ_6_8.raw
																gi11321561	lLQDEFPGIPSPLDAAVEcHR	1	1	HCD	N-Term(iTRAQ4plex), C19(Methylthio)	102.864	5.85463	1	1	10776	Unique	Used	1.5782	3	833.084	2497.24	1.63012	42.3598	2714	2714	MS2	26/80	Plasma_iTRAQ_4_6.raw
																gi11321561	lLQDEFPGIPSPLDAAVEcHR	1	1	HCD	N-Term(iTRAQ4plex), C19(Methylthio)	119.823	5.8402	1	1	13734	Unique	Used	1.7812	2	1249.11	2497.22	-5.37912	89.6949	6146	6146	MS2	25/40	Plasma_iTRAQ_4_6.raw
																gi11321561	lLQDEFPGIPSPLDAAVEcHR	1	1	HCD	N-Term(iTRAQ4plex), C19(Methylthio)	109.734	5.83433	1	1	17612	Unique	Used	2.61953	3	833.086	2497.24	3.53651	68.3054	6433	6433	MS2	32/80	Plasma_iTRAQ_6.raw
																gi11321561	lLQDEFPGIPSPLDAAVEcHR	1	1	HCD	N-Term(iTRAQ4plex), C19(Methylthio)	20.6749	5.81637	1	1	10324	Unique	Used	1.40057	3	833.084	2497.24	1.33682	34.7358	2187	2187	MS2	26/80	Plasma_iTRAQ_4_6.raw
																gi11321561	lLQDEFPGIPSPLDAAVEcHR	1	1	HCD	N-Term(iTRAQ4plex), C19(Methylthio)	105.621	5.80665	1	1	11731	Unique	Used	1.63167	3	833.084	2497.24	1.63012	58.4598	3830	3830	MS2	30/80	Plasma_iTRAQ_4_6.raw
																gi11321561	lLQDEFPGIPSPLDAAVEcHR	1	1	HCD	N-Term(iTRAQ4plex), C19(Methylthio)	88.4378	5.78595	1	1	11991	Unique	Used	1.59492	4	625.064	2497.23	0.133826	62.5945	4125	4125	MS2	30/120	Plasma_iTRAQ_4_6.raw
																gi11321561	lLQDEFPGIPSPLDAAVEcHR	1	1	HCD	N-Term(iTRAQ4plex), C19(Methylthio)	77.7093	5.76078	1	1	7638	Unique	Used	1.85249	3	833.083	2497.24	0.823561	24.5133	2348	2348	MS2	27/80	Plasma_iTRAQ_6_8.raw
																gi11321561	lLQDEFPGIPSPLDAAVEcHR	1	1	HCD	N-Term(iTRAQ4plex), C19(Methylthio)	96.4946	5.7578	1	1	8062	Unique	Used	1.46561	3	833.084	2497.24	1.33682	28.4153	2800	2800	MS2	28/80	Plasma_iTRAQ_6_8.raw
																gi11321561	lLQDEFPGIPSPLDAAVEcHR	1	1	HCD	N-Term(iTRAQ4plex), C19(Methylthio)	117.605	5.74863	1	1	12958	Unique	Used	2.00371	2	1249.12	2497.23	-1.37076	77.1639	5236	5236	MS2	25/40	Plasma_iTRAQ_4_6.raw
																gi11321561	lLQDEFPGIPSPLDAAVEcHR	1	1	HCD	N-Term(iTRAQ4plex), C19(Methylthio)	127.113	5.71842	1	1	17631	Unique	Used	5.0828	4	625.065	2497.24	1.40476	68.6417	6461	6461	MS2	32/120	Plasma_iTRAQ_6.raw
																gi11321561	lLQDEFPGIPSPLDAAVEcHR	1	1	HCD	N-Term(iTRAQ4plex), C19(Methylthio)	88.9645	5.71083	1	1	11906	Unique	Used	1.07072	4	625.064	2497.24	0.818176	61.2551	4029	4029	MS2	31/120	Plasma_iTRAQ_4_6.raw
																gi11321561	lLQDEFPGIPSPLDAAVEcHR	1	1	HCD	N-Term(iTRAQ4plex), C19(Methylthio)	77.5633	5.70225	1	1	7788	Unique	Used	1.64253	3	833.084	2497.24	1.99673	25.7544	2508	2508	MS2	29/80	Plasma_iTRAQ_6_8.raw
																gi11321561	lLQDEFPGIPSPLDAAVEcHR	1	1	HCD	N-Term(iTRAQ4plex), C19(Methylthio)	95.0677	5.68303	1	1	18724	Unique	Used	1.5327	3	833.084	2497.24	1.70344	84.123	7830	7830	MS2	25/80	Plasma_iTRAQ_6.raw
																gi11321561	lLQDEFPGIPSPLDAAVEcHR	1	1	HCD	N-Term(iTRAQ4plex), C19(Methylthio)	48.4418	5.66364	1	1	10141	Unique	Used	1.12218	3	833.084	2497.24	1.55679	31.6694	1976	1976	MS2	26/80	Plasma_iTRAQ_4_6.raw
																gi11321561	lLQDEFPGIPSPLDAAVEcHR	1	1	HCD	N-Term(iTRAQ4plex), C19(Methylthio)	70.7983	5.64222	1	1	7933	Unique	Used	1.60426	3	833.084	2497.24	1.41015	27.2275	2663	2663	MS2	25/80	Plasma_iTRAQ_6_8.raw
																gi11321561	lLQDEFPGIPSPLDAAVEcHR	1	1	HCD	N-Term(iTRAQ4plex), C19(Methylthio)	17.5669	5.63381	1	1	10480	Unique	Used	1.46132	3	833.084	2497.24	1.77676	37.2735	2363	2363	MS2	23/80	Plasma_iTRAQ_4_6.raw
																gi11321561	lLQDEFPGIPSPLDAAVEcHR	1	1	HCD	N-Term(iTRAQ4plex), C19(Methylthio)	97.5266	5.63246	1	1	11814	Unique	Used	1.53105	4	625.064	2497.23	0.427119	59.7184	3923	3923	MS2	28/120	Plasma_iTRAQ_4_6.raw
																gi11321561	lLQDEFPGIPSPLDAAVEcHR	1	1	HCD	N-Term(iTRAQ4plex), C19(Methylthio)	106.622	5.62786	1	1	10648	Unique	Used	1.35197	3	833.084	2497.24	1.77676	86.4354	6304	6304	MS2	25/80	Plasma_iTRAQ_8.raw
																gi11321561	lLQDEFPGIPSPLDAAVEcHR	1	1	HCD	N-Term(iTRAQ4plex), C19(Methylthio)	59.0794	5.55251	1	1	7637	Unique	Used	1.61871	3	833.083	2497.24	0.823561	24.5062	2347	2347	MS2	27/80	Plasma_iTRAQ_6_8.raw
																gi11321561	lLQDEFPGIPSPLDAAVEcHR	1	1	HCD	N-Term(iTRAQ4plex), C19(Methylthio)	137.843	5.54515	1	1	17919	Unique	Used	1.85914	2	1249.12	2497.24	0.975592	73.3283	6866	6866	MS2	22/40	Plasma_iTRAQ_6.raw
																gi11321561	lLQDEFPGIPSPLDAAVEcHR	1	1	HCD	N-Term(iTRAQ4plex), C19(Methylthio)	82.0225	5.53521	1	1	7640	Unique	Used	1.38392	3	833.083	2497.24	0.823561	24.5275	2350	2350	MS2	28/80	Plasma_iTRAQ_6_8.raw
																gi11321561	lLQDEFPGIPSPLDAAVEcHR	1	1	HCD	N-Term(iTRAQ4plex), C19(Methylthio)	129.085	5.52068	1	1	17826	Unique	Used	1.70702	2	1249.12	2497.23	-0.099816	71.8302	6737	6737	MS2	26/40	Plasma_iTRAQ_6.raw
																gi11321561	lLQDEFPGIPSPLDAAVEcHR	1	1	HCD	N-Term(iTRAQ4plex), C19(Methylthio)	27.0677	5.5135	1	1	10402	Unique	Used	1.41844	3	833.084	2497.24	1.33682	35.9945	2274	2274	MS2	24/80	Plasma_iTRAQ_4_6.raw
																gi11321561	lLQDEFPGIPSPLDAAVEcHR	1	1	HCD	N-Term(iTRAQ4plex), C19(Methylthio)	21.519	5.42546	1	1	10217	Unique	Used	1.31156	3	833.083	2497.24	0.823561	32.928	2063	2063	MS2	23/80	Plasma_iTRAQ_4_6.raw
																gi11321561	lLQDEFPGIPSPLDAAVEcHR	1	1	HCD	N-Term(iTRAQ4plex), C19(Methylthio)	108.601	5.41021	1	1	11577	Unique	Used	1.59042	3	833.084	2497.24	1.33682	55.9536	3655	3655	MS2	28/80	Plasma_iTRAQ_4_6.raw
																gi11321561	lLQDEFPGIPSPLDAAVEcHR	1	1	HCD	N-Term(iTRAQ4plex), C19(Methylthio)	86.875	5.33282	1	1	7701	Unique	Used	1.53603	3	833.084	2497.24	1.92341	25.0191	2415	2415	MS2	27/80	Plasma_iTRAQ_6_8.raw
																gi11321561	lLQDEFPGIPSPLDAAVEcHR	1	1	HCD	N-Term(iTRAQ4plex), C19(Methylthio)	105.318	5.28235	1	1	10825	Unique	Used	0.882829	3	833.084	2497.24	1.55679	90.6249	6567	6567	MS2	26/80	Plasma_iTRAQ_8.raw
																gi11321561	lLQDEFPGIPSPLDAAVEcHR	1	1	HCD	N-Term(iTRAQ4plex), C19(Methylthio)	99.2452	5.24815	1	1	10920	Unique	Used	1.71019	3	833.084	2497.24	1.70344	44.8961	2890	2890	MS2	30/80	Plasma_iTRAQ_4_6.raw
																gi11321561	lLqDEFPGIPSPLDAAVEcHR	1	1	HCD	N-Term(iTRAQ4plex), Q3(Deamidated), C19(Methylthio)	72.6388	5.24691	1	1	17870	Unique	Used	1.99359	2	1249.62	2498.24	9.23008	72.5348	6798	6798	MS2	22/40	Plasma_iTRAQ_6.raw
																gi11321561	lLQDEFPGIPSPLDAAVEcHR	1	1	HCD	N-Term(iTRAQ4plex), C19(Methylthio)	122.457	5.23435	1	1	17628	Unique	Used	1.86306	2	1249.12	2497.23	-0.00205152	68.5925	6457	6457	MS2	23/40	Plasma_iTRAQ_6.raw
																gi11321561	lLQDEFPGIPSPLDAAVEcHR	1	1	HCD	N-Term(iTRAQ4plex), C19(Methylthio)	127.324	5.21264	1	1	17560	Unique	Used	2.08125	2	1249.12	2497.24	0.584535	67.3773	6358	6358	MS2	26/40	Plasma_iTRAQ_6.raw
																gi11321561	lLQDEFPGIPSPLDAAVEcHR	1	1	HCD	N-Term(iTRAQ4plex), C19(Methylthio)	3.65882	5.21141	1	1	12831	Unique	Used	1.32575	3	833.083	2497.24	0.896884	75.6246	5088	5088	MS2	24/80	Plasma_iTRAQ_4_6.raw
																gi11321561	lLQDEFPGIPSPLDAAVEcHR	1	1	HCD	N-Term(iTRAQ4plex), C19(Methylthio)	11.6458	5.19418	1	1	12655	Unique	Used	1.6211	3	833.083	2497.23	0.456945	72.9614	4883	4883	MS2	24/80	Plasma_iTRAQ_4_6.raw
																gi11321561	lLQDEFPGIPSPLDAAVEcHR	1	1	HCD	N-Term(iTRAQ4plex), C19(Methylthio)	104.876	5.14599	1	1	14571	Unique	Used	1.20693	3	833.084	2497.24	1.55679	68.3624	6033	6033	MS2	30/80	Plasma_iTRAQ_7.raw
																gi11321561	lLQDEFPGIPSPLDAAVEcHR	1	1	HCD	N-Term(iTRAQ4plex), C19(Methylthio)	98.6347	5.08449	1	1	16992	Unique	Used	1.41468	3	833.086	2497.24	4.48971	60.4575	5652	5652	MS2	25/80	Plasma_iTRAQ_6.raw
																gi11321561	lLQDEFPGIPSPLDAAVEcHR	1	1	HCD	N-Term(iTRAQ4plex), C19(Methylthio)	106.161	4.95813	1	1	12740	Unique	Used	2.28159	2	1249.12	2497.23	0.0957129	74.2654	4981	4981	MS2	24/40	Plasma_iTRAQ_4_6.raw
																gi11321561	lLQDEFPGIPSPLDAAVEcHR	1	1	HCD	N-Term(iTRAQ4plex), C19(Methylthio)	31.1462	4.89199	1	1	9417	Unique	Used	1.09822	3	833.083	2497.23	0.310298	18.8004	1096	1096	MS2	24/80	Plasma_iTRAQ_4_6.raw
																gi11321561	lLQDEFPGIPSPLDAAVEcHR	1	1	HCD	N-Term(iTRAQ4plex), C19(Methylthio)	79.8683	4.87597	1	1	17479	Unique	Used	1.16053	4	625.065	2497.24	1.11147	66.2351	6253	6253	MS2	33/120	Plasma_iTRAQ_6.raw
																gi11321561	lLQDEFPGIPSPLDAAVEcHR	1	1	HCD	N-Term(iTRAQ4plex), C19(Methylthio)	40.1924	4.87489	1	1	17811	Unique	Used	1.54542	4	625.064	2497.24	0.818176	71.6567	6719	6719	MS2	27/120	Plasma_iTRAQ_6.raw
																gi11321561	lLQDEFPGIPSPLDAAVEcHR	1	1	HCD	N-Term(iTRAQ4plex), C19(Methylthio)	133.345	4.86381	1	1	11751	Unique	Used	2.03027	2	1249.12	2497.23	-0.295345	58.7135	3851	3851	MS2	25/40	Plasma_iTRAQ_4_6.raw
																gi11321561	lLQDEFPGIPSPLDAAVEcHR	1	1	HCD	N-Term(iTRAQ4plex), C19(Methylthio)	15.0527	4.81937	1	1	9950	Unique	Used	1.21244	3	833.084	2497.24	1.99673	28.5913	1760	1760	MS2	25/80	Plasma_iTRAQ_4_6.raw
																gi11321561	lLQDEFPGIPSPLDAAVEcHR	1	1	HCD	N-Term(iTRAQ4plex), C19(Methylthio)	119.14	4.80237	1	1	11823	Unique	Used	2.16403	2	1249.12	2497.24	0.780063	59.8579	3933	3933	MS2	23/40	Plasma_iTRAQ_4_6.raw
																gi11321561	lLQDEFPGIPSPLDAAVEcHR	1	1	HCD	N-Term(iTRAQ4plex), C19(Methylthio)	69.9915	4.79505	1	1	14589	Unique	Used	2.40095	4	625.065	2497.24	2.18687	68.6882	6060	6060	MS2	31/120	Plasma_iTRAQ_7.raw
																gi11321561	lLQDEFPGIPSPLDAAVEcHR	1	1	HCD	N-Term(iTRAQ4plex), C19(Methylthio)	74.618	4.7929	1	1	7702	Unique	Used	1.2364	3	833.084	2497.24	1.92341	25.0257	2416	2416	MS2	26/80	Plasma_iTRAQ_6_8.raw
																gi11321561	lLQDEFPGIPSPLDAAVEcHR	1	1	HCD	N-Term(iTRAQ4plex), C19(Methylthio)	92.1947	4.78935	1	1	15886	Unique	Used	1.01035	3	833.084	2497.24	1.63012	90.866	7779	7779	MS2	26/80	Plasma_iTRAQ_7.raw
																gi11321561	lLQDEFPGIPSPLDAAVEcHR	1	1	HCD	N-Term(iTRAQ4plex), C19(Methylthio)	125.61	4.73692	1	1	12078	Unique	Used	2.08005	2	1249.12	2497.23	-2.54393	64.008	4225	4225	MS2	24/40	Plasma_iTRAQ_4_6.raw
																gi11321561	lLQDEFPGIPSPLDAAVEcHR	1	1	HCD	N-Term(iTRAQ4plex), C19(Methylthio)	97.0203	4.61958	1	1	9209	Unique	Used	1.82561	3	833.084	2497.24	1.33682	14.0723	789	789	MS2	27/80	Plasma_iTRAQ_4_6.raw
																gi11321561	lLQDEFPGIPSPLDAAVEcHR	1	1	HCD	N-Term(iTRAQ4plex), C19(Methylthio)	92.5551	4.57466	1	1	11994	Unique	Used	2.17372	2	1249.12	2497.24	1.36665	62.6324	4128	4128	MS2	23/40	Plasma_iTRAQ_4_6.raw
																gi11321561	lLQDEFPGIPSPLDAAVEcHR	1	1	HCD	N-Term(iTRAQ4plex), C19(Methylthio)	109.334	4.47169	1	1	9065	Unique	Used	2.49565	3	833.084	2497.24	1.11685	4.32453	243	243	MS2	27/80	Plasma_iTRAQ_4_6.raw
																gi11321561	lLQDEFPGIPSPLDAAVEcHR	1	1	HCD	N-Term(iTRAQ4plex), C19(Methylthio)	11.1058	4.3491	1	1	9509	Unique	Used	0.956026	3	833.084	2497.24	0.970207	20.4368	1208	1208	MS2	24/80	Plasma_iTRAQ_4_6.raw
																gi11321561	lLQDEFPGIPSPLDAAVEcHR	1	1	HCD	N-Term(iTRAQ4plex), C19(Methylthio)	19.095	4.20282	1	1	11579	Unique	Used	1.1554	4	625.064	2497.24	0.622648	55.9699	3657	3657	MS2	21/120	Plasma_iTRAQ_4_6.raw
																gi11321561	lLQDEFPGIPSPLDAAVEcHR	1	1	HCD	N-Term(iTRAQ4plex), C19(Methylthio)	35.4541	4.13742	1	1	17738	Unique	Used	2.16208	4	625.065	2497.24	1.0137	70.4199	6614	6614	MS2	23/120	Plasma_iTRAQ_6.raw
																gi11321561	lLQDEFPGIPSPLDAAVEcHR	1	1	HCD	N-Term(iTRAQ4plex), C19(Methylthio)	53.2259	4.09426	1	1	11667	Unique	Used	2.5876	2	1249.12	2497.23	-2.6417	57.4067	3757	3757	MS2	18/40	Plasma_iTRAQ_4_6.raw
																gi11321561	lLQDEFPGIPSPLDAAVEcHR	1	1	HCD	N-Term(iTRAQ4plex), C19(Methylthio)	1	3.76168	1	1	9599	Unique	Used	1.25888	3	833.085	2497.24	2.29002	22.0402	1318	1318	MS2	16/80	Plasma_iTRAQ_4_6.raw
																gi11321561	lWWLDLk	1	1	HCD	N-Term(iTRAQ4plex), K7(iTRAQ4plex)	14.3551	3.22772	1	1	11028	Unique	Used	2.01269	2	631.382	1261.76	1.12051	46.7193	3016	3016	MS2	11/12	Plasma_iTRAQ_4_6.raw
																gi11321561	lWWLDLk	1	1	HCD	N-Term(iTRAQ4plex), K7(iTRAQ4plex)	14.1716	3.10819	1	1	17723	Unique	Used	1.93537	2	631.381	1261.76	0.443289	74.4214	6811	6811	MS2	11/12	Plasma_iTRAQ_5.raw
																gi11321561	lWWLDLk	1	1	HCD	N-Term(iTRAQ4plex), K7(iTRAQ4plex)	15.6617	3.10049	1	1	17628	Unique	Used	2.0794	2	631.382	1261.76	1.21726	73.0191	6701	6701	MS2	11/12	Plasma_iTRAQ_5.raw
																gi11321561	lWWLDLk	1	1	HCD	N-Term(iTRAQ4plex), K7(iTRAQ4plex)	16.0474	3.07917	1	1	11246	Unique	Used	1.97644	2	631.382	1261.76	1.31401	50.4269	3270	3270	MS2	11/12	Plasma_iTRAQ_4_6.raw
																gi11321561	lWWLDLk	1	1	HCD	N-Term(iTRAQ4plex), K7(iTRAQ4plex)	14.7518	3.05396	1	1	19069	Unique	Used	1.89102	2	631.381	1261.75	-0.620922	88.7754	8206	8206	MS2	11/12	Plasma_iTRAQ_6.raw
																gi11321561	lWWLDLk	1	1	HCD	N-Term(iTRAQ4plex), K7(iTRAQ4plex)	18.6634	3.04657	1	1	11101	Unique	Used	1.96257	2	631.381	1261.76	0.540035	48.0076	3103	3103	MS2	11/12	Plasma_iTRAQ_4_6.raw
																gi11321561	lWWLDLk	1	1	HCD	N-Term(iTRAQ4plex), K7(iTRAQ4plex)	18.4092	3.03844	1	1	12822	Unique	Used	2.10409	2	631.381	1261.76	0.636782	75.4719	5076	5076	MS2	11/12	Plasma_iTRAQ_4_6.raw
																gi11321561	lWWLDLk	1	1	HCD	N-Term(iTRAQ4plex), K7(iTRAQ4plex)	13.461	3.02393	1	1	10876	Unique	Used	1.84434	2	631.38	1261.75	-0.814416	44.1446	2839	2839	MS2	11/12	Plasma_iTRAQ_4_6.raw
																gi11321561	lWWLDLk	1	1	HCD	N-Term(iTRAQ4plex), K7(iTRAQ4plex)	19.2339	3.00104	1	1	10802	Unique	Used	1.80464	2	631.381	1261.76	0.443289	42.8202	2747	2747	MS2	11/12	Plasma_iTRAQ_4_6.raw
																gi11321561	lWWLDLk	1	1	HCD	N-Term(iTRAQ4plex), K7(iTRAQ4plex)	15.8079	2.98507	1	1	11321	Unique	Used	1.90158	2	631.38	1261.75	-1.00791	51.6448	3355	3355	MS2	10/12	Plasma_iTRAQ_4_6.raw
																gi11321561	lWWLDLk	1	1	HCD	N-Term(iTRAQ4plex), K7(iTRAQ4plex)	16.1477	2.93995	1	1	10953	Unique	Used	2.08267	2	631.381	1261.76	0.540035	45.4512	2929	2929	MS2	11/12	Plasma_iTRAQ_4_6.raw
																gi11321561	lWWLDLk	1	1	HCD	N-Term(iTRAQ4plex), K7(iTRAQ4plex)	31.653	2.75817	1	1	17458	Unique	Used	2.26246	1	1261.75	1261.75	-0.465146	65.9783	6227	6227	MS2	9/12	Plasma_iTRAQ_6.raw
																gi11321561	lYLVQGTQVYVFLTk	1	1	HCD	N-Term(iTRAQ4plex), K15(iTRAQ4plex)	81.2868	6.89627	1	1	8459	Unique	Used	1.2836	2	1030.61	2060.2	-0.138191	31.9796	3224	3224	MS2	24/28	Plasma_iTRAQ_6_8.raw
																gi11321561	lyLVQGTQVYVFLTk	1	1	HCD	N-Term(iTRAQ4plex), Y2(iTRAQ4plex), K15(iTRAQ4plex)	77.5617	6.80158	1	1	14022	Unique	Used	1.11773	3	735.441	2204.31	0.883694	59.4982	5253	5253	MS2	25/56	Plasma_iTRAQ_7.raw
																gi11321561	lYLVQGTQVYVFLTk	1	1	HCD	N-Term(iTRAQ4plex), K15(iTRAQ4plex)	80.198	6.78569	1	1	8463	Unique	Used	1.18296	2	1030.61	2060.2	-0.138191	32.0136	3228	3228	MS2	24/28	Plasma_iTRAQ_6_8.raw
																gi11321561	lYLVQGTQVYVFLTk	1	1	HCD	N-Term(iTRAQ4plex), K15(iTRAQ4plex)	81.6053	6.75965	1	1	8447	Unique	Used	1.13553	2	1030.61	2060.21	1.16534	31.8814	3211	3211	MS2	24/28	Plasma_iTRAQ_6_8.raw
																gi11321561	lYLVQGTQVYVFLTk	1	1	HCD	N-Term(iTRAQ4plex), K15(iTRAQ4plex)	87.6904	6.28414	1	1	8445	Unique	Used	1.38612	2	1030.61	2060.21	1.16534	31.8684	3209	3209	MS2	24/28	Plasma_iTRAQ_6_8.raw
																gi11321561	lYLVQGTQVYVFLTk	1	1	HCD	N-Term(iTRAQ4plex), K15(iTRAQ4plex)	84.7784	6.23085	1	1	13977	Unique	Used	1.21498	3	687.407	2060.21	0.981062	75.5585	5081	5081	MS2	23/56	Plasma_iTRAQ_1_3.raw
																gi11321561	lYLVQGTQVYVFLTk	1	1	HCD	N-Term(iTRAQ4plex), K15(iTRAQ4plex)	74.2193	6.1566	1	1	8534	Unique	Used	0.965165	3	687.41	2060.21	5.4249	32.6863	3304	3304	MS2	23/56	Plasma_iTRAQ_6_8.raw
																gi11321561	lYLVQGTQVYVFLTk	1	1	HCD	N-Term(iTRAQ4plex), K15(iTRAQ4plex)	89.0302	6.13306	1	1	8471	Unique	Used	1.32128	3	687.407	2060.21	1.33657	32.096	3237	3237	MS2	25/56	Plasma_iTRAQ_6_8.raw
																gi11321561	lYLVQGTQVYVFLTk	1	1	HCD	N-Term(iTRAQ4plex), K15(iTRAQ4plex)	88.1588	6.11463	1	1	8439	Unique	Used	1.02162	3	687.407	2060.21	1.15882	31.8322	3203	3203	MS2	25/56	Plasma_iTRAQ_6_8.raw
																gi11321561	lYLVQGTQVYVFLTk	1	1	HCD	N-Term(iTRAQ4plex), K15(iTRAQ4plex)	40.9428	6.11261	1	1	8466	Unique	Used	1.24023	2	1030.61	2060.2	-0.138191	32.0403	3231	3231	MS2	22/28	Plasma_iTRAQ_6_8.raw
																gi11321561	lYLVQGTQVYVFLTk	1	1	HCD	N-Term(iTRAQ4plex), K15(iTRAQ4plex)	76.3575	6.06732	1	1	14749	Unique	Used	0.968016	2	1030.61	2060.2	-0.0196877	71.6522	6302	6302	MS2	19/28	Plasma_iTRAQ_7.raw
																gi11321561	lYLVQGTQVYVFLTk	1	1	HCD	N-Term(iTRAQ4plex), K15(iTRAQ4plex)	98.7789	5.92606	1	1	8473	Unique	Used	0.865619	3	687.407	2060.21	1.33657	32.1091	3239	3239	MS2	25/56	Plasma_iTRAQ_6_8.raw
																gi11321561	lYLVQGTQVYVFLTk	1	1	HCD	N-Term(iTRAQ4plex), K15(iTRAQ4plex)	79.1107	5.86337	1	1	8488	Unique	Used	1.09703	3	687.407	2060.21	1.78096	32.2374	3255	3255	MS2	26/56	Plasma_iTRAQ_6_8.raw
																gi11321561	lYLVQGTQVYVFLTk	1	1	HCD	N-Term(iTRAQ4plex), K15(iTRAQ4plex)	86.2309	5.82631	1	1	8433	Unique	Used	1.28747	2	1030.61	2060.21	1.99486	31.7758	3196	3196	MS2	22/28	Plasma_iTRAQ_6_8.raw
																gi11321561	lYLVQGTQVYVFLTk	1	1	HCD	N-Term(iTRAQ4plex), K15(iTRAQ4plex)	77.893	5.79999	1	1	8440	Unique	Used	1.54501	3	687.407	2060.21	1.15882	31.838	3204	3204	MS2	22/56	Plasma_iTRAQ_6_8.raw
																gi11321561	lYLVQGTQVYVFLTk	1	1	HCD	N-Term(iTRAQ4plex), K15(iTRAQ4plex)	88.1983	5.75254	1	1	8435	Unique	Used	1.14593	2	1030.61	2060.21	1.99486	31.7871	3198	3198	MS2	23/28	Plasma_iTRAQ_6_8.raw
																gi11321561	lYLVQGTQVYVFLTk	1	1	HCD	N-Term(iTRAQ4plex), K15(iTRAQ4plex)	56.5623	5.71337	1	1	17742	Unique	Used	0.979016	3	687.408	2060.21	3.20299	70.4446	6618	6618	MS2	23/56	Plasma_iTRAQ_6.raw
																gi11321561	lYLVQGTQVYVFLTk	1	1	HCD	N-Term(iTRAQ4plex), K15(iTRAQ4plex)	87.4255	5.70079	1	1	8489	Unique	Used	0.998636	3	687.407	2060.21	1.78096	32.2438	3256	3256	MS2	25/56	Plasma_iTRAQ_6_8.raw
																gi11321561	lYLVQGTQVYVFLTk	1	1	HCD	N-Term(iTRAQ4plex), K15(iTRAQ4plex)	84.5172	5.69649	1	1	8438	Unique	Used	1.10149	3	687.407	2060.21	1.15882	31.8289	3202	3202	MS2	25/56	Plasma_iTRAQ_6_8.raw
																gi11321561	lYLVQGTQVYVFLTk	1	1	HCD	N-Term(iTRAQ4plex), K15(iTRAQ4plex)	45.6808	5.66484	1	1	8491	Unique	Used	0.883075	3	687.407	2060.21	1.78096	32.2565	3258	3258	MS2	24/56	Plasma_iTRAQ_6_8.raw
																gi11321561	lYLVQGTQVYVFLTk	1	1	HCD	N-Term(iTRAQ4plex), K15(iTRAQ4plex)	54.8532	5.66288	1	1	14862	Unique	Used	1.30784	3	687.406	2060.2	-0.618731	73.9867	6481	6481	MS2	23/56	Plasma_iTRAQ_7.raw
																gi11321561	lYLVQGTQVYVFLTk	1	1	HCD	N-Term(iTRAQ4plex), K15(iTRAQ4plex)	84.3671	5.65181	1	1	8616	Unique	Used	0.967763	3	687.407	2060.21	0.803307	33.5006	3391	3391	MS2	23/56	Plasma_iTRAQ_6_8.raw
																gi11321561	lYLVQGTQVYVFLTk	1	1	HCD	N-Term(iTRAQ4plex), K15(iTRAQ4plex)	78.4626	5.60316	1	1	8475	Unique	Used	1.28731	3	687.407	2060.21	1.33657	32.1214	3241	3241	MS2	22/56	Plasma_iTRAQ_6_8.raw
																gi11321561	lYLVQGTQVYVFLTk	1	1	HCD	N-Term(iTRAQ4plex), K15(iTRAQ4plex)	76.2548	5.56001	1	1	8424	Unique	Used	1.21378	3	687.408	2060.21	3.20299	31.7254	3187	3187	MS2	27/56	Plasma_iTRAQ_6_8.raw
																gi11321561	lYLVQGTQVYVFLTk	1	1	HCD	N-Term(iTRAQ4plex), K15(iTRAQ4plex)	76.4818	5.33159	1	1	14791	Unique	Used	1.22348	3	687.408	2060.21	3.55849	72.4933	6368	6368	MS2	22/56	Plasma_iTRAQ_7.raw
																gi11321561	lYLVQGTQVYVFLTk	1	1	HCD	N-Term(iTRAQ4plex), K15(iTRAQ4plex)	80.3711	5.30332	1	1	8425	Unique	Used	1.44147	3	687.408	2060.21	3.20299	31.7309	3188	3188	MS2	26/56	Plasma_iTRAQ_6_8.raw
																gi11321561	lYLVQGTQVYVFLTk	1	1	HCD	N-Term(iTRAQ4plex), K15(iTRAQ4plex)	80.2405	5.20882	1	1	8428	Unique	Used	1.10309	3	687.408	2060.21	3.20299	31.7477	3191	3191	MS2	25/56	Plasma_iTRAQ_6_8.raw
																gi11321561	lYLVQGTQVYVFLTk	1	1	HCD	N-Term(iTRAQ4plex), K15(iTRAQ4plex)	8.4024	4.4383	1	1	15085	Unique	Used	1.43271	3	687.409	2060.21	4.18063	78.0947	6819	6819	MS2	16/56	Plasma_iTRAQ_7.raw
																gi11321561	lYLVQGTQVYVFLTk	1	1	HCD	N-Term(iTRAQ4plex), K15(iTRAQ4plex)	45.8386	4.42221	1	1	8452	Unique	Used	2.0635	3	687.407	2060.21	1.15882	31.9154	3216	3216	MS2	20/56	Plasma_iTRAQ_6_8.raw
																gi11321561	lYLVQGTQVYVFLTk	1	1	HCD	N-Term(iTRAQ4plex), K15(iTRAQ4plex)	39.5095	4.36008	1	1	8436	Unique	Used	0.01	3	687.408	2060.21	3.20299	31.793	3199	3199	MS2	17/56	Plasma_iTRAQ_6_8.raw
																gi11321561	lYLVQGTQVyVFLTk	1	1	HCD	N-Term(iTRAQ4plex), Y10(iTRAQ4plex), K15(iTRAQ4plex)	2.42443	4.31472	1	1	15151	Unique	Used	1.12748	3	735.426	2204.26	-19.6343	79.3908	6915	6915	MS2	15/56	Plasma_iTRAQ_7.raw
																gi11321561	nFPSPVDAAFR	1	1	HCD	N-Term(iTRAQ4plex)	13.0636	4.36115	1	1	15741	Unique	Used	1.61697	1	1364.71	1364.71	0.829595	48.4697	4452	4452	MS2	13/20	Plasma_iTRAQ_4.raw
																gi11321561	nFPSPVDAAFR	1	1	HCD	N-Term(iTRAQ4plex)	6.2719	4.25119	1	1	15849	Unique	Used	1.5283	1	1364.71	1364.71	0.471803	49.6732	4574	4574	MS2	13/20	Plasma_iTRAQ_4.raw
																gi11321561	nFPSPVDAAFR	1	1	HCD	N-Term(iTRAQ4plex)	47.8548	4.12465	1	1	15746	Unique	Used	1.45644	3	455.574	1364.71	-1.11324	48.505	4457	4457	MS2	19/40	Plasma_iTRAQ_4.raw
																gi11321561	nFPSPVDAAFR	1	1	HCD	N-Term(iTRAQ4plex)	59.7459	4.09512	1	1	15852	Unique	Used	1.42386	3	455.575	1364.71	2.10688	49.6924	4577	4577	MS2	19/40	Plasma_iTRAQ_4.raw
																gi11321561	nFPSPVDAAFR	1	1	HCD	N-Term(iTRAQ4plex)	13.4466	4.0776	1	1	16253	Unique	Used	1.4057	2	682.86	1364.71	2.92176	53.8598	5014	5014	MS2	15/20	Plasma_iTRAQ_4.raw
																gi11321561	nFPSPVDAAFR	1	1	HCD	N-Term(iTRAQ4plex)	13.528	4.07667	1	1	10162	Unique	Used	1.4229	2	682.858	1364.71	0.68557	15.6156	899	899	MS2	15/20	Plasma_iTRAQ_1_3.raw
																gi11321561	nFPSPVDAAFR	1	1	HCD	N-Term(iTRAQ4plex)	17.2157	4.03446	1	1	12706	Unique	Used	1.34794	2	682.859	1364.71	1.66949	55.4473	3684	3684	MS2	15/20	Plasma_iTRAQ_1_3.raw
																gi11321561	nFPSPVDAAFR	1	1	HCD	N-Term(iTRAQ4plex), N1(Deamidated)	13.9618	4.02002	1	1	16161	Unique	Used	1.25756	2	683.35	1365.69	1.2161	52.9737	4915	4915	MS2	16/20	Plasma_iTRAQ_4.raw
																gi11321561	nFPSPVDAAFR	1	1	HCD	N-Term(iTRAQ4plex)	11.5842	3.99721	1	1	15825	Unique	Used	1.44916	2	682.86	1364.71	3.01121	49.3887	4546	4546	MS2	15/20	Plasma_iTRAQ_4.raw
																gi11321561	nFPSPVDAAFR	1	1	HCD	N-Term(iTRAQ4plex)	13.1389	3.97184	1	1	11483	Unique	Used	1.37341	2	682.858	1364.71	0.775018	54.3454	3544	3544	MS2	14/20	Plasma_iTRAQ_4_6.raw
																gi11321561	nFPSPVDAAFR	1	1	HCD	N-Term(iTRAQ4plex)	19.2219	3.95077	1	1	13907	Unique	Used	1.36905	2	682.859	1364.71	1.3117	74.4472	5002	5002	MS2	15/20	Plasma_iTRAQ_1_3.raw
																gi11321561	nFPSPVDAAFR	1	1	HCD	N-Term(iTRAQ4plex)	6.0874	3.94611	1	1	17803	Unique	Used	1.34594	2	682.858	1364.71	0.417226	73.2977	6756	6756	MS2	15/20	Plasma_iTRAQ_4.raw
																gi11321561	nFPSPVDAAFR	1	1	HCD	N-Term(iTRAQ4plex), N1(Deamidated)	15.4045	3.94438	1	1	16049	Unique	Used	1.42999	2	683.35	1365.69	1.03733	51.7674	4794	4794	MS2	15/20	Plasma_iTRAQ_4.raw
																gi11321561	nFPSPVDAAFR	1	1	HCD	N-Term(iTRAQ4plex)	14.9301	3.93916	1	1	14901	Unique	Used	1.4024	2	682.859	1364.71	1.40115	89.5664	6109	6109	MS2	14/20	Plasma_iTRAQ_1_3.raw
																gi11321561	nFPSPVDAAFR	1	1	HCD	N-Term(iTRAQ4plex)	15.2741	3.93054	1	1	18853	Unique	Used	1.37565	2	682.858	1364.71	0.596122	89.1768	7963	7963	MS2	16/20	Plasma_iTRAQ_4.raw
																gi11321561	nFPSPVDAAFR	1	1	HCD	N-Term(iTRAQ4plex)	16.6345	3.92437	1	1	14085	Unique	Used	1.37209	2	682.858	1364.71	1.22226	76.973	5200	5200	MS2	15/20	Plasma_iTRAQ_1_3.raw
																gi11321561	nFPSPVDAAFR	1	1	HCD	N-Term(iTRAQ4plex)	16.9656	3.89576	1	1	14147	Unique	Used	1.39701	2	682.858	1364.71	0.417226	78.1788	5280	5280	MS2	15/20	Plasma_iTRAQ_1_3.raw
																gi11321561	nFPSPVDAAFR	1	1	HCD	N-Term(iTRAQ4plex)	14.712	3.88885	1	1	14211	Unique	Used	1.41586	2	682.859	1364.71	1.40115	79.3912	5358	5358	MS2	14/20	Plasma_iTRAQ_1_3.raw
																gi11321561	nFPSPVDAAFR	1	1	HCD	N-Term(iTRAQ4plex)	12.8578	3.86874	1	1	12291	Unique	Used	1.24557	2	682.859	1364.71	1.4906	67.457	4472	4472	MS2	14/20	Plasma_iTRAQ_4_6.raw
																gi11321561	nFPSPVDAAFR	1	1	HCD	N-Term(iTRAQ4plex)	16.2556	3.85954	1	1	12986	Unique	Used	1.38978	2	682.859	1364.71	1.40115	59.7089	3986	3986	MS2	14/20	Plasma_iTRAQ_1_3.raw
																gi11321561	nFPSPVDAAFR	1	1	HCD	N-Term(iTRAQ4plex)	14.8003	3.85554	1	1	12368	Unique	Used	1.41295	2	682.858	1364.71	0.506674	68.6833	4560	4560	MS2	16/20	Plasma_iTRAQ_4_6.raw
																gi11321561	nFPSPVDAAFR	1	1	HCD	N-Term(iTRAQ4plex)	11.9148	3.85068	1	1	14966	Unique	Used	1.46908	2	682.858	1364.71	0.775018	90.7554	6188	6188	MS2	15/20	Plasma_iTRAQ_1_3.raw
																gi11321561	nFPSPVDAAFR	1	1	HCD	N-Term(iTRAQ4plex)	14.8114	3.84622	1	1	12889	Unique	Used	1.40741	2	682.858	1364.71	1.13281	58.2264	3881	3881	MS2	14/20	Plasma_iTRAQ_1_3.raw
																gi11321561	nFPSPVDAAFR	1	1	HCD	N-Term(iTRAQ4plex)	15.1163	3.83796	1	1	15707	Unique	Used	1.46383	2	682.859	1364.71	2.02729	48.1949	4416	4416	MS2	14/20	Plasma_iTRAQ_4.raw
																gi11321561	nFPSPVDAAFR	1	1	HCD	N-Term(iTRAQ4plex)	4.98079	3.83685	1	1	17513	Unique	Used	1.29212	2	682.857	1364.71	-0.745597	69.1102	6417	6417	MS2	14/20	Plasma_iTRAQ_4.raw
																gi11321561	nFPSPVDAAFR	1	1	HCD	N-Term(iTRAQ4plex)	15.6934	3.83681	1	1	12365	Unique	Used	1.32092	2	682.858	1364.71	1.04336	50.2059	3311	3311	MS2	14/20	Plasma_iTRAQ_1_3.raw
																gi11321561	nFPSPVDAAFR	1	1	HCD	N-Term(iTRAQ4plex)	13.47	3.83384	1	1	17317	Unique	Used	1.3514	2	682.859	1364.71	1.40115	66.4111	6193	6193	MS2	15/20	Plasma_iTRAQ_4.raw
																gi11321561	nFPSPVDAAFR	1	1	HCD	N-Term(iTRAQ4plex)	16.9547	3.83371	1	1	13523	Unique	Used	1.40025	2	682.858	1364.71	0.953913	68.1553	4572	4572	MS2	16/20	Plasma_iTRAQ_1_3.raw
																gi11321561	nFPSPVDAAFR	1	1	HCD	N-Term(iTRAQ4plex)	14.9005	3.83195	1	1	14461	Unique	Used	1.36944	2	682.858	1364.71	0.953913	83.3061	5632	5632	MS2	16/20	Plasma_iTRAQ_1_3.raw
																gi11321561	nFPSPVDAAFR	1	1	HCD	N-Term(iTRAQ4plex)	16.2808	3.83131	1	1	18912	Unique	Used	1.44572	2	682.858	1364.71	1.22226	90.3845	8041	8041	MS2	15/20	Plasma_iTRAQ_4.raw
																gi11321561	nFPSPVDAAFR	1	1	HCD	N-Term(iTRAQ4plex)	17.295	3.82634	1	1	13328	Unique	Used	1.34157	2	682.858	1364.71	1.22226	65.0517	4357	4357	MS2	15/20	Plasma_iTRAQ_1_3.raw
																gi11321561	nFPSPVDAAFR	1	1	HCD	N-Term(iTRAQ4plex)	19.0717	3.82382	1	1	13834	Unique	Used	1.45059	2	682.858	1364.71	1.04336	73.233	4919	4919	MS2	14/20	Plasma_iTRAQ_1_3.raw
																gi11321561	nFPSPVDAAFR	1	1	HCD	N-Term(iTRAQ4plex)	14.9709	3.82182	1	1	13753	Unique	Used	1.37501	2	682.859	1364.71	1.3117	71.9683	4830	4830	MS2	15/20	Plasma_iTRAQ_1_3.raw
																gi11321561	nFPSPVDAAFR	1	1	HCD	N-Term(iTRAQ4plex)	13.473	3.80685	1	1	12214	Unique	Used	1.40495	2	682.858	1364.71	1.13281	47.837	3147	3147	MS2	14/20	Plasma_iTRAQ_1_3.raw
																gi11321561	nFPSPVDAAFR	1	1	HCD	N-Term(iTRAQ4plex)	15.1744	3.80355	1	1	13163	Unique	Used	1.33438	2	682.858	1364.71	0.68557	62.4607	4178	4178	MS2	15/20	Plasma_iTRAQ_1_3.raw
																gi11321561	nFPSPVDAAFR	1	1	HCD	N-Term(iTRAQ4plex)	16.6209	3.79836	1	1	13670	Unique	Used	1.41169	2	682.859	1364.71	1.4906	70.6029	4738	4738	MS2	15/20	Plasma_iTRAQ_1_3.raw
																gi11321561	nFPSPVDAAFR	1	1	HCD	N-Term(iTRAQ4plex)	12.9086	3.79811	1	1	17888	Unique	Used	1.36553	2	682.859	1364.71	1.3117	74.5132	6851	6851	MS2	14/20	Plasma_iTRAQ_4.raw
																gi11321561	nFPSPVDAAFR	1	1	HCD	N-Term(iTRAQ4plex)	14.0686	3.79549	1	1	13070	Unique	Used	1.36321	2	682.858	1364.71	1.13281	60.9955	4076	4076	MS2	14/20	Plasma_iTRAQ_1_3.raw
																gi11321561	nFPSPVDAAFR	1	1	HCD	N-Term(iTRAQ4plex)	9.6104	3.79503	1	1	15476	Unique	Used	1.36567	2	682.858	1364.71	0.238331	47.6256	4213	4213	MS2	15/20	Plasma_iTRAQ_5.raw
																gi11321561	nFPSPVDAAFR	1	1	HCD	N-Term(iTRAQ4plex)	16.4955	3.78528	1	1	13245	Unique	Used	1.35934	2	682.858	1364.71	1.13281	63.7377	4267	4267	MS2	14/20	Plasma_iTRAQ_1_3.raw
																gi11321561	nFPSPVDAAFR	1	1	HCD	N-Term(iTRAQ4plex)	17.0594	3.77726	1	1	14285	Unique	Used	1.33325	2	682.858	1364.71	1.04336	80.6534	5444	5444	MS2	15/20	Plasma_iTRAQ_1_3.raw
																gi11321561	nFPSPVDAAFR	1	1	HCD	N-Term(iTRAQ4plex)	15.4571	3.76765	1	1	18935	Unique	Used	1.4429	2	682.858	1364.71	0.864466	91.5729	8110	8110	MS2	15/20	Plasma_iTRAQ_4.raw
																gi11321561	nFPSPVDAAFR	1	1	HCD	N-Term(iTRAQ4plex)	14.9297	3.75494	1	1	13993	Unique	Used	1.30281	2	682.859	1364.71	1.58005	75.7775	5099	5099	MS2	15/20	Plasma_iTRAQ_1_3.raw
																gi11321561	nFPSPVDAAFR	1	1	HCD	N-Term(iTRAQ4plex)	7.0037	3.74469	1	1	12132	Unique	Used	1.27861	2	682.858	1364.71	0.417226	46.5325	3057	3057	MS2	13/20	Plasma_iTRAQ_1_3.raw
																gi11321561	nFPSPVDAAFR	1	1	HCD	N-Term(iTRAQ4plex)	15.1694	3.74469	1	1	7798	Unique	Used	1.32054	2	682.858	1364.71	0.327779	25.8611	2519	2519	MS2	16/20	Plasma_iTRAQ_6_8.raw
																gi11321561	nFPSPVDAAFR	1	1	HCD	N-Term(iTRAQ4plex)	14.31	3.74098	1	1	17707	Unique	Used	1.3558	2	682.859	1364.71	1.3117	71.9103	6646	6646	MS2	16/20	Plasma_iTRAQ_4.raw
																gi11321561	nFPSPVDAAFR	1	1	HCD	N-Term(iTRAQ4plex)	14.8823	3.7382	1	1	17604	Unique	Used	1.27315	2	682.859	1364.71	1.84839	70.436	6525	6525	MS2	14/20	Plasma_iTRAQ_4.raw
																gi11321561	nFPSPVDAAFR	1	1	HCD	N-Term(iTRAQ4plex)	16.6317	3.73716	1	1	15931	Unique	Used	1.47721	2	682.859	1364.71	1.93784	50.5893	4666	4666	MS2	15/20	Plasma_iTRAQ_4.raw
																gi11321561	nFPSPVDAAFR	1	1	HCD	N-Term(iTRAQ4plex)	17.6008	3.72679	1	1	13152	Unique	Used	1.08232	2	682.859	1364.71	1.66949	19.737	1184	1184	MS2	15/20	Plasma_iTRAQ_6.raw
																gi11321561	nFPSPVDAAFR	1	1	HCD	N-Term(iTRAQ4plex)	16.4954	3.72505	1	1	18789	Unique	Used	1.30561	2	682.858	1364.71	0.953913	87.9853	7884	7884	MS2	15/20	Plasma_iTRAQ_4.raw
																gi11321561	nFPSPVDAAFR	1	1	HCD	N-Term(iTRAQ4plex)	13.2809	3.72135	1	1	10240	Unique	Used	1.37598	2	682.858	1364.71	1.04336	16.9143	988	988	MS2	15/20	Plasma_iTRAQ_1_3.raw
																gi11321561	nFPSPVDAAFR	1	1	HCD	N-Term(iTRAQ4plex)	17.109	3.72087	1	1	14369	Unique	Used	1.34008	2	682.858	1364.71	1.13281	81.9537	5534	5534	MS2	15/20	Plasma_iTRAQ_1_3.raw
																gi11321561	nFPSPVDAAFR	1	1	HCD	N-Term(iTRAQ4plex)	12.6349	3.72057	1	1	15025	Unique	Used	1.38402	2	682.858	1364.71	0.596122	93.1266	6328	6328	MS2	16/20	Plasma_iTRAQ_1_3.raw
																gi11321561	nFPSPVDAAFR	1	1	HCD	N-Term(iTRAQ4plex)	14.286	3.7194	1	1	12580	Unique	Used	1.26186	2	682.859	1364.71	2.29563	17.4367	1004	1004	MS2	15/20	Plasma_iTRAQ_4.raw
																gi11321561	nFPSPVDAAFR	1	1	HCD	N-Term(iTRAQ4plex)	11.5312	3.71935	1	1	10732	Unique	Used	1.33611	2	682.858	1364.71	0.953913	24.5552	1524	1524	MS2	15/20	Plasma_iTRAQ_1_3.raw
																gi11321561	nFPSPVDAAFR	1	1	HCD	N-Term(iTRAQ4plex)	15.0283	3.7162	1	1	10324	Unique	Used	1.36224	2	682.859	1364.71	1.3117	18.1762	1079	1079	MS2	16/20	Plasma_iTRAQ_1_3.raw
																gi11321561	nFPSPVDAAFR	1	1	HCD	N-Term(iTRAQ4plex)	15.5956	3.71384	1	1	10986	Unique	Used	1.36791	2	682.858	1364.71	0.953913	28.58	1801	1801	MS2	14/20	Plasma_iTRAQ_1_3.raw
																gi11321561	nFPSPVDAAFR	1	1	HCD	N-Term(iTRAQ4plex)	15.6238	3.71298	1	1	12461	Unique	Used	1.28567	2	682.858	1364.71	0.238331	51.6683	3416	3416	MS2	14/20	Plasma_iTRAQ_1_3.raw
																gi11321561	nFPSPVDAAFR	1	1	HCD	N-Term(iTRAQ4plex)	16.6165	3.70854	1	1	18462	Unique	Used	1.293	2	682.859	1364.71	1.4906	83.5472	7534	7534	MS2	15/20	Plasma_iTRAQ_4.raw
																gi11321561	nFPSPVDAAFR	1	1	HCD	N-Term(iTRAQ4plex)	14.7264	3.69867	1	1	11674	Unique	Used	1.35639	2	682.858	1364.71	1.04336	39.2749	2552	2552	MS2	14/20	Plasma_iTRAQ_1_3.raw
																gi11321561	nFPSPVDAAFR	1	1	HCD	N-Term(iTRAQ4plex)	17.4182	3.6985	1	1	10483	Unique	Used	1.36764	2	682.859	1364.71	1.3117	20.6448	1253	1253	MS2	16/20	Plasma_iTRAQ_1_3.raw
																gi11321561	nFPSPVDAAFR	1	1	HCD	N-Term(iTRAQ4plex)	13.6467	3.68803	1	1	14744	Unique	Used	1.38534	2	682.858	1364.71	-0.0300131	87.0907	5934	5934	MS2	14/20	Plasma_iTRAQ_1_3.raw
																gi11321561	nFPSPVDAAFR	1	1	HCD	N-Term(iTRAQ4plex)	14.4166	3.687	1	1	14565	Unique	Used	1.44609	2	682.858	1364.71	1.13281	84.6351	5743	5743	MS2	14/20	Plasma_iTRAQ_1_3.raw
																gi11321561	nFPSPVDAAFR	1	1	HCD	N-Term(iTRAQ4plex)	16.0614	3.68197	1	1	10655	Unique	Used	1.38914	2	682.858	1364.71	1.04336	23.3644	1441	1441	MS2	15/20	Plasma_iTRAQ_1_3.raw
																gi11321561	nFPSPVDAAFR	1	1	HCD	N-Term(iTRAQ4plex)	10.8603	3.67957	1	1	12624	Unique	Used	1.4108	2	682.859	1364.71	1.66949	54.1802	3594	3594	MS2	16/20	Plasma_iTRAQ_1_3.raw
																gi11321561	nFPSPVDAAFR	1	1	HCD	N-Term(iTRAQ4plex)	16.3994	3.6782	1	1	14656	Unique	Used	1.34151	2	682.859	1364.71	1.84839	85.8391	5840	5840	MS2	14/20	Plasma_iTRAQ_1_3.raw
																gi11321561	nFPSPVDAAFR	1	1	HCD	N-Term(iTRAQ4plex)	16.0631	3.65496	1	1	12545	Unique	Used	1.19579	2	682.858	1364.71	0.596122	52.9524	3507	3507	MS2	14/20	Plasma_iTRAQ_1_3.raw
																gi11321561	nFPSPVDAAFR	1	1	HCD	N-Term(iTRAQ4plex)	4.38824	3.65272	1	1	7807	Unique	Used	1.29071	2	682.858	1364.71	0.327779	25.9519	2528	2528	MS2	17/20	Plasma_iTRAQ_6_8.raw
																gi11321561	nFPSPVDAAFR	1	1	HCD	N-Term(iTRAQ4plex)	15.2741	3.64388	1	1	10408	Unique	Used	1.37852	2	682.859	1364.71	1.4906	19.451	1170	1170	MS2	16/20	Plasma_iTRAQ_1_3.raw
																gi11321561	nFPSPVDAAFR	1	1	HCD	N-Term(iTRAQ4plex)	8.09398	3.63633	1	1	11297	Unique	Used	1.31696	2	682.859	1364.71	1.3117	33.4166	2141	2141	MS2	14/20	Plasma_iTRAQ_1_3.raw
																gi11321561	nFPSPVDAAFR	1	1	HCD	N-Term(iTRAQ4plex)	14.4573	3.63617	1	1	15002	Unique	Used	1.34449	2	682.858	1364.71	0.506674	91.9415	6260	6260	MS2	15/20	Plasma_iTRAQ_1_3.raw
																gi11321561	nFPSPVDAAFR	1	1	HCD	N-Term(iTRAQ4plex)	16.8096	3.63599	1	1	13598	Unique	Used	1.40432	2	682.859	1364.71	1.3117	69.371	4655	4655	MS2	15/20	Plasma_iTRAQ_1_3.raw
																gi11321561	nFPSPVDAAFR	1	1	HCD	N-Term(iTRAQ4plex)	4.23284	3.63023	1	1	12286	Unique	Used	1.36124	2	682.858	1364.71	1.13281	48.9879	3226	3226	MS2	14/20	Plasma_iTRAQ_1_3.raw
																gi11321561	nFPSPVDAAFR	1	1	HCD	N-Term(iTRAQ4plex)	7.59468	3.62207	1	1	7829	Unique	Used	1.43335	2	682.859	1364.71	1.4906	26.182	2552	2552	MS2	16/20	Plasma_iTRAQ_6_8.raw
																gi11321561	nFPSPVDAAFR	1	1	HCD	N-Term(iTRAQ4plex)	4.43999	3.61305	1	1	7832	Unique	Used	1.46906	2	682.859	1364.71	1.4906	26.2113	2555	2555	MS2	15/20	Plasma_iTRAQ_6_8.raw
																gi11321561	nFPSPVDAAFR	1	1	HCD	N-Term(iTRAQ4plex)	13.663	3.60779	1	1	14826	Unique	Used	1.35274	2	682.858	1364.71	1.04336	88.2815	6022	6022	MS2	14/20	Plasma_iTRAQ_1_3.raw
																gi11321561	nFPSPVDAAFR	1	1	HCD	N-Term(iTRAQ4plex)	14.7235	3.59366	1	1	10576	Unique	Used	1.29845	2	682.858	1364.71	1.04336	22.1297	1355	1355	MS2	15/20	Plasma_iTRAQ_1_3.raw
																gi11321561	nFPSPVDAAFR	1	1	HCD	N-Term(iTRAQ4plex)	10.038	3.57763	1	1	12669	Unique	Used	1.41764	2	682.858	1364.71	0.953913	18.0434	1030	1030	MS2	14/20	Plasma_iTRAQ_5.raw
																gi11321561	nFPSPVDAAFR	1	1	HCD	N-Term(iTRAQ4plex)	6.39201	3.57087	1	1	15351	Unique	Used	1.20344	2	682.858	1364.71	1.22226	42.2691	3703	3703	MS2	14/20	Plasma_iTRAQ_6.raw
																gi11321561	nFPSPVDAAFR	1	1	HCD	N-Term(iTRAQ4plex)	12.5218	3.56779	1	1	15358	Unique	Used	1.4113	2	682.858	1364.71	0.953913	44.6531	4036	4036	MS2	15/20	Plasma_iTRAQ_4.raw
																gi11321561	nFPSPVDAAFR	1	1	HCD	N-Term(iTRAQ4plex)	16.6506	3.55128	1	1	18708	Unique	Used	1.42296	2	682.859	1364.71	1.40115	86.7444	7797	7797	MS2	15/20	Plasma_iTRAQ_4.raw
																gi11321561	nFPSPVDAAFR	1	1	HCD	N-Term(iTRAQ4plex)	16.7276	3.54114	1	1	11500	Unique	Used	1.31742	2	682.859	1364.71	1.4906	36.5771	2363	2363	MS2	14/20	Plasma_iTRAQ_1_3.raw
																gi11321561	nFPSPVDAAFR	1	1	HCD	N-Term(iTRAQ4plex)	5.39233	3.51383	1	1	11777	Unique	Used	1.25085	2	682.858	1364.71	1.13281	40.8963	2664	2664	MS2	14/20	Plasma_iTRAQ_1_3.raw
																gi11321561	nFPSPVDAAFR	1	1	HCD	N-Term(iTRAQ4plex)	18.0553	3.50664	1	1	8690	Unique	Used	0.382933	2	682.861	1364.71	4.44236	48.4415	3453	3453	MS2	15/20	Plasma_iTRAQ_8.raw
																gi11321561	nFPSPVDAAFR	1	1	HCD	N-Term(iTRAQ4plex)	7.91927	3.50648	1	1	11898	Unique	Used	1.24577	2	682.859	1364.71	1.66949	42.8197	2798	2798	MS2	14/20	Plasma_iTRAQ_1_3.raw
																gi11321561	nFPSPVDAAFR	1	1	HCD	N-Term(iTRAQ4plex)	5.18412	3.49308	1	1	11216	Unique	Used	1.36799	2	682.858	1364.71	1.13281	32.1448	2052	2052	MS2	13/20	Plasma_iTRAQ_1_3.raw
																gi11321561	nFPSPVDAAFR	1	1	HCD	N-Term(iTRAQ4plex)	13.5763	3.48827	1	1	12794	Unique	Used	1.34225	2	682.859	1364.71	1.58005	56.794	3779	3779	MS2	15/20	Plasma_iTRAQ_1_3.raw
																gi11321561	nFPSPVDAAFR	1	1	HCD	N-Term(iTRAQ4plex)	7.67509	3.48396	1	1	11982	Unique	Used	1.37373	2	682.859	1364.71	1.3117	44.1204	2889	2889	MS2	14/20	Plasma_iTRAQ_1_3.raw
																gi11321561	nFPSPVDAAFR	1	1	HCD	N-Term(iTRAQ4plex)	19.2249	3.46807	1	1	13256	Unique	Used	1.06416	2	682.858	1364.71	0.417226	21.269	1301	1301	MS2	14/20	Plasma_iTRAQ_6.raw
																gi11321561	nFPSPVDAAFR	1	1	HCD	N-Term(iTRAQ4plex)	14.5768	3.46804	1	1	18947	Unique	Used	1.3781	2	682.858	1364.71	0.68557	92.7811	8176	8176	MS2	16/20	Plasma_iTRAQ_4.raw
																gi11321561	nFPSPVDAAFR	1	1	HCD	N-Term(iTRAQ4plex)	13.7127	3.45243	1	1	15046	Unique	Used	1.43575	2	682.858	1364.71	0.596122	94.3175	6396	6396	MS2	15/20	Plasma_iTRAQ_1_3.raw
																gi11321561	nFPSPVDAAFR	1	1	HCD	N-Term(iTRAQ4plex)	3.66113	3.45002	1	1	11383	Unique	Used	1.36564	2	682.858	1364.71	0.775018	34.7422	2234	2234	MS2	14/20	Plasma_iTRAQ_1_3.raw
																gi11321561	nFPSPVDAAFR	1	1	HCD	N-Term(iTRAQ4plex)	11.6513	3.44179	1	1	18959	Unique	Used	1.27976	2	682.858	1364.71	0.596122	93.9725	8241	8241	MS2	15/20	Plasma_iTRAQ_4.raw
																gi11321561	nFPSPVDAAFR	1	1	HCD	N-Term(iTRAQ4plex)	14.8946	3.42262	1	1	18283	Unique	Used	1.29312	2	682.858	1364.71	0.327779	81.1	7343	7343	MS2	14/20	Plasma_iTRAQ_4.raw
																gi11321561	nFPSPVDAAFR	1	1	HCD	N-Term(iTRAQ4plex)	14.3369	3.38735	1	1	11561	Unique	Used	1.18219	2	682.859	1364.71	1.58005	55.6604	3635	3635	MS2	15/20	Plasma_iTRAQ_4_6.raw
																gi11321561	nFPSPVDAAFR	1	1	HCD	N-Term(iTRAQ4plex)	10.3421	3.35708	1	1	9990	Unique	Used	1.36143	2	682.858	1364.71	0.417226	7.19705	413	413	MS2	14/20	Plasma_iTRAQ_1_3.raw
																gi11321561	nFPSPVDAAFR	1	1	HCD	N-Term(iTRAQ4plex)	10.189	3.34742	1	1	12660	Unique	Used	1.18597	2	682.859	1364.71	2.47452	18.6812	1104	1104	MS2	11/20	Plasma_iTRAQ_4.raw
																gi11321561	nFPSPVDAAFR	1	1	HCD	N-Term(iTRAQ4plex)	13.8256	3.27391	1	1	15080	Unique	Used	1.33039	2	682.858	1364.71	1.04336	96.736	6531	6531	MS2	15/20	Plasma_iTRAQ_1_3.raw
																gi11321561	nFPSPVDAAFR	1	1	HCD	N-Term(iTRAQ4plex)	6.93149	3.25831	1	1	13077	Unique	Used	1.0492	2	682.858	1364.71	0.148883	18.4696	1096	1096	MS2	13/20	Plasma_iTRAQ_6.raw
																gi11321561	nFPSPVDAAFR	1	1	HCD	N-Term(iTRAQ4plex)	13.679	3.25369	1	1	10079	Unique	Used	1.3756	2	682.858	1364.71	0.775018	11.9861	686	686	MS2	14/20	Plasma_iTRAQ_1_3.raw
																gi11321561	nFPSPVDAAFR	1	1	HCD	N-Term(iTRAQ4plex)	14.0809	3.23395	1	1	10105	Unique	Used	1.29285	2	682.858	1364.71	0.506674	13.1677	755	755	MS2	16/20	Plasma_iTRAQ_1_3.raw
																gi11321561	nFPSPVDAAFR	1	1	HCD	N-Term(iTRAQ4plex)	1	3.18607	1	1	13442	Unique	Used	1.46287	2	682.858	1364.71	0.68557	66.8261	4482	4482	MS2	13/20	Plasma_iTRAQ_1_3.raw
																gi11321561	nFPSPVDAAFR	1	1	HCD	N-Term(iTRAQ4plex)	21.5727	3.17811	1	1	12925	Unique	Used	1.02551	2	682.858	1364.71	0.775018	15.999	922	922	MS2	15/20	Plasma_iTRAQ_6.raw
																gi11321561	nFPSPVDAAFR	1	1	HCD	N-Term(iTRAQ4plex)	6.77525	3.17771	1	1	13000	Unique	Used	1.08032	2	682.859	1364.71	1.66949	17.2713	1010	1010	MS2	13/20	Plasma_iTRAQ_6.raw
																gi11321561	nFPSPVDAAFR	1	1	HCD	N-Term(iTRAQ4plex)	1	3.16897	1	1	9482	Unique	Used	1.07897	2	682.857	1364.71	-0.387805	19.946	1175	1175	MS2	12/20	Plasma_iTRAQ_4_6.raw
																gi11321561	nFPSPVDAAFR	1	1	HCD	N-Term(iTRAQ4plex)	14.2619	3.16025	1	1	15063	Unique	Used	1.27701	2	682.858	1364.71	1.04336	95.5174	6463	6463	MS2	14/20	Plasma_iTRAQ_1_3.raw
																gi11321561	nFPSPVDAAFR	1	1	HCD	N-Term(iTRAQ4plex)	7.5504	3.14163	1	1	9845	Unique	Used	1.31419	2	682.858	1364.71	0.775018	0.10653	8	8	MS2	15/20	Plasma_iTRAQ_1_3.raw
																gi11321561	nFPSPVDAAFR	1	1	HCD	N-Term(iTRAQ4plex)	7.97396	3.13259	1	1	9893	Unique	Used	1.40133	2	682.858	1364.71	0.775018	2.50606	144	144	MS2	14/20	Plasma_iTRAQ_1_3.raw
																gi11321561	nFPSPVDAAFR	1	1	HCD	N-Term(iTRAQ4plex)	7.56869	3.12884	1	1	15096	Unique	Used	1.29612	2	682.858	1364.71	0.148883	97.9423	6598	6598	MS2	14/20	Plasma_iTRAQ_1_3.raw
																gi11321561	nFPSPVDAAFR	1	1	HCD	N-Term(iTRAQ4plex)	14.5443	3.12102	1	1	10015	Unique	Used	1.27643	2	682.858	1364.71	0.327779	8.39968	482	482	MS2	14/20	Plasma_iTRAQ_1_3.raw
																gi11321561	nFPSPVDAAFR	1	1	HCD	N-Term(iTRAQ4plex)	14.3112	3.1198	1	1	9917	Unique	Used	1.43117	2	682.858	1364.71	-0.119461	3.67747	211	211	MS2	14/20	Plasma_iTRAQ_1_3.raw
																gi11321561	nFPSPVDAAFR	1	1	HCD	N-Term(iTRAQ4plex)	15.7399	3.11568	1	1	9869	Unique	Used	1.35573	2	682.858	1364.71	0.68557	1.28733	75	75	MS2	14/20	Plasma_iTRAQ_1_3.raw
																gi11321561	nFPSPVDAAFR	1	1	HCD	N-Term(iTRAQ4plex)	9.07025	3.10797	1	1	10910	Unique	Used	1.15188	2	682.858	1364.71	0.68557	27.3882	1718	1718	MS2	14/20	Plasma_iTRAQ_1_3.raw
																gi11321561	nFPSPVDAAFR	1	1	HCD	N-Term(iTRAQ4plex)	13.1859	3.09081	1	1	18980	Unique	Used	1.25062	2	682.858	1364.71	0.327779	96.3746	8371	8371	MS2	14/20	Plasma_iTRAQ_4.raw
																gi11321561	nFPSPVDAAFR	1	1	HCD	N-Term(iTRAQ4plex)	1	3.07749	1	1	9373	Unique	Used	1.07749	2	682.859	1364.71	1.93784	18.0389	1043	1043	MS2	13/20	Plasma_iTRAQ_4_6.raw
																gi11321561	nFPSPVDAAFR	1	1	HCD	N-Term(iTRAQ4plex)	5.91976	3.07737	1	1	10128	Unique	Used	1.31666	2	682.858	1364.71	1.04336	14.3652	824	824	MS2	13/20	Plasma_iTRAQ_1_3.raw
																gi11321561	nFPSPVDAAFR	1	1	HCD	N-Term(iTRAQ4plex)	5.78801	3.05901	1	1	9966	Unique	Used	1.37866	2	682.858	1364.71	0.238331	6.01391	345	345	MS2	14/20	Plasma_iTRAQ_1_3.raw
																gi11321561	nFPSPVDAAFR	1	1	HCD	N-Term(iTRAQ4plex)	6.50801	3.04054	1	1	12056	Unique	Used	1.50086	2	682.858	1364.71	1.04336	45.327	2973	2973	MS2	14/20	Plasma_iTRAQ_1_3.raw
																gi11321561	nFPSPVDAAFR	1	1	HCD	N-Term(iTRAQ4plex)	13.9071	3.03077	1	1	15114	Unique	Used	1.31562	2	682.858	1364.71	0.0594349	99.1715	6667	6667	MS2	13/20	Plasma_iTRAQ_1_3.raw
																gi11321561	nFPSPVDAAFR	1	1	HCD	N-Term(iTRAQ4plex)	4.49001	3.01353	1	1	9939	Unique	Used	1.29215	2	682.858	1364.71	0.596122	4.81966	276	276	MS2	13/20	Plasma_iTRAQ_1_3.raw
																gi11321561	nFPSPVDAAFR	1	1	HCD	N-Term(iTRAQ4plex)	1	2.94521	1	1	9556	Unique	Used	1.02064	2	682.858	1364.71	0.596122	21.2572	1265	1265	MS2	11/20	Plasma_iTRAQ_4_6.raw
																gi11321561	nFPSPVDAAFRQGHnSVFLIk	1	1	HCD	N-Term(iTRAQ4plex), N15(Deamidated), K21(iTRAQ4plex)	57.1034	5.69673	1	1	13737	Unique	Used	0.305183	4	659.106	2633.4	-2.6208	55.5838	4877	4877	MS2	29/120	Plasma_iTRAQ_7.raw
																gi11321561	qGHnSVFLIk	1	1	HCD	N-Term(iTRAQ4plex), N4(Deamidated), K10(iTRAQ4plex)	18.8566	5.42068	1	1	12617	Unique	Used	1.55307	3	477.946	1431.82	2.02835	72.4461	4841	4841	MS2	16/36	Plasma_iTRAQ_4_6.raw
																gi11321561	qGHnSVFLIk	1	1	HCD	N-Term(iTRAQ4plex), Q1(Deamidated), N4(Deamidated), K10(iTRAQ4plex)	21.5901	5.4158	1	1	10988	Unique	Used	1.49612	3	478.272	1432.8	-0.853462	46.0808	2971	2971	MS2	18/36	Plasma_iTRAQ_4_6.raw
																gi11321561	qGHnSVFLIk	1	1	HCD	N-Term(iTRAQ4plex), N4(Deamidated), K10(iTRAQ4plex)	28.4866	5.33953	1	1	10861	Unique	Used	1.69201	3	477.945	1431.82	0.365877	43.8869	2821	2821	MS2	17/36	Plasma_iTRAQ_4_6.raw
																gi11321561	qGHNSVFLIk	1	1	HCD	N-Term(iTRAQ4plex), K10(iTRAQ4plex)	28.6708	5.20401	1	1	12641	Unique	Used	1.6073	3	477.618	1430.84	1.71486	72.7717	4867	4867	MS2	17/36	Plasma_iTRAQ_4_6.raw
																gi11321561	qGHnSVFLIk	1	1	HCD	N-Term(iTRAQ4plex), N4(Deamidated), K10(iTRAQ4plex)	20.3479	5.16459	1	1	13896	Unique	Used	1.52219	3	477.945	1431.82	0.110111	29.9164	2448	2448	MS2	21/36	Plasma_iTRAQ_4.raw
																gi11321561	qGHnSVFLIk	1	1	HCD	N-Term(iTRAQ4plex), N4(Deamidated), K10(iTRAQ4plex)	20.8315	5.09154	1	1	13790	Unique	Used	1.44117	3	477.945	1431.82	0.685584	27.2748	1934	1934	MS2	17/36	Plasma_iTRAQ_6.raw
																gi11321561	qGHnSVFLIk	1	1	HCD	N-Term(iTRAQ4plex), N4(Deamidated), K10(iTRAQ4plex)	14.4463	5.02309	1	1	10787	Unique	Used	1.66888	3	477.945	1431.82	0.237994	42.5523	2728	2728	MS2	19/36	Plasma_iTRAQ_4_6.raw
																gi11321561	qGHnSVFLIk	1	1	HCD	N-Term(iTRAQ4plex), Q1(Deamidated), N4(Deamidated), K10(iTRAQ4plex)	17.1404	5.00397	1	1	10913	Unique	Used	1.63252	3	478.272	1432.8	-0.725667	44.7758	2882	2882	MS2	17/36	Plasma_iTRAQ_4_6.raw
																gi11321561	qGHNSVFLIk	1	1	HCD	N-Term(iTRAQ4plex), K10(iTRAQ4plex)	25.1548	4.82543	1	1	13338	Unique	Used	1.58806	3	477.616	1430.83	-0.972528	24.5637	1838	1838	MS2	16/36	Plasma_iTRAQ_4.raw
																gi11321561	qGHNSVFLIk	1	1	HCD	N-Term(iTRAQ4plex), K10(iTRAQ4plex)	46.6453	4.79104	1	1	10671	Unique	Used	1.68808	2	715.923	1430.84	2.23614	40.5105	2588	2588	MS2	18/18	Plasma_iTRAQ_4_6.raw
																gi11321561	qGHNSVFLIk	1	1	HCD	N-Term(iTRAQ4plex), Q1(Deamidated), K10(iTRAQ4plex)	10.9016	4.76249	1	1	10883	Unique	Used	1.54808	2	716.414	1431.82	0.524465	44.2639	2847	2847	MS2	16/18	Plasma_iTRAQ_4_6.raw
																gi11321561	qGHnSVFLIk	1	1	HCD	N-Term(iTRAQ4plex), N4(Deamidated), K10(iTRAQ4plex)	28.6687	4.68708	1	1	10805	Unique	Used	1.68324	2	716.415	1431.82	1.37702	42.874	2751	2751	MS2	18/18	Plasma_iTRAQ_4_6.raw
																gi11321561	qGHnSVFLIk	1	1	HCD	N-Term(iTRAQ4plex), Q1(Deamidated), N4(Deamidated), K10(iTRAQ4plex)	19.9264	4.64692	1	1	10927	Unique	Used	1.65568	2	716.906	1432.8	0.689465	44.9958	2898	2898	MS2	17/18	Plasma_iTRAQ_4_6.raw
																gi11321561	qGHNSVFLIk	1	1	HCD	N-Term(iTRAQ4plex), K10(iTRAQ4plex)	19.2444	4.60697	1	1	13597	Unique	Used	1.49075	3	477.618	1430.84	2.54667	25.2618	1709	1709	MS2	16/36	Plasma_iTRAQ_6.raw
																gi11321561	qGHNSVFLIk	1	1	HCD	N-Term(iTRAQ4plex), K10(iTRAQ4plex)	28.105	4.60505	1	1	10594	Unique	Used	1.72126	3	477.617	1430.84	1.20298	39.2216	2498	2498	MS2	16/36	Plasma_iTRAQ_4_6.raw
																gi11321561	qGHnSVFLIk	1	1	HCD	N-Term(iTRAQ4plex), N4(Deamidated), K10(iTRAQ4plex)	21.7071	4.59296	1	1	10739	Unique	Used	1.47459	2	716.413	1431.82	-0.157578	41.6821	2669	2669	MS2	16/18	Plasma_iTRAQ_4_6.raw
																gi11321561	qGHnSVFLIk	1	1	HCD	N-Term(iTRAQ4plex), N4(Deamidated), K10(iTRAQ4plex)	15.057	4.51406	1	1	10722	Unique	Used	1.36889	3	477.945	1431.82	0.557701	41.3728	2648	2648	MS2	16/36	Plasma_iTRAQ_4_6.raw
																gi11321561	qGHNSVFLIk	1	1	HCD	N-Term(iTRAQ4plex), K10(iTRAQ4plex)	27.9961	4.4729	1	1	10670	Unique	Used	1.91427	3	477.617	1430.84	1.13899	40.5069	2587	2587	MS2	17/36	Plasma_iTRAQ_4_6.raw
																gi11321561	qGHnSVFLIk	1	1	HCD	N-Term(iTRAQ4plex), Q1(Deamidated), N4(Deamidated), K10(iTRAQ4plex)	22.5028	4.43886	1	1	14114	Unique	Used	0.967919	3	478.273	1432.81	1.44685	30.1609	2295	2295	MS2	18/36	Plasma_iTRAQ_6.raw
																gi11321561	qGHNSVFLIk	1	1	HCD	N-Term(iTRAQ4plex), K10(iTRAQ4plex)	36.3702	4.35227	1	1	10598	Unique	Used	1.56915	2	715.922	1430.84	-0.0673326	39.2778	2502	2502	MS2	18/18	Plasma_iTRAQ_4_6.raw
																gi11321561	qGHNSVFLIk	1	1	HCD	N-Term(iTRAQ4plex), K10(iTRAQ4plex)	13.899	4.34286	1	1	12737	Unique	Used	1.72771	3	477.617	1430.84	1.33095	74.2114	4977	4977	MS2	15/36	Plasma_iTRAQ_4_6.raw
																gi11321561	qGHnSVFLIk	1	1	HCD	N-Term(iTRAQ4plex), N4(Deamidated), K10(iTRAQ4plex)	19.8145	4.15501	1	1	12630	Unique	Used	1.69377	3	477.944	1431.82	-0.849013	72.6223	4855	4855	MS2	15/36	Plasma_iTRAQ_4_6.raw
																gi11321561	qGHnSVFLIk	1	1	HCD	N-Term(iTRAQ4plex), N4(Deamidated), K10(iTRAQ4plex)	6.05031	3.9602	1	1	13878	Unique	Used	1.57068	2	716.42	1431.83	9.39093	29.7337	2428	2428	MS2	16/18	Plasma_iTRAQ_4.raw
																gi11321561	rLWWLDLk	1	1	HCD	N-Term(iTRAQ4plex), K8(iTRAQ4plex)	4.80674	3.93325	1	1	13712	Unique	Used	1.73327	3	473.289	1417.85	-2.91891	55.211	4842	4842	MS2	16/28	Plasma_iTRAQ_7.raw
																gi11321561	rLWWLDLk	1	1	HCD	N-Term(iTRAQ4plex), K8(iTRAQ4plex)	8.4014	3.89948	1	1	15835	Unique	Used	1.6812	3	473.29	1417.85	-1.30462	89.5953	7698	7698	MS2	13/28	Plasma_iTRAQ_7.raw
																gi11321561	rLWWLDLk	1	1	HCD	N-Term(iTRAQ4plex), K8(iTRAQ4plex)	8.93306	3.87708	1	1	13637	Unique	Used	1.68144	3	473.291	1417.86	1.14909	53.9969	4735	4735	MS2	16/28	Plasma_iTRAQ_7.raw
																gi11321561	rLWWLDLk	1	1	HCD	N-Term(iTRAQ4plex), K8(iTRAQ4plex)	11.2759	3.87041	1	1	9213	Unique	Used	1.56396	3	473.292	1417.86	2.95708	61.0253	4357	4357	MS2	17/28	Plasma_iTRAQ_8.raw
																gi11321561	rLWWLDLk	1	1	HCD	N-Term(iTRAQ4plex), K8(iTRAQ4plex)	1.7291	3.72511	1	1	15800	Unique	Used	1.6324	3	473.29	1417.86	0.245093	88.4181	7632	7632	MS2	15/28	Plasma_iTRAQ_7.raw
																gi11321561	rLWWLDLk	1	1	HCD	N-Term(iTRAQ4plex), K8(iTRAQ4plex)	3.28081	3.37022	1	1	13598	Unique	Used	1.47859	2	709.434	1417.86	2.94504	53.4943	4685	4685	MS2	14/14	Plasma_iTRAQ_7.raw
																gi11321561	rLWWLDLk	1	1	HCD	N-Term(iTRAQ4plex), K8(iTRAQ4plex)	1	2.44411	1	1	13619	Unique	Used	2.00506	1	1417.86	1417.86	-0.0157485	53.7849	4713	4713	MS2	11/14	Plasma_iTRAQ_7.raw
																gi11321561	sGAQATWTELPWPHEk	1	1	HCD	N-Term(iTRAQ4plex), K16(iTRAQ4plex)	64.6885	6.92337	1	1	16277	Unique	Used	1.50417	3	709.37	2126.09	1.49244	54.1063	5040	5040	MS2	26/60	Plasma_iTRAQ_4.raw
																gi11321561	sGAQATWTELPWPHEk	1	1	HCD	N-Term(iTRAQ4plex), K16(iTRAQ4plex)	65.0253	6.91381	1	1	9802	Unique	Used	1.58497	3	709.369	2126.09	0.458963	25.9278	1580	1580	MS2	26/60	Plasma_iTRAQ_4_6.raw
																gi11321561	sGAQATWTELPWPHEk	1	1	HCD	N-Term(iTRAQ4plex), K16(iTRAQ4plex)	35.312	6.40372	1	1	11757	Unique	Used	1.58455	3	709.37	2126.09	1.40631	58.8176	3858	3858	MS2	24/60	Plasma_iTRAQ_4_6.raw
																gi11321561	sGAQATWTELPWPHEk	1	1	HCD	N-Term(iTRAQ4plex), K16(iTRAQ4plex)	30.5763	6.36756	1	1	15670	Unique	Used	1.22971	3	709.369	2126.09	0.37284	45.9752	4085	4085	MS2	25/60	Plasma_iTRAQ_6.raw
																gi11321561	sGAQATWTELPWPHEk	1	1	HCD	N-Term(iTRAQ4plex), K16(iTRAQ4plex)	85.1606	6.32136	1	1	12821	Unique	Used	1.48837	3	709.37	2126.1	2.00917	75.4404	5074	5074	MS2	26/60	Plasma_iTRAQ_4_6.raw
																gi11321561	sGAQATWTELPWPHEk	1	1	HCD	N-Term(iTRAQ4plex), K16(iTRAQ4plex)	74.6597	6.18252	1	1	10070	Unique	Used	1.37407	3	709.369	2126.09	0.803455	30.5312	1896	1896	MS2	27/60	Plasma_iTRAQ_4_6.raw
																gi11321561	sGAQATWTELPWPHEk	1	1	HCD	N-Term(iTRAQ4plex), K16(iTRAQ4plex)	8.54094	6.11453	1	1	9655	Unique	Used	1.67872	3	709.368	2126.09	-0.230021	23.1708	1394	1394	MS2	22/60	Plasma_iTRAQ_4_6.raw
																gi11321561	sGAQATWTELPWPHEk	1	1	HCD	N-Term(iTRAQ4plex), K16(iTRAQ4plex)	107.772	5.97573	1	1	15709	Unique	Used	1.73077	2	1063.55	2126.09	0.982025	46.37	4130	4130	MS2	21/30	Plasma_iTRAQ_6.raw
																gi11321561	sGAQATWTELPWPHEk	1	1	HCD	N-Term(iTRAQ4plex), K16(iTRAQ4plex)	92.1947	5.94956	1	1	9873	Unique	Used	1.29143	3	709.369	2126.09	1.32019	27.1877	1666	1666	MS2	25/60	Plasma_iTRAQ_4_6.raw
																gi11321561	sGAqATWTELPWPHEk	1	1	HCD	N-Term(iTRAQ4plex), Q4(Deamidated), K16(iTRAQ4plex)	9.13974	5.91152	1	1	11880	Unique	Used	1.54645	3	709.695	2127.07	-1.43847	60.7966	3998	3998	MS2	23/60	Plasma_iTRAQ_4_6.raw
																gi11321561	sGAqATWTELPWPHEk	1	1	HCD	N-Term(iTRAQ4plex), Q4(Deamidated), K16(iTRAQ4plex)	92.4177	5.90516	1	1	15941	Unique	Used	1.54886	2	1064.05	2127.08	3.905	48.7879	4398	4398	MS2	20/30	Plasma_iTRAQ_6.raw
																gi11321561	sGAQATWTELPWPHEk	1	1	HCD	N-Term(iTRAQ4plex), K16(iTRAQ4plex)	42.1984	5.90014	1	1	15784	Unique	Used	1.85349	3	709.37	2126.1	2.0953	47.1587	4216	4216	MS2	25/60	Plasma_iTRAQ_6.raw
																gi11321561	sGAqATWTELPWPHEk	1	1	HCD	N-Term(iTRAQ4plex), Q4(Deamidated), K16(iTRAQ4plex)	6.58708	5.88488	1	1	15918	Unique	Used	1.01149	3	709.701	2127.09	6.2229	48.5076	4370	4370	MS2	22/60	Plasma_iTRAQ_6.raw
																gi11321561	sGAQATWTELPWPHEk	1	1	HCD	N-Term(iTRAQ4plex), K16(iTRAQ4plex)	106.598	5.86631	1	1	16357	Unique	Used	1.61495	2	1063.55	2126.09	0.522703	54.997	5128	5128	MS2	20/30	Plasma_iTRAQ_4.raw
																gi11321561	sGAQATWTELPWPHEk	1	1	HCD	N-Term(iTRAQ4plex), K16(iTRAQ4plex)	3.14055	5.76938	1	1	9573	Unique	Used	1.67392	3	709.368	2126.09	-0.402268	21.561	1285	1285	MS2	20/60	Plasma_iTRAQ_4_6.raw
																gi11321561	sGAQATWTELPWPHEk	1	1	HCD	N-Term(iTRAQ4plex), K16(iTRAQ4plex)	87.0828	5.75872	1	1	9979	Unique	Used	1.59045	3	709.369	2126.09	0.200594	29.0477	1792	1792	MS2	25/60	Plasma_iTRAQ_4_6.raw
																gi11321561	sGAQATWTELPWPHEk	1	1	HCD	N-Term(iTRAQ4plex), K16(iTRAQ4plex)	29.2798	5.73967	1	1	10176	Unique	Used	1.37487	3	709.369	2126.09	0.37284	32.2643	2017	2017	MS2	26/60	Plasma_iTRAQ_4_6.raw
																gi11321561	sGAQATWTELPWPHEk	1	1	HCD	N-Term(iTRAQ4plex), K16(iTRAQ4plex)	16.9323	5.64527	1	1	16392	Unique	Used	1.51639	3	709.37	2126.1	2.0953	55.4001	5167	5167	MS2	25/60	Plasma_iTRAQ_4.raw
																gi11321561	sGAQATWTELPWPHEk	1	1	HCD	N-Term(iTRAQ4plex), K16(iTRAQ4plex)	11.1378	5.64206	1	1	9729	Unique	Used	1.51174	3	709.37	2126.1	1.92305	24.5733	1489	1489	MS2	21/60	Plasma_iTRAQ_4_6.raw
																gi11321561	sGAQATWTELPWPHEk	1	1	HCD	N-Term(iTRAQ4plex), K16(iTRAQ4plex)	28.4771	5.60536	1	1	13778	Unique	Used	1.47207	3	709.372	2126.1	4.59285	90.5131	6202	6202	MS2	24/60	Plasma_iTRAQ_4_6.raw
																gi11321561	sGAqATWTELPWPHEk	1	1	HCD	N-Term(iTRAQ4plex), Q4(Deamidated), K16(iTRAQ4plex)	1.62119	5.54514	1	1	9553	Unique	Used	1.65569	3	709.704	2127.1	10.2687	21.2131	1262	1262	MS2	14/60	Plasma_iTRAQ_4_6.raw
																gi11321561	sGAQATWTELPWPHEk	1	1	HCD	N-Term(iTRAQ4plex), K16(iTRAQ4plex)	27.3631	5.5262	1	1	19092	Unique	Used	1.3606	3	709.369	2126.09	0.0283479	89.1893	8234	8234	MS2	23/60	Plasma_iTRAQ_6.raw
																gi11321561	sGAQATWTELPWPHEk	1	1	HCD	N-Term(iTRAQ4plex), K16(iTRAQ4plex)	85.2904	5.3948	1	1	13709	Unique	Used	1.39258	3	709.37	2126.09	1.66468	89.1151	6109	6109	MS2	26/60	Plasma_iTRAQ_4_6.raw
																gi11321561	sGAQATWTELPWPHEk	1	1	HCD	N-Term(iTRAQ4plex), K16(iTRAQ4plex)	52.315	5.36329	1	1	16394	Unique	Used	1.4588	4	532.278	2126.09	-0.236346	55.4092	5169	5169	MS2	23/90	Plasma_iTRAQ_4.raw
																gi11321561	sGAQATWTELPWPHEk	1	1	HCD	N-Term(iTRAQ4plex), K16(iTRAQ4plex)	6.96459	5.34601	1	1	9299	Unique	Used	1.39305	3	709.368	2126.09	-0.574514	16.7868	956	956	MS2	18/60	Plasma_iTRAQ_4_6.raw
																gi11321561	sGAQATWTELPWPHEk	1	1	HCD	N-Term(iTRAQ4plex), K16(iTRAQ4plex)	21.0207	5.3197	1	1	19160	Unique	Used	1.51012	3	709.369	2126.09	0.889578	90.5572	8324	8324	MS2	22/60	Plasma_iTRAQ_6.raw
																gi11321561	sGAQATWTELPWPHEk	1	1	HCD	N-Term(iTRAQ4plex), K16(iTRAQ4plex)	23.4482	5.29613	1	1	12388	Unique	Used	1.40831	3	709.368	2126.09	-0.919007	68.971	4582	4582	MS2	21/60	Plasma_iTRAQ_4_6.raw
																gi11321561	sGAqATWTELPWPHEk	1	1	HCD	N-Term(iTRAQ4plex), Q4(Deamidated), K16(iTRAQ4plex)	1	5.11911	1	1	9393	Unique	Used	1.4857	3	709.704	2127.1	11.1296	18.4169	1069	1069	MS2	15/60	Plasma_iTRAQ_4_6.raw
																gi11321561	sGAQATWTELPWPHEk	1	1	HCD	N-Term(iTRAQ4plex), K16(iTRAQ4plex)	37.878	5.08263	1	1	15809	Unique	Used	1.31752	4	532.281	2126.1	4.93101	47.4129	4245	4245	MS2	24/90	Plasma_iTRAQ_6.raw
																gi11321561	sGAQATWTELPWPHEk	1	1	HCD	N-Term(iTRAQ4plex), K16(iTRAQ4plex)	48.2979	5.00561	1	1	10292	Unique	Used	1.47885	3	709.37	2126.1	2.18142	34.2056	2151	2151	MS2	26/60	Plasma_iTRAQ_4_6.raw
																gi11321561	sGAqATWTELPWPHEk	1	1	HCD	N-Term(iTRAQ4plex), Q4(Deamidated), K16(iTRAQ4plex)	41.9289	4.92268	1	1	16025	Unique	Used	1.55269	3	709.698	2127.08	1.57444	49.6747	4496	4496	MS2	27/60	Plasma_iTRAQ_6.raw
																gi11321561	sGAQATWTELPWPHEk	1	1	HCD	N-Term(iTRAQ4plex), K16(iTRAQ4plex)	34.1883	4.68507	1	1	14238	Unique	Used	1.39307	3	709.373	2126.1	6.05693	31.2387	2432	2432	MS2	19/60	Plasma_iTRAQ_6.raw
																gi11321561	sGAqATWTELPWPHEk	1	1	HCD	N-Term(iTRAQ4plex), Q4(Deamidated), K16(iTRAQ4plex)	1	4.56679	1	1	9277	Unique	Used	1.38958	3	709.703	2127.09	8.80536	16.3776	928	928	MS2	14/60	Plasma_iTRAQ_4_6.raw
																gi11321561	sGAQATWTELPWPHEk	1	1	HCD	N-Term(iTRAQ4plex), K16(iTRAQ4plex)	9.06451	3.92412	1	1	16289	Unique	Used	1.57439	4	532.277	2126.09	-1.72915	54.2209	5053	5053	MS2	22/90	Plasma_iTRAQ_4.raw
																gi11321561	sGAqATWTELPWPHEk	1	1	HCD	N-Term(iTRAQ4plex), Q4(Deamidated), K16(iTRAQ4plex)	1	3.84236	1	1	19208	Unique	Used	1.24842	3	709.703	2127.09	9.14968	91.6094	8392	8392	MS2	16/60	Plasma_iTRAQ_6.raw
																gi11321561	sGAQATWTELPWPHEk	1	1	HCD	N-Term(iTRAQ4plex), K16(iTRAQ4plex)	75.6125	3.61962	1	1	11772	Unique	Used	1.28467	2	1063.55	2126.09	-0.855267	59.0331	3874	3874	MS2	18/30	Plasma_iTRAQ_4_6.raw
																gi11321561	sLGPNScSAnGPGLYLIHGPNLYcYSDVEk	1	1	HCD	N-Term(iTRAQ4plex), C7(Methylthio), N10(Deamidated), C24(Methylthio), K30(iTRAQ4plex)	133.461	9.34179	1	1	13021	Unique	Used	2.2143	3	1183.89	3549.65	1.7326	78.3091	5325	5325	MS2	35/116	Plasma_iTRAQ_4_6.raw
																gi11321561	sLGPnScSAnGPGLYLIHGPNLYcYSDVEk	1	1	HCD	N-Term(iTRAQ4plex), N5(Deamidated), C7(Methylthio), N10(Deamidated), C24(Methylthio), K30(iTRAQ4plex)	135.744	9.23943	1	1	17765	Unique	Used	2.39598	3	1184.22	3550.64	3.27718	70.8655	6653	6653	MS2	37/116	Plasma_iTRAQ_6.raw
																gi11321561	sLGPNScSAnGPGLYLIHGPNLYcYSDVEk	1	1	HCD	N-Term(iTRAQ4plex), C7(Methylthio), N10(Deamidated), C24(Methylthio), K30(iTRAQ4plex)	141.221	9.22466	1	1	9594	Unique	Used	2.12035	3	1183.88	3549.64	-0.124428	71.5427	5048	5048	MS2	35/116	Plasma_iTRAQ_8.raw
																gi11321561	sLGPNScSAnGPGLYLIHGPNLYcYSDVEk	1	1	HCD	N-Term(iTRAQ4plex), C7(Methylthio), N10(Deamidated), C24(Methylthio), K30(iTRAQ4plex)	300	9.22458	1	1	12074	Unique	Used	2.20484	3	1183.89	3549.64	0.907256	63.951	4221	4221	MS2	34/116	Plasma_iTRAQ_4_6.raw
																gi11321561	sLGPnScSAnGPGLYLIHGPNLYcYSDVEk	1	1	HCD	N-Term(iTRAQ4plex), N5(Deamidated), C7(Methylthio), N10(Deamidated), C24(Methylthio), K30(iTRAQ4plex)	149.546	9.1844	1	1	12158	Unique	Used	2.91697	3	1184.22	3550.64	3.48346	65.3618	4320	4320	MS2	37/116	Plasma_iTRAQ_4_6.raw
																gi11321561	sLGPNScSAnGPGLYLIHGPNLYcYSDVEk	1	1	HCD	N-Term(iTRAQ4plex), C7(Methylthio), N10(Deamidated), C24(Methylthio), K30(iTRAQ4plex)	141.221	9.12592	1	1	12610	Unique	Used	2.6262	3	1183.89	3549.64	0.907256	72.3585	4834	4834	MS2	35/116	Plasma_iTRAQ_4_6.raw
																gi11321561	sLGPNScSANGPGLYLIHGPNLYcYSDVEk	1	1	HCD	N-Term(iTRAQ4plex), C7(Methylthio), C24(Methylthio), K30(iTRAQ4plex)	138.542	9.05152	1	1	17306	Unique	Used	1.96567	3	1183.56	3548.66	0.599949	64.1118	6036	6036	MS2	37/116	Plasma_iTRAQ_6.raw
																gi11321561	sLGPNScSAnGPGLYLIHGPNLYcYSDVEk	1	1	HCD	N-Term(iTRAQ4plex), C7(Methylthio), N10(Deamidated), C24(Methylthio), K30(iTRAQ4plex)	300	9.0408	1	1	19135	Unique	Used	2.82134	3	1183.88	3549.64	-0.227597	90.0301	8289	8289	MS2	34/116	Plasma_iTRAQ_6.raw
																gi11321561	sLGPNScSAnGPGLYLIHGPNLYcYSDVEk	1	1	HCD	N-Term(iTRAQ4plex), C7(Methylthio), N10(Deamidated), C24(Methylthio), K30(iTRAQ4plex)	300	9.03535	1	1	13726	Unique	Used	2.07982	3	1183.89	3549.65	1.93894	89.5418	6135	6135	MS2	31/116	Plasma_iTRAQ_4_6.raw
																gi11321561	sLGPnScSAnGPGLYLIHGPNLYcYSDVEk	1	1	HCD	N-Term(iTRAQ4plex), N5(Deamidated), C7(Methylthio), N10(Deamidated), C24(Methylthio), K30(iTRAQ4plex)	149.546	8.85227	1	1	12690	Unique	Used	2.84965	3	1184.21	3550.63	1.73009	73.5168	4923	4923	MS2	37/116	Plasma_iTRAQ_4_6.raw
																gi11321561	sLGPnScSAnGPGLYLIHGPNLYcYSDVEk	1	1	HCD	N-Term(iTRAQ4plex), N5(Deamidated), C7(Methylthio), N10(Deamidated), C24(Methylthio), K30(iTRAQ4plex)	150.003	8.83696	1	1	14556	Unique	Used	2.87915	3	1184.22	3550.63	2.03951	68.1173	6011	6011	MS2	38/116	Plasma_iTRAQ_7.raw
																gi11321561	sLGPNScSAnGPGLYLIHGPNLYcYSDVEk	1	1	HCD	N-Term(iTRAQ4plex), C7(Methylthio), N10(Deamidated), C24(Methylthio), K30(iTRAQ4plex)	142.386	8.79438	1	1	13101	Unique	Used	2.12997	3	1183.88	3549.63	-4.25118	79.8301	5436	5436	MS2	31/116	Plasma_iTRAQ_4_6.raw
																gi11321561	sLGPNScSAnGPGLYLIHGPnLYcYSDVEk	1	1	HCD	N-Term(iTRAQ4plex), C7(Methylthio), N10(Deamidated), N21(Deamidated), C24(Methylthio), K30(iTRAQ4plex)	82.1557	8.66236	1	1	19070	Unique	Used	2.55969	4	888.415	3550.64	3.4281	88.7877	8207	8207	MS2	33/174	Plasma_iTRAQ_6.raw
																gi11321561	sLGPnScSAnGPGLYLIHGPNLYcYSDVEk	1	1	HCD	N-Term(iTRAQ4plex), N5(Deamidated), C7(Methylthio), N10(Deamidated), C24(Methylthio), K30(iTRAQ4plex)	136.713	8.57951	1	1	18079	Unique	Used	2.10389	3	1184.21	3550.63	1.11125	75.7476	7081	7081	MS2	31/116	Plasma_iTRAQ_6.raw
																gi11321561	sLGPNScSAnGPGLYLIHGPNLYcYSDVEk	1	1	HCD	N-Term(iTRAQ4plex), C7(Methylthio), N10(Deamidated), C24(Methylthio), K30(iTRAQ4plex)	300	8.51647	1	1	12926	Unique	Used	3.36678	3	1183.89	3549.66	5.96248	76.7781	5198	5198	MS2	32/116	Plasma_iTRAQ_4_6.raw
																gi11321561	sLGPnScSAnGPGLYLIHGPNLYcYSDVEk	1	1	HCD	N-Term(iTRAQ4plex), N5(Deamidated), C7(Methylthio), N10(Deamidated), C24(Methylthio), K30(iTRAQ4plex)	300	8.49905	1	1	17671	Unique	Used	2.70507	3	1184.21	3550.63	1.52381	69.2608	6516	6516	MS2	31/116	Plasma_iTRAQ_6.raw
																gi11321561	sLGPNScSAnGPGLYLIHGPNLYcYSDVEk	1	1	HCD	N-Term(iTRAQ4plex), C7(Methylthio), N10(Deamidated), C24(Methylthio), K30(iTRAQ4plex)	300	8.4445	1	1	14460	Unique	Used	2.30241	3	1183.89	3549.64	1.21676	66.5158	5871	5871	MS2	43/116	Plasma_iTRAQ_7.raw
																gi11321561	sLGPnScSAnGPGLYLIHGPNLYcYSDVEk	1	1	HCD	N-Term(iTRAQ4plex), N5(Deamidated), C7(Methylthio), N10(Deamidated), C24(Methylthio), K30(iTRAQ4plex)	125.44	8.42888	1	1	17875	Unique	Used	2.16337	3	1184.22	3550.64	5.03054	72.6393	6806	6806	MS2	30/116	Plasma_iTRAQ_6.raw
																gi11321561	sLGPNScSAnGPGLYLIHGPNLYcYSDVEk	1	1	HCD	N-Term(iTRAQ4plex), C7(Methylthio), N10(Deamidated), C24(Methylthio), K30(iTRAQ4plex)	300	8.37647	1	1	17456	Unique	Used	2.83979	3	1183.89	3549.64	0.804087	65.9694	6225	6225	MS2	35/116	Plasma_iTRAQ_6.raw
																gi11321561	sLGPNScSAnGPGLYLIHGPNLYcYSDVEk	1	1	HCD	N-Term(iTRAQ4plex), C7(Methylthio), N10(Deamidated), C24(Methylthio), K30(iTRAQ4plex)	135.232	8.35011	1	1	17355	Unique	Used	2.20706	3	1183.88	3549.64	-0.640271	64.7699	6100	6100	MS2	42/116	Plasma_iTRAQ_6.raw
																gi11321561	sLGPNScSAnGPGLYLIHGPNLYcYSDVEk	1	1	HCD	N-Term(iTRAQ4plex), C7(Methylthio), N10(Deamidated), C24(Methylthio), K30(iTRAQ4plex)	300	8.29993	1	1	11805	Unique	Used	2.3886	3	1183.89	3549.64	1.11359	59.5485	3912	3912	MS2	40/116	Plasma_iTRAQ_4_6.raw
																gi11321561	sLGPnScSAnGPGLYLIHGPNLYcYSDVEk	1	1	HCD	N-Term(iTRAQ4plex), N5(Deamidated), C7(Methylthio), N10(Deamidated), C24(Methylthio), K30(iTRAQ4plex)	144.105	8.29565	1	1	17618	Unique	Used	100	4	888.415	3550.64	3.97818	68.4096	6442	6442	MS2	38/174	Plasma_iTRAQ_6.raw
																gi11321561	sLGPnScSAnGPGLYLIHGPNLYcYSDVEk	1	1	HCD	N-Term(iTRAQ4plex), N5(Deamidated), C7(Methylthio), N10(Deamidated), C24(Methylthio), K30(iTRAQ4plex)	300	8.24272	1	1	17595	Unique	Used	2.65353	3	1184.22	3550.63	1.93637	68.0616	6411	6411	MS2	33/116	Plasma_iTRAQ_6.raw
																gi11321561	sLGPNScSAnGPGLYLIHGPNLYcYSDVEk	1	1	HCD	N-Term(iTRAQ4plex), C7(Methylthio), N10(Deamidated), C24(Methylthio), K30(iTRAQ4plex)	121.22	8.03208	1	1	12947	Unique	Used	1.44507	4	888.171	3549.66	5.66638	77.0061	5222	5222	MS2	31/174	Plasma_iTRAQ_4_6.raw
																gi11321561	sLGPNScSAnGPGLYLIHGPNLYcYSDVEk	1	1	HCD	N-Term(iTRAQ4plex), C7(Methylthio), N10(Deamidated), C24(Methylthio), K30(iTRAQ4plex)	300	8.02585	1	1	11727	Unique	Used	2.7579	3	1183.88	3549.63	-1.46562	58.3811	3825	3825	MS2	34/116	Plasma_iTRAQ_4_6.raw
																gi11321561	sLGPnScSAnGPGLYLIHGPNLYcYSDVEk	1	1	HCD	N-Term(iTRAQ4plex), N5(Deamidated), C7(Methylthio), N10(Deamidated), C24(Methylthio), K30(iTRAQ4plex)	145.232	7.97339	1	1	9617	Unique	Used	1.87257	3	1184.22	3550.63	2.86462	72.2327	5092	5092	MS2	34/116	Plasma_iTRAQ_8.raw
																gi11321561	sLGPNScSAnGPGLYLIHGPnLYcYSDVEk	1	1	HCD	N-Term(iTRAQ4plex), C7(Methylthio), N10(Deamidated), N21(Deamidated), C24(Methylthio), K30(iTRAQ4plex)	121.23	7.93974	1	1	17551	Unique	Used	4.37123	4	888.416	3550.64	5.42212	67.189	6344	6344	MS2	33/174	Plasma_iTRAQ_6.raw
																gi11321561	sLGPNScSAnGPGLYLIHGPNLYcYSDVEk	1	1	HCD	N-Term(iTRAQ4plex), C7(Methylthio), N10(Deamidated), C24(Methylthio), K30(iTRAQ4plex)	136.492	7.84673	1	1	17465	Unique	Used	100	4	888.167	3549.65	2.15868	66.0457	6235	6235	MS2	36/174	Plasma_iTRAQ_6.raw
																gi11321561	sLGPNScSAnGPGLYLIHGPNLYcYSDVEk	1	1	HCD	N-Term(iTRAQ4plex), C7(Methylthio), N10(Deamidated), C24(Methylthio), K30(iTRAQ4plex)	97.3359	7.80369	1	1	18074	Unique	Used	1.85154	3	1183.89	3549.64	0.907256	75.6893	7075	7075	MS2	26/116	Plasma_iTRAQ_6.raw
																gi11321561	sLGPnScSANGPGLYLIHGPNLYcYSDVEk	1	1	HCD	N-Term(iTRAQ4plex), N5(Deamidated), C7(Methylthio), C24(Methylthio), K30(iTRAQ4plex)	128.45	7.67568	1	1	11921	Unique	Used	3.19688	3	1183.89	3549.65	2.76428	61.5109	4047	4047	MS2	26/116	Plasma_iTRAQ_4_6.raw
																gi11321561	sLGPNScSAnGPGLYLIHGPNLYcYSDVEk	1	1	HCD	N-Term(iTRAQ4plex), C7(Methylthio), N10(Deamidated), C24(Methylthio), K30(iTRAQ4plex)	300	7.6515	1	1	11619	Unique	Used	2.66158	3	1183.88	3549.64	-1.15611	56.6301	3702	3702	MS2	37/116	Plasma_iTRAQ_4_6.raw
																gi11321561	sLGPNScSAnGPGLYLIHGPNLYcYSDVEk	1	1	HCD	N-Term(iTRAQ4plex), C7(Methylthio), N10(Deamidated), C24(Methylthio), K30(iTRAQ4plex)	138.054	7.57863	1	1	17846	Unique	Used	2.20164	3	1183.89	3549.65	1.93894	72.1065	6763	6763	MS2	32/116	Plasma_iTRAQ_6.raw
																gi11321561	sLGPNScSAnGPGLYLIHGPNLYcYSDVEk	1	1	HCD	N-Term(iTRAQ4plex), C7(Methylthio), N10(Deamidated), C24(Methylthio), K30(iTRAQ4plex)	100.983	7.50198	1	1	12609	Unique	Used	2.30608	4	888.166	3549.64	0.43921	72.3506	4833	4833	MS2	25/174	Plasma_iTRAQ_4_6.raw
																gi11321561	sLGPNScSAnGPGLYLIHGPNLYcYSDVEk	1	1	HCD	N-Term(iTRAQ4plex), C7(Methylthio), N10(Deamidated), C24(Methylthio), K30(iTRAQ4plex)	140.625	7.32732	1	1	12225	Unique	Used	1.83625	3	1183.88	3549.63	-3.73534	66.4555	4398	4398	MS2	33/116	Plasma_iTRAQ_4_6.raw
																gi11321561	sLGPnScSAnGPGLYLIHGPNLYcYSDVEk	1	1	HCD	N-Term(iTRAQ4plex), N5(Deamidated), C7(Methylthio), N10(Deamidated), C24(Methylthio), K30(iTRAQ4plex)	123.755	7.29468	1	1	17701	Unique	Used	5.50394	4	888.418	3550.65	6.7973	69.7752	6560	6560	MS2	28/174	Plasma_iTRAQ_6.raw
																gi11321561	sLGPNScSAnGPGLyLIHGPNLYcYSDVEk	1	1	HCD	N-Term(iTRAQ4plex), C7(Methylthio), N10(Deamidated), Y15(iTRAQ4plex), C24(Methylthio), K30(iTRAQ4plex)	84.7588	7.25522	1	1	14033	Unique	Used	2.36336	3	1231.92	3693.75	1.69475	59.6563	5268	5268	MS2	25/116	Plasma_iTRAQ_7.raw
																gi11321561	sLGPNScSAnGPGLYLIHGPNLYcYSDVEk	1	1	HCD	N-Term(iTRAQ4plex), C7(Methylthio), N10(Deamidated), C24(Methylthio), K30(iTRAQ4plex)	131.41	7.12493	1	1	18219	Unique	Used	2.62128	3	1183.88	3549.64	-0.537102	77.1268	7242	7242	MS2	29/116	Plasma_iTRAQ_6.raw
																gi11321561	sLGPnScSAnGPGLYLIHGPNLYcYSDVEk	1	1	HCD	N-Term(iTRAQ4plex), N5(Deamidated), C7(Methylthio), N10(Deamidated), C24(Methylthio), K30(iTRAQ4plex)	96.4299	7.07801	1	1	12671	Unique	Used	2.6644	4	888.414	3550.63	2.60299	73.2077	4901	4901	MS2	28/174	Plasma_iTRAQ_4_6.raw
																gi11321561	sLGPnScSAnGPGLYLIHGPNLYcYSDVEk	1	1	HCD	N-Term(iTRAQ4plex), N5(Deamidated), C7(Methylthio), N10(Deamidated), C24(Methylthio), K30(iTRAQ4plex)	135.835	7.02628	1	1	14551	Unique	Used	1.17672	4	888.412	3550.63	0.608957	68.0408	6004	6004	MS2	26/174	Plasma_iTRAQ_7.raw
																gi11321561	sLGPNScSAnGPGLYLIHGPNLycYSDVEk	1	1	HCD	N-Term(iTRAQ4plex), C7(Methylthio), N10(Deamidated), Y23(iTRAQ4plex), C24(Methylthio), K30(iTRAQ4plex)	74.507	6.88043	1	1	14102	Unique	Used	2.7028	4	924.193	3693.75	2.46773	60.5817	5357	5357	MS2	27/174	Plasma_iTRAQ_7.raw
																gi11321561	sLGPnScSAnGPGLYLIHGPNLYcySDVEk	1	1	HCD	N-Term(iTRAQ4plex), N5(Deamidated), C7(Methylthio), N10(Deamidated), C24(Methylthio), Y25(iTRAQ4plex), K30(iTRAQ4plex)	114.508	6.75779	1	1	14147	Unique	Used	2.83759	4	924.441	3694.74	3.81971	61.2749	5420	5420	MS2	31/174	Plasma_iTRAQ_7.raw
																gi11321561	sLGPnScSAnGPGLYLIHGPNLYcySDVEk	1	1	HCD	N-Term(iTRAQ4plex), N5(Deamidated), C7(Methylthio), N10(Deamidated), C24(Methylthio), Y25(iTRAQ4plex), K30(iTRAQ4plex)	86.4198	6.60599	1	1	9404	Unique	Used	2.27282	4	924.441	3694.74	4.67872	65.8305	4688	4688	MS2	33/174	Plasma_iTRAQ_8.raw
																gi11321561	sLGPnScSANGPGLYLIHGPNLYcYSDVEk	1	1	HCD	N-Term(iTRAQ4plex), N5(Deamidated), C7(Methylthio), C24(Methylthio), K30(iTRAQ4plex)	92.5489	6.44797	1	1	19071	Unique	Used	1.54184	4	888.167	3549.64	1.33334	88.827	8209	8209	MS2	23/174	Plasma_iTRAQ_6.raw
																gi11321561	sLGPNScSAnGPGLYLIHGPNLYcYSDVEk	1	1	HCD	N-Term(iTRAQ4plex), C7(Methylthio), N10(Deamidated), C24(Methylthio), K30(iTRAQ4plex)	134.056	6.37531	1	1	13758	Unique	Used	1.90801	4	888.167	3549.65	2.22746	90.1369	6176	6176	MS2	21/174	Plasma_iTRAQ_4_6.raw
																gi11321561	sLGPNScSAnGPGLyLIHGPNLYcYSDVEk	1	1	HCD	N-Term(iTRAQ4plex), C7(Methylthio), N10(Deamidated), Y15(iTRAQ4plex), C24(Methylthio), K30(iTRAQ4plex)	58.1403	6.34941	1	1	9325	Unique	Used	1.69315	4	924.194	3693.75	2.8643	64.1064	4564	4564	MS2	25/174	Plasma_iTRAQ_8.raw
																gi11321561	sLGPNScSAnGPGLYLIHGPNLYcYSDVEk	1	1	HCD	N-Term(iTRAQ4plex), C7(Methylthio), N10(Deamidated), C24(Methylthio), K30(iTRAQ4plex)	132.556	6.30067	1	1	14467	Unique	Used	1.65415	4	888.167	3549.65	1.88357	66.628	5881	5881	MS2	30/174	Plasma_iTRAQ_7.raw
																gi11321561	sLGPNScSANGPGLYLIHGPnLYcYSDVEk	1	1	HCD	N-Term(iTRAQ4plex), C7(Methylthio), N21(Deamidated), C24(Methylthio), K30(iTRAQ4plex)	83.7104	6.08831	1	1	11944	Unique	Used	2.84493	4	888.166	3549.64	0.851884	61.8883	4073	4073	MS2	26/174	Plasma_iTRAQ_4_6.raw
																gi11321561	sLGPNScSAnGPGLYLIHGPnLYcYSDVEk	1	1	HCD	N-Term(iTRAQ4plex), C7(Methylthio), N10(Deamidated), N21(Deamidated), C24(Methylthio), K30(iTRAQ4plex)	111.541	6.03301	1	1	13088	Unique	Used	2.04049	4	888.417	3550.65	5.90344	79.6143	5420	5420	MS2	25/174	Plasma_iTRAQ_4_6.raw
																gi11321561	sLGPnScSAnGPGLyLIHGPNLYcYSDVEk	1	1	HCD	N-Term(iTRAQ4plex), N5(Deamidated), C7(Methylthio), N10(Deamidated), Y15(iTRAQ4plex), C24(Methylthio), K30(iTRAQ4plex)	63.1848	6.02615	1	1	14220	Unique	Used	2.05455	4	924.439	3694.73	1.96954	62.4906	5526	5526	MS2	21/174	Plasma_iTRAQ_7.raw
																gi11321561	sLGPnScSAnGPGLYLIHGPNLycYSDVEk	1	1	HCD	N-Term(iTRAQ4plex), N5(Deamidated), C7(Methylthio), N10(Deamidated), Y23(iTRAQ4plex), C24(Methylthio), K30(iTRAQ4plex)	66.275	6.0127	1	1	14149	Unique	Used	2.31357	3	1232.25	3694.73	1.29588	61.3311	5424	5424	MS2	26/116	Plasma_iTRAQ_7.raw
																gi11321561	sLGPNScSAnGPGLYLIHGPNLYcYSDVEk	1	1	HCD	N-Term(iTRAQ4plex), C7(Methylthio), N10(Deamidated), C24(Methylthio), K30(iTRAQ4plex)	84.5591	5.9716	1	1	17009	Unique	Used	1.348	4	888.169	3549.65	3.74059	60.6776	5674	5674	MS2	30/174	Plasma_iTRAQ_6.raw
																gi11321561	sLGPnScSANGPGLYLIHGPNLYcYSDVEk	1	1	HCD	N-Term(iTRAQ4plex), N5(Deamidated), C7(Methylthio), C24(Methylthio), K30(iTRAQ4plex)	66.2853	5.83181	1	1	13123	Unique	Used	2.69966	4	888.166	3549.64	0.783105	80.2295	5463	5463	MS2	19/174	Plasma_iTRAQ_4_6.raw
																gi11321561	sLGPNScSAnGPGLyLIHGPNLYcYSDVEk	1	1	HCD	N-Term(iTRAQ4plex), C7(Methylthio), N10(Deamidated), Y15(iTRAQ4plex), C24(Methylthio), K30(iTRAQ4plex)	47.3867	5.73113	1	1	14010	Unique	Used	1.973	4	924.193	3693.75	2.66602	59.3411	5237	5237	MS2	21/174	Plasma_iTRAQ_7.raw
																gi11321561	sLGPNScSAnGPGLYLIHGPnLYcYSDVEk	1	1	HCD	N-Term(iTRAQ4plex), C7(Methylthio), N10(Deamidated), N21(Deamidated), C24(Methylthio), K30(iTRAQ4plex)	50.2758	5.7262	1	1	13763	Unique	Used	1.85237	4	888.418	3550.65	7.07234	90.2411	6183	6183	MS2	23/174	Plasma_iTRAQ_4_6.raw
																gi11321561	sLGPnScSANGPGLYLIHGPNLYcYSDVEk	1	1	HCD	N-Term(iTRAQ4plex), N5(Deamidated), C7(Methylthio), C24(Methylthio), K30(iTRAQ4plex)	78.9329	5.68323	1	1	17836	Unique	Used	6.17238	4	888.168	3549.65	2.36502	71.9676	6750	6750	MS2	25/174	Plasma_iTRAQ_6.raw
																gi11321561	sLGPnScSANGPGLYLIHGPNLYcYSDVEk	1	1	HCD	N-Term(iTRAQ4plex), N5(Deamidated), C7(Methylthio), C24(Methylthio), K30(iTRAQ4plex)	93.2055	5.57484	1	1	12353	Unique	Used	1.78956	3	1183.88	3549.64	-1.25928	68.4165	4542	4542	MS2	31/116	Plasma_iTRAQ_4_6.raw
																gi11321561	sLGPNScSAnGPGLYLIHGPNLYcYSDVEk	1	1	HCD	N-Term(iTRAQ4plex), C7(Methylthio), N10(Deamidated), C24(Methylthio), K30(iTRAQ4plex)	96.412	5.25735	1	1	13015	Unique	Used	4.25772	4	888.167	3549.65	2.0899	78.2035	5317	5317	MS2	25/174	Plasma_iTRAQ_4_6.raw
																gi11321561	sLGPNScSAnGPGLyLIHGPNLYcYSDVEk	1	1	HCD	N-Term(iTRAQ4plex), C7(Methylthio), N10(Deamidated), Y15(iTRAQ4plex), C24(Methylthio), K30(iTRAQ4plex)	39.2311	4.75385	1	1	14020	Unique	Used	1.02743	5	739.556	3693.75	2.62933	59.4894	5251	5251	MS2	28/232	Plasma_iTRAQ_7.raw
																gi11321561	sLGPNScSAnGPGLYLIHGPNLYcYSDVEk	1	1	HCD	N-Term(iTRAQ4plex), C7(Methylthio), N10(Deamidated), C24(Methylthio), K30(iTRAQ4plex)	76.3279	4.48788	1	1	18269	Unique	Used	24.5932	4	888.169	3549.66	4.29081	77.7194	7303	7303	MS2	24/174	Plasma_iTRAQ_6.raw
																gi11321561	sLGPNScSANGPGLYLIHGPnLYcYSDVEk	1	1	HCD	N-Term(iTRAQ4plex), C7(Methylthio), N21(Deamidated), C24(Methylthio), K30(iTRAQ4plex)	92.5821	4.19571	1	1	10810	Unique	Used	0.925873	4	888.166	3549.64	0.851884	90.0538	6532	6532	MS2	25/174	Plasma_iTRAQ_8.raw
																gi11321561	sWPAVGNcSSALR	1	1	HCD	N-Term(iTRAQ4plex), C8(Methylthio)	38.151	4.58198	1	1	16430	Unique	Used	1.78881	2	769.374	1537.74	1.89538	55.7709	5208	5208	MS2	18/24	Plasma_iTRAQ_4.raw
																gi11321561	sWPAVGncSSALR	1	1	HCD	N-Term(iTRAQ4plex), N7(Deamidated), C8(Methylthio)	52.3445	4.47884	1	1	16687	Unique	Used	2.15244	2	769.866	1538.72	1.81015	58.4763	5486	5486	MS2	19/24	Plasma_iTRAQ_4.raw
																gi11321561	vDGALcMEk	1	1	HCD	N-Term(iTRAQ4plex), C6(Methylthio), K9(iTRAQ4plex)	29.2236	4.25662	1	1	12336	Unique	Used	1.71613	2	650.321	1299.64	0.530469	49.7598	3280	3280	MS2	16/16	Plasma_iTRAQ_1_3.raw
																gi11321561	vDGALcMEk	1	1	HCD	N-Term(iTRAQ4plex), C6(Methylthio), K9(iTRAQ4plex)	43.3212	4.08894	1	1	6004	Unique	Used	1.71863	2	650.322	1299.64	0.718322	7.40917	605	605	MS2	16/16	Plasma_iTRAQ_6_8.raw
																gi11321561	vDGALcMEk	1	1	HCD	N-Term(iTRAQ4plex), C6(Methylthio), K9(iTRAQ4plex)	28.9445	4.06993	1	1	7572	Unique	Used	1.93424	2	650.322	1299.64	1.84544	24.0247	2278	2278	MS2	16/16	Plasma_iTRAQ_6_8.raw
																gi11321561	vDGALcMEk	1	1	HCD	N-Term(iTRAQ4plex), C6(Methylthio), K9(iTRAQ4plex)	29.9256	4.06804	1	1	6620	Unique	Used	2.01931	2	650.322	1299.64	0.624395	15.2963	1262	1262	MS2	16/16	Plasma_iTRAQ_6_8.raw
																gi11321561	vDGALcMEk	1	1	HCD	N-Term(iTRAQ4plex), C6(Methylthio), K9(iTRAQ4plex)	31.5977	4.0655	1	1	6752	Unique	Used	1.95974	2	650.322	1299.64	1.0001	16.6608	1403	1403	MS2	16/16	Plasma_iTRAQ_6_8.raw
																gi11321561	vDGALcMEk	1	1	HCD	N-Term(iTRAQ4plex), C6(Methylthio), K9(iTRAQ4plex)	29.5504	4.06325	1	1	7561	Unique	Used	1.94959	2	650.322	1299.64	1.37581	23.9376	2266	2266	MS2	16/16	Plasma_iTRAQ_6_8.raw
																gi11321561	vDGALcMEk	1	1	HCD	N-Term(iTRAQ4plex), C6(Methylthio), K9(iTRAQ4plex)	31.6511	4.05941	1	1	6815	Unique	Used	1.79614	2	650.321	1299.64	0.530469	17.2521	1470	1470	MS2	16/16	Plasma_iTRAQ_6_8.raw
																gi11321561	vDGALcMEk	1	1	HCD	N-Term(iTRAQ4plex), C6(Methylthio), K9(iTRAQ4plex)	49.9279	4.05888	1	1	7544	Unique	Used	2.0316	2	650.322	1299.64	1.75151	23.8145	2248	2248	MS2	16/16	Plasma_iTRAQ_6_8.raw
																gi11321561	vDGALcMEk	1	1	HCD	N-Term(iTRAQ4plex), C6(Methylthio), K9(iTRAQ4plex)	34.0194	4.05741	1	1	6526	Unique	Used	1.85394	2	650.321	1299.64	0.436542	14.1647	1162	1162	MS2	16/16	Plasma_iTRAQ_6_8.raw
																gi11321561	vDGALcMEk	1	1	HCD	N-Term(iTRAQ4plex), C6(Methylthio), K9(iTRAQ4plex)	22.5473	4.05141	1	1	6197	Unique	Used	1.89774	2	650.321	1299.64	0.436542	9.92958	811	811	MS2	16/16	Plasma_iTRAQ_6_8.raw
																gi11321561	vDGALcMEk	1	1	HCD	N-Term(iTRAQ4plex), C6(Methylthio), K9(iTRAQ4plex)	43.7718	4.04625	1	1	6521	Unique	Used	1.71419	2	650.321	1299.64	0.436542	14.1058	1157	1157	MS2	16/16	Plasma_iTRAQ_6_8.raw
																gi11321561	vDGALcMEk	1	1	HCD	N-Term(iTRAQ4plex), C6(Methylthio), K9(iTRAQ4plex)	46.3618	4.04399	1	1	8712	Unique	Used	1.94743	2	650.322	1299.64	1.0001	34.8944	3494	3494	MS2	16/16	Plasma_iTRAQ_6_8.raw
																gi11321561	vDGALcMEk	1	1	HCD	N-Term(iTRAQ4plex), C6(Methylthio), K9(iTRAQ4plex)	30.6331	4.04191	1	1	6633	Unique	Used	1.96415	2	650.322	1299.64	0.812248	15.4467	1276	1276	MS2	16/16	Plasma_iTRAQ_6_8.raw
																gi11321561	vDGALcMEk	1	1	HCD	N-Term(iTRAQ4plex), C6(Methylthio), K9(iTRAQ4plex)	29.4939	4.04078	1	1	7617	Unique	Used	1.7786	2	650.322	1299.64	1.09403	24.3564	2326	2326	MS2	16/16	Plasma_iTRAQ_6_8.raw
																gi11321561	vDGALcMEk	1	1	HCD	N-Term(iTRAQ4plex), C6(Methylthio), K9(iTRAQ4plex)	40.6532	4.03953	1	1	8694	Unique	Used	1.65041	2	650.322	1299.64	1.28188	34.6485	3475	3475	MS2	16/16	Plasma_iTRAQ_6_8.raw
																gi11321561	vDGALcMEk	1	1	HCD	N-Term(iTRAQ4plex), C6(Methylthio), K9(iTRAQ4plex)	45.8547	4.03908	1	1	6236	Unique	Used	1.64138	2	650.321	1299.64	0.530469	10.4182	853	853	MS2	16/16	Plasma_iTRAQ_6_8.raw
																gi11321561	vDGALcMEk	1	1	HCD	N-Term(iTRAQ4plex), C6(Methylthio), K9(iTRAQ4plex)	27.6965	4.035	1	1	14826	Unique	Used	2.06921	2	650.321	1299.64	0.0608358	39.1654	3456	3456	MS2	16/16	Plasma_iTRAQ_4.raw
																gi11321561	vDGALcMEk	1	1	HCD	N-Term(iTRAQ4plex), C6(Methylthio), K9(iTRAQ4plex)	29.1927	4.0345	1	1	8665	Unique	Used	1.92116	2	650.322	1299.64	0.812248	34.2179	3444	3444	MS2	16/16	Plasma_iTRAQ_6_8.raw
																gi11321561	vDGALcMEk	1	1	HCD	N-Term(iTRAQ4plex), C6(Methylthio), K9(iTRAQ4plex)	32.6243	4.0333	1	1	6567	Unique	Used	1.99722	2	650.322	1299.64	0.718322	14.6654	1206	1206	MS2	16/16	Plasma_iTRAQ_6_8.raw
																gi11321561	vDGALcMEk	1	1	HCD	N-Term(iTRAQ4plex), C6(Methylthio), K9(iTRAQ4plex)	48.3124	4.03305	1	1	8626	Unique	Used	1.96235	2	650.321	1299.63	-0.220944	33.6293	3402	3402	MS2	16/16	Plasma_iTRAQ_6_8.raw
																gi11321561	vDGALcMEk	1	1	HCD	N-Term(iTRAQ4plex), C6(Methylthio), K9(iTRAQ4plex)	43.3472	4.03262	1	1	8000	Unique	Used	1.78811	2	650.321	1299.64	0.342616	27.8918	2734	2734	MS2	16/16	Plasma_iTRAQ_6_8.raw
																gi11321561	vDGALcMEk	1	1	HCD	N-Term(iTRAQ4plex), C6(Methylthio), K9(iTRAQ4plex)	32.9627	4.03194	1	1	6722	Unique	Used	1.93254	2	650.322	1299.64	1.75151	16.3902	1371	1371	MS2	16/16	Plasma_iTRAQ_6_8.raw
																gi11321561	vDGALcMEk	1	1	HCD	N-Term(iTRAQ4plex), C6(Methylthio), K9(iTRAQ4plex)	41.4458	4.02924	1	1	6052	Unique	Used	1.93579	2	650.321	1299.64	0.530469	8.04705	656	656	MS2	16/16	Plasma_iTRAQ_6_8.raw
																gi11321561	vDGALcMEk	1	1	HCD	N-Term(iTRAQ4plex), C6(Methylthio), K9(iTRAQ4plex)	27.8677	4.02724	1	1	6730	Unique	Used	1.63482	2	650.322	1299.64	1.0001	16.4778	1380	1380	MS2	16/16	Plasma_iTRAQ_6_8.raw
																gi11321561	vDGALcMEk	1	1	HCD	N-Term(iTRAQ4plex), C6(Methylthio), K9(iTRAQ4plex)	46.4742	4.02541	1	1	6076	Unique	Used	1.6731	2	650.321	1299.63	-0.0330908	8.3605	682	682	MS2	16/16	Plasma_iTRAQ_6_8.raw
																gi11321561	vDGALcMEk	1	1	HCD	N-Term(iTRAQ4plex), C6(Methylthio), K9(iTRAQ4plex)	25.4519	4.0238	1	1	6669	Unique	Used	1.84999	2	650.322	1299.64	1.18795	15.8695	1315	1315	MS2	16/16	Plasma_iTRAQ_6_8.raw
																gi11321561	vDGALcMEk	1	1	HCD	N-Term(iTRAQ4plex), C6(Methylthio), K9(iTRAQ4plex)	37.9991	4.02292	1	1	6683	Unique	Used	1.89251	2	650.322	1299.64	1.09403	16.0187	1330	1330	MS2	16/16	Plasma_iTRAQ_6_8.raw
																gi11321561	vDGALcMEk	1	1	HCD	N-Term(iTRAQ4plex), C6(Methylthio), K9(iTRAQ4plex)	37.8024	4.02185	1	1	6183	Unique	Used	1.87537	2	650.322	1299.64	0.624395	9.7527	796	796	MS2	16/16	Plasma_iTRAQ_6_8.raw
																gi11321561	vDGALcMEk	1	1	HCD	N-Term(iTRAQ4plex), C6(Methylthio), K9(iTRAQ4plex)	30.1696	4.02159	1	1	6213	Unique	Used	1.98898	2	650.322	1299.64	1.0001	10.1314	828	828	MS2	16/16	Plasma_iTRAQ_6_8.raw
																gi11321561	vDGALcMEk	1	1	HCD	N-Term(iTRAQ4plex), C6(Methylthio), K9(iTRAQ4plex)	41.2297	4.01824	1	1	6803	Unique	Used	1.74607	2	650.321	1299.64	0.530469	17.1479	1458	1458	MS2	16/16	Plasma_iTRAQ_6_8.raw
																gi11321561	vDGALcMEk	1	1	HCD	N-Term(iTRAQ4plex), C6(Methylthio), K9(iTRAQ4plex)	41.0083	4.01725	1	1	7556	Unique	Used	1.94773	2	650.322	1299.64	1.37581	23.9089	2261	2261	MS2	16/16	Plasma_iTRAQ_6_8.raw
																gi11321561	vDGALcMEk	1	1	HCD	N-Term(iTRAQ4plex), C6(Methylthio), K9(iTRAQ4plex)	41.6311	4.0171	1	1	6806	Unique	Used	1.74516	2	650.321	1299.64	0.530469	17.1682	1461	1461	MS2	16/16	Plasma_iTRAQ_6_8.raw
																gi11321561	vDGALcMEk	1	1	HCD	N-Term(iTRAQ4plex), C6(Methylthio), K9(iTRAQ4plex)	44.3554	4.01641	1	1	6640	Unique	Used	1.84721	2	650.322	1299.64	0.718322	15.5405	1284	1284	MS2	16/16	Plasma_iTRAQ_6_8.raw
																gi11321561	vDGALcMEk	1	1	HCD	N-Term(iTRAQ4plex), C6(Methylthio), K9(iTRAQ4plex)	26.3262	4.01637	1	1	6647	Unique	Used	1.99625	2	650.322	1299.64	0.718322	15.6093	1291	1291	MS2	16/16	Plasma_iTRAQ_6_8.raw
																gi11321561	vDGALcMEk	1	1	HCD	N-Term(iTRAQ4plex), C6(Methylthio), K9(iTRAQ4plex)	49.7841	4.01591	1	1	6582	Unique	Used	1.99704	2	650.322	1299.64	0.906175	14.8427	1222	1222	MS2	16/16	Plasma_iTRAQ_6_8.raw
																gi11321561	vDGALcMEk	1	1	HCD	N-Term(iTRAQ4plex), C6(Methylthio), K9(iTRAQ4plex)	29.6797	4.01407	1	1	8697	Unique	Used	1.80736	2	650.322	1299.64	1.28188	34.6842	3478	3478	MS2	16/16	Plasma_iTRAQ_6_8.raw
																gi11321561	vDGALcMEk	1	1	HCD	N-Term(iTRAQ4plex), C6(Methylthio), K9(iTRAQ4plex)	35.9487	4.01301	1	1	8682	Unique	Used	1.85324	2	650.321	1299.64	0.436542	34.4702	3462	3462	MS2	16/16	Plasma_iTRAQ_6_8.raw
																gi11321561	vDGALcMEk	1	1	HCD	N-Term(iTRAQ4plex), C6(Methylthio), K9(iTRAQ4plex)	45.1542	4.01169	1	1	7538	Unique	Used	1.76594	2	650.322	1299.64	1.75151	23.7829	2242	2242	MS2	16/16	Plasma_iTRAQ_6_8.raw
																gi11321561	vDGALcMEk	1	1	HCD	N-Term(iTRAQ4plex), C6(Methylthio), K9(iTRAQ4plex)	41.399	4.01158	1	1	6623	Unique	Used	1.64551	2	650.322	1299.64	0.812248	15.3484	1266	1266	MS2	16/16	Plasma_iTRAQ_6_8.raw
																gi11321561	vDGALcMEk	1	1	HCD	N-Term(iTRAQ4plex), C6(Methylthio), K9(iTRAQ4plex)	30.9958	4.00914	1	1	6692	Unique	Used	1.86574	2	650.322	1299.64	1.09403	16.0829	1339	1339	MS2	16/16	Plasma_iTRAQ_6_8.raw
																gi11321561	vDGALcMEk	1	1	HCD	N-Term(iTRAQ4plex), C6(Methylthio), K9(iTRAQ4plex)	42.3545	4.00888	1	1	6609	Unique	Used	1.71436	2	650.322	1299.64	0.624395	15.1744	1251	1251	MS2	16/16	Plasma_iTRAQ_6_8.raw
																gi11321561	vDGALcMEk	1	1	HCD	N-Term(iTRAQ4plex), C6(Methylthio), K9(iTRAQ4plex)	39.0105	4.00815	1	1	7615	Unique	Used	1.61009	2	650.322	1299.64	1.09403	24.3447	2324	2324	MS2	16/16	Plasma_iTRAQ_6_8.raw
																gi11321561	vDGALcMEk	1	1	HCD	N-Term(iTRAQ4plex), C6(Methylthio), K9(iTRAQ4plex)	31.3427	4.00723	1	1	6251	Unique	Used	1.73983	2	650.322	1299.64	0.624395	10.6051	869	869	MS2	16/16	Plasma_iTRAQ_6_8.raw
																gi11321561	vDGALcMEk	1	1	HCD	N-Term(iTRAQ4plex), C6(Methylthio), K9(iTRAQ4plex)	28.9445	4.00677	1	1	7603	Unique	Used	1.94034	2	650.322	1299.64	1.56366	24.251	2311	2311	MS2	16/16	Plasma_iTRAQ_6_8.raw
																gi11321561	vDGALcMEk	1	1	HCD	N-Term(iTRAQ4plex), C6(Methylthio), K9(iTRAQ4plex)	28.4839	4.00576	1	1	5542	Unique	Used	1.80052	2	650.321	1299.64	0.154762	1.35964	112	112	MS2	16/16	Plasma_iTRAQ_6_8.raw
																gi11321561	vDGALcMEk	1	1	HCD	N-Term(iTRAQ4plex), C6(Methylthio), K9(iTRAQ4plex)	31.166	4.00565	1	1	8508	Unique	Used	1.81657	2	650.321	1299.63	-0.127017	32.4295	3276	3276	MS2	16/16	Plasma_iTRAQ_6_8.raw
																gi11321561	vDGALcMEk	1	1	HCD	N-Term(iTRAQ4plex), C6(Methylthio), K9(iTRAQ4plex)	42.5917	4.00464	1	1	7554	Unique	Used	1.73277	2	650.322	1299.64	1.37581	23.8976	2259	2259	MS2	16/16	Plasma_iTRAQ_6_8.raw
																gi11321561	vDGALcMEk	1	1	HCD	N-Term(iTRAQ4plex), C6(Methylthio), K9(iTRAQ4plex)	38.1501	4.00386	1	1	6714	Unique	Used	1.69552	2	650.322	1299.64	1.75151	16.333	1363	1363	MS2	16/16	Plasma_iTRAQ_6_8.raw
																gi11321561	vDGALcMEk	1	1	HCD	N-Term(iTRAQ4plex), C6(Methylthio), K9(iTRAQ4plex)	41.7228	4.00379	1	1	6594	Unique	Used	1.68139	2	650.322	1299.64	0.812248	14.9957	1235	1235	MS2	16/16	Plasma_iTRAQ_6_8.raw
																gi11321561	vDGALcMEk	1	1	HCD	N-Term(iTRAQ4plex), C6(Methylthio), K9(iTRAQ4plex)	42.138	4.00253	1	1	7541	Unique	Used	1.7717	2	650.322	1299.64	1.75151	23.7975	2245	2245	MS2	16/16	Plasma_iTRAQ_6_8.raw
																gi11321561	vDGALcMEk	1	1	HCD	N-Term(iTRAQ4plex), C6(Methylthio), K9(iTRAQ4plex)	38.5577	4.00241	1	1	7598	Unique	Used	1.60718	2	650.322	1299.64	1.56366	24.2252	2306	2306	MS2	16/16	Plasma_iTRAQ_6_8.raw
																gi11321561	vDGALcMEk	1	1	HCD	N-Term(iTRAQ4plex), C6(Methylthio), K9(iTRAQ4plex)	44.7134	4.00078	1	1	5688	Unique	Used	1.66304	2	650.321	1299.64	0.0608358	3.27932	268	268	MS2	16/16	Plasma_iTRAQ_6_8.raw
																gi11321561	vDGALcMEk	1	1	HCD	N-Term(iTRAQ4plex), C6(Methylthio), K9(iTRAQ4plex)	38.9482	3.99956	1	1	6564	Unique	Used	1.67238	2	650.322	1299.64	0.718322	14.639	1203	1203	MS2	16/16	Plasma_iTRAQ_6_8.raw
																gi11321561	vDGALcMEk	1	1	HCD	N-Term(iTRAQ4plex), C6(Methylthio), K9(iTRAQ4plex)	32.8533	3.99907	1	1	6872	Unique	Used	1.58401	2	650.321	1299.64	0.154762	17.8611	1531	1531	MS2	16/16	Plasma_iTRAQ_6_8.raw
																gi11321561	vDGALcMEk	1	1	HCD	N-Term(iTRAQ4plex), C6(Methylthio), K9(iTRAQ4plex)	25.6438	3.99687	1	1	6258	Unique	Used	1.84578	2	650.322	1299.64	0.624395	10.6887	876	876	MS2	16/16	Plasma_iTRAQ_6_8.raw
																gi11321561	vDGALcMEk	1	1	HCD	N-Term(iTRAQ4plex), C6(Methylthio), K9(iTRAQ4plex)	39.6855	3.99453	1	1	6177	Unique	Used	1.68758	2	650.322	1299.64	0.624395	9.67777	790	790	MS2	16/16	Plasma_iTRAQ_6_8.raw
																gi11321561	vDGALcMEk	1	1	HCD	N-Term(iTRAQ4plex), C6(Methylthio), K9(iTRAQ4plex)	43.4001	3.99453	1	1	6576	Unique	Used	1.95835	2	650.322	1299.64	0.718322	14.769	1215	1215	MS2	16/16	Plasma_iTRAQ_6_8.raw
																gi11321561	vDGALcMEk	1	1	HCD	N-Term(iTRAQ4plex), C6(Methylthio), K9(iTRAQ4plex)	27.6047	3.99412	1	1	6668	Unique	Used	1.80136	2	650.322	1299.64	1.18795	15.8656	1314	1314	MS2	16/16	Plasma_iTRAQ_6_8.raw
																gi11321561	vDGALcMEk	1	1	HCD	N-Term(iTRAQ4plex), C6(Methylthio), K9(iTRAQ4plex)	37.4304	3.99409	1	1	6535	Unique	Used	1.75936	2	650.322	1299.64	0.718322	14.2841	1172	1172	MS2	16/16	Plasma_iTRAQ_6_8.raw
																gi11321561	vDGALcMEk	1	1	HCD	N-Term(iTRAQ4plex), C6(Methylthio), K9(iTRAQ4plex)	28.7128	3.99382	1	1	6743	Unique	Used	1.77381	2	650.322	1299.64	1.0001	16.5955	1394	1394	MS2	16/16	Plasma_iTRAQ_6_8.raw
																gi11321561	vDGALcMEk	1	1	HCD	N-Term(iTRAQ4plex), C6(Methylthio), K9(iTRAQ4plex)	38.5131	3.99331	1	1	6047	Unique	Used	1.73329	2	650.321	1299.64	0.530469	7.98075	651	651	MS2	16/16	Plasma_iTRAQ_6_8.raw
																gi11321561	vDGALcMEk	1	1	HCD	N-Term(iTRAQ4plex), C6(Methylthio), K9(iTRAQ4plex)	39.4606	3.99157	1	1	5477	Unique	Used	1.71249	2	650.321	1299.64	0.436542	0.502263	43	43	MS2	16/16	Plasma_iTRAQ_6_8.raw
																gi11321561	vDGALcMEk	1	1	HCD	N-Term(iTRAQ4plex), C6(Methylthio), K9(iTRAQ4plex)	48.2423	3.99155	1	1	6553	Unique	Used	1.86736	2	650.321	1299.64	0.530469	14.4986	1191	1191	MS2	16/16	Plasma_iTRAQ_6_8.raw
																gi11321561	vDGALcMEk	1	1	HCD	N-Term(iTRAQ4plex), C6(Methylthio), K9(iTRAQ4plex)	40.4405	3.98964	1	1	6238	Unique	Used	1.82491	2	650.321	1299.64	0.530469	10.4413	855	855	MS2	16/16	Plasma_iTRAQ_6_8.raw
																gi11321561	vDGALcMEk	1	1	HCD	N-Term(iTRAQ4plex), C6(Methylthio), K9(iTRAQ4plex)	22.5192	3.98679	1	1	6744	Unique	Used	1.88986	2	650.322	1299.64	1.0001	16.5992	1395	1395	MS2	16/16	Plasma_iTRAQ_6_8.raw
																gi11321561	vDGALcMEk	1	1	HCD	N-Term(iTRAQ4plex), C6(Methylthio), K9(iTRAQ4plex)	24.4248	3.98644	1	1	7587	Unique	Used	1.87532	2	650.322	1299.64	1.75151	24.1354	2294	2294	MS2	16/16	Plasma_iTRAQ_6_8.raw
																gi11321561	vDGALcMEk	1	1	HCD	N-Term(iTRAQ4plex), C6(Methylthio), K9(iTRAQ4plex)	42.8325	3.98493	1	1	6121	Unique	Used	1.752	2	650.321	1299.64	0.436542	8.9456	730	730	MS2	16/16	Plasma_iTRAQ_6_8.raw
																gi11321561	vDGALcMEk	1	1	HCD	N-Term(iTRAQ4plex), C6(Methylthio), K9(iTRAQ4plex)	50.1624	3.98224	1	1	6021	Unique	Used	1.85815	2	650.321	1299.64	0.342616	7.63627	623	623	MS2	16/16	Plasma_iTRAQ_6_8.raw
																gi11321561	vDGALcMEk	1	1	HCD	N-Term(iTRAQ4plex), C6(Methylthio), K9(iTRAQ4plex)	38.5057	3.98185	1	1	7583	Unique	Used	1.66855	2	650.322	1299.64	1.75151	24.1154	2290	2290	MS2	16/16	Plasma_iTRAQ_6_8.raw
																gi11321561	vDGALcMEk	1	1	HCD	N-Term(iTRAQ4plex), C6(Methylthio), K9(iTRAQ4plex)	39.6056	3.97956	1	1	8540	Unique	Used	1.81258	2	650.323	1299.64	2.69077	32.743	3310	3310	MS2	16/16	Plasma_iTRAQ_6_8.raw
																gi11321561	vDGALcMEk	1	1	HCD	N-Term(iTRAQ4plex), C6(Methylthio), K9(iTRAQ4plex)	43.8991	3.97868	1	1	6550	Unique	Used	1.71042	2	650.321	1299.64	0.530469	14.4675	1188	1188	MS2	16/16	Plasma_iTRAQ_6_8.raw
																gi11321561	vDGALcMEk	1	1	HCD	N-Term(iTRAQ4plex), C6(Methylthio), K9(iTRAQ4plex)	28.0169	3.9745	1	1	6676	Unique	Used	1.91471	2	650.322	1299.64	1.18795	15.9299	1322	1322	MS2	16/16	Plasma_iTRAQ_6_8.raw
																gi11321561	vDGALcMEk	1	1	HCD	N-Term(iTRAQ4plex), C6(Methylthio), K9(iTRAQ4plex)	42.2603	3.97405	1	1	6638	Unique	Used	1.682	2	650.322	1299.64	0.718322	15.5288	1282	1282	MS2	16/16	Plasma_iTRAQ_6_8.raw
																gi11321561	vDGALcMEk	1	1	HCD	N-Term(iTRAQ4plex), C6(Methylthio), K9(iTRAQ4plex)	27.3695	3.97367	1	1	6538	Unique	Used	1.85441	2	650.322	1299.64	0.718322	14.3158	1175	1175	MS2	16/16	Plasma_iTRAQ_6_8.raw
																gi11321561	vDGALcMEk	1	1	HCD	N-Term(iTRAQ4plex), C6(Methylthio), K9(iTRAQ4plex)	42.4056	3.97273	1	1	6146	Unique	Used	1.78802	2	650.321	1299.64	0.530469	9.28016	757	757	MS2	16/16	Plasma_iTRAQ_6_8.raw
																gi11321561	vDGALcMEk	1	1	HCD	N-Term(iTRAQ4plex), C6(Methylthio), K9(iTRAQ4plex)	41.0876	3.96819	1	1	6125	Unique	Used	1.99712	2	650.321	1299.64	0.436542	8.99731	734	734	MS2	16/16	Plasma_iTRAQ_6_8.raw
																gi11321561	vDGALcMEk	1	1	HCD	N-Term(iTRAQ4plex), C6(Methylthio), K9(iTRAQ4plex)	46.1574	3.96776	1	1	8601	Unique	Used	1.76947	2	650.322	1299.64	0.624395	33.3215	3375	3375	MS2	16/16	Plasma_iTRAQ_6_8.raw
																gi11321561	vDGALcMEk	1	1	HCD	N-Term(iTRAQ4plex), C6(Methylthio), K9(iTRAQ4plex)	31.814	3.96599	1	1	8362	Unique	Used	1.72759	2	650.321	1299.63	-0.502724	31.1443	3120	3120	MS2	16/16	Plasma_iTRAQ_6_8.raw
																gi11321561	vDGALcMEk	1	1	HCD	N-Term(iTRAQ4plex), C6(Methylthio), K9(iTRAQ4plex)	39.5458	3.9645	1	1	6091	Unique	Used	1.78501	2	650.321	1299.64	0.154762	8.55546	698	698	MS2	16/16	Plasma_iTRAQ_6_8.raw
																gi11321561	vDGALcMEk	1	1	HCD	N-Term(iTRAQ4plex), C6(Methylthio), K9(iTRAQ4plex)	41.6626	3.9626	1	1	6684	Unique	Used	1.80731	2	650.322	1299.64	1.09403	16.0225	1331	1331	MS2	16/16	Plasma_iTRAQ_6_8.raw
																gi11321561	vDGALcMEk	1	1	HCD	N-Term(iTRAQ4plex), C6(Methylthio), K9(iTRAQ4plex)	30.2251	3.96236	1	1	7600	Unique	Used	1.81014	2	650.322	1299.64	1.56366	24.2341	2308	2308	MS2	16/16	Plasma_iTRAQ_6_8.raw
																gi11321561	vDGALcMEk	1	1	HCD	N-Term(iTRAQ4plex), C6(Methylthio), K9(iTRAQ4plex)	43.0522	3.9598	1	1	6191	Unique	Used	1.72562	2	650.321	1299.64	0.436542	9.85765	805	805	MS2	16/16	Plasma_iTRAQ_6_8.raw
																gi11321561	vDGALcMEk	1	1	HCD	N-Term(iTRAQ4plex), C6(Methylthio), K9(iTRAQ4plex)	41.7345	3.95935	1	1	7491	Unique	Used	1.76587	2	650.321	1299.64	0.154762	23.3197	2191	2191	MS2	16/16	Plasma_iTRAQ_6_8.raw
																gi11321561	vDGALcMEk	1	1	HCD	N-Term(iTRAQ4plex), C6(Methylthio), K9(iTRAQ4plex)	51.3141	3.95837	1	1	5539	Unique	Used	1.73673	2	650.321	1299.64	0.154762	1.31551	109	109	MS2	16/16	Plasma_iTRAQ_6_8.raw
																gi11321561	vDGALcMEk	1	1	HCD	N-Term(iTRAQ4plex), C6(Methylthio), K9(iTRAQ4plex)	30.5429	3.95687	1	1	12251	Unique	Used	1.56255	2	650.322	1299.64	0.906175	48.4304	3187	3187	MS2	16/16	Plasma_iTRAQ_1_3.raw
																gi11321561	vDGALcMEk	1	1	HCD	N-Term(iTRAQ4plex), C6(Methylthio), K9(iTRAQ4plex)	42.9576	3.95486	1	1	6758	Unique	Used	1.74647	2	650.322	1299.64	0.812248	16.7307	1410	1410	MS2	16/16	Plasma_iTRAQ_6_8.raw
																gi11321561	vDGALcMEk	1	1	HCD	N-Term(iTRAQ4plex), C6(Methylthio), K9(iTRAQ4plex)	45.892	3.95405	1	1	6206	Unique	Used	1.74345	2	650.322	1299.64	1.0001	10.048	821	821	MS2	16/16	Plasma_iTRAQ_6_8.raw
																gi11321561	vDGALcMEk	1	1	HCD	N-Term(iTRAQ4plex), C6(Methylthio), K9(iTRAQ4plex)	44.2081	3.94962	1	1	6017	Unique	Used	1.6611	2	650.321	1299.64	0.342616	7.57807	619	619	MS2	16/16	Plasma_iTRAQ_6_8.raw
																gi11321561	vDGALcMEk	1	1	HCD	N-Term(iTRAQ4plex), C6(Methylthio), K9(iTRAQ4plex)	38.432	3.94943	1	1	5568	Unique	Used	1.66997	2	650.321	1299.64	0.0608358	1.69536	140	140	MS2	16/16	Plasma_iTRAQ_6_8.raw
																gi11321561	vDGALcMEk	1	1	HCD	N-Term(iTRAQ4plex), C6(Methylthio), K9(iTRAQ4plex)	39.5332	3.9458	1	1	7568	Unique	Used	1.68593	2	650.322	1299.64	1.84544	24.0048	2274	2274	MS2	16/16	Plasma_iTRAQ_6_8.raw
																gi11321561	vDGALcMEk	1	1	HCD	N-Term(iTRAQ4plex), C6(Methylthio), K9(iTRAQ4plex)	29.0429	3.9449	1	1	8707	Unique	Used	1.93866	2	650.322	1299.64	1.28188	34.8195	3488	3488	MS2	16/16	Plasma_iTRAQ_6_8.raw
																gi11321561	vDGALcMEk	1	1	HCD	N-Term(iTRAQ4plex), C6(Methylthio), K9(iTRAQ4plex)	38.7893	3.94126	1	1	5601	Unique	Used	1.88396	2	650.321	1299.63	-0.314871	2.13754	175	175	MS2	16/16	Plasma_iTRAQ_6_8.raw
																gi11321561	vDGALcMEk	1	1	HCD	N-Term(iTRAQ4plex), C6(Methylthio), K9(iTRAQ4plex)	45.6075	3.93255	1	1	5795	Unique	Used	1.83572	2	650.321	1299.64	0.154762	4.69055	382	382	MS2	16/16	Plasma_iTRAQ_6_8.raw
																gi11321561	vDGALcMEk	1	1	HCD	N-Term(iTRAQ4plex), C6(Methylthio), K9(iTRAQ4plex)	33.6517	3.93025	1	1	5991	Unique	Used	1.69716	2	650.321	1299.63	-0.127017	7.24227	591	591	MS2	16/16	Plasma_iTRAQ_6_8.raw
																gi11321561	vDGALcMEk	1	1	HCD	N-Term(iTRAQ4plex), C6(Methylthio), K9(iTRAQ4plex)	42.7106	3.92793	1	1	7477	Unique	Used	1.75112	2	650.321	1299.63	-0.220944	23.1828	2176	2176	MS2	16/16	Plasma_iTRAQ_6_8.raw
																gi11321561	vDGALcMEk	1	1	HCD	N-Term(iTRAQ4plex), C6(Methylthio), K9(iTRAQ4plex)	40.8845	3.92178	1	1	7514	Unique	Used	1.90211	2	650.322	1299.64	0.812248	23.5451	2216	2216	MS2	16/16	Plasma_iTRAQ_6_8.raw
																gi11321561	vDGALcMEk	1	1	HCD	N-Term(iTRAQ4plex), C6(Methylthio), K9(iTRAQ4plex)	45.4879	3.92149	1	1	5598	Unique	Used	1.71934	2	650.321	1299.63	-0.314871	2.09341	172	172	MS2	16/16	Plasma_iTRAQ_6_8.raw
																gi11321561	vDGALcMEk	1	1	HCD	N-Term(iTRAQ4plex), C6(Methylthio), K9(iTRAQ4plex)	45.2887	3.92086	1	1	5658	Unique	Used	1.81561	2	650.321	1299.64	0.342616	2.88422	236	236	MS2	16/16	Plasma_iTRAQ_6_8.raw
																gi11321561	vDGALcMEk	1	1	HCD	N-Term(iTRAQ4plex), C6(Methylthio), K9(iTRAQ4plex)	29.5512	3.91955	1	1	5869	Unique	Used	1.71925	2	650.321	1299.64	0.0608358	5.65405	461	461	MS2	16/16	Plasma_iTRAQ_6_8.raw
																gi11321561	vDGALcMEk	1	1	HCD	N-Term(iTRAQ4plex), C6(Methylthio), K9(iTRAQ4plex)	31.3867	3.91719	1	1	5764	Unique	Used	1.67321	2	650.321	1299.63	-0.502724	4.28395	349	349	MS2	16/16	Plasma_iTRAQ_6_8.raw
																gi11321561	vDGALcMEk	1	1	HCD	N-Term(iTRAQ4plex), C6(Methylthio), K9(iTRAQ4plex)	49.3557	3.91026	1	1	5509	Unique	Used	1.62541	2	650.321	1299.64	0.436542	0.922665	77	77	MS2	16/16	Plasma_iTRAQ_6_8.raw
																gi11321561	vDGALcMEk	1	1	HCD	N-Term(iTRAQ4plex), C6(Methylthio), K9(iTRAQ4plex)	42.2828	3.90323	1	1	7502	Unique	Used	1.79823	2	650.322	1299.64	1.0001	23.4283	2203	2203	MS2	16/16	Plasma_iTRAQ_6_8.raw
																gi11321561	vDGALcMEk	1	1	HCD	N-Term(iTRAQ4plex), C6(Methylthio), K9(iTRAQ4plex)	44.0568	3.90217	1	1	8609	Unique	Used	1.79246	2	650.321	1299.63	-0.0330908	33.419	3384	3384	MS2	16/16	Plasma_iTRAQ_6_8.raw
																gi11321561	vDGALcMEk	1	1	HCD	N-Term(iTRAQ4plex), C6(Methylthio), K9(iTRAQ4plex)	51.3146	3.89947	1	1	6221	Unique	Used	1.68061	2	650.321	1299.64	0.530469	10.2324	837	837	MS2	16/16	Plasma_iTRAQ_6_8.raw
																gi11321561	vDGALcMEk	1	1	HCD	N-Term(iTRAQ4plex), C6(Methylthio), K9(iTRAQ4plex)	40.2007	3.89605	1	1	5703	Unique	Used	1.7118	2	650.321	1299.64	0.154762	3.47818	284	284	MS2	16/16	Plasma_iTRAQ_6_8.raw
																gi11321561	vDGALcMEk	1	1	HCD	N-Term(iTRAQ4plex), C6(Methylthio), K9(iTRAQ4plex)	33.1661	3.89224	1	1	5839	Unique	Used	1.71095	2	650.321	1299.63	-0.408797	5.26186	429	429	MS2	16/16	Plasma_iTRAQ_6_8.raw
																gi11321561	vDGALcMEk	1	1	HCD	N-Term(iTRAQ4plex), C6(Methylthio), K9(iTRAQ4plex)	45.7085	3.88775	1	1	6731	Unique	Used	1.74847	2	650.322	1299.64	1.0001	16.4837	1381	1381	MS2	16/16	Plasma_iTRAQ_6_8.raw
																gi11321561	vDGALcMEk	1	1	HCD	N-Term(iTRAQ4plex), C6(Methylthio), K9(iTRAQ4plex)	43.1555	3.88686	1	1	14950	Unique	Used	1.85084	2	650.322	1299.64	1.46973	40.3745	3590	3590	MS2	16/16	Plasma_iTRAQ_4.raw
																gi11321561	vDGALcMEk	1	1	HCD	N-Term(iTRAQ4plex), C6(Methylthio), K9(iTRAQ4plex)	46.0593	3.87731	1	1	6713	Unique	Used	1.62955	2	650.322	1299.64	1.75151	16.3296	1362	1362	MS2	16/16	Plasma_iTRAQ_6_8.raw
																gi11321561	vDGALcMEk	1	1	HCD	N-Term(iTRAQ4plex), C6(Methylthio), K9(iTRAQ4plex)	28.2363	3.87359	1	1	6336	Unique	Used	1.68397	2	650.321	1299.64	0.154762	11.7085	959	959	MS2	16/16	Plasma_iTRAQ_6_8.raw
																gi11321561	vDGALcMEk	1	1	HCD	N-Term(iTRAQ4plex), C6(Methylthio), K9(iTRAQ4plex)	38.8772	3.87325	1	1	6501	Unique	Used	1.70442	2	650.321	1299.63	-0.0330908	13.8416	1135	1135	MS2	16/16	Plasma_iTRAQ_6_8.raw
																gi11321561	vDGALcMEk	1	1	HCD	N-Term(iTRAQ4plex), C6(Methylthio), K9(iTRAQ4plex)	28.591	3.86473	1	1	15185	Unique	Used	1.6466	2	650.321	1299.64	0.342616	42.8996	3848	3848	MS2	16/16	Plasma_iTRAQ_4.raw
																gi11321561	vDGALcMEk	1	1	HCD	N-Term(iTRAQ4plex), C6(Methylthio), K9(iTRAQ4plex)	40.4349	3.86438	1	1	7497	Unique	Used	1.76464	2	650.322	1299.64	1.0001	23.3877	2198	2198	MS2	16/16	Plasma_iTRAQ_6_8.raw
																gi11321561	vDGALcMEk	1	1	HCD	N-Term(iTRAQ4plex), C6(Methylthio), K9(iTRAQ4plex)	47.302	3.86387	1	1	5960	Unique	Used	1.69099	2	650.321	1299.64	0.154762	6.83653	558	558	MS2	16/16	Plasma_iTRAQ_6_8.raw
																gi11321561	vDGALcMEk	1	1	HCD	N-Term(iTRAQ4plex), C6(Methylthio), K9(iTRAQ4plex)	38.7919	3.86381	1	1	5779	Unique	Used	1.69408	2	650.321	1299.64	0.248689	4.48106	365	365	MS2	16/16	Plasma_iTRAQ_6_8.raw
																gi11321561	vDGALcMEk	1	1	HCD	N-Term(iTRAQ4plex), C6(Methylthio), K9(iTRAQ4plex)	42.5686	3.86111	1	1	5587	Unique	Used	1.82125	2	650.321	1299.63	-0.0330908	1.95308	160	160	MS2	16/16	Plasma_iTRAQ_6_8.raw
																gi11321561	vDGALcMEk	1	1	HCD	N-Term(iTRAQ4plex), C6(Methylthio), K9(iTRAQ4plex)	43.7547	3.84365	1	1	7486	Unique	Used	1.74569	2	650.321	1299.64	0.154762	23.2721	2186	2186	MS2	16/16	Plasma_iTRAQ_6_8.raw
																gi11321561	vDGALcMEk	1	1	HCD	N-Term(iTRAQ4plex), C6(Methylthio), K9(iTRAQ4plex)	36.1819	3.83669	1	1	5554	Unique	Used	1.68559	2	650.321	1299.64	0.154762	1.51265	125	125	MS2	16/16	Plasma_iTRAQ_6_8.raw
																gi11321561	vDGALcMEk	1	1	HCD	N-Term(iTRAQ4plex), C6(Methylthio), K9(iTRAQ4plex)	41.1787	3.83209	1	1	7511	Unique	Used	1.76342	2	650.322	1299.64	0.812248	23.5231	2213	2213	MS2	16/16	Plasma_iTRAQ_6_8.raw
																gi11321561	vDGALcMEk	1	1	HCD	N-Term(iTRAQ4plex), C6(Methylthio), K9(iTRAQ4plex)	46.1816	3.83111	1	1	5523	Unique	Used	1.58346	2	650.322	1299.64	0.624395	1.10419	92	92	MS2	16/16	Plasma_iTRAQ_6_8.raw
																gi11321561	vDGALcMEk	1	1	HCD	N-Term(iTRAQ4plex), C6(Methylthio), K9(iTRAQ4plex)	27.4722	3.82807	1	1	10291	Unique	Used	1.49128	2	650.321	1299.64	0.436542	17.6557	1043	1043	MS2	16/16	Plasma_iTRAQ_1_3.raw
																gi11321561	vDGALcMEk	1	1	HCD	N-Term(iTRAQ4plex), C6(Methylthio), K9(iTRAQ4plex)	42.2131	3.82729	1	1	8679	Unique	Used	1.77304	2	650.321	1299.64	0.436542	34.4302	3459	3459	MS2	16/16	Plasma_iTRAQ_6_8.raw
																gi11321561	vDGALcMEk	1	1	HCD	N-Term(iTRAQ4plex), C6(Methylthio), K9(iTRAQ4plex)	43.0448	3.82413	1	1	5675	Unique	Used	1.74265	2	650.321	1299.63	-0.0330908	3.11079	254	254	MS2	16/16	Plasma_iTRAQ_6_8.raw
																gi11321561	vDGALcMEk	1	1	HCD	N-Term(iTRAQ4plex), C6(Methylthio), K9(iTRAQ4plex)	49.9279	3.80579	1	1	7773	Unique	Used	1.75898	2	650.321	1299.63	-0.0330908	25.6005	2492	2492	MS2	16/16	Plasma_iTRAQ_6_8.raw
																gi11321561	vDGALcMEk	1	1	HCD	N-Term(iTRAQ4plex), C6(Methylthio), K9(iTRAQ4plex)	29.8643	3.78911	1	1	7570	Unique	Used	1.91459	2	650.322	1299.64	1.84544	24.0135	2276	2276	MS2	16/16	Plasma_iTRAQ_6_8.raw
																gi11321561	vDGALcMEk	1	1	HCD	N-Term(iTRAQ4plex), C6(Methylthio), K9(iTRAQ4plex)	40.3766	3.78013	1	1	8618	Unique	Used	1.84348	2	650.321	1299.63	-0.220944	33.5408	3394	3394	MS2	16/16	Plasma_iTRAQ_6_8.raw
																gi11321561	vDGALcMEk	1	1	HCD	N-Term(iTRAQ4plex), C6(Methylthio), K9(iTRAQ4plex)	38.3617	3.77592	1	1	6226	Unique	Used	1.85947	2	650.321	1299.64	0.530469	10.2903	842	842	MS2	16/16	Plasma_iTRAQ_6_8.raw
																gi11321561	vDGALcMEk	1	1	HCD	N-Term(iTRAQ4plex), C6(Methylthio), K9(iTRAQ4plex)	26.8715	3.76424	1	1	8612	Unique	Used	1.83827	2	650.321	1299.63	-0.0330908	33.4495	3387	3387	MS2	16/16	Plasma_iTRAQ_6_8.raw
																gi11321561	vDGALcMEk	1	1	HCD	N-Term(iTRAQ4plex), C6(Methylthio), K9(iTRAQ4plex)	33.5071	3.7623	1	1	7622	Unique	Used	1.96128	2	650.322	1299.64	1.09403	24.3874	2331	2331	MS2	16/16	Plasma_iTRAQ_6_8.raw
																gi11321561	vDGALcMEk	1	1	HCD	N-Term(iTRAQ4plex), C6(Methylthio), K9(iTRAQ4plex)	36.8575	3.75237	1	1	8709	Unique	Used	1.78743	2	650.322	1299.64	1.0001	34.8587	3491	3491	MS2	16/16	Plasma_iTRAQ_6_8.raw
																gi11321561	vDGALcMEk	1	1	HCD	N-Term(iTRAQ4plex), C6(Methylthio), K9(iTRAQ4plex)	26.4239	3.74892	1	1	7576	Unique	Used	1.99479	2	650.322	1299.64	1.84544	24.0473	2282	2282	MS2	14/16	Plasma_iTRAQ_6_8.raw
																gi11321561	vDGALcMEk	1	1	HCD	N-Term(iTRAQ4plex), C6(Methylthio), K9(iTRAQ4plex)	23.3463	3.73561	1	1	7895	Unique	Used	1.76008	2	650.322	1299.64	1.65759	26.835	2622	2622	MS2	16/16	Plasma_iTRAQ_6_8.raw
																gi11321561	vDGALcMEk	1	1	HCD	N-Term(iTRAQ4plex), C6(Methylthio), K9(iTRAQ4plex)	47.7403	3.72887	1	1	6095	Unique	Used	1.79244	2	650.321	1299.64	0.154762	8.60734	702	702	MS2	16/16	Plasma_iTRAQ_6_8.raw
																gi11321561	vDGALcMEk	1	1	HCD	N-Term(iTRAQ4plex), C6(Methylthio), K9(iTRAQ4plex)	41.6311	3.72156	1	1	6081	Unique	Used	1.9585	2	650.321	1299.63	-0.0330908	8.42593	687	687	MS2	16/16	Plasma_iTRAQ_6_8.raw
																gi11321561	vDGALcMEk	1	1	HCD	N-Term(iTRAQ4plex), C6(Methylthio), K9(iTRAQ4plex)	31.3463	3.71989	1	1	6736	Unique	Used	2.04839	2	650.322	1299.64	1.0001	16.5158	1386	1386	MS2	16/16	Plasma_iTRAQ_6_8.raw
																gi11321561	vDGALcMEk	1	1	HCD	N-Term(iTRAQ4plex), C6(Methylthio), K9(iTRAQ4plex)	41.9223	3.71314	1	1	5527	Unique	Used	1.82152	2	650.322	1299.64	0.624395	1.16214	96	96	MS2	16/16	Plasma_iTRAQ_6_8.raw
																gi11321561	vDGALcMEk	1	1	HCD	N-Term(iTRAQ4plex), C6(Methylthio), K9(iTRAQ4plex)	40.9762	3.71261	1	1	6771	Unique	Used	1.94817	2	650.322	1299.64	0.812248	16.8399	1423	1423	MS2	16/16	Plasma_iTRAQ_6_8.raw
																gi11321561	vDGALcMEk	1	1	HCD	N-Term(iTRAQ4plex), C6(Methylthio), K9(iTRAQ4plex)	25.5151	3.70899	1	1	8280	Unique	Used	1.80173	2	650.322	1299.64	2.03329	30.3926	3033	3033	MS2	16/16	Plasma_iTRAQ_6_8.raw
																gi11321561	vDGALcMEk	1	1	HCD	N-Term(iTRAQ4plex), C6(Methylthio), K9(iTRAQ4plex)	38.5775	3.70636	1	1	6152	Unique	Used	1.97377	2	650.321	1299.64	0.530469	9.35333	763	763	MS2	16/16	Plasma_iTRAQ_6_8.raw
																gi11321561	vDGALcMEk	1	1	HCD	N-Term(iTRAQ4plex), C6(Methylthio), K9(iTRAQ4plex)	39.1359	3.7054	1	1	6351	Unique	Used	1.70277	2	650.321	1299.64	0.342616	11.9028	975	975	MS2	16/16	Plasma_iTRAQ_6_8.raw
																gi11321561	vDGALcMEk	1	1	HCD	N-Term(iTRAQ4plex), C6(Methylthio), K9(iTRAQ4plex)	39.4606	3.70206	1	1	7926	Unique	Used	1.58441	2	650.321	1299.64	0.436542	27.156	2655	2655	MS2	16/16	Plasma_iTRAQ_6_8.raw
																gi11321561	vDGALcMEk	1	1	HCD	N-Term(iTRAQ4plex), C6(Methylthio), K9(iTRAQ4plex)	39.8551	3.68657	1	1	6818	Unique	Used	1.65882	2	650.322	1299.64	0.624395	17.2997	1474	1474	MS2	16/16	Plasma_iTRAQ_6_8.raw
																gi11321561	vDGALcMEk	1	1	HCD	N-Term(iTRAQ4plex), C6(Methylthio), K9(iTRAQ4plex)	37.7392	3.68559	1	1	7610	Unique	Used	1.90359	2	650.322	1299.64	1.56366	24.2931	2318	2318	MS2	15/16	Plasma_iTRAQ_6_8.raw
																gi11321561	vDGALcMEk	1	1	HCD	N-Term(iTRAQ4plex), C6(Methylthio), K9(iTRAQ4plex)	24.1328	3.6783	1	1	6612	Unique	Used	1.89745	2	650.322	1299.64	0.624395	15.2005	1254	1254	MS2	16/16	Plasma_iTRAQ_6_8.raw
																gi11321561	vDGALcMEk	1	1	HCD	N-Term(iTRAQ4plex), C6(Methylthio), K9(iTRAQ4plex)	34.3398	3.67711	1	1	6597	Unique	Used	1.9367	2	650.322	1299.64	0.812248	15.0218	1238	1238	MS2	16/16	Plasma_iTRAQ_6_8.raw
																gi11321561	vDGALcMEk	1	1	HCD	N-Term(iTRAQ4plex), C6(Methylthio), K9(iTRAQ4plex)	32.2169	3.67606	1	1	6442	Unique	Used	1.7919	2	650.321	1299.63	-0.0330908	13.0875	1072	1072	MS2	16/16	Plasma_iTRAQ_6_8.raw
																gi11321561	vDGALcMEk	1	1	HCD	N-Term(iTRAQ4plex), C6(Methylthio), K9(iTRAQ4plex)	19.5895	3.67033	1	1	8763	Unique	Used	1.63976	2	650.321	1299.63	-0.0330908	35.5935	3548	3548	MS2	16/16	Plasma_iTRAQ_6_8.raw
																gi11321561	vDGALcMEk	1	1	HCD	N-Term(iTRAQ4plex), C6(Methylthio), K9(iTRAQ4plex)	18.8629	3.65977	1	1	7592	Unique	Used	1.87369	2	650.322	1299.64	1.75151	24.1641	2299	2299	MS2	15/16	Plasma_iTRAQ_6_8.raw
																gi11321561	vDGALcMEk	1	1	HCD	N-Term(iTRAQ4plex), C6(Methylthio), K9(iTRAQ4plex)	39.1611	3.65671	1	1	8635	Unique	Used	1.89921	2	650.321	1299.63	-0.127017	33.7667	3412	3412	MS2	16/16	Plasma_iTRAQ_6_8.raw
																gi11321561	vDGALcMEk	1	1	HCD	N-Term(iTRAQ4plex), C6(Methylthio), K9(iTRAQ4plex)	38.0135	3.65563	1	1	7584	Unique	Used	1.90495	2	650.322	1299.64	1.75151	24.1186	2291	2291	MS2	16/16	Plasma_iTRAQ_6_8.raw
																gi11321561	vDGALcMEk	1	1	HCD	N-Term(iTRAQ4plex), C6(Methylthio), K9(iTRAQ4plex)	47.9574	3.65308	1	1	5915	Unique	Used	1.72912	2	650.321	1299.64	0.154762	6.25331	510	510	MS2	16/16	Plasma_iTRAQ_6_8.raw
																gi11321561	vDGALcMEk	1	1	HCD	N-Term(iTRAQ4plex), C6(Methylthio), K9(iTRAQ4plex)	42.8679	3.65228	1	1	8265	Unique	Used	1.78307	2	650.321	1299.64	0.342616	30.239	3017	3017	MS2	16/16	Plasma_iTRAQ_6_8.raw
																gi11321561	vDGALcMEk	1	1	HCD	N-Term(iTRAQ4plex), C6(Methylthio), K9(iTRAQ4plex)	29.4167	3.64754	1	1	6625	Unique	Used	2.01441	2	650.322	1299.64	0.812248	15.3606	1268	1268	MS2	16/16	Plasma_iTRAQ_6_8.raw
																gi11321561	vDGALcMEk	1	1	HCD	N-Term(iTRAQ4plex), C6(Methylthio), K9(iTRAQ4plex)	44.4242	3.64364	1	1	5448	Unique	Used	1.70867	2	650.321	1299.64	0.342616	0.127577	12	12	MS2	16/16	Plasma_iTRAQ_6_8.raw
																gi11321561	vDGALcMEk	1	1	HCD	N-Term(iTRAQ4plex), C6(Methylthio), K9(iTRAQ4plex)	29.753	3.6358	1	1	12236	Unique	Used	1.46439	2	650.322	1299.64	0.718322	66.6236	4410	4410	MS2	15/16	Plasma_iTRAQ_4_6.raw
																gi11321561	vDGALcMEk	1	1	HCD	N-Term(iTRAQ4plex), C6(Methylthio), K9(iTRAQ4plex)	39.8305	3.62553	1	1	8633	Unique	Used	1.75365	2	650.321	1299.63	-0.127017	33.7454	3410	3410	MS2	16/16	Plasma_iTRAQ_6_8.raw
																gi11321561	vDGALcMEk	1	1	HCD	N-Term(iTRAQ4plex), C6(Methylthio), K9(iTRAQ4plex)	44.2538	3.61896	1	1	6820	Unique	Used	1.68394	2	650.322	1299.64	0.624395	17.3125	1476	1476	MS2	16/16	Plasma_iTRAQ_6_8.raw
																gi11321561	vDGALcMEk	1	1	HCD	N-Term(iTRAQ4plex), C6(Methylthio), K9(iTRAQ4plex)	39.6533	3.61643	1	1	12419	Unique	Used	1.41371	2	650.321	1299.63	-0.502724	51.0364	3371	3371	MS2	16/16	Plasma_iTRAQ_1_3.raw
																gi11321561	vDGALcMEk	1	1	HCD	N-Term(iTRAQ4plex), C6(Methylthio), K9(iTRAQ4plex)	31.075	3.59872	1	1	8781	Unique	Used	1.73996	2	650.32	1299.63	-1.06628	35.8375	3567	3567	MS2	16/16	Plasma_iTRAQ_6_8.raw
																gi11321561	vDGALcMEk	1	1	HCD	N-Term(iTRAQ4plex), C6(Methylthio), K9(iTRAQ4plex)	45.9422	3.58119	1	1	6759	Unique	Used	1.81171	2	650.322	1299.64	0.812248	16.7345	1411	1411	MS2	16/16	Plasma_iTRAQ_6_8.raw
																gi11321561	vDGALcMEk	1	1	HCD	N-Term(iTRAQ4plex), C6(Methylthio), K9(iTRAQ4plex)	35.9905	3.57404	1	1	8114	Unique	Used	1.73807	2	650.322	1299.64	0.812248	28.9019	2856	2856	MS2	16/16	Plasma_iTRAQ_6_8.raw
																gi11321561	vDGALcMEk	1	1	HCD	N-Term(iTRAQ4plex), C6(Methylthio), K9(iTRAQ4plex)	41.4569	3.56909	1	1	8663	Unique	Used	1.74385	2	650.322	1299.64	0.812248	34.1982	3442	3442	MS2	16/16	Plasma_iTRAQ_6_8.raw
																gi11321561	vDGALcMEk	1	1	HCD	N-Term(iTRAQ4plex), C6(Methylthio), K9(iTRAQ4plex)	30.7473	3.56341	1	1	6427	Unique	Used	1.78629	2	650.321	1299.63	-0.596651	12.8932	1056	1056	MS2	16/16	Plasma_iTRAQ_6_8.raw
																gi11321561	vDGALcMEk	1	1	HCD	N-Term(iTRAQ4plex), C6(Methylthio), K9(iTRAQ4plex)	30.8232	3.5576	1	1	8136	Unique	Used	1.56882	2	650.322	1299.64	0.718322	29.1084	2879	2879	MS2	16/16	Plasma_iTRAQ_6_8.raw
																gi11321561	vDGALcMEk	1	1	HCD	N-Term(iTRAQ4plex), C6(Methylthio), K9(iTRAQ4plex)	27.7436	3.55665	1	1	8122	Unique	Used	1.60469	2	650.322	1299.64	0.812248	28.9866	2864	2864	MS2	16/16	Plasma_iTRAQ_6_8.raw
																gi11321561	vDGALcMEk	1	1	HCD	N-Term(iTRAQ4plex), C6(Methylthio), K9(iTRAQ4plex)	42.9095	3.54319	1	1	5584	Unique	Used	1.72505	2	650.321	1299.63	-0.0330908	1.90947	157	157	MS2	16/16	Plasma_iTRAQ_6_8.raw
																gi11321561	vDGALcMEk	1	1	HCD	N-Term(iTRAQ4plex), C6(Methylthio), K9(iTRAQ4plex)	46.0004	3.53395	1	1	7786	Unique	Used	1.8005	2	650.321	1299.63	-0.0330908	25.7332	2506	2506	MS2	16/16	Plasma_iTRAQ_6_8.raw
																gi11321561	vDGALcMEk	1	1	HCD	N-Term(iTRAQ4plex), C6(Methylthio), K9(iTRAQ4plex)	38.7206	3.52825	1	1	5975	Unique	Used	1.64445	2	650.321	1299.64	0.342616	7.03084	574	574	MS2	16/16	Plasma_iTRAQ_6_8.raw
																gi11321561	vDGALcMEk	1	1	HCD	N-Term(iTRAQ4plex), C6(Methylthio), K9(iTRAQ4plex)	39.3195	3.51788	1	1	6866	Unique	Used	1.62545	2	650.321	1299.64	0.154762	17.8067	1525	1525	MS2	16/16	Plasma_iTRAQ_6_8.raw
																gi11321561	vDGALcMEk	1	1	HCD	N-Term(iTRAQ4plex), C6(Methylthio), K9(iTRAQ4plex)	46.0389	3.51464	1	1	7857	Unique	Used	1.71385	2	650.321	1299.63	-0.0330908	26.4661	2582	2582	MS2	16/16	Plasma_iTRAQ_6_8.raw
																gi11321561	vDGALcMEk	1	1	HCD	N-Term(iTRAQ4plex), C6(Methylthio), K9(iTRAQ4plex)	22.6886	3.51013	1	1	7057	Unique	Used	1.15382	2	650.321	1299.64	0.342616	19.5562	1728	1728	MS2	16/16	Plasma_iTRAQ_6_8.raw
																gi11321561	vDGALcMEk	1	1	HCD	N-Term(iTRAQ4plex), C6(Methylthio), K9(iTRAQ4plex)	49.9548	3.47795	1	1	6579	Unique	Used	1.7279	2	650.322	1299.64	0.906175	14.8164	1219	1219	MS2	16/16	Plasma_iTRAQ_6_8.raw
																gi11321561	vDGALcMEk	1	1	HCD	N-Term(iTRAQ4plex), C6(Methylthio), K9(iTRAQ4plex)	26.2177	3.43311	1	1	10209	Unique	Used	1.31333	2	650.32	1299.63	-1.91163	16.4048	952	952	MS2	14/16	Plasma_iTRAQ_1_3.raw
																gi11321561	vDGALcMEk	1	1	HCD	N-Term(iTRAQ4plex), C6(Methylthio), K9(iTRAQ4plex)	21.6671	3.42836	1	1	10376	Unique	Used	1.49199	2	650.321	1299.64	0.0608358	18.9387	1135	1135	MS2	14/16	Plasma_iTRAQ_1_3.raw
																gi11321561	vDGALcmEk	1	1	HCD	N-Term(iTRAQ4plex), C6(Methylthio), M7(Oxidation), K9(iTRAQ4plex)	18.9509	3.41349	1	1	7274	Unique	Used	1.67972	3	439.216	1315.63	2.08244	21.5392	1960	1960	MS2	13/32	Plasma_iTRAQ_6_8.raw
																gi11321561	vDGALcMEk	1	1	HCD	N-Term(iTRAQ4plex), C6(Methylthio), K9(iTRAQ4plex)	41.9357	3.38989	1	1	18903	Unique	Used	1.42785	2	650.322	1299.64	1.0001	90.1814	8028	8028	MS2	15/16	Plasma_iTRAQ_4.raw
																gi11321561	vDGALcMEk	1	1	HCD	N-Term(iTRAQ4plex), C6(Methylthio), K9(iTRAQ4plex)	31.3548	3.38237	1	1	12643	Unique	Used	1.52777	2	650.322	1299.64	1.18795	17.5472	996	996	MS2	15/16	Plasma_iTRAQ_5.raw
																gi11321561	vDGALcmEk	1	1	HCD	N-Term(iTRAQ4plex), C6(Methylthio), M7(Oxidation), K9(iTRAQ4plex)	25.8956	3.23497	1	1	7271	Unique	Used	1.74675	3	439.216	1315.63	2.08244	21.5212	1957	1957	MS2	13/32	Plasma_iTRAQ_6_8.raw
																gi11321561	vDGALcMEk	1	1	HCD	N-Term(iTRAQ4plex), C6(Methylthio), K9(iTRAQ4plex)	31.0808	3.1608	1	1	6277	Unique	Used	1.6982	2	650.321	1299.63	-0.314871	10.9367	896	896	MS2	16/16	Plasma_iTRAQ_6_8.raw
																gi11321561	vDGALcmEk	1	1	HCD	N-Term(iTRAQ4plex), C6(Methylthio), M7(Oxidation), K9(iTRAQ4plex)	6.42045	3.13199	1	1	7273	Unique	Used	1.86038	2	658.32	1315.63	2.25504	21.5331	1959	1959	MS2	14/16	Plasma_iTRAQ_6_8.raw
																gi11321561	vDGALcmEk	1	1	HCD	N-Term(iTRAQ4plex), C6(Methylthio), M7(Oxidation), K9(iTRAQ4plex)	7.17576	3.09771	1	1	7258	Unique	Used	1.85023	2	658.32	1315.63	1.97668	21.4021	1943	1943	MS2	13/16	Plasma_iTRAQ_6_8.raw
																gi11321561	vDGALcmEk	1	1	HCD	N-Term(iTRAQ4plex), C6(Methylthio), M7(Oxidation), K9(iTRAQ4plex)	22.3987	3.07237	1	1	7279	Unique	Used	1.61011	3	439.216	1315.63	2.08244	21.576	1965	1965	MS2	13/32	Plasma_iTRAQ_6_8.raw
																gi11321561	vDGALcmEk	1	1	HCD	N-Term(iTRAQ4plex), C6(Methylthio), M7(Oxidation), K9(iTRAQ4plex)	15.7199	3.05257	1	1	7288	Unique	Used	1.64917	2	658.319	1315.63	1.32719	21.6565	1975	1975	MS2	13/16	Plasma_iTRAQ_6_8.raw
																gi11321561	vDGALcmEk	1	1	HCD	N-Term(iTRAQ4plex), C6(Methylthio), M7(Oxidation), K9(iTRAQ4plex)	23.4761	3.04698	1	1	7284	Unique	Used	1.76751	2	658.319	1315.63	1.32719	21.6321	1971	1971	MS2	14/16	Plasma_iTRAQ_6_8.raw
																gi11321561	vDGALcmEk	1	1	HCD	N-Term(iTRAQ4plex), C6(Methylthio), M7(Oxidation), K9(iTRAQ4plex)	9.332	2.9212	1	1	7282	Unique	Used	1.87554	2	658.32	1315.63	2.25504	21.5986	1968	1968	MS2	11/16	Plasma_iTRAQ_6_8.raw
																gi11321561	vDGALcmEk	1	1	HCD	N-Term(iTRAQ4plex), C6(Methylthio), M7(Oxidation), K9(iTRAQ4plex)	13.2872	2.91102	1	1	6648	Unique	Used	1.48243	2	658.318	1315.63	-0.89964	15.6173	1292	1292	MS2	13/16	Plasma_iTRAQ_6_8.raw
																gi11321561	vDGALcmEk	1	1	HCD	N-Term(iTRAQ4plex), C6(Methylthio), M7(Oxidation), K9(iTRAQ4plex)	19.4052	2.87939	1	1	6664	Unique	Used	1.44784	2	658.318	1315.63	-0.89964	15.8049	1309	1309	MS2	14/16	Plasma_iTRAQ_6_8.raw
																gi11321561	vDGALcmEk	1	1	HCD	N-Term(iTRAQ4plex), C6(Methylthio), M7(Oxidation), K9(iTRAQ4plex)	9.09513	2.87216	1	1	7255	Unique	Used	1.68678	2	658.32	1315.63	1.97668	21.3817	1940	1940	MS2	15/16	Plasma_iTRAQ_6_8.raw
																gi11321561	vDGALcmEk	1	1	HCD	N-Term(iTRAQ4plex), C6(Methylthio), M7(Oxidation), K9(iTRAQ4plex)	17.8057	2.85663	1	1	6622	Unique	Used	1.50147	2	658.318	1315.63	-0.71407	15.3147	1264	1264	MS2	14/16	Plasma_iTRAQ_6_8.raw
																gi11321561	vWVYPPEk	1	1	HCD	N-Term(iTRAQ4plex), K8(iTRAQ4plex)	6.59194	3.22996	1	1	7520	Unique	Used	1.88728	3	435.92	1305.74	-0.269582	23.5958	2222	2222	MS2	10/28	Plasma_iTRAQ_6_8.raw
																gi11321561	vWVYPPEk	1	1	HCD	N-Term(iTRAQ4plex), K8(iTRAQ4plex)	13.0823	3.20472	1	1	7699	Unique	Used	1.95931	2	653.376	1305.75	0.839189	25.0047	2413	2413	MS2	11/14	Plasma_iTRAQ_6_8.raw
																gi11321561	vWVYPPEk	1	1	HCD	N-Term(iTRAQ4plex), K8(iTRAQ4plex)	14.5964	3.18811	1	1	7624	Unique	Used	1.80272	2	653.376	1305.75	0.652215	24.4008	2333	2333	MS2	11/14	Plasma_iTRAQ_6_8.raw
																gi11321561	vWVYPPEk	1	1	HCD	N-Term(iTRAQ4plex), K8(iTRAQ4plex)	24.7744	3.17059	1	1	8660	Unique	Used	1.93001	2	653.377	1305.75	2.14801	34.1352	3438	3438	MS2	11/14	Plasma_iTRAQ_6_8.raw
																gi11321561	vWVYPPEk	1	1	HCD	N-Term(iTRAQ4plex), K8(iTRAQ4plex)	16.2054	3.16403	1	1	7609	Unique	Used	1.81352	2	653.376	1305.75	0.465241	24.2865	2317	2317	MS2	11/14	Plasma_iTRAQ_6_8.raw
																gi11321561	vWVYPPEk	1	1	HCD	N-Term(iTRAQ4plex), K8(iTRAQ4plex)	24.3828	3.1628	1	1	7531	Unique	Used	1.87022	3	435.92	1305.75	0.361456	23.6898	2234	2234	MS2	11/28	Plasma_iTRAQ_6_8.raw
																gi11321561	vWVYPPEk	1	1	HCD	N-Term(iTRAQ4plex), K8(iTRAQ4plex)	14.6859	3.15764	1	1	7528	Unique	Used	2.06515	2	653.377	1305.75	1.30662	23.6706	2231	2231	MS2	11/14	Plasma_iTRAQ_6_8.raw
																gi11321561	vWVYPPEk	1	1	HCD	N-Term(iTRAQ4plex), K8(iTRAQ4plex)	23.6528	3.14532	1	1	6574	Unique	Used	1.84378	2	653.375	1305.74	-0.843579	14.7461	1213	1213	MS2	11/14	Plasma_iTRAQ_6_8.raw
																gi11321561	vWVYPPEk	1	1	HCD	N-Term(iTRAQ4plex), K8(iTRAQ4plex)	14.6069	3.14402	1	1	7714	Unique	Used	1.95845	2	653.376	1305.75	0.839189	25.1234	2429	2429	MS2	11/14	Plasma_iTRAQ_6_8.raw
																gi11321561	vWVYPPEk	1	1	HCD	N-Term(iTRAQ4plex), K8(iTRAQ4plex)	15.179	3.14094	1	1	6704	Unique	Used	1.98454	2	653.376	1305.74	0.0912927	16.2145	1352	1352	MS2	11/14	Plasma_iTRAQ_6_8.raw
																gi11321561	vWVYPPEk	1	1	HCD	N-Term(iTRAQ4plex), K8(iTRAQ4plex)	9.95479	3.13938	1	1	6545	Unique	Used	1.87753	2	653.376	1305.74	-0.189169	14.3928	1182	1182	MS2	11/14	Plasma_iTRAQ_6_8.raw
																gi11321561	vWVYPPEk	1	1	HCD	N-Term(iTRAQ4plex), K8(iTRAQ4plex)	11.4734	3.12454	1	1	7639	Unique	Used	1.9142	2	653.376	1305.75	0.839189	24.5204	2349	2349	MS2	11/14	Plasma_iTRAQ_6_8.raw
																gi11321561	vWVYPPEk	1	1	HCD	N-Term(iTRAQ4plex), K8(iTRAQ4plex)	12.3747	3.12242	1	1	6619	Unique	Used	1.90639	2	653.376	1305.74	0.18478	15.2817	1261	1261	MS2	11/14	Plasma_iTRAQ_6_8.raw
																gi11321561	vWVYPPEk	1	1	HCD	N-Term(iTRAQ4plex), K8(iTRAQ4plex)	18.5244	3.12223	1	1	6561	Unique	Used	1.90159	2	653.376	1305.74	-0.0956815	14.5887	1199	1199	MS2	11/14	Plasma_iTRAQ_6_8.raw
																gi11321561	vWVYPPEk	1	1	HCD	N-Term(iTRAQ4plex), K8(iTRAQ4plex)	11.7572	3.12042	1	1	6760	Unique	Used	1.86702	2	653.376	1305.75	0.558728	16.7407	1412	1412	MS2	11/14	Plasma_iTRAQ_6_8.raw
																gi11321561	vWVYPPEk	1	1	HCD	N-Term(iTRAQ4plex), K8(iTRAQ4plex)	12.4983	3.11986	1	1	7653	Unique	Used	1.89737	2	653.376	1305.74	0.278267	24.6297	2364	2364	MS2	11/14	Plasma_iTRAQ_6_8.raw
																gi11321561	vWVYPPEk	1	1	HCD	N-Term(iTRAQ4plex), K8(iTRAQ4plex)	12.9913	3.11911	1	1	7518	Unique	Used	1.93502	2	653.377	1305.75	1.02616	23.5788	2220	2220	MS2	11/14	Plasma_iTRAQ_6_8.raw
																gi11321561	vWVYPPEk	1	1	HCD	N-Term(iTRAQ4plex), K8(iTRAQ4plex)	14.4969	3.11443	1	1	7634	Unique	Used	1.9109	2	653.376	1305.75	0.839189	24.4856	2344	2344	MS2	11/14	Plasma_iTRAQ_6_8.raw
																gi11321561	vWVYPPEk	1	1	HCD	N-Term(iTRAQ4plex), K8(iTRAQ4plex)	13.1818	3.11434	1	1	7611	Unique	Used	1.90891	2	653.376	1305.75	0.465241	24.2991	2319	2319	MS2	11/14	Plasma_iTRAQ_6_8.raw
																gi11321561	vWVYPPEk	1	1	HCD	N-Term(iTRAQ4plex), K8(iTRAQ4plex)	12.6137	3.11078	1	1	7509	Unique	Used	1.89924	2	653.377	1305.75	1.02616	23.5097	2211	2211	MS2	11/14	Plasma_iTRAQ_6_8.raw
																gi11321561	vWVYPPEk	1	1	HCD	N-Term(iTRAQ4plex), K8(iTRAQ4plex)	12.1648	3.10889	1	1	7540	Unique	Used	1.78262	2	653.377	1305.75	1.02616	23.7918	2244	2244	MS2	11/14	Plasma_iTRAQ_6_8.raw
																gi11321561	vWVYPPEk	1	1	HCD	N-Term(iTRAQ4plex), K8(iTRAQ4plex)	14.2098	3.1022	1	1	7620	Unique	Used	1.71898	2	653.376	1305.75	0.652215	24.3737	2329	2329	MS2	11/14	Plasma_iTRAQ_6_8.raw
																gi11321561	vWVYPPEk	1	1	HCD	N-Term(iTRAQ4plex), K8(iTRAQ4plex)	11.7181	3.10106	1	1	7526	Unique	Used	1.95094	2	653.377	1305.75	1.30662	23.6571	2229	2229	MS2	11/14	Plasma_iTRAQ_6_8.raw
																gi11321561	vWVYPPEk	1	1	HCD	N-Term(iTRAQ4plex), K8(iTRAQ4plex)	12.8532	3.10051	1	1	6716	Unique	Used	1.84295	2	653.377	1305.75	1.11965	16.3456	1365	1365	MS2	11/14	Plasma_iTRAQ_6_8.raw
																gi11321561	vWVYPPEk	1	1	HCD	N-Term(iTRAQ4plex), K8(iTRAQ4plex)	17.2028	3.10044	1	1	8704	Unique	Used	1.74011	2	653.376	1305.75	0.839189	34.7815	3485	3485	MS2	11/14	Plasma_iTRAQ_6_8.raw
																gi11321561	vWVYPPEk	1	1	HCD	N-Term(iTRAQ4plex), K8(iTRAQ4plex)	13.1812	3.0987	1	1	6643	Unique	Used	1.92013	2	653.376	1305.74	-0.00219439	15.5659	1287	1287	MS2	11/14	Plasma_iTRAQ_6_8.raw
																gi11321561	vWVYPPEk	1	1	HCD	N-Term(iTRAQ4plex), K8(iTRAQ4plex)	10.3711	3.09799	1	1	7578	Unique	Used	1.95035	2	653.377	1305.75	1.21314	24.0591	2284	2284	MS2	11/14	Plasma_iTRAQ_6_8.raw
																gi11321561	vWVYPPEk	1	1	HCD	N-Term(iTRAQ4plex), K8(iTRAQ4plex)	14.1975	3.09743	1	1	6699	Unique	Used	1.93883	2	653.376	1305.74	0.0912927	16.1664	1347	1347	MS2	11/14	Plasma_iTRAQ_6_8.raw
																gi11321561	vWVYPPEk	1	1	HCD	N-Term(iTRAQ4plex), K8(iTRAQ4plex)	11.4049	3.09601	1	1	6679	Unique	Used	1.85925	2	653.376	1305.74	-0.00219439	15.9563	1325	1325	MS2	11/14	Plasma_iTRAQ_6_8.raw
																gi11321561	vWVYPPEk	1	1	HCD	N-Term(iTRAQ4plex), K8(iTRAQ4plex)	17.4051	3.0942	1	1	7656	Unique	Used	1.99237	2	653.376	1305.74	0.278267	24.649	2367	2367	MS2	11/14	Plasma_iTRAQ_6_8.raw
																gi11321561	vWVYPPEk	1	1	HCD	N-Term(iTRAQ4plex), K8(iTRAQ4plex)	11.8146	3.093	1	1	15131	Unique	Used	1.74835	2	653.376	1305.75	0.839189	42.3581	3790	3790	MS2	11/14	Plasma_iTRAQ_4.raw
																gi11321561	vWVYPPEk	1	1	HCD	N-Term(iTRAQ4plex), K8(iTRAQ4plex)	14.8956	3.09287	1	1	6732	Unique	Used	1.72769	2	653.376	1305.74	0.18478	16.4896	1382	1382	MS2	11/14	Plasma_iTRAQ_6_8.raw
																gi11321561	vWVYPPEk	1	1	HCD	N-Term(iTRAQ4plex), K8(iTRAQ4plex)	2.6809	3.09262	1	1	7500	Unique	Used	1.92478	2	653.376	1305.74	-0.46963	23.4114	2201	2201	MS2	11/14	Plasma_iTRAQ_6_8.raw
																gi11321561	vWVYPPEk	1	1	HCD	N-Term(iTRAQ4plex), K8(iTRAQ4plex)	11.0056	3.08926	1	1	7597	Unique	Used	1.98356	2	653.376	1305.74	0.278267	24.195	2304	2304	MS2	11/14	Plasma_iTRAQ_6_8.raw
																gi11321561	vWVYPPEk	1	1	HCD	N-Term(iTRAQ4plex), K8(iTRAQ4plex)	16.6944	3.08609	1	1	7684	Unique	Used	1.93222	2	653.376	1305.75	0.839189	24.883	2397	2397	MS2	11/14	Plasma_iTRAQ_6_8.raw
																gi11321561	vWVYPPEk	1	1	HCD	N-Term(iTRAQ4plex), K8(iTRAQ4plex)	11.531	3.08596	1	1	7508	Unique	Used	1.83125	2	653.377	1305.75	1.02616	23.5057	2210	2210	MS2	11/14	Plasma_iTRAQ_6_8.raw
																gi11321561	vWVYPPEk	1	1	HCD	N-Term(iTRAQ4plex), K8(iTRAQ4plex)	16.5675	3.08596	1	1	6717	Unique	Used	1.9502	2	653.377	1305.75	1.11965	16.3523	1366	1366	MS2	11/14	Plasma_iTRAQ_6_8.raw
																gi11321561	vWVYPPEk	1	1	HCD	N-Term(iTRAQ4plex), K8(iTRAQ4plex)	10.2963	3.08524	1	1	6765	Unique	Used	1.89705	2	653.376	1305.75	0.558728	16.7858	1417	1417	MS2	11/14	Plasma_iTRAQ_6_8.raw
																gi11321561	vWVYPPEk	1	1	HCD	N-Term(iTRAQ4plex), K8(iTRAQ4plex)	16.4066	3.08178	1	1	6747	Unique	Used	1.86294	2	653.376	1305.74	-0.0956815	16.6205	1398	1398	MS2	11/14	Plasma_iTRAQ_6_8.raw
																gi11321561	vWVYPPEk	1	1	HCD	N-Term(iTRAQ4plex), K8(iTRAQ4plex)	13.7701	3.08041	1	1	8645	Unique	Used	1.75683	2	653.376	1305.75	0.652215	33.9086	3422	3422	MS2	11/14	Plasma_iTRAQ_6_8.raw
																gi11321561	vWVYPPEk	1	1	HCD	N-Term(iTRAQ4plex), K8(iTRAQ4plex)	23.7841	3.07782	1	1	8667	Unique	Used	1.74397	2	653.376	1305.74	-0.563117	34.242	3446	3446	MS2	11/14	Plasma_iTRAQ_6_8.raw
																gi11321561	vWVYPPEk	1	1	HCD	N-Term(iTRAQ4plex), K8(iTRAQ4plex)	13.644	3.07772	1	1	6673	Unique	Used	1.91154	2	653.376	1305.74	-0.00219439	15.9003	1319	1319	MS2	11/14	Plasma_iTRAQ_6_8.raw
																gi11321561	vWVYPPEk	1	1	HCD	N-Term(iTRAQ4plex), K8(iTRAQ4plex)	15.2225	3.07564	1	1	7525	Unique	Used	1.88826	2	653.377	1305.75	1.30662	23.6512	2228	2228	MS2	11/14	Plasma_iTRAQ_6_8.raw
																gi11321561	vWVYPPEk	1	1	HCD	N-Term(iTRAQ4plex), K8(iTRAQ4plex)	33.3903	3.07517	1	1	7534	Unique	Used	1.91478	3	435.92	1305.75	0.361456	23.7177	2237	2237	MS2	12/28	Plasma_iTRAQ_6_8.raw
																gi11321561	vWVYPPEk	1	1	HCD	N-Term(iTRAQ4plex), K8(iTRAQ4plex)	15.1004	3.07304	1	1	7559	Unique	Used	1.91451	2	653.377	1305.75	0.932676	23.9261	2264	2264	MS2	11/14	Plasma_iTRAQ_6_8.raw
																gi11321561	vWVYPPEk	1	1	HCD	N-Term(iTRAQ4plex), K8(iTRAQ4plex)	12.8092	3.07059	1	1	6630	Unique	Used	1.96621	2	653.376	1305.74	0.18478	15.4116	1273	1273	MS2	11/14	Plasma_iTRAQ_6_8.raw
																gi11321561	vWVYPPEk	1	1	HCD	N-Term(iTRAQ4plex), K8(iTRAQ4plex)	17.9773	3.06902	1	1	6654	Unique	Used	1.82767	2	653.376	1305.74	-0.00219439	15.7114	1299	1299	MS2	11/14	Plasma_iTRAQ_6_8.raw
																gi11321561	vWVYPPEk	1	1	HCD	N-Term(iTRAQ4plex), K8(iTRAQ4plex)	11.9903	3.06549	1	1	7551	Unique	Used	2.11496	2	653.377	1305.75	1.02616	23.8577	2255	2255	MS2	11/14	Plasma_iTRAQ_6_8.raw
																gi11321561	vWVYPPEk	1	1	HCD	N-Term(iTRAQ4plex), K8(iTRAQ4plex)	18.4978	3.0645	1	1	8705	Unique	Used	1.88467	2	653.376	1305.75	0.839189	34.796	3486	3486	MS2	11/14	Plasma_iTRAQ_6_8.raw
																gi11321561	vWVYPPEk	1	1	HCD	N-Term(iTRAQ4plex), K8(iTRAQ4plex)	13.4809	3.06242	1	1	7693	Unique	Used	1.898	2	653.376	1305.75	0.839189	24.9627	2407	2407	MS2	11/14	Plasma_iTRAQ_6_8.raw
																gi11321561	vWVYPPEk	1	1	HCD	N-Term(iTRAQ4plex), K8(iTRAQ4plex)	16.8103	3.05928	1	1	7678	Unique	Used	1.82447	2	653.376	1305.75	0.839189	24.8448	2391	2391	MS2	11/14	Plasma_iTRAQ_6_8.raw
																gi11321561	vWVYPPEk	1	1	HCD	N-Term(iTRAQ4plex), K8(iTRAQ4plex)	13.4576	3.05853	1	1	7558	Unique	Used	1.95968	2	653.377	1305.75	0.932676	23.9203	2263	2263	MS2	11/14	Plasma_iTRAQ_6_8.raw
																gi11321561	vWVYPPEk	1	1	HCD	N-Term(iTRAQ4plex), K8(iTRAQ4plex)	10.5217	3.05622	1	1	6607	Unique	Used	1.87156	2	653.376	1305.74	-0.00219439	15.1356	1248	1248	MS2	11/14	Plasma_iTRAQ_6_8.raw
																gi11321561	vWVYPPEk	1	1	HCD	N-Term(iTRAQ4plex), K8(iTRAQ4plex)	24.0418	3.05396	1	1	8675	Unique	Used	2.02134	2	653.376	1305.74	-0.563117	34.3591	3454	3454	MS2	11/14	Plasma_iTRAQ_6_8.raw
																gi11321561	vWVYPPEk	1	1	HCD	N-Term(iTRAQ4plex), K8(iTRAQ4plex)	15.2809	3.05072	1	1	6657	Unique	Used	1.89685	2	653.376	1305.74	-0.00219439	15.7356	1302	1302	MS2	11/14	Plasma_iTRAQ_6_8.raw
																gi11321561	vWVYPPEk	1	1	HCD	N-Term(iTRAQ4plex), K8(iTRAQ4plex)	15.0484	3.05047	1	1	14909	Unique	Used	1.63051	2	653.375	1305.74	-1.03055	40.7965	3544	3544	MS2	11/14	Plasma_iTRAQ_5.raw
																gi11321561	vWVYPPEk	1	1	HCD	N-Term(iTRAQ4plex), K8(iTRAQ4plex)	15.8732	3.04544	1	1	7710	Unique	Used	1.86483	2	653.376	1305.75	0.839189	25.0924	2425	2425	MS2	11/14	Plasma_iTRAQ_6_8.raw
																gi11321561	vWVYPPEk	1	1	HCD	N-Term(iTRAQ4plex), K8(iTRAQ4plex)	14.8918	3.04067	1	1	8720	Unique	Used	1.84218	2	653.376	1305.74	0.278267	35.0067	3502	3502	MS2	11/14	Plasma_iTRAQ_6_8.raw
																gi11321561	vWVYPPEk	1	1	HCD	N-Term(iTRAQ4plex), K8(iTRAQ4plex)	26.7297	3.04058	1	1	7731	Unique	Used	1.84092	2	653.375	1305.74	-0.656605	25.2524	2447	2447	MS2	11/14	Plasma_iTRAQ_6_8.raw
																gi11321561	vWVYPPEk	1	1	HCD	N-Term(iTRAQ4plex), K8(iTRAQ4plex)	16.3047	3.03687	1	1	6232	Unique	Used	1.77042	2	653.376	1305.74	0.278267	10.3617	848	848	MS2	11/14	Plasma_iTRAQ_6_8.raw
																gi11321561	vWVYPPEk	1	1	HCD	N-Term(iTRAQ4plex), K8(iTRAQ4plex)	14.3738	3.02249	1	1	14641	Unique	Used	1.62812	2	653.381	1305.76	8.03763	38.2298	3246	3246	MS2	11/14	Plasma_iTRAQ_5.raw
																gi11321561	vWVYPPEk	1	1	HCD	N-Term(iTRAQ4plex), K8(iTRAQ4plex)	15.8153	3.0091	1	1	7577	Unique	Used	1.76487	2	653.377	1305.75	1.21314	24.0529	2283	2283	MS2	11/14	Plasma_iTRAQ_6_8.raw
																gi11321561	vWVYPPEk	1	1	HCD	N-Term(iTRAQ4plex), K8(iTRAQ4plex)	12.2739	3.00664	1	1	8646	Unique	Used	1.95043	2	653.376	1305.75	0.652215	33.9233	3423	3423	MS2	11/14	Plasma_iTRAQ_6_8.raw
																gi11321561	vWVYPPEk	1	1	HCD	N-Term(iTRAQ4plex), K8(iTRAQ4plex)	14.8103	2.98632	1	1	6646	Unique	Used	1.98552	2	653.376	1305.74	-0.00219439	15.5989	1290	1290	MS2	11/14	Plasma_iTRAQ_6_8.raw
																gi11321561	vWVYPPEk	1	1	HCD	N-Term(iTRAQ4plex), K8(iTRAQ4plex)	26.5344	2.98464	1	1	11861	Unique	Used	1.18235	2	653.381	1305.75	7.28975	32.7122	2535	2535	MS2	11/14	Plasma_iTRAQ_7.raw
																gi11321561	vWVYPPEk	1	1	HCD	N-Term(iTRAQ4plex), K8(iTRAQ4plex)	13.442	2.97428	1	1	6735	Unique	Used	1.90249	2	653.376	1305.74	0.18478	16.5091	1385	1385	MS2	11/14	Plasma_iTRAQ_6_8.raw
																gi11321561	vWVYPPEk	1	1	HCD	N-Term(iTRAQ4plex), K8(iTRAQ4plex)	8.70812	2.93885	1	1	7594	Unique	Used	1.76022	2	653.376	1305.74	0.278267	24.1758	2301	2301	MS2	11/14	Plasma_iTRAQ_6_8.raw
																gi11321561	vWVYPPEk	1	1	HCD	N-Term(iTRAQ4plex), K8(iTRAQ4plex)	12.9423	2.92972	1	1	7543	Unique	Used	1.90549	2	653.377	1305.75	1.02616	23.8088	2247	2247	MS2	11/14	Plasma_iTRAQ_6_8.raw
																gi11321561	vWVYPPEk	1	1	HCD	N-Term(iTRAQ4plex), K8(iTRAQ4plex)	22.666	2.92775	1	1	7726	Unique	Used	1.7009	2	653.375	1305.74	-0.656605	25.2165	2442	2442	MS2	11/14	Plasma_iTRAQ_6_8.raw
																gi11321561	vWVYPPEk	1	1	HCD	N-Term(iTRAQ4plex), K8(iTRAQ4plex)	15.9166	2.91977	1	1	8686	Unique	Used	1.78158	2	653.375	1305.74	-0.656605	34.5248	3466	3466	MS2	11/14	Plasma_iTRAQ_6_8.raw
																gi11321561	vWVYPPEk	1	1	HCD	N-Term(iTRAQ4plex), K8(iTRAQ4plex)	10.7178	2.89974	1	1	8654	Unique	Used	1.79422	2	653.377	1305.75	2.14801	34.0525	3432	3432	MS2	11/14	Plasma_iTRAQ_6_8.raw
																gi11321561	vWVYPPEk	1	1	HCD	N-Term(iTRAQ4plex), K8(iTRAQ4plex)	17.6067	2.89503	1	1	6749	Unique	Used	1.95977	2	653.376	1305.74	-0.0956815	16.6364	1400	1400	MS2	11/14	Plasma_iTRAQ_6_8.raw
																gi11321561	vWVYPPEk	1	1	HCD	N-Term(iTRAQ4plex), K8(iTRAQ4plex)	8.64783	2.88919	1	1	7495	Unique	Used	1.92668	2	653.376	1305.74	-0.46963	23.3733	2196	2196	MS2	11/14	Plasma_iTRAQ_6_8.raw
																gi11321561	vWVYPPEk	1	1	HCD	N-Term(iTRAQ4plex), K8(iTRAQ4plex)	12.2116	2.87034	1	1	8689	Unique	Used	1.80276	2	653.375	1305.74	-0.656605	34.564	3469	3469	MS2	11/14	Plasma_iTRAQ_6_8.raw
																gi11321561	vWVYPPEk	1	1	HCD	N-Term(iTRAQ4plex), K8(iTRAQ4plex)	13.8539	2.85394	1	1	6591	Unique	Used	1.78496	2	653.376	1305.75	0.371754	14.949	1231	1231	MS2	11/14	Plasma_iTRAQ_6_8.raw
																gi11321561	wkNFPSPVDAAFR	1	1	HCD	N-Term(iTRAQ4plex), K2(iTRAQ4plex)	40.1339	5.07025	1	1	13038	Unique	Used	1.4598	3	608.334	1822.99	1.58502	46.307	3968	3968	MS2	23/48	Plasma_iTRAQ_7.raw
																gi11321561	wknFPSPVDAAFR	1	1	HCD	N-Term(iTRAQ4plex), K2(iTRAQ4plex), N3(Deamidated)	54.9425	4.99991	1	1	13341	Unique	Used	1.05683	3	608.659	1823.96	-3.33884	50.2336	4357	4357	MS2	24/48	Plasma_iTRAQ_7.raw
																gi11321561	wkNFPSPVDAAFR	1	1	HCD	N-Term(iTRAQ4plex), K2(iTRAQ4plex)	41.1421	4.80907	1	1	13056	Unique	Used	1.31583	2	911.999	1822.99	3.86908	46.5187	3990	3990	MS2	18/24	Plasma_iTRAQ_7.raw
																gi11321561	wkNFPSPVDAAFR	1	1	HCD	N-Term(iTRAQ4plex), K2(iTRAQ4plex)	47.7694	4.2656	1	1	13151	Unique	Used	0.404477	3	608.331	1822.98	-3.23624	47.776	4113	4113	MS2	24/48	Plasma_iTRAQ_7.raw
																gi11321561	yYcFQGnQFLR	1	1	HCD	N-Term(iTRAQ4plex), Y1(iTRAQ4plex), C3(Methylthio), N7(Deamidated)	37.9934	5.76343	1	1	11830	Unique	Used	1.71128	3	591.948	1773.83	-1.45717	59.973	3941	3941	MS2	18/40	Plasma_iTRAQ_4_6.raw
																gi11321561	yYcFQGNQFLR	1	1	HCD	N-Term(iTRAQ4plex), Y1(iTRAQ4plex), C3(Methylthio)	58.9592	5.29519	1	1	10021	Unique	Used	1.63452	3	591.621	1772.85	0.198619	29.7348	1840	1840	MS2	18/40	Plasma_iTRAQ_4_6.raw
																gi11321561	yYcFQGnQFLR	1	1	HCD	N-Term(iTRAQ4plex), Y1(iTRAQ4plex), C3(Methylthio), N7(Deamidated)	28.2672	5.28555	1	1	15737	Unique	Used	1.7467	3	591.948	1773.83	-1.45717	46.6663	4162	4162	MS2	18/40	Plasma_iTRAQ_6.raw
																gi11321561	yYcFQGnQFLR	1	1	HCD	N-Term(iTRAQ4plex), Y1(iTRAQ4plex), C3(Methylthio), N7(Deamidated)	9.44398	5.20546	1	1	19113	Unique	Used	1.5547	3	591.948	1773.83	-1.66362	89.6257	8262	8262	MS2	17/40	Plasma_iTRAQ_6.raw
																gi11321561	yYcFQGnqFLR	1	1	HCD	N-Term(iTRAQ4plex), Y1(iTRAQ4plex), C3(Methylthio), N7(Deamidated), Q8(Deamidated)	46.6957	5.16118	1	1	16043	Unique	Used	1.82704	3	592.276	1774.81	-1.8731	49.8325	4516	4516	MS2	19/40	Plasma_iTRAQ_6.raw
																gi11321561	yYcFQGnQFLR	1	1	HCD	N-Term(iTRAQ4plex), Y1(iTRAQ4plex), C3(Methylthio), N7(Deamidated)	50.9343	5.12923	1	1	15855	Unique	Used	1.59976	3	591.949	1773.83	-0.941042	47.9024	4299	4299	MS2	20/40	Plasma_iTRAQ_6.raw
																gi11321561	yYcFQGNQFLR	1	1	HCD	N-Term(iTRAQ4plex), Y1(iTRAQ4plex), C3(Methylthio)	59.9197	5.08939	1	1	12884	Unique	Used	1.70719	3	591.627	1772.87	9.28745	76.289	5150	5150	MS2	18/40	Plasma_iTRAQ_4_6.raw
																gi11321561	yYcFQGNQFLR	1	1	HCD	N-Term(iTRAQ4plex), Y1(iTRAQ4plex), C3(Methylthio)	55.8811	5.01321	1	1	12878	Unique	Used	1.88573	3	591.619	1772.84	-3.31302	76.2242	5143	5143	MS2	17/40	Plasma_iTRAQ_4_6.raw
																gi11321561	yYcFQGNQFLR	1	1	HCD	N-Term(iTRAQ4plex), Y1(iTRAQ4plex), C3(Methylthio)	12.6576	5.01063	1	1	9719	Unique	Used	1.56088	3	591.622	1772.85	0.611751	24.3662	1475	1475	MS2	17/40	Plasma_iTRAQ_4_6.raw
																gi11321561	yYcFQGNQFLR	1	1	HCD	N-Term(iTRAQ4plex), Y1(iTRAQ4plex), C3(Methylthio)	5.22985	4.9961	1	1	11918	Unique	Used	1.54137	3	591.62	1772.85	-1.76376	61.4472	4043	4043	MS2	18/40	Plasma_iTRAQ_4_6.raw
																gi11321561	yYcFQGnQFLR	1	1	HCD	N-Term(iTRAQ4plex), C3(Methylthio), N7(Deamidated)	19.1916	4.90721	1	1	13647	Unique	Used	1.83251	2	815.368	1629.73	-1.0834	70.1933	4711	4711	MS2	15/20	Plasma_iTRAQ_1_3.raw
																gi11321561	yYcFQGNQFLR	1	1	HCD	N-Term(iTRAQ4plex), Y1(iTRAQ4plex), C3(Methylthio)	24.1037	4.88447	1	1	12948	Unique	Used	1.71046	3	591.623	1772.85	2.47084	45.0917	3851	3851	MS2	20/40	Plasma_iTRAQ_7.raw
																gi11321561	yYcFQGNQFLR	1	1	HCD	N-Term(iTRAQ4plex), Y1(iTRAQ4plex), C3(Methylthio)	12.4262	4.87811	1	1	9791	Unique	Used	1.69253	3	591.621	1772.85	0.405185	25.715	1566	1566	MS2	19/40	Plasma_iTRAQ_4_6.raw
																gi11321561	yYcFQGNQFLR	1	1	HCD	N-Term(iTRAQ4plex), Y1(iTRAQ4plex), C3(Methylthio)	11.6213	4.86471	1	1	10258	Unique	Used	1.48475	3	591.621	1772.85	-0.00794713	33.6131	2111	2111	MS2	19/40	Plasma_iTRAQ_4_6.raw
																gi11321561	yYcFQGNQFLR	1	1	HCD	N-Term(iTRAQ4plex), Y1(iTRAQ4plex), C3(Methylthio)	11.965	4.86113	1	1	10133	Unique	Used	1.60767	3	591.621	1772.85	-0.524363	31.5342	1967	1967	MS2	19/40	Plasma_iTRAQ_4_6.raw
																gi11321561	yYcFQGNQFLR	1	1	HCD	N-Term(iTRAQ4plex), Y1(iTRAQ4plex), C3(Methylthio)	57.4584	4.80708	1	1	9933	Unique	Used	1.82008	3	591.621	1772.85	-0.627647	28.2904	1740	1740	MS2	19/40	Plasma_iTRAQ_4_6.raw
																gi11321561	yYcFQGnQFLR	1	1	HCD	N-Term(iTRAQ4plex), Y1(iTRAQ4plex), C3(Methylthio), N7(Deamidated)	60.9861	4.79137	1	1	15975	Unique	Used	1.52455	3	591.949	1773.83	-0.21846	49.1627	4439	4439	MS2	23/40	Plasma_iTRAQ_6.raw
																gi11321561	yYcFQGNQFLR	1	1	HCD	N-Term(iTRAQ4plex), Y1(iTRAQ4plex), C3(Methylthio)	60.177	4.78161	1	1	9869	Unique	Used	1.62549	3	591.622	1772.85	0.715035	27.1095	1661	1661	MS2	19/40	Plasma_iTRAQ_4_6.raw
																gi11321561	yYcFQGNQFLR	1	1	HCD	N-Term(iTRAQ4plex), Y1(iTRAQ4plex), C3(Methylthio)	12.7607	4.77584	1	1	12439	Unique	Used	1.32017	3	591.624	1772.86	4.12336	69.7497	4640	4640	MS2	17/40	Plasma_iTRAQ_4_6.raw
																gi11321561	yYcFQGNQFLR	1	1	HCD	N-Term(iTRAQ4plex), Y1(iTRAQ4plex), C3(Methylthio)	5.75083	4.76966	1	1	9656	Unique	Used	1.59947	3	591.621	1772.85	0.095336	23.1856	1395	1395	MS2	18/40	Plasma_iTRAQ_4_6.raw
																gi11321561	yYcFQGNQFLR	1	1	HCD	N-Term(iTRAQ4plex), Y1(iTRAQ4plex), C3(Methylthio)	27.1891	4.76173	1	1	8822	Unique	Used	1.49129	3	591.621	1772.85	-0.11123	51.6979	3686	3686	MS2	19/40	Plasma_iTRAQ_8.raw
																gi11321561	yYcFQGNQFLR	1	1	HCD	N-Term(iTRAQ4plex), Y1(iTRAQ4plex), C3(Methylthio)	23.1475	4.75397	1	1	15689	Unique	Used	1.77704	3	591.622	1772.85	1.5413	46.1811	4107	4107	MS2	21/40	Plasma_iTRAQ_6.raw
																gi11321561	yYcFQGNQFLR	1	1	HCD	N-Term(iTRAQ4plex), Y1(iTRAQ4plex), C3(Methylthio)	22.3291	4.74862	1	1	19173	Unique	Used	1.48478	3	591.622	1772.85	1.33473	90.7977	8340	8340	MS2	18/40	Plasma_iTRAQ_6.raw
																gi11321561	yYcFQGNQFLR	1	1	HCD	N-Term(iTRAQ4plex), Y1(iTRAQ4plex), C3(Methylthio)	15.1048	4.73855	1	1	19112	Unique	Used	1.46726	3	591.622	1772.85	1.64458	89.5913	8260	8260	MS2	18/40	Plasma_iTRAQ_6.raw
																gi11321561	yYcFQGNQFLR	1	1	HCD	N-Term(iTRAQ4plex), Y1(iTRAQ4plex), C3(Methylthio)	55.1563	4.71656	1	1	11732	Unique	Used	1.88132	3	591.621	1772.85	-0.11123	58.4637	3831	3831	MS2	17/40	Plasma_iTRAQ_4_6.raw
																gi11321561	yYcFQGnQFLR	1	1	HCD	N-Term(iTRAQ4plex), C3(Methylthio), N7(Deamidated)	19.4485	4.65294	1	1	13453	Unique	Used	1.75566	2	815.367	1629.73	-2.28184	66.9973	4494	4494	MS2	14/20	Plasma_iTRAQ_1_3.raw
																gi11321561	yYcFQGNQFLR	1	1	HCD	N-Term(iTRAQ4plex), C3(Methylthio)	41.8971	4.57925	1	1	11957	Unique	Used	1.86181	2	814.878	1628.75	1.39363	43.7388	2862	2862	MS2	17/20	Plasma_iTRAQ_1_3.raw
																gi11321561	yYcFQGNQFLR	1	1	HCD	N-Term(iTRAQ4plex), C3(Methylthio)	41.1576	4.55457	1	1	11797	Unique	Used	1.85776	2	814.878	1628.75	1.16879	41.2353	2687	2687	MS2	17/20	Plasma_iTRAQ_1_3.raw
																gi11321561	yYcFQGNQFLR	1	1	HCD	N-Term(iTRAQ4plex), Y1(iTRAQ4plex), C3(Methylthio)	4.90538	4.49691	1	1	10360	Unique	Used	1.41308	3	591.621	1772.85	-0.937497	35.314	2227	2227	MS2	20/40	Plasma_iTRAQ_4_6.raw
																gi11321561	yYcFQGNQFLR	1	1	HCD	N-Term(iTRAQ4plex), Y1(iTRAQ4plex), C3(Methylthio)	7.33769	4.48422	1	1	9366	Unique	Used	1.53648	3	591.621	1772.85	-1.04078	17.9247	1035	1035	MS2	17/40	Plasma_iTRAQ_4_6.raw
																gi11321561	yYcFQGNQFLR	1	1	HCD	N-Term(iTRAQ4plex), Y1(iTRAQ4plex), C3(Methylthio)	15.7505	4.47785	1	1	9594	Unique	Used	1.50804	3	591.621	1772.85	-0.11123	21.9531	1312	1312	MS2	16/40	Plasma_iTRAQ_4_6.raw
																gi11321561	yYcFQGNQFLR	1	1	HCD	N-Term(iTRAQ4plex), Y1(iTRAQ4plex), C3(Methylthio)	11.9908	4.45567	1	1	10446	Unique	Used	1.40135	3	591.622	1772.85	1.02488	36.6828	2322	2322	MS2	19/40	Plasma_iTRAQ_4_6.raw
																gi11321561	yYcFQGNQFLR	1	1	HCD	N-Term(iTRAQ4plex), C3(Methylthio)	44.7113	4.44503	1	1	13630	Unique	Used	1.8267	2	814.878	1628.75	1.31868	69.921	4692	4692	MS2	16/20	Plasma_iTRAQ_1_3.raw
																gi11321561	yYcFQGNQFLR	1	1	HCD	N-Term(iTRAQ4plex), Y1(iTRAQ4plex), C3(Methylthio)	58.2527	4.42988	1	1	15579	Unique	Used	1.58501	3	591.622	1772.85	1.02488	44.9363	3977	3977	MS2	17/40	Plasma_iTRAQ_6.raw
																gi11321561	yYcFQGNQFLR	1	1	HCD	N-Term(iTRAQ4plex), Y1(iTRAQ4plex), C3(Methylthio)	48.2218	4.42316	1	1	12952	Unique	Used	1.55619	2	886.929	1772.85	0.722619	45.113	3855	3855	MS2	17/20	Plasma_iTRAQ_7.raw
																gi11321561	yYcFQGNQFLR	1	1	HCD	N-Term(iTRAQ4plex), C3(Methylthio)	31.1973	4.42011	1	1	11645	Unique	Used	1.78644	2	814.878	1628.75	1.54353	38.8077	2519	2519	MS2	16/20	Plasma_iTRAQ_1_3.raw
																gi11321561	yYcFQGNQFLR	1	1	HCD	N-Term(iTRAQ4plex), Y1(iTRAQ4plex), C3(Methylthio)	13.325	4.35808	1	1	13774	Unique	Used	1.58838	3	591.62	1772.85	-1.76376	90.4463	6197	6197	MS2	19/40	Plasma_iTRAQ_4_6.raw
																gi11321561	yycFQGNQFLR	1	1	HCD	N-Term(iTRAQ4plex), Y2(iTRAQ4plex), C3(Methylthio)	14.8031	4.35533	1	1	15493	Unique	Used	1.81443	2	886.929	1772.85	1.34232	43.877	3872	3872	MS2	17/20	Plasma_iTRAQ_6.raw
																gi11321561	yYcFQGNQFLR	1	1	HCD	N-Term(iTRAQ4plex), C3(Methylthio)	38.046	4.33267	1	1	11875	Unique	Used	1.90201	2	814.878	1628.75	0.794054	42.4674	2773	2773	MS2	18/20	Plasma_iTRAQ_1_3.raw
																gi11321561	yYcFQGNQFLR	1	1	HCD	N-Term(iTRAQ4plex), Y1(iTRAQ4plex), C3(Methylthio)	6.74967	4.31932	1	1	9520	Unique	Used	1.41772	3	591.622	1772.85	0.715035	20.6239	1221	1221	MS2	15/40	Plasma_iTRAQ_4_6.raw
																gi11321561	yYcFQGNQFLR	1	1	HCD	N-Term(iTRAQ4plex), C3(Methylthio)	29.9772	4.31379	1	1	11466	Unique	Used	1.70921	2	814.878	1628.75	1.09384	36.0572	2326	2326	MS2	17/20	Plasma_iTRAQ_1_3.raw
																gi11321561	yYcFQGNQFLR	1	1	HCD	N-Term(iTRAQ4plex), C3(Methylthio)	42.3352	4.31119	1	1	11365	Unique	Used	1.81727	2	814.878	1628.75	1.24374	34.4954	2215	2215	MS2	17/20	Plasma_iTRAQ_1_3.raw
																gi11321561	yYcFQGnQFLR	1	1	HCD	N-Term(iTRAQ4plex), Y1(iTRAQ4plex), C3(Methylthio), N7(Deamidated)	34.3463	4.29487	1	1	13094	Unique	Used	1.1378	3	591.947	1773.83	-4.24429	46.9781	4037	4037	MS2	22/40	Plasma_iTRAQ_7.raw
																gi11321561	yYcFQGNQFLR	1	1	HCD	N-Term(iTRAQ4plex), C3(Methylthio)	31.0989	4.29266	1	1	12116	Unique	Used	1.80357	2	814.878	1628.75	1.09384	46.2755	3039	3039	MS2	17/20	Plasma_iTRAQ_1_3.raw
																gi11321561	yYcFQGNQFLR	1	1	HCD	N-Term(iTRAQ4plex), C3(Methylthio)	28.5301	4.28863	1	1	14872	Unique	Used	1.76813	2	814.879	1628.75	2.21805	89.0577	6075	6075	MS2	17/20	Plasma_iTRAQ_1_3.raw
																gi11321561	yycFQGNQFLR	1	1	HCD	N-Term(iTRAQ4plex), Y2(iTRAQ4plex), C3(Methylthio)	27.0636	4.26609	1	1	15593	Unique	Used	1.58591	2	886.93	1772.85	2.37514	45.0989	3994	3994	MS2	16/20	Plasma_iTRAQ_6.raw
																gi11321561	yYcFQGNQFLR	1	1	HCD	N-Term(iTRAQ4plex), C3(Methylthio)	35.5233	4.26503	1	1	11721	Unique	Used	1.85527	2	814.878	1628.75	1.09384	40.0271	2603	2603	MS2	16/20	Plasma_iTRAQ_1_3.raw
																gi11321561	yYcFQGnQFLR	1	1	HCD	N-Term(iTRAQ4plex), C3(Methylthio), N7(Deamidated)	21.4321	4.24899	1	1	16900	Unique	Used	1.62916	2	815.371	1629.73	1.68797	59.3021	5537	5537	MS2	17/20	Plasma_iTRAQ_6.raw
																gi11321561	yYcFQGNQFLR	1	1	HCD	N-Term(iTRAQ4plex), C3(Methylthio)	39.2501	4.22213	1	1	11288	Unique	Used	1.72582	2	814.878	1628.75	1.39363	33.2757	2131	2131	MS2	17/20	Plasma_iTRAQ_1_3.raw
																gi11321561	yYcFQGNQFLR	1	1	HCD	N-Term(iTRAQ4plex), C3(Methylthio)	41.2118	4.21048	1	1	13366	Unique	Used	1.90514	2	814.879	1628.75	2.06816	65.6535	4399	4399	MS2	17/20	Plasma_iTRAQ_1_3.raw
																gi11321561	yYcFQGNQFLR	1	1	HCD	N-Term(iTRAQ4plex), C3(Methylthio)	31.9772	4.1978	1	1	12036	Unique	Used	1.75316	2	814.878	1628.75	0.64416	44.9916	2950	2950	MS2	17/20	Plasma_iTRAQ_1_3.raw
																gi11321561	yYcFQGNQFLR	1	1	HCD	N-Term(iTRAQ4plex), C3(Methylthio)	71.6635	4.19416	1	1	13362	Unique	Used	1.55116	3	543.587	1628.75	-0.0760957	65.5751	4394	4394	MS2	14/40	Plasma_iTRAQ_1_3.raw
																gi11321561	yYcFQGNQFLR	1	1	HCD	N-Term(iTRAQ4plex), C3(Methylthio)	41.4082	4.1927	1	1	17406	Unique	Used	1.83368	2	814.878	1628.75	0.794054	67.6025	6294	6294	MS2	18/20	Plasma_iTRAQ_4.raw
																gi11321561	yYcFQGNQFLR	1	1	HCD	N-Term(iTRAQ4plex), C3(Methylthio)	22.8442	4.18121	1	1	11566	Unique	Used	1.75131	2	814.878	1628.75	1.16879	37.5678	2434	2434	MS2	17/20	Plasma_iTRAQ_1_3.raw
																gi11321561	yYcFQGNQFLR	1	1	HCD	N-Term(iTRAQ4plex), C3(Methylthio)	31.2186	4.17836	1	1	11213	Unique	Used	1.77222	2	814.878	1628.75	0.494265	32.1007	2049	2049	MS2	16/20	Plasma_iTRAQ_1_3.raw
																gi11321561	yYcFQGNQFLR	1	1	HCD	N-Term(iTRAQ4plex), C3(Methylthio)	38.274	4.16279	1	1	13558	Unique	Used	1.87355	2	814.878	1628.75	1.61847	68.7318	4611	4611	MS2	17/20	Plasma_iTRAQ_1_3.raw
																gi11321561	yYcFQGNQFLR	1	1	HCD	N-Term(iTRAQ4plex), C3(Methylthio)	33.8746	4.15225	1	1	14942	Unique	Used	1.65026	2	814.878	1628.75	1.61847	90.2964	6158	6158	MS2	17/20	Plasma_iTRAQ_1_3.raw
																gi11321561	yYcFQGNQFLR	1	1	HCD	N-Term(iTRAQ4plex), Y1(iTRAQ4plex), C3(Methylthio)	6.11641	4.15052	1	1	12030	Unique	Used	1.57064	3	591.623	1772.85	2.26428	63.2523	4171	4171	MS2	16/40	Plasma_iTRAQ_4_6.raw
																gi11321561	yYcFQGNQFLR	1	1	HCD	N-Term(iTRAQ4plex), Y1(iTRAQ4plex), C3(Methylthio)	34.251	4.13864	1	1	15702	Unique	Used	1.64653	2	886.93	1772.85	2.16858	46.3055	4122	4122	MS2	16/20	Plasma_iTRAQ_6.raw
																gi11321561	yYcFQGNQFLR	1	1	HCD	N-Term(iTRAQ4plex), C3(Methylthio)	32.3168	4.1335	1	1	11119	Unique	Used	1.66368	2	814.878	1628.75	1.24374	30.6461	1946	1946	MS2	17/20	Plasma_iTRAQ_1_3.raw
																gi11321561	yYcFQGNQFLR	1	1	HCD	N-Term(iTRAQ4plex), C3(Methylthio)	24.7215	4.12002	1	1	14433	Unique	Used	1.74074	2	814.88	1628.75	3.49215	82.8951	5602	5602	MS2	15/20	Plasma_iTRAQ_1_3.raw
																gi11321561	yYcFQGNQFLR	1	1	HCD	N-Term(iTRAQ4plex), C3(Methylthio)	20.6649	4.11311	1	1	11044	Unique	Used	1.74004	2	814.878	1628.75	1.0189	29.4796	1864	1864	MS2	17/20	Plasma_iTRAQ_1_3.raw
																gi11321561	yYcFQGNQFLR	1	1	HCD	N-Term(iTRAQ4plex), Y1(iTRAQ4plex), C3(Methylthio)	6.1601	4.07887	1	1	9437	Unique	Used	1.48268	3	591.621	1772.85	-0.317797	19.1484	1120	1120	MS2	16/40	Plasma_iTRAQ_4_6.raw
																gi11321561	yYcFQGNQFLR	1	1	HCD	N-Term(iTRAQ4plex), C3(Methylthio)	20.5528	4.06043	1	1	14183	Unique	Used	1.72054	2	814.878	1628.75	1.39363	78.8796	5325	5325	MS2	15/20	Plasma_iTRAQ_1_3.raw
																gi11321561	yYcFQGnQFLR	1	1	HCD	N-Term(iTRAQ4plex), Y1(iTRAQ4plex), C3(Methylthio), N7(Deamidated)	12.8298	4.03755	1	1	15752	Unique	Used	1.4032	2	887.421	1773.84	1.13106	46.7876	4178	4178	MS2	13/20	Plasma_iTRAQ_6.raw
																gi11321561	yYcFQGNQFLR	1	1	HCD	N-Term(iTRAQ4plex), C3(Methylthio)	30.0507	4.03255	1	1	12329	Unique	Used	1.65471	2	814.878	1628.75	1.46858	49.643	3272	3272	MS2	15/20	Plasma_iTRAQ_1_3.raw
																gi11321561	yYcFQGNQFLR	1	1	HCD	N-Term(iTRAQ4plex), Y1(iTRAQ4plex), C3(Methylthio)	46.208	4.00212	1	1	15480	Unique	Used	1.57341	3	591.621	1772.85	-0.317797	43.7382	3857	3857	MS2	17/40	Plasma_iTRAQ_6.raw
																gi11321561	yYcFQGNQFLR	1	1	HCD	N-Term(iTRAQ4plex), C3(Methylthio)	29.5999	3.9778	1	1	17998	Unique	Used	1.82507	2	814.879	1628.75	1.76837	75.9689	6977	6977	MS2	17/20	Plasma_iTRAQ_4.raw
																gi11321561	yYcFQGNQFLR	1	1	HCD	N-Term(iTRAQ4plex), Y1(iTRAQ4plex), C3(Methylthio)	8.47511	3.95764	1	1	12526	Unique	Used	1.66295	3	591.622	1772.85	1.33473	71.1004	4740	4740	MS2	16/40	Plasma_iTRAQ_4_6.raw
																gi11321561	yYcFQGNQFLR	1	1	HCD	N-Term(iTRAQ4plex), C3(Methylthio)	22.4057	3.95719	1	1	14783	Unique	Used	1.78638	2	814.878	1628.75	0.869001	87.6283	5975	5975	MS2	15/20	Plasma_iTRAQ_1_3.raw
																gi11321561	yYcFQGnQFLR	1	1	HCD	N-Term(iTRAQ4plex), Y1(iTRAQ4plex), C3(Methylthio), N7(Deamidated)	35.4622	3.95046	1	1	15867	Unique	Used	1.39279	2	887.421	1773.83	0.78697	47.9962	4312	4312	MS2	17/20	Plasma_iTRAQ_6.raw
																gi11321561	yYcFQGNQFLR	1	1	HCD	N-Term(iTRAQ4plex), C3(Methylthio)	75.7792	3.94672	1	1	13548	Unique	Used	1.45285	3	543.587	1628.75	0.261167	68.5651	4600	4600	MS2	14/40	Plasma_iTRAQ_1_3.raw
																gi11321561	yYcFQGNQFLR	1	1	HCD	N-Term(iTRAQ4plex), C3(Methylthio)	37.8196	3.93598	1	1	12196	Unique	Used	1.7421	2	814.879	1628.75	1.69342	47.5652	3128	3128	MS2	17/20	Plasma_iTRAQ_1_3.raw
																gi11321561	yYcFQGNQFLR	1	1	HCD	N-Term(iTRAQ4plex), Y1(iTRAQ4plex), C3(Methylthio)	6.51014	3.92575	1	1	9269	Unique	Used	1.15332	3	591.621	1772.85	-0.73093	16.2326	918	918	MS2	18/40	Plasma_iTRAQ_4_6.raw
																gi11321561	yYcFQGNQFLR	1	1	HCD	N-Term(iTRAQ4plex), C3(Methylthio)	30.7722	3.92316	1	1	13840	Unique	Used	1.66108	2	814.879	1628.75	2.06816	57.0607	5015	5015	MS2	17/20	Plasma_iTRAQ_7.raw
																gi11321561	yYcFQGNQFLR	1	1	HCD	N-Term(iTRAQ4plex), C3(Methylthio)	16.3914	3.89492	1	1	16725	Unique	Used	1.69433	2	814.879	1628.75	2.06816	57.2642	5325	5325	MS2	16/20	Plasma_iTRAQ_6.raw
																gi11321561	yYcFQGNQFLR	1	1	HCD	N-Term(iTRAQ4plex), C3(Methylthio)	32.7946	3.82884	1	1	14331	Unique	Used	1.61832	2	814.879	1628.75	1.91826	81.3617	5493	5493	MS2	14/20	Plasma_iTRAQ_1_3.raw
																gi11321561	yYcFQGNQFLR	1	1	HCD	N-Term(iTRAQ4plex), C3(Methylthio)	43.8432	3.8066	1	1	9236	Unique	Used	1.30862	2	814.878	1628.75	1.0189	61.7331	4402	4402	MS2	17/20	Plasma_iTRAQ_8.raw
																gi11321561	yYcFQGNQFLR	1	1	HCD	N-Term(iTRAQ4plex), C3(Methylthio)	28.0675	3.78252	1	1	18852	Unique	Used	1.69846	2	814.879	1628.75	2.36794	89.1425	7961	7961	MS2	15/20	Plasma_iTRAQ_4.raw
																gi11321561	yYcFQGNQFLR	1	1	HCD	N-Term(iTRAQ4plex), C3(Methylthio)	22.0493	3.75533	1	1	13917	Unique	Used	1.6236	2	814.88	1628.75	3.19236	74.6052	5013	5013	MS2	17/20	Plasma_iTRAQ_1_3.raw
																gi11321561	yYcFQGnQFLR	1	1	HCD	N-Term(iTRAQ4plex), C3(Methylthio), N7(Deamidated)	8.03463	3.7547	1	1	17324	Unique	Used	1.83777	2	815.37	1629.73	0.714248	66.5135	6201	6201	MS2	15/20	Plasma_iTRAQ_4.raw
																gi11321561	yYcFQGNQFLR	1	1	HCD	N-Term(iTRAQ4plex), C3(Methylthio)	20.2335	3.72776	1	1	14250	Unique	Used	1.68876	2	814.879	1628.75	2.1431	80.0675	5404	5404	MS2	16/20	Plasma_iTRAQ_1_3.raw
																gi11321561	yYcFQGNQFLR	1	1	HCD	N-Term(iTRAQ4plex), C3(Methylthio)	20.9836	3.68525	1	1	13843	Unique	Used	1.54977	2	814.878	1628.75	1.54353	73.3714	4929	4929	MS2	14/20	Plasma_iTRAQ_1_3.raw
																gi11321561	yYcFQGNQFLR	1	1	HCD	N-Term(iTRAQ4plex), C3(Methylthio)	20.3068	3.59565	1	1	13470	Unique	Used	1.45767	2	814.879	1628.75	2.293	67.2814	4513	4513	MS2	14/20	Plasma_iTRAQ_1_3.raw
																gi11321561	yYcFQGNQFLR	1	1	HCD	N-Term(iTRAQ4plex), C3(Methylthio)	13.2355	3.47082	1	1	14115	Unique	Used	1.47033	2	814.878	1628.75	1.16879	77.5721	5240	5240	MS2	15/20	Plasma_iTRAQ_1_3.raw
																gi11321561	yYcFQGNQFLR	1	1	HCD	N-Term(iTRAQ4plex), C3(Methylthio)	79.4638	3.46461	1	1	13624	Unique	Used	1.55842	3	543.587	1628.75	-0.300938	69.7956	4684	4684	MS2	14/40	Plasma_iTRAQ_1_3.raw
																gi11321561	yYcFQGNQFLR	1	1	HCD	N-Term(iTRAQ4plex), C3(Methylthio)	15.4429	3.45589	1	1	10960	Unique	Used	1.50516	2	814.878	1628.75	1.09384	28.144	1772	1772	MS2	16/20	Plasma_iTRAQ_1_3.raw
																gi11321561	yYcFQGNQFLR	1	1	HCD	N-Term(iTRAQ4plex), C3(Methylthio)	22.081	3.19597	1	1	12427	Unique	Used	1.50463	2	814.878	1628.75	1.0189	51.1539	3379	3379	MS2	15/20	Plasma_iTRAQ_1_3.raw
																gi11321561	yYcFQGNQFLR	1	1	HCD	N-Term(iTRAQ4plex), C3(Methylthio)	15.0256	3.14965	1	1	13721	Unique	Used	1.42277	2	814.878	1628.75	1.24374	71.4297	4794	4794	MS2	14/20	Plasma_iTRAQ_1_3.raw
																gi11321561	yYcFQGNQFLR	1	1	HCD	N-Term(iTRAQ4plex), C3(Methylthio)	13.303	3.07843	1	1	10877	Unique	Used	1.46505	2	814.879	1628.75	1.76837	26.8423	1681	1681	MS2	14/20	Plasma_iTRAQ_1_3.raw
gi115298674	NID1	4811	nidogen 1 precursor	1247	136.3	1.04	1	1	1.221		S		Extracellular	Extracellular matrix structural constituent;	Cell growth and/or maintenance;
																gi115298674	aSLHGGEPTTIIR	1	1	HCD	N-Term(iTRAQ4plex)	26.3269	4.1642	1	1	13060	Unique	Used	1.22129	3	499.282	1495.83	-3.06008	22.0088	1466	1466	MS2	14/48	Plasma_iTRAQ_5.raw
gi115298678	C3	718	complement component 3 precursor	1663	187	11.12	7	6	0.627	22.6531	S		Extracellular	Complement activity;	Immune response;
																gi115298678	aGDFLEANYMNLQR	2	1	HCD	N-Term(iTRAQ4plex)	30.6488	5.43527	1	1	19970	Unique	Used	0.838228	2	893.441	1785.88	2.34475	56.6836	5595	5595	MS2	22/26	Plasma_iTRAQ_2.raw
																gi115298678	aGDFLEAnYMNLQR	2	1	HCD	N-Term(iTRAQ4plex), N8(Deamidated)	2.55158	4.69909	1	1	19910	Unique	Used	1.6339	2	893.917	1786.83	-15.9694	56.0519	5528	5528	MS2	14/26	Plasma_iTRAQ_2.raw
																gi115298678	aYYENSPQQVFSTEFEVk	2	1	HCD	N-Term(iTRAQ4plex), K18(iTRAQ4plex)	59.0046	4.99208	1	1	20159	Unique	Used	0.999036	3	818.741	2454.21	0.117391	58.323	5798	5798	MS2	22/68	Plasma_iTRAQ_2.raw
																gi115298678	dFDFVPPVVR	2	1	HCD	N-Term(iTRAQ4plex)	20.8333	3.58815	1	1	19833	Unique	Used	0.886791	2	667.866	1334.72	0.927669	55.4181	5446	5446	MS2	13/18	Plasma_iTRAQ_2.raw
																gi115298678	eYVLPSFEVIVEPTEk	2	1	HCD	N-Term(iTRAQ4plex), K16(iTRAQ4plex)	18.3325	4.87913	1	1	20874	Unique	Used	1.14657	3	723.064	2167.18	0.497802	65.0947	6579	6579	MS2	18/60	Plasma_iTRAQ_2.raw
																gi115298678	gYTQQLAFR	2	1	HCD	N-Term(iTRAQ4plex)	34.6978	3.76577	1	1	17012	Unique	Used	0.6433	2	614.335	1227.66	2.63545	29.8042	2386	2386	MS2	15/16	Plasma_iTRAQ_2.raw
																gi115298678	vLLDGVQNPR	1	1	HCD	N-Term(iTRAQ4plex)	17.0395	3.53703	1	1	16888	Unique	Used	0.522323	2	627.869	1254.73	1.93061	28.8104	2253	2253	MS2	15/18	Plasma_iTRAQ_2.raw
gi115529478	NCAM1	4684	neural cell adhesion molecule 1 isoform 3	761	83.7	1.45	1	1	1.172		S	T	Plasma membrane	Cell adhesion molecule activity;	Cell communication; Signal transduction;
																gi115529478	aGEQDATIHLk	3	1	HCD	N-Term(iTRAQ4plex), K11(iTRAQ4plex)	10.4936	4.33195	1	1	13360	Unique	Used	1.17245	3	490.942	1470.81	-2.22892	22.5444	1423	1423	MS2	21/40	Plasma_iTRAQ_6.raw
gi115583663	SERPINF2	5345	alpha-2-antiplasmin isoform a precursor	491	54.5	48.68	63	10	1.272	8.95762	S		Extracellular	Protease inhibitor activity;	Protein metabolism;
																gi115583663	dFLQSLk	2	1	HCD	N-Term(iTRAQ4plex), K7(iTRAQ4plex)	11.1447	3.28505	1	1	15682	Unique	Used	1.54502	2	569.838	1138.67	-1.70578	47.9414	4389	4389	MS2	11/12	Plasma_iTRAQ_4.raw
																gi115583663	dFLQSLk	2	1	HCD	N-Term(iTRAQ4plex), K7(iTRAQ4plex)	10.9736	3.16727	1	1	7851	Unique	Used	1.63172	2	569.839	1138.67	-0.312122	26.3972	2575	2575	MS2	12/12	Plasma_iTRAQ_6_8.raw
																gi115583663	dFLQSLk	2	1	HCD	N-Term(iTRAQ4plex), K7(iTRAQ4plex)	9.54537	3.14465	1	1	7826	Unique	Used	1.53061	2	569.839	1138.67	0.223899	26.1552	2549	2549	MS2	12/12	Plasma_iTRAQ_6_8.raw
																gi115583663	dFLQSLk	2	1	HCD	N-Term(iTRAQ4plex), K7(iTRAQ4plex)	10.9736	3.1368	1	1	7846	Unique	Used	1.61176	2	569.839	1138.67	-0.312122	26.3536	2570	2570	MS2	12/12	Plasma_iTRAQ_6_8.raw
																gi115583663	dFLQSLk	2	1	HCD	N-Term(iTRAQ4plex), K7(iTRAQ4plex)	13.2246	3.12541	1	1	7869	Unique	Used	1.40873	2	569.839	1138.67	-0.0977137	26.5992	2595	2595	MS2	12/12	Plasma_iTRAQ_6_8.raw
																gi115583663	dFLQSLk	2	1	HCD	N-Term(iTRAQ4plex), K7(iTRAQ4plex)	12.8834	3.05987	1	1	7837	Unique	Used	1.58131	2	569.839	1138.67	0.223899	26.2696	2560	2560	MS2	12/12	Plasma_iTRAQ_6_8.raw
																gi115583663	dFLQSLk	2	1	HCD	N-Term(iTRAQ4plex), K7(iTRAQ4plex)	10.2495	3.05227	1	1	7877	Unique	Used	1.50796	2	569.839	1138.67	-0.0977137	26.6641	2603	2603	MS2	12/12	Plasma_iTRAQ_6_8.raw
																gi115583663	dSFHLDEQFTVPVEMMQAR	2	1	HCD	N-Term(iTRAQ4plex)	69.8746	5.86603	1	1	18092	Unique	Used	1.31	3	808.722	2424.15	3.2063	77.1367	7085	7085	MS2	23/72	Plasma_iTRAQ_4.raw
																gi115583663	dSFHLDEQFTVPVEMMQAR	2	1	HCD	N-Term(iTRAQ4plex)	32.7579	5.83986	1	1	8389	Unique	Used	1.5688	3	808.721	2424.15	1.99776	31.3948	3149	3149	MS2	24/72	Plasma_iTRAQ_6_8.raw
																gi115583663	dSFHLDEQFTVPVEMMQAR	2	1	HCD	N-Term(iTRAQ4plex)	56.525	5.83899	1	1	8379	Unique	Used	1.48554	3	808.721	2424.15	1.99776	31.3145	3139	3139	MS2	26/72	Plasma_iTRAQ_6_8.raw
																gi115583663	dSFHLDEQFTVPVEMMQAR	2	1	HCD	N-Term(iTRAQ4plex)	47.4061	5.8319	1	1	8367	Unique	Used	1.1986	3	808.721	2424.15	1.31796	31.2049	3126	3126	MS2	26/72	Plasma_iTRAQ_6_8.raw
																gi115583663	dSFHLDEQFTVPVEMMQAR	2	1	HCD	N-Term(iTRAQ4plex)	52.8563	5.69369	1	1	8369	Unique	Used	1.1771	3	808.721	2424.15	1.31796	31.2185	3128	3128	MS2	25/72	Plasma_iTRAQ_6_8.raw
																gi115583663	dSFHLDEQFTVPVEMMQAR	2	1	HCD	N-Term(iTRAQ4plex)	59.3018	5.55809	1	1	8370	Unique	Used	1.1804	3	808.721	2424.15	1.31796	31.2257	3129	3129	MS2	23/72	Plasma_iTRAQ_6_8.raw
																gi115583663	dSFHLDEQFTVPVEMmQAR	2	1	HCD	N-Term(iTRAQ4plex), M16(Oxidation)	26.0665	5.36526	1	1	17042	Unique	Used	1.03908	3	814.05	2440.14	-1.43429	62.8262	5882	5882	MS2	23/72	Plasma_iTRAQ_4.raw
																gi115583663	dSFHLDEQFTVPVEMMQAR	2	1	HCD	N-Term(iTRAQ4plex)	27.2083	5.06927	1	1	8386	Unique	Used	1.51176	3	808.721	2424.15	1.99776	31.3718	3146	3146	MS2	24/72	Plasma_iTRAQ_6_8.raw
																gi115583663	dSFHLDEQFTVPVEmmQAR	2	1	HCD	N-Term(iTRAQ4plex), M15(Oxidation), M16(Oxidation)	5.92933	4.71101	1	1	16320	Unique	Used	0.981567	3	819.384	2456.14	0.695082	54.5847	5087	5087	MS2	18/72	Plasma_iTRAQ_4.raw
																gi115583663	gISEQSLVVSGVQHQSTLELSEVGVEAAAATSIAmSR	2	1	HCD	N-Term(iTRAQ4plex), M35(Oxidation)	69.261	9.78182	1	1	21557	Unique	Used	1.37604	3	1301.34	3902	0.871876	72.7239	7385	7385	MS2	34/144	Plasma_iTRAQ_3.raw
																gi115583663	gISEQSLVVSGVQHQSTLELSEVGVEAAAATSIAMSR	2	1	HCD	N-Term(iTRAQ4plex)	138.116	9.56366	1	1	22169	Unique	Used	0.964062	3	1296	3886	0.195179	79.2485	8070	8070	MS2	38/144	Plasma_iTRAQ_3.raw
																gi115583663	gISEQSLVVSGVQHQSTLELSEVGVEAAAATSIAMSR	2	1	HCD	N-Term(iTRAQ4plex)	300	9.2969	1	1	22093	Unique	Used	1.20547	3	1296	3885.99	-0.935685	78.2267	7986	7986	MS2	34/144	Plasma_iTRAQ_3.raw
																gi115583663	gISEQSLVVSGVQHQSTLELSEVGVEAAAATSIAMSR	2	1	HCD	N-Term(iTRAQ4plex)	135.601	9.21447	1	1	22020	Unique	Used	2.74105	3	1296	3886	0.00670195	77.3183	7902	7902	MS2	38/144	Plasma_iTRAQ_3.raw
																gi115583663	gISEQSLVVSGVQHQSTLELSEVGVEAAAATSIAMSR	2	1	HCD	N-Term(iTRAQ4plex)	136.344	9.14477	1	1	21894	Unique	Used	3.20688	3	1296	3886	0.00670195	76.1772	7763	7763	MS2	38/144	Plasma_iTRAQ_3.raw
																gi115583663	gISEQSLVVSGVQHQSTLELSEVGVEAAAATSIAMSR	2	1	HCD	N-Term(iTRAQ4plex)	105.164	8.7861	1	1	22067	Unique	Used	0.982011	4	972.255	3886	-0.232355	77.8649	7955	7955	MS2	30/216	Plasma_iTRAQ_3.raw
																gi115583663	gISEQSLVVSGVQHQSTLELSEVGVEAAAATSIAmSR	2	1	HCD	N-Term(iTRAQ4plex), M35(Oxidation)	137.319	8.67997	1	1	21561	Unique	Used	0.982011	4	976.254	3901.99	-0.242154	72.7892	7390	7390	MS2	33/216	Plasma_iTRAQ_3.raw
																gi115583663	gISEQSLVVSGVQHQSTLELSEVGVEAAAATSIAmSR	2	1	HCD	N-Term(iTRAQ4plex), M35(Oxidation)	300	8.63218	1	1	21805	Unique	Used	1.88815	4	976.255	3902	1.50975	75.3067	7662	7662	MS2	30/216	Plasma_iTRAQ_3.raw
																gi115583663	gISEQSLVVSGVQHQSTLELSEVGVEAAAATSIAmSR	2	1	HCD	N-Term(iTRAQ4plex), M35(Oxidation)	135.91	8.60021	1	1	21822	Unique	Used	1.06185	3	1301.34	3901.99	-0.348202	75.5101	7683	7683	MS2	34/144	Plasma_iTRAQ_3.raw
																gi115583663	lcqDLGPGAFR	2	1	HCD	N-Term(iTRAQ4plex), C2(Methylthio), Q3(Deamidated)	17.998	4.81482	1	1	20150	Unique	Used	1.43948	2	684.334	1367.66	2.43668	58.4193	5814	5814	MS2	17/20	Plasma_iTRAQ_3.raw
																gi115583663	lcQDLGPGAFR	2	1	HCD	N-Term(iTRAQ4plex), C2(Methylthio)	17.2966	4.54235	1	1	8165	Unique	Used	1.23716	2	683.841	1366.67	1.10392	29.3829	2910	2910	MS2	17/20	Plasma_iTRAQ_6_8.raw
																gi115583663	lcQDLGPGAFR	2	1	HCD	N-Term(iTRAQ4plex), C2(Methylthio)	16.8955	4.5025	1	1	20071	Unique	Used	1.4376	2	683.841	1366.68	1.9078	57.7874	5730	5730	MS2	17/20	Plasma_iTRAQ_3.raw
																gi115583663	lcQDLGPGAFR	2	1	HCD	N-Term(iTRAQ4plex), C2(Methylthio)	15.2065	4.3418	1	1	8195	Unique	Used	1.23556	2	683.841	1366.67	1.4612	29.6411	2942	2942	MS2	17/20	Plasma_iTRAQ_6_8.raw
																gi115583663	lcQDLGPGAFR	2	1	HCD	N-Term(iTRAQ4plex), C2(Methylthio)	19.1478	4.33204	1	1	16788	Unique	Used	1.37214	2	683.841	1366.68	1.63984	59.6485	5598	5598	MS2	16/20	Plasma_iTRAQ_4.raw
																gi115583663	lcQDLGPGAFR	2	1	HCD	N-Term(iTRAQ4plex), C2(Methylthio)	13.5614	4.27598	1	1	8176	Unique	Used	1.20376	2	683.841	1366.67	1.55052	29.4802	2922	2922	MS2	17/20	Plasma_iTRAQ_6_8.raw
																gi115583663	lcQDLGPGAFR	2	1	HCD	N-Term(iTRAQ4plex), C2(Methylthio)	20.4135	4.21069	1	1	19978	Unique	Used	1.33358	2	683.841	1366.68	2.08643	56.9375	5629	5629	MS2	17/20	Plasma_iTRAQ_3.raw
																gi115583663	lcQDLGPGAFR	2	1	HCD	N-Term(iTRAQ4plex), C2(Methylthio)	41.5217	4.08855	1	1	20011	Unique	Used	1.48968	3	456.23	1366.67	1.45136	57.2143	5664	5664	MS2	18/40	Plasma_iTRAQ_3.raw
																gi115583663	lcQDLGPGAFR	2	1	HCD	N-Term(iTRAQ4plex), C2(Methylthio)	1	3.9194	1	1	20027	Unique	Used	1.57403	1	1366.68	1366.68	5.89231	57.3514	5681	5681	MS2	13/20	Plasma_iTRAQ_3.raw
																gi115583663	lcQDLGPGAFR	2	1	HCD	N-Term(iTRAQ4plex), C2(Methylthio)	24.6293	3.91884	1	1	8191	Unique	Used	1.04768	2	683.841	1366.67	1.4612	29.61	2938	2938	MS2	17/20	Plasma_iTRAQ_6_8.raw
																gi115583663	lGnQEPGGQTALk	1	1	HCD	N-Term(iTRAQ4plex), N3(Deamidated), K13(iTRAQ4plex)	41.8897	5.4089	1	1	13164	Unique	Used	1.08031	2	801.439	1601.87	-1.86542	23.1019	1651	1651	MS2	23/24	Plasma_iTRAQ_4.raw
																gi115583663	lGNQEPGGQTALk	1	1	HCD	N-Term(iTRAQ4plex), K13(iTRAQ4plex)	26.8228	5.36241	1	1	16137	Unique	Used	1.11031	2	800.952	1600.9	4.39055	21.4968	1425	1425	MS2	24/24	Plasma_iTRAQ_3.raw
																gi115583663	lGNQEPGGQTALk	1	1	HCD	N-Term(iTRAQ4plex), K13(iTRAQ4plex)	19.1525	5.30374	1	1	12949	Unique	Used	1.31628	2	800.951	1600.89	2.71303	21.3268	1420	1420	MS2	23/24	Plasma_iTRAQ_4.raw
																gi115583663	lGnQEPGGQTALk	1	1	HCD	N-Term(iTRAQ4plex), N3(Deamidated), K13(iTRAQ4plex)	37.3526	5.26645	1	1	16330	Unique	Used	1.29418	2	801.444	1601.88	4.07853	23.1831	1637	1637	MS2	23/24	Plasma_iTRAQ_3.raw
																gi115583663	lGNQEPGGQTALk	1	1	HCD	N-Term(iTRAQ4plex), K13(iTRAQ4plex)	22.393	5.25762	1	1	6911	Unique	Used	1.36429	2	800.95	1600.89	1.49301	18.2246	1573	1573	MS2	23/24	Plasma_iTRAQ_6_8.raw
																gi115583663	lGNQEPGGQTALk	1	1	HCD	N-Term(iTRAQ4plex), K13(iTRAQ4plex)	20.0097	5.21683	1	1	6909	Unique	Used	1.23323	2	800.95	1600.89	1.49301	18.2088	1571	1571	MS2	24/24	Plasma_iTRAQ_6_8.raw
																gi115583663	lGNQEPGGQTALk	1	1	HCD	N-Term(iTRAQ4plex), K13(iTRAQ4plex)	19.3515	5.13008	1	1	6932	Unique	Used	1.0806	2	800.949	1600.89	0.882996	18.4251	1595	1595	MS2	24/24	Plasma_iTRAQ_6_8.raw
																gi115583663	lGnQEPGGQTALk	1	1	HCD	N-Term(iTRAQ4plex), N3(Deamidated), K13(iTRAQ4plex)	57.9776	4.9332	1	1	16459	Unique	Used	1.29892	2	801.441	1601.88	0.877952	24.2317	1776	1776	MS2	22/24	Plasma_iTRAQ_3.raw
																gi115583663	lGnQEPGGQTALk	1	1	HCD	N-Term(iTRAQ4plex), N3(Deamidated), K13(iTRAQ4plex)	19.4702	4.65807	1	1	16237	Unique	Used	1.18	2	801.444	1601.88	4.53576	22.2632	1532	1532	MS2	23/24	Plasma_iTRAQ_3.raw
																gi115583663	lGNQEPGGQTALk	1	1	HCD	N-Term(iTRAQ4plex), K13(iTRAQ4plex)	49.6064	3.97098	1	1	12961	Unique	Used	1.24767	3	534.302	1600.89	1.63711	21.4364	1433	1433	MS2	21/48	Plasma_iTRAQ_4.raw
																gi115583663	lQQVLHAGSGPcLPHLLSR	2	1	HCD	N-Term(iTRAQ4plex), C12(Methylthio)	53.8286	5.25211	1	1	8404	Unique	Used	1.04391	4	554.805	2216.2	3.83743	31.5344	3165	3165	MS2	27/108	Plasma_iTRAQ_6_8.raw
																gi115583663	lQQVLHAGSGPcLPHLLSR	2	1	HCD	N-Term(iTRAQ4plex), C12(Methylthio)	29.6348	3.39054	1	1	8403	Unique	Used	1.12337	4	554.805	2216.2	3.83743	31.5254	3164	3164	MS2	22/108	Plasma_iTRAQ_6_8.raw
																gi115583663	lVPPMEEDYPQFGSPk	2	1	HCD	N-Term(iTRAQ4plex), K16(iTRAQ4plex)	48.9288	4.8817	1	1	16628	Unique	Used	1.3534	3	708.031	2122.08	0.787027	57.8179	5422	5422	MS2	19/60	Plasma_iTRAQ_4.raw
																gi115583663	lVPPMEEDYPQFGSPk	2	1	HCD	N-Term(iTRAQ4plex), K16(iTRAQ4plex)	23.7024	4.81776	1	1	16807	Unique	Used	1.53315	3	708.033	2122.08	3.54817	59.8917	5620	5620	MS2	17/60	Plasma_iTRAQ_4.raw
																gi115583663	nkFDPSLTQR	2	1	HCD	N-Term(iTRAQ4plex), K2(iTRAQ4plex)	1	3.16658	1	1	12978	Unique	Used	0.976508	2	747.42	1493.83	0.395994	21.5633	1451	1451	MS2	14/18	Plasma_iTRAQ_4.raw
																gi115583663	qEDDLANINQWVk	2	1	HCD	N-Term(iTRAQ4plex), K13(iTRAQ4plex)	55.9907	6.70709	1	1	19744	Unique	Used	1.54	2	930.989	1860.97	0.367052	54.8083	5376	5376	MS2	20/24	Plasma_iTRAQ_3.raw
																gi115583663	qEDDLANINQWVk	2	1	HCD	N-Term(iTRAQ4plex), K13(iTRAQ4plex)	83.1836	6.41386	1	1	16578	Unique	Used	1.5366	2	930.988	1860.97	-0.485684	57.3165	5368	5368	MS2	20/24	Plasma_iTRAQ_4.raw
																gi115583663	qEDDLAnINQWVk	2	1	HCD	N-Term(iTRAQ4plex), N7(Deamidated), K13(iTRAQ4plex)	67.009	6.22547	1	1	19982	Unique	Used	1.26757	2	931.485	1861.96	5.21442	56.9666	5633	5633	MS2	20/24	Plasma_iTRAQ_3.raw
																gi115583663	qEDDLANINQWVk	2	1	HCD	N-Term(iTRAQ4plex), K13(iTRAQ4plex)	45.269	4.97341	1	1	16562	Unique	Used	1.75773	3	620.995	1860.97	0.622206	57.1604	5351	5351	MS2	24/48	Plasma_iTRAQ_4.raw
																gi115583663	qLTSGPNQEQVSPLTLLk	2	1	HCD	N-Term(iTRAQ4plex), K18(iTRAQ4plex)	102.138	8.00258	1	1	20049	Unique	Used	4.05162	2	1121.14	2241.28	3.70244	57.587	5706	5706	MS2	23/34	Plasma_iTRAQ_3.raw
																gi115583663	qLTSGPNQEQVSPLTLLk	2	1	HCD	N-Term(iTRAQ4plex), K18(iTRAQ4plex)	102.538	7.63075	1	1	16871	Unique	Used	3.94216	2	1121.14	2241.27	-0.327945	60.6821	5691	5691	MS2	22/34	Plasma_iTRAQ_4.raw
																gi115583663	qLTSGPNQEQVSPLTLLk	2	1	HCD	N-Term(iTRAQ4plex), K18(iTRAQ4plex)	95.4768	7.27548	1	1	16865	Unique	Used	2.72766	3	747.762	2241.27	0.40133	60.637	5685	5685	MS2	30/68	Plasma_iTRAQ_4.raw
																gi115583663	qLTSGPnQEQVSPLTLLk	2	1	HCD	N-Term(iTRAQ4plex), N7(Deamidated), K18(iTRAQ4plex)	54.8161	6.94969	1	1	20164	Unique	Used	1.61321	3	748.093	2242.26	4.56265	58.5373	5829	5829	MS2	25/68	Plasma_iTRAQ_3.raw
																gi115583663	qLTSGPnQEQVSPLTLLk	2	1	HCD	N-Term(iTRAQ4plex), N7(Deamidated), K18(iTRAQ4plex)	91.6832	6.82005	1	1	20180	Unique	Used	3.13051	2	1121.63	2242.26	1.13889	58.6773	5846	5846	MS2	24/34	Plasma_iTRAQ_3.raw
																gi115583663	qLTSGPnQEQVSPLTLLk	2	1	HCD	N-Term(iTRAQ4plex), N7(Deamidated), K18(iTRAQ4plex)	63.7451	6.79168	1	1	20262	Unique	Used	2.10306	3	748.091	2242.26	1.70452	59.4891	5936	5936	MS2	27/68	Plasma_iTRAQ_3.raw
																gi115583663	qLTSGPnQEQVSPLTLLk	2	1	HCD	N-Term(iTRAQ4plex), N7(Deamidated), K18(iTRAQ4plex)	61.4593	6.47344	1	1	17037	Unique	Used	1.59738	3	748.092	2242.26	3.33774	62.7778	5877	5877	MS2	28/68	Plasma_iTRAQ_4.raw
																gi115583663	qLTSGPNQEQVSPLTLLk	2	1	HCD	N-Term(iTRAQ4plex), K18(iTRAQ4plex)	81.1256	6.43844	1	1	20058	Unique	Used	3.80344	2	1121.13	2241.25	-9.0424	57.6825	5716	5716	MS2	23/34	Plasma_iTRAQ_3.raw
																gi115583663	qLTSGPNQEQVSPLTLLk	2	1	HCD	N-Term(iTRAQ4plex), K18(iTRAQ4plex)	45.5604	5.88498	1	1	20021	Unique	Used	1.1383	3	747.763	2241.27	1.70848	57.3085	5675	5675	MS2	27/68	Plasma_iTRAQ_3.raw
gi116292750	LPA	4018	lipoprotein Lp(a) precursor	2040	226.4	6.57	3	3	0.738	72.6584	S		Extracellular	Transporter activity;	Transport;
																gi116292750	aTTVTGTPcqEWAAqEPHR	1	1	HCD	N-Term(iTRAQ4plex), C9(Methylthio), Q10(Deamidated), Q15(Deamidated)	49.0047	5.4205	1	1	14772	Unique	Used	1.11726	3	759.018	2275.04	6.6062	39.5021	3393	3393	MS2	16/72	Plasma_iTRAQ_5.raw
																gi116292750	nPDAVAAPYcYTR	1	1	HCD	N-Term(iTRAQ4plex), C10(Methylthio)	30.2595	4.18046	1	1	17427	Unique	Used	0.664235	2	815.879	1630.75	1.88906	46.5262	4302	4302	MS2	16/24	Plasma_iTRAQ_1.raw
																gi116292750	tTEYYPnGGLTR	1	1	HCD	N-Term(iTRAQ4plex), N7(Deamidated)	30.2767	4.2871	1	1	15746	Unique	Used	0.193884	2	758.88	1516.75	8.13359	30.453	2486	2486	MS2	15/22	Plasma_iTRAQ_1.raw
gi11641247	GLIPR2	152007	golgi-associated plant pathogenesis-related protein 1	154	17.2	16.88	2	2	1.152				-	Molecular function unknown;	Biological_process unknown;
																gi11641247	aSASDGSSFVVAR	1	1	HCD	N-Term(iTRAQ4plex)	13.3104	4.36933	1	1	14954	Unique	Used	1.06775	2	699.363	1397.72	2.95125	23.2813	1629	1629	MS2	22/24	Plasma_iTRAQ_1.raw
																gi11641247	eAQQYSEALASTR	1	1	HCD	N-Term(iTRAQ4plex)	42.7758	5.23176	1	1	15762	Unique	Used	1.24381	2	799.405	1597.8	5.88055	30.5799	2503	2503	MS2	21/24	Plasma_iTRAQ_1.raw
gi11641269	DPEP2	64174	dipeptidase 2 precursor	486	53.3	6.79	2	2	1.281		S		-	Peptidase activity;	Protein metabolism;
																gi11641269	aLEVSQAPVIFSHSAAR	1	1	HCD	N-Term(iTRAQ4plex)	46.3666	6.21992	1	1	15145	Unique	Used	1.22854	3	643.024	1927.06	3.07158	43.8093	3826	3826	MS2	26/64	Plasma_iTRAQ_5.raw
																gi11641269	dFPLVDGHNDLPLVLR	1	1	HCD	N-Term(iTRAQ4plex)	72.3384	7.17009	1	1	16902	Unique	Used	1.33608	3	655.364	1964.08	2.19337	63.5894	5852	5852	MS2	24/60	Plasma_iTRAQ_5.raw
gi116534898	DSG2	1829	desmoglein 2 preproprotein	1118	122.2	1.25	1	1	1.188		S	T	Plasma membrane	Cell adhesion molecule activity;	Cell growth and/or maintenance;
																gi116534898	gITEPPFGIFVFNk	1	1	HCD	N-Term(iTRAQ4plex), K14(iTRAQ4plex)	62.2309	5.42579	1	1	17730	Unique	Used	1.18803	2	927.524	1854.04	0.529726	74.48	6818	6818	MS2	15/26	Plasma_iTRAQ_5.raw
gi116534900	DBH	1621	dopamine beta hydroxylase precursor	617	69	4.54	2	2	1.189	13.1277	S		Extracellular	Catalytic activity;	Cell communication; Signal transduction;
																gi116534900	gQIHLDPQQDYQLLQVQR	1	1	HCD	N-Term(iTRAQ4plex)	97.9206	7.85056	1	1	15844	Unique	Used	1.29947	3	775.084	2323.24	3.67756	51.9316	4646	4646	MS2	29/68	Plasma_iTRAQ_5.raw
																gi116534900	sAVDAGFLQk	1	1	HCD	N-Term(iTRAQ4plex), K10(iTRAQ4plex)	7.34856	3.81783	1	1	17242	Unique	Used	1.07871	2	662.38	1323.75	0.759579	30.9438	2625	2625	MS2	17/18	Plasma_iTRAQ_3.raw
gi11761629	FGA	2243	fibrinogen, alpha polypeptide isoform alpha preproprotein	644	69.7	43.48	99	22	1.314	11.0296	S		Extracellular	Protein binding;	Protein metabolism;
																gi11761629	aLTDMPQMR	2	1	HCD	N-Term(iTRAQ4plex)	12.1896	3.58472	1	1	17103	Unique	Used	1.44198	2	603.81	1206.61	3.0219	30.5507	2483	2483	MS2	13/16	Plasma_iTRAQ_2.raw
																gi11761629	aLTDMPqMR	2	1	HCD	N-Term(iTRAQ4plex), Q7(Deamidated)	17.2762	3.5061	1	1	14494	Unique	Used	1.13953	2	604.299	1207.59	-1.43429	35.6817	3094	3094	MS2	13/16	Plasma_iTRAQ_4.raw
																gi11761629	aLTDMPQMR	2	1	HCD	N-Term(iTRAQ4plex)	24.0136	3.47609	1	1	17149	Unique	Used	1.43838	1	1206.61	1206.61	2.78013	30.9367	2532	2532	MS2	11/16	Plasma_iTRAQ_2.raw
																gi11761629	aLTDMPQMR	2	1	HCD	N-Term(iTRAQ4plex)	4.68625	3.41313	1	1	11923	Unique	Used	1.57202	2	603.808	1206.61	-0.215465	43.2006	2825	2825	MS2	13/16	Plasma_iTRAQ_1_3.raw
																gi11761629	dSDWPFcSDEDWNYk	2	1	HCD	N-Term(iTRAQ4plex), C7(Methylthio), K15(iTRAQ4plex)	87.6684	5.68339	1	1	21089	Unique	Used	1.84865	3	747.642	2240.91	-0.865539	67.5385	6852	6852	MS2	19/56	Plasma_iTRAQ_3.raw
																gi11761629	dSDWPFcSDEDWNYk	2	1	HCD	N-Term(iTRAQ4plex), C7(Methylthio), K15(iTRAQ4plex)	120.182	4.96225	1	1	21090	Unique	Used	2.88242	2	1120.96	2240.92	0.529535	67.5449	6853	6853	MS2	17/28	Plasma_iTRAQ_3.raw
																gi11761629	dSHSLTTNImEILR	2	1	HCD	N-Term(iTRAQ4plex), M10(Oxidation)	30.4079	5.95414	1	1	16505	Unique	Used	1.27584	3	597.313	1789.92	-0.120865	56.5729	5289	5289	MS2	22/52	Plasma_iTRAQ_4.raw
																gi11761629	eSSSHHPGIAEFPSR	2	1	HCD	N-Term(iTRAQ4plex)	33.4871	4.44914	1	1	9818	Unique	Used	1.33068	3	594.628	1781.87	-0.260409	26.2121	1600	1600	MS2	22/56	Plasma_iTRAQ_4_6.raw
																gi11761629	eVDLkDYEDQQk	2	1	HCD	N-Term(iTRAQ4plex), K5(iTRAQ4plex), K12(iTRAQ4plex)	45.5019	5.38883	1	1	13641	Unique	Used	1.47358	2	971.51	1942.01	-0.0645302	25.7603	1762	1762	MS2	20/22	Plasma_iTRAQ_6.raw
																gi11761629	eVDLkDYEDqQk	2	1	HCD	N-Term(iTRAQ4plex), K5(iTRAQ4plex), Q10(Deamidated), K12(iTRAQ4plex)	35.4298	5.01575	1	1	13749	Unique	Used	1.4283	2	972.003	1943	0.937003	26.9116	1888	1888	MS2	21/22	Plasma_iTRAQ_6.raw
																gi11761629	eVDLkDYEDQQk	2	1	HCD	N-Term(iTRAQ4plex), K5(iTRAQ4plex), K12(iTRAQ4plex)	32.7616	4.97467	1	1	13672	Unique	Used	1.3886	2	971.512	1942.02	1.88405	27.9047	2207	2207	MS2	20/22	Plasma_iTRAQ_4.raw
																gi11761629	eVVTSEDGSDcPEAMDLGTLSGIGTLDGFR	2	1	HCD	N-Term(iTRAQ4plex), C11(Methylthio)	114.088	5.11728	1	1	18083	Unique	Used	1.11883	3	1087.83	3261.47	-0.089682	77.0165	7074	7074	MS2	24/116	Plasma_iTRAQ_4.raw
																gi11761629	gDSTFESk	2	1	HCD	N-Term(iTRAQ4plex), K8(iTRAQ4plex)	37.7068	3.22147	1	1	15941	Unique	Used	1.43422	2	579.798	1158.59	0.582964	19.5029	1213	1213	MS2	14/14	Plasma_iTRAQ_3.raw
																gi11761629	gDSTFESk	2	1	HCD	N-Term(iTRAQ4plex), K8(iTRAQ4plex)	33.1409	3.17765	1	1	10425	Unique	Used	1.36697	2	579.797	1158.59	-1.73499	19.6814	1188	1188	MS2	14/14	Plasma_iTRAQ_1_3.raw
																gi11761629	gGSTSYGTGSETESPR	2	1	HCD	N-Term(iTRAQ4plex)	87.7042	4.93221	1	1	10365	Unique	Used	1.29624	2	858.895	1716.78	1.48746	18.7675	1123	1123	MS2	26/30	Plasma_iTRAQ_1_3.raw
																gi11761629	gLIDEVNQDFTNR	2	1	HCD	N-Term(iTRAQ4plex)	47.5994	5.12014	1	1	19576	Unique	Used	1.39637	2	832.923	1664.84	1.25421	53.2145	5170	5170	MS2	21/24	Plasma_iTRAQ_2.raw
																gi11761629	gLIDEVnQDFTNR	2	1	HCD	N-Term(iTRAQ4plex), N7(Deamidated)	32.3434	5.05742	1	1	15680	Unique	Used	1.72498	2	833.415	1665.82	1.61554	47.9281	4387	4387	MS2	20/24	Plasma_iTRAQ_4.raw
																gi11761629	gLIDEVNQDFTNR	2	1	HCD	N-Term(iTRAQ4plex)	33.6872	5.01929	1	1	16480	Unique	Used	1.32571	2	832.922	1664.84	0.740957	56.3519	5263	5263	MS2	21/24	Plasma_iTRAQ_4.raw
																gi11761629	gLIDEVNQDFTNR	2	1	HCD	N-Term(iTRAQ4plex)	67.6304	4.58558	1	1	16499	Unique	Used	1.15114	3	555.617	1664.84	-0.330299	56.5269	5283	5283	MS2	17/48	Plasma_iTRAQ_4.raw
																gi11761629	gSESGIFTNTk	2	1	HCD	N-Term(iTRAQ4plex), K11(iTRAQ4plex)	46.233	5.47527	1	1	16195	Unique	Used	1.09702	2	714.885	1428.76	3.19936	21.9343	1487	1487	MS2	19/20	Plasma_iTRAQ_3.raw
																gi11761629	gSESGIFTNTk	2	1	HCD	N-Term(iTRAQ4plex), K11(iTRAQ4plex)	59.1706	5.33874	1	1	13087	Unique	Used	1.44903	2	714.882	1428.76	-0.389033	22.4999	1569	1569	MS2	20/20	Plasma_iTRAQ_4.raw
																gi11761629	gSESGIFTNTk	2	1	HCD	N-Term(iTRAQ4plex), K11(iTRAQ4plex)	45.5046	5.27193	1	1	11176	Unique	Used	1.40911	2	714.883	1428.76	1.23429	31.5465	2009	2009	MS2	19/20	Plasma_iTRAQ_1_3.raw
																gi11761629	gSESGIFTnTk	2	1	HCD	N-Term(iTRAQ4plex), N9(Deamidated), K11(iTRAQ4plex)	49.743	4.83291	1	1	16270	Unique	Used	1.5112	2	715.373	1429.74	-1.50374	23.2795	1583	1583	MS2	17/20	Plasma_iTRAQ_2.raw
																gi11761629	gSESGIFTnTk	2	1	HCD	N-Term(iTRAQ4plex), N9(Deamidated), K11(iTRAQ4plex)	47.1071	4.61185	1	1	13159	Unique	Used	1.42001	2	715.374	1429.74	-0.991465	23.0726	1646	1646	MS2	18/20	Plasma_iTRAQ_4.raw
																gi11761629	gSESGIFTnTk	2	1	HCD	N-Term(iTRAQ4plex), N9(Deamidated), K11(iTRAQ4plex)	59.5214	4.45752	1	1	16268	Unique	Used	1.45151	2	715.377	1429.75	4.21666	22.4999	1565	1565	MS2	19/20	Plasma_iTRAQ_3.raw
																gi11761629	gSESGIFTnTk	2	1	HCD	N-Term(iTRAQ4plex), N9(Deamidated), K11(iTRAQ4plex)	31.2152	4.27945	1	1	16371	Unique	Used	2.02943	2	715.376	1429.75	2.76522	23.5119	1681	1681	MS2	18/20	Plasma_iTRAQ_3.raw
																gi11761629	gSESGIFTnTk	2	1	HCD	N-Term(iTRAQ4plex), N9(Deamidated), K11(iTRAQ4plex)	55.2284	3.88417	1	1	13317	Unique	Used	1.42761	2	715.375	1429.74	0.88688	24.3906	1815	1815	MS2	18/20	Plasma_iTRAQ_4.raw
																gi11761629	hPDEAAFFDTASTGk	2	1	HCD	N-Term(iTRAQ4plex), K15(iTRAQ4plex)	59.3458	6.23036	1	1	10867	Unique	Used	1.59151	3	627.979	1881.92	-0.33708	43.9815	2828	2828	MS2	24/56	Plasma_iTRAQ_4_6.raw
																gi11761629	hPDEAAFFDTASTGk	2	1	HCD	N-Term(iTRAQ4plex), K15(iTRAQ4plex)	36.4367	5.92959	1	1	12460	Unique	Used	1.55436	3	627.979	1881.92	0.149405	70.087	4665	4665	MS2	21/56	Plasma_iTRAQ_4_6.raw
																gi11761629	hPDEAAFFDTASTGk	2	1	HCD	N-Term(iTRAQ4plex), K15(iTRAQ4plex)	103.46	5.86466	1	1	14004	Unique	Used	1.50603	2	941.462	1881.92	-3.05426	29.1272	2171	2171	MS2	21/28	Plasma_iTRAQ_6.raw
																gi11761629	hPDEAAFFDTASTGk	2	1	HCD	N-Term(iTRAQ4plex), K15(iTRAQ4plex)	56.6235	5.82544	1	1	9342	Unique	Used	1.33384	3	627.979	1881.92	0.052108	17.5269	1007	1007	MS2	21/56	Plasma_iTRAQ_4_6.raw
																gi11761629	hPDEAAFFDTASTGk	2	1	HCD	N-Term(iTRAQ4plex), K15(iTRAQ4plex)	110.051	5.55532	1	1	14331	Unique	Used	1.74788	2	941.467	1881.93	1.94033	33.9011	2915	2915	MS2	21/28	Plasma_iTRAQ_4.raw
																gi11761629	hPDEAAFFDTASTGk	2	1	HCD	N-Term(iTRAQ4plex), K15(iTRAQ4plex)	94.0346	5.26707	1	1	13965	Unique	Used	1.46751	2	941.471	1881.94	7.06459	28.7965	2128	2128	MS2	20/28	Plasma_iTRAQ_6.raw
																gi11761629	hPDEAAFFDTASTGk	2	1	HCD	N-Term(iTRAQ4plex), K15(iTRAQ4plex)	43.448	5.00839	1	1	14028	Unique	Used	1.80705	3	627.978	1881.92	-1.79654	29.3439	2198	2198	MS2	23/56	Plasma_iTRAQ_6.raw
																gi11761629	hPDEAAFFDTASTGk	2	1	HCD	N-Term(iTRAQ4plex), K15(iTRAQ4plex)	84.983	4.87014	1	1	12433	Unique	Used	1.51974	2	941.467	1881.93	2.26465	69.6443	4633	4633	MS2	20/28	Plasma_iTRAQ_4_6.raw
																gi11761629	hPDEAAFFDTASTGk	2	1	HCD	N-Term(iTRAQ4plex), K15(iTRAQ4plex)	47.171	4.62511	1	1	14325	Unique	Used	1.72736	3	627.981	1881.93	3.3602	33.8592	2909	2909	MS2	21/56	Plasma_iTRAQ_4.raw
																gi11761629	hPDEAAFFDTASTGk	2	1	HCD	N-Term(iTRAQ4plex), K15(iTRAQ4plex)	47.6121	4.4466	1	1	9256	Unique	Used	1.21862	3	627.98	1881.92	1.02508	15.9761	901	901	MS2	20/56	Plasma_iTRAQ_4_6.raw
																gi11761629	hPDEAAFFDTASTGk	2	1	HCD	N-Term(iTRAQ4plex), K15(iTRAQ4plex)	55.1306	4.00239	1	1	14158	Unique	Used	1.00065	3	627.979	1881.92	-0.045189	30.5742	2345	2345	MS2	22/56	Plasma_iTRAQ_6.raw
																gi11761629	hPDEAAFFDTASTGk	2	1	HCD	N-Term(iTRAQ4plex), K15(iTRAQ4plex)	15.7958	3.95793	1	1	13782	Unique	Used	1.0462	3	627.98	1881.93	2.28993	27.2046	1925	1925	MS2	19/56	Plasma_iTRAQ_6.raw
																gi11761629	hPDEAAFFDTASTGk	2	1	HCD	N-Term(iTRAQ4plex), K15(iTRAQ4plex)	16.0991	3.8689	1	1	14174	Unique	Used	1.20064	2	941.472	1881.94	7.32405	30.6994	2362	2362	MS2	13/28	Plasma_iTRAQ_6.raw
																gi11761629	hPDEAAFFDTASTGk	2	1	HCD	N-Term(iTRAQ4plex), K15(iTRAQ4plex)	27.1141	3.70102	1	1	10948	Unique	Used	1.33977	3	627.978	1881.92	-0.920863	45.3656	2923	2923	MS2	18/56	Plasma_iTRAQ_4_6.raw
																gi11761629	hRHPDEAAFFDTASTGk	2	1	HCD	N-Term(iTRAQ4plex), K17(iTRAQ4plex)	65.2425	7.25852	1	1	7355	Unique	Used	1.32316	2	1088.05	2175.09	2.52256	23.63	1479	1479	MS2	23/32	Plasma_iTRAQ_8.raw
																gi11761629	hRHPDEAAFFDTASTGk	2	1	HCD	N-Term(iTRAQ4plex), K17(iTRAQ4plex)	78.6906	7.1362	1	1	7343	Unique	Used	0.927454	3	725.7	2175.09	1.67455	23.4143	1461	1461	MS2	23/64	Plasma_iTRAQ_8.raw
																gi11761629	hRHPDEAAFFDTASTGk	2	1	HCD	N-Term(iTRAQ4plex), K17(iTRAQ4plex)	67.5766	6.38643	1	1	7411	Unique	Used	0.928988	3	725.693	2175.06	-8.42751	24.3225	1547	1547	MS2	25/64	Plasma_iTRAQ_8.raw
																gi11761629	lEVDIDIk	2	1	HCD	N-Term(iTRAQ4plex), K8(iTRAQ4plex)	15.5001	3.58712	1	1	19043	Unique	Used	1.36111	2	616.87	1232.73	-1.39519	48.2119	4606	4606	MS2	13/14	Plasma_iTRAQ_3.raw
																gi11761629	mELERPGGNEITR	2	1	HCD	N-Term(iTRAQ4plex)	28.3817	3.84875	1	1	13268	Unique	Used	0.766313	2	823.429	1645.85	3.40685	24.0245	1763	1763	MS2	14/24	Plasma_iTRAQ_4.raw
																gi11761629	mELERPGGnEITR	2	1	HCD	N-Term(iTRAQ4plex), N9(Deamidated)	4.88193	3.39329	1	1	13619	Unique	Used	1.15613	2	823.92	1646.83	2.80744	27.4069	2149	2149	MS2	14/24	Plasma_iTRAQ_4.raw
																gi11761629	mkPVPDLVPGNFk	2	1	HCD	N-Term(iTRAQ4plex), M1(Oxidation), K2(iTRAQ4plex), K13(iTRAQ4plex)	17.8754	3.97831	1	1	14981	Unique	Used	1.20001	3	630.701	1890.09	-0.464406	40.6863	3624	3624	MS2	19/48	Plasma_iTRAQ_4.raw
																gi11761629	nPSSAGSWnSGSSGPGSTGnR	2	1	HCD	N-Term(iTRAQ4plex), N9(Deamidated), N20(Deamidated)	132.68	6.74152	1	1	12934	Unique	Used	1.58079	2	1055.47	2109.93	6.21357	21.1701	1403	1403	MS2	28/40	Plasma_iTRAQ_4.raw
																gi11761629	nPSSAGSWnSGSSGPGSTGNR	2	1	HCD	N-Term(iTRAQ4plex), N9(Deamidated)	117.291	6.69245	1	1	12812	Unique	Used	1.59403	2	1054.97	2108.93	-0.0892622	20.1946	1272	1272	MS2	27/40	Plasma_iTRAQ_4.raw
																gi11761629	nPSSAGSWNSGSSGPGSTGNR	2	1	HCD	N-Term(iTRAQ4plex)	96.428	6.40673	1	1	12774	Unique	Used	1.72303	2	1054.48	2107.95	1.24603	19.8635	1230	1230	MS2	26/40	Plasma_iTRAQ_4.raw
																gi11761629	nSLFEYQk	2	1	HCD	N-Term(iTRAQ4plex), N1(Deamidated), K8(iTRAQ4plex)	34.3465	3.98743	1	1	17492	Unique	Used	1.39026	2	659.351	1317.7	1.67919	33.9462	2902	2902	MS2	14/14	Plasma_iTRAQ_2.raw
																gi11761629	nSLFEYQk	2	1	HCD	N-Term(iTRAQ4plex), N1(Deamidated), K8(iTRAQ4plex)	30.6547	3.9085	1	1	17577	Unique	Used	1.24336	2	659.35	1317.69	0.2896	34.8168	2995	2995	MS2	14/14	Plasma_iTRAQ_2.raw
																gi11761629	nSLFEYQk	2	1	HCD	N-Term(iTRAQ4plex), K8(iTRAQ4plex)	34.0513	3.84438	1	1	16912	Unique	Used	1.42853	2	658.858	1316.71	0.0171666	27.8372	2261	2261	MS2	14/14	Plasma_iTRAQ_3.raw
																gi11761629	nSLFEYQk	2	1	HCD	N-Term(iTRAQ4plex), N1(Deamidated), K8(iTRAQ4plex)	21.8471	3.77039	1	1	17516	Unique	Used	1.31409	2	659.35	1317.69	0.382239	33.6289	2927	2927	MS2	13/14	Plasma_iTRAQ_3.raw
																gi11761629	nSLFEYQk	2	1	HCD	N-Term(iTRAQ4plex), N1(Deamidated), K8(iTRAQ4plex)	33.7557	3.75163	1	1	17614	Unique	Used	1.30056	2	659.352	1317.7	2.8835	34.523	3033	3033	MS2	14/14	Plasma_iTRAQ_3.raw
																gi11761629	nSLFEYQk	2	1	HCD	N-Term(iTRAQ4plex), K8(iTRAQ4plex)	33.1305	3.61535	1	1	11859	Unique	Used	1.34591	2	658.857	1316.71	-1.55888	42.196	2755	2755	MS2	13/14	Plasma_iTRAQ_1_3.raw
																gi11761629	nSLFEYQk	2	1	HCD	N-Term(iTRAQ4plex), K8(iTRAQ4plex)	30.808	3.61319	1	1	11937	Unique	Used	1.5027	2	658.858	1316.71	0.0171666	43.41	2840	2840	MS2	13/14	Plasma_iTRAQ_1_3.raw
																gi11761629	nSLFEYQk	2	1	HCD	N-Term(iTRAQ4plex), N1(Deamidated), K8(iTRAQ4plex)	10.4262	3.60202	1	1	12127	Unique	Used	1.18347	2	659.35	1317.69	-0.173597	46.4466	3051	3051	MS2	12/14	Plasma_iTRAQ_1_3.raw
																gi11761629	nSLFEYQk	2	1	HCD	N-Term(iTRAQ4plex), K8(iTRAQ4plex)	28.6654	3.58099	1	1	17007	Unique	Used	1.22841	2	658.857	1316.71	-2.20785	28.7	2364	2364	MS2	14/14	Plasma_iTRAQ_3.raw
																gi11761629	nSLFEYQk	2	1	HCD	N-Term(iTRAQ4plex), K8(iTRAQ4plex)	30.9553	3.55849	1	1	14134	Unique	Used	1.47546	2	658.858	1316.71	-0.724503	32.0756	2703	2703	MS2	13/14	Plasma_iTRAQ_4.raw
																gi11761629	nSLFEYQk	2	1	HCD	N-Term(iTRAQ4plex), N1(Deamidated), K8(iTRAQ4plex)	37.027	3.48547	1	1	12048	Unique	Used	1.28348	2	659.349	1317.69	-1.28527	45.2029	2964	2964	MS2	13/14	Plasma_iTRAQ_1_3.raw
																gi11761629	nSLFEYQk	2	1	HCD	N-Term(iTRAQ4plex), N1(Deamidated), K8(iTRAQ4plex)	21.0195	3.44981	1	1	14532	Unique	Used	1.18941	2	659.351	1317.69	0.938075	36.1138	3136	3136	MS2	13/14	Plasma_iTRAQ_4.raw
																gi11761629	qFTSSTSYNR	2	1	HCD	N-Term(iTRAQ4plex)	8.62755	3.56476	1	1	13261	Unique	Used	1.20297	2	667.827	1334.65	1.15393	21.3455	1307	1307	MS2	13/18	Plasma_iTRAQ_6.raw
																gi11761629	qFTSSTSYNR	2	1	HCD	N-Term(iTRAQ4plex)	15.7434	3.49493	1	1	16028	Unique	Used	1.34935	2	667.827	1334.65	0.879547	21.1052	1320	1320	MS2	15/18	Plasma_iTRAQ_2.raw
																gi11761629	qLEQVIAk	2	1	HCD	N-Term(iTRAQ4plex), K8(iTRAQ4plex)	29.2146	4.04415	1	1	16543	Unique	Used	1.36017	2	608.879	1216.75	-0.070319	24.8961	1866	1866	MS2	13/14	Plasma_iTRAQ_3.raw
																gi11761629	qLEQVIAk	2	1	HCD	N-Term(iTRAQ4plex), K8(iTRAQ4plex)	24.0784	3.84959	1	1	13553	Unique	Used	1.51454	2	608.877	1216.75	-3.38105	26.7997	2078	2078	MS2	14/14	Plasma_iTRAQ_4.raw
																gi11761629	qLEQVIAk	2	1	HCD	N-Term(iTRAQ4plex), K8(iTRAQ4plex)	25.973	3.82178	1	1	11478	Unique	Used	1.49957	2	608.879	1216.75	-0.270969	36.2445	2339	2339	MS2	13/14	Plasma_iTRAQ_1_3.raw
																gi11761629	qLEQVIAk	2	1	HCD	N-Term(iTRAQ4plex), K8(iTRAQ4plex)	26.1005	3.76547	1	1	13695	Unique	Used	1.29711	2	608.88	1216.75	1.33423	28.1065	2232	2232	MS2	13/14	Plasma_iTRAQ_4.raw
																gi11761629	qLEqVIAk	2	1	HCD	N-Term(iTRAQ4plex), Q4(Deamidated), K8(iTRAQ4plex)	22.145	3.58866	1	1	16753	Unique	Used	1.3124	2	609.37	1217.73	-1.07862	26.5853	2091	2091	MS2	14/14	Plasma_iTRAQ_3.raw
																gi11761629	qLEQVIAk	2	1	HCD	N-Term(iTRAQ4plex), K8(iTRAQ4plex)	25.2665	3.29164	1	1	16654	Unique	Used	1.05864	2	608.876	1216.75	-3.983	25.7975	1985	1985	MS2	14/14	Plasma_iTRAQ_3.raw
																gi11761629	rLEVDIDIk	2	1	HCD	N-Term(iTRAQ4plex), K9(iTRAQ4plex)	22.8923	4.49784	1	1	11150	Unique	Used	1.37995	3	463.617	1388.84	1.37777	48.8399	3160	3160	MS2	17/32	Plasma_iTRAQ_4_6.raw
																gi11761629	rLEVDIDIk	2	1	HCD	N-Term(iTRAQ4plex), K9(iTRAQ4plex)	8.77904	4.16293	1	1	12638	Unique	Used	1.26588	3	463.616	1388.83	-0.467999	72.7361	4864	4864	MS2	18/32	Plasma_iTRAQ_4_6.raw
																gi11761629	rLEVDIDIk	2	1	HCD	N-Term(iTRAQ4plex), K9(iTRAQ4plex)	13.2598	4.12993	1	1	15638	Unique	Used	1.22759	3	463.621	1388.85	8.56304	45.6135	4047	4047	MS2	16/32	Plasma_iTRAQ_6.raw
																gi11761629	rLEVDIDIk	2	1	HCD	N-Term(iTRAQ4plex), K9(iTRAQ4plex)	12.8516	4.05846	1	1	15203	Unique	Used	1.3387	3	463.618	1388.84	2.23474	40.7481	3532	3532	MS2	19/32	Plasma_iTRAQ_6.raw
																gi11761629	rLEVDIDIk	2	1	HCD	N-Term(iTRAQ4plex), K9(iTRAQ4plex)	13.7142	3.8501	1	1	15003	Unique	Used	0.713818	3	463.617	1388.84	1.50961	38.6974	3301	3301	MS2	15/32	Plasma_iTRAQ_6.raw
																gi11761629	rLEVDIDIk	2	1	HCD	N-Term(iTRAQ4plex), K9(iTRAQ4plex)	8.37482	3.04412	1	1	12675	Unique	Used	1.29151	2	694.922	1388.84	0.926013	73.245	4905	4905	MS2	15/16	Plasma_iTRAQ_4_6.raw
																gi11761629	tFPGFFSPMLGEFVSETESR	2	1	HCD	N-Term(iTRAQ4plex)	121.22	6.57958	1	1	22023	Unique	Used	1.50776	2	1205.08	2409.16	0.46383	76.7615	7856	7856	MS2	22/38	Plasma_iTRAQ_2.raw
																gi11761629	tFPGFFSPMLGEFVSETESR	2	1	HCD	N-Term(iTRAQ4plex)	118.903	6.49897	1	1	21969	Unique	Used	1.48032	2	1205.08	2409.15	-0.448218	76.8378	7845	7845	MS2	23/38	Plasma_iTRAQ_3.raw
																gi11761629	tFPGFFSPmLGEFVSETESR	2	1	HCD	N-Term(iTRAQ4plex), M9(Oxidation)	110.713	6.46572	1	1	21793	Unique	Used	1.21284	3	809.056	2425.15	1.6963	75.2009	7649	7649	MS2	25/76	Plasma_iTRAQ_3.raw
																gi11761629	tFPGFFSPmLGEFVSETESR	2	1	HCD	N-Term(iTRAQ4plex), M9(Oxidation)	104.685	6.35311	1	1	21777	Unique	Used	1.38295	3	809.057	2425.16	1.99831	74.2627	7580	7580	MS2	22/76	Plasma_iTRAQ_2.raw
																gi11761629	tFPGFFSPMLGEFVSETESR	2	1	HCD	N-Term(iTRAQ4plex)	80	6.31769	1	1	22026	Unique	Used	1.95642	3	803.725	2409.16	1.97833	76.8057	7860	7860	MS2	28/76	Plasma_iTRAQ_2.raw
																gi11761629	tFPGFFSPMLGEFVSETESR	2	1	HCD	N-Term(iTRAQ4plex)	73.5898	6.21066	1	1	21967	Unique	Used	1.45628	3	803.724	2409.16	1.4463	76.8264	7843	7843	MS2	26/76	Plasma_iTRAQ_3.raw
																gi11761629	tFPGFFSPmLGEFVSETESR	2	1	HCD	N-Term(iTRAQ4plex), M9(Oxidation)	103.063	6.00242	1	1	21852	Unique	Used	1.50303	3	809.057	2425.16	1.92281	75.1641	7667	7667	MS2	25/76	Plasma_iTRAQ_2.raw
																gi11761629	tFPGFFSPMLGEFVSETESR	2	1	HCD	N-Term(iTRAQ4plex)	72.5666	5.34585	1	1	14084	Unique	Used	1.33653	3	803.725	2409.16	1.82632	76.9667	5199	5199	MS2	23/76	Plasma_iTRAQ_1_3.raw
																gi11761629	tFPGFFSPmLGEFVSETESR	2	1	HCD	N-Term(iTRAQ4plex), M9(Oxidation)	82.5796	4.8744	1	1	21797	Unique	Used	1.35298	2	1213.08	2425.15	-0.26122	75.2248	7653	7653	MS2	21/38	Plasma_iTRAQ_3.raw
																gi11761629	tFPGFFSPmLGEFVSETESR	2	1	HCD	N-Term(iTRAQ4plex), M9(Oxidation)	88.5488	4.86635	1	1	21788	Unique	Used	1.52358	2	1213.08	2425.15	-0.16055	74.3755	7592	7592	MS2	18/38	Plasma_iTRAQ_2.raw
																gi11761629	tFPGFFSPmLGEFVSETESR	2	1	HCD	N-Term(iTRAQ4plex), M9(Oxidation)	108.813	4.34249	1	1	21860	Unique	Used	1.45993	2	1213.08	2425.15	0.342802	75.2601	7676	7676	MS2	18/38	Plasma_iTRAQ_2.raw
																gi11761629	tVIGPDGHk	2	1	HCD	N-Term(iTRAQ4plex), K9(iTRAQ4plex)	29.4925	4.7655	1	1	13082	Unique	Used	1.34162	3	404.571	1211.7	-1.36353	18.5626	1102	1102	MS2	23/32	Plasma_iTRAQ_6.raw
																gi11761629	tVIGPDGHk	2	1	HCD	N-Term(iTRAQ4plex), K9(iTRAQ4plex)	37.5462	4.44482	1	1	11835	Unique	Used	1.23194	3	404.569	1211.69	-5.36809	60.0465	3946	3946	MS2	22/32	Plasma_iTRAQ_4_6.raw
																gi11761629	tVIGPDGHk	2	1	HCD	N-Term(iTRAQ4plex), K9(iTRAQ4plex)	33.9777	4.37645	1	1	9424	Unique	Used	1.14338	3	404.57	1211.7	-2.64801	18.913	1104	1104	MS2	20/32	Plasma_iTRAQ_4_6.raw
																gi11761629	tVIGPDGHk	2	1	HCD	N-Term(iTRAQ4plex), K9(iTRAQ4plex)	12.9671	3.07188	1	1	13091	Unique	Used	1.45127	2	606.352	1211.7	-0.92427	18.7059	1112	1112	MS2	14/16	Plasma_iTRAQ_6.raw
																gi11761629	vQHIqLLQk	2	1	HCD	N-Term(iTRAQ4plex), Q5(Deamidated), K9(iTRAQ4plex)	14.8345	5.26108	1	1	12533	Unique	Used	1.5432	3	465.956	1395.85	-1.81318	71.2057	4748	4748	MS2	16/32	Plasma_iTRAQ_4_6.raw
																gi11761629	vQHIQLLQk	2	1	HCD	N-Term(iTRAQ4plex), K9(iTRAQ4plex)	24.2325	4.90476	1	1	12474	Unique	Used	1.40073	3	465.629	1394.87	0.947391	70.2892	4681	4681	MS2	17/32	Plasma_iTRAQ_4_6.raw
																gi11761629	vQHIQLLQk	2	1	HCD	N-Term(iTRAQ4plex), K9(iTRAQ4plex)	33.4213	4.89212	1	1	10613	Unique	Used	1.42645	3	465.629	1394.87	0.816121	39.5156	2519	2519	MS2	16/32	Plasma_iTRAQ_4_6.raw
																gi11761629	vQHIQLLqk	2	1	HCD	N-Term(iTRAQ4plex), Q8(Deamidated), K9(iTRAQ4plex)	10.6849	4.27088	1	1	10759	Unique	Used	1.31593	3	465.957	1395.86	0.548024	42.056	2694	2694	MS2	15/32	Plasma_iTRAQ_4_6.raw
																gi11761629	vQHIQLLQk	2	1	HCD	N-Term(iTRAQ4plex), K9(iTRAQ4plex)	26.307	4.21163	1	1	10687	Unique	Used	1.23842	3	465.63	1394.88	3.17898	40.765	2606	2606	MS2	15/32	Plasma_iTRAQ_4_6.raw
																gi11761629	vQHIQLLQk	2	1	HCD	N-Term(iTRAQ4plex), K9(iTRAQ4plex)	45.9844	4.16397	1	1	10630	Unique	Used	1.29304	2	697.94	1394.87	0.278801	39.7771	2538	2538	MS2	15/16	Plasma_iTRAQ_4_6.raw
																gi11761629	vQHIQLLQk	2	1	HCD	N-Term(iTRAQ4plex), K9(iTRAQ4plex)	18.8664	3.83786	1	1	13390	Unique	Used	0.710544	3	465.628	1394.87	-2.26874	25.0242	1894	1894	MS2	17/32	Plasma_iTRAQ_4.raw
gi118582275	SOD3	6649	superoxide dismutase 3, extracellular precursor	240	25.8	12.08	3	2	0.462	43.6122	S		Extracellular	Superoxide dismutase activity;	Metabolism; Energy pathways;
																gi118582275	aGLAASLAGPHSIVGR	1	1	HCD	N-Term(iTRAQ4plex)	61.9722	6.32212	1	1	14249	Unique	Used	0.53078	2	810.971	1620.94	3.12538	31.3264	2444	2444	MS2	23/30	Plasma_iTRAQ_6.raw
																gi118582275	aGLAASLAGPHSIVGR	1	1	HCD	N-Term(iTRAQ4plex)	19.9488	5.60845	1	1	14267	Unique	Used	0.687634	3	540.983	1620.93	1.72387	31.4867	2464	2464	MS2	29/60	Plasma_iTRAQ_6.raw
																gi118582275	aVVVHAGEDDLGR	1	1	HCD	N-Term(iTRAQ4plex)	49.743	5.21815	1	1	12973	Unique	Used	0.319349	3	494.598	1481.78	-1.38811	21.2779	1371	1371	MS2	22/48	Plasma_iTRAQ_5.raw
gi119392081	CFI	3426	complement factor I preproprotein	583	65.7	44.94	92	20	1.467	14.6828	S		Extracellular	Complement activity;	Immune response;
																gi119392081	acDGINDcGDQSDELcck	1	1	HCD	N-Term(iTRAQ4plex), C2(Methylthio), C8(Methylthio), C16(Methylthio), C17(Methylthio), K18(iTRAQ4plex)	154.775	6.23936	1	1	20584	Unique	Used	4.52017	2	1180.92	2360.84	1.23935	62.5753	6291	6291	MS2	25/34	Plasma_iTRAQ_3.raw
																gi119392081	acDGInDcGDQSDELcck	1	1	HCD	N-Term(iTRAQ4plex), C2(Methylthio), N6(Deamidated), C8(Methylthio), C16(Methylthio), C17(Methylthio), K18(iTRAQ4plex)	140.515	6.02449	1	1	20738	Unique	Used	3.91356	2	1181.41	2361.82	0.56388	64.1543	6465	6465	MS2	24/34	Plasma_iTRAQ_3.raw
																gi119392081	acDGINDcGDQSDELcck	1	1	HCD	N-Term(iTRAQ4plex), C2(Methylthio), C8(Methylthio), C16(Methylthio), C17(Methylthio), K18(iTRAQ4plex)	114.305	5.49493	1	1	20566	Unique	Used	3.04426	3	787.619	2360.84	2.52631	62.4119	6271	6271	MS2	25/68	Plasma_iTRAQ_3.raw
																gi119392081	acDGInDcGDQSDELcck	1	1	HCD	N-Term(iTRAQ4plex), C2(Methylthio), N6(Deamidated), C8(Methylthio), C16(Methylthio), C17(Methylthio), K18(iTRAQ4plex)	93.5048	5.42101	1	1	20742	Unique	Used	1.68326	3	787.946	2361.82	1.51435	64.2019	6470	6470	MS2	21/68	Plasma_iTRAQ_3.raw
																gi119392081	aDSPMDDFFQcVnGk	1	1	HCD	N-Term(iTRAQ4plex), C11(Methylthio), N13(Deamidated), K15(iTRAQ4plex)	107.61	6.18688	1	1	21807	Unique	Used	1.50704	2	1004.94	2008.87	1.18345	75.345	7665	7665	MS2	21/28	Plasma_iTRAQ_3.raw
																gi119392081	aDSPMDDFFQcVnGk	1	1	HCD	N-Term(iTRAQ4plex), C11(Methylthio), N13(Deamidated), K15(iTRAQ4plex)	92.1301	6.09774	1	1	21086	Unique	Used	1.67991	2	1004.94	2008.87	0.028904	67.5189	6849	6849	MS2	21/28	Plasma_iTRAQ_3.raw
																gi119392081	aDSPMDDFFQcVnGk	1	1	HCD	N-Term(iTRAQ4plex), C11(Methylthio), N13(Deamidated), K15(iTRAQ4plex)	92.5343	4.95651	1	1	21099	Unique	Used	1.69273	3	670.296	2008.87	1.41982	67.6417	6863	6863	MS2	25/56	Plasma_iTRAQ_3.raw
																gi119392081	aDSPmDDFFQcVnGk	1	1	HCD	N-Term(iTRAQ4plex), M5(Oxidation), C11(Methylthio), N13(Deamidated), K15(iTRAQ4plex)	77.1906	4.80151	1	1	20580	Unique	Used	1.25869	3	675.627	2024.87	1.62903	62.5277	6286	6286	MS2	21/56	Plasma_iTRAQ_3.raw
																gi119392081	aDSPmDDFFQcVnGk	1	1	HCD	N-Term(iTRAQ4plex), M5(Oxidation), C11(Methylthio), N13(Deamidated), K15(iTRAQ4plex)	87.3376	4.60079	1	1	19979	Unique	Used	1.46442	2	1012.94	2024.87	1.57538	56.9444	5630	5630	MS2	20/28	Plasma_iTRAQ_3.raw
																gi119392081	aDSPmDDFFQcVnGk	1	1	HCD	N-Term(iTRAQ4plex), M5(Oxidation), C11(Methylthio), N13(Deamidated), K15(iTRAQ4plex)	103.891	4.51724	1	1	20565	Unique	Used	1.3791	2	1012.93	2024.86	-3.18719	62.3772	6269	6269	MS2	17/28	Plasma_iTRAQ_3.raw
																gi119392081	aDSPMDDFFQcVnGk	1	1	HCD	N-Term(iTRAQ4plex), C11(Methylthio), N13(Deamidated), K15(iTRAQ4plex)	86.6359	4.44403	1	1	13737	Unique	Used	1.47551	2	1004.94	2008.87	0.515029	71.6997	4812	4812	MS2	20/28	Plasma_iTRAQ_1_3.raw
																gi119392081	aDSPMDDFFQcVnGk	1	1	HCD	N-Term(iTRAQ4plex), C11(Methylthio), N13(Deamidated), K15(iTRAQ4plex)	92.2355	4.44134	1	1	13872	Unique	Used	1.46226	2	1004.94	2008.87	-0.457222	73.8468	4962	4962	MS2	19/28	Plasma_iTRAQ_1_3.raw
																gi119392081	aDSPmDDFFQcVnGk	1	1	HCD	N-Term(iTRAQ4plex), M5(Oxidation), C11(Methylthio), N13(Deamidated), K15(iTRAQ4plex)	73.7508	4.35505	1	1	19987	Unique	Used	1.56682	3	675.627	2024.87	0.9056	57.0335	5639	5639	MS2	25/56	Plasma_iTRAQ_3.raw
																gi119392081	aDSPMDDFFQcVnGk	1	1	HCD	N-Term(iTRAQ4plex), C11(Methylthio), N13(Deamidated), K15(iTRAQ4plex)	63.5111	4.01944	1	1	21802	Unique	Used	1.31437	3	670.296	2008.87	1.41982	75.2915	7659	7659	MS2	23/56	Plasma_iTRAQ_3.raw
																gi119392081	aDSPMDDFFQcVnGk	1	1	HCD	N-Term(iTRAQ4plex), C11(Methylthio), N13(Deamidated), K15(iTRAQ4plex)	67.7089	3.991	1	1	17993	Unique	Used	1.21085	3	670.296	2008.87	1.51097	75.9064	6971	6971	MS2	21/56	Plasma_iTRAQ_4.raw
																gi119392081	aDSPMDDFFQcVnGk	1	1	HCD	N-Term(iTRAQ4plex), C11(Methylthio), N13(Deamidated), K15(iTRAQ4plex)	20.8745	3.35541	1	1	13870	Unique	Used	1.06092	3	670.295	2008.87	0.143742	73.8174	4960	4960	MS2	12/56	Plasma_iTRAQ_1_3.raw
																gi119392081	aDSPMDDFFQcVnGk	1	1	HCD	N-Term(iTRAQ4plex), C11(Methylthio), N13(Deamidated), K15(iTRAQ4plex)	46.2362	3.34536	1	1	13722	Unique	Used	1.07587	3	670.296	2008.87	1.87556	71.4444	4795	4795	MS2	15/56	Plasma_iTRAQ_1_3.raw
																gi119392081	aQLGDLPWQVAIk	1	1	HCD	N-Term(iTRAQ4plex), K13(iTRAQ4plex)	57.6056	5.72293	1	1	16766	Unique	Used	1.30375	2	864.01	1727.01	2.17363	62.1105	5698	5698	MS2	20/24	Plasma_iTRAQ_5.raw
																gi119392081	aQLGDLPWQVAIk	1	1	HCD	N-Term(iTRAQ4plex), K13(iTRAQ4plex)	68.1985	5.61172	1	1	17419	Unique	Used	1.24742	2	864.01	1727.01	1.67885	67.7965	6310	6310	MS2	19/24	Plasma_iTRAQ_4.raw
																gi119392081	aQLGDLPWQVAIk	1	1	HCD	N-Term(iTRAQ4plex), K13(iTRAQ4plex)	56.3139	4.87309	1	1	17421	Unique	Used	1.3393	3	576.343	1727.01	2.3779	67.8216	6312	6312	MS2	22/48	Plasma_iTRAQ_4.raw
																gi119392081	aQLGDLPWQVAIk	1	1	HCD	N-Term(iTRAQ4plex), K13(iTRAQ4plex)	58.1752	4.57439	1	1	16771	Unique	Used	1.45531	3	576.341	1727.01	-0.166689	62.1683	5704	5704	MS2	22/48	Plasma_iTRAQ_5.raw
																gi119392081	eANVAcLDLGFQQGADTQR	1	1	HCD	N-Term(iTRAQ4plex), C6(Methylthio)	77.7626	6.77307	1	1	17123	Unique	Used	1.08946	3	742.687	2226.05	3.29379	63.9282	5975	5975	MS2	21/72	Plasma_iTRAQ_4.raw
																gi119392081	eANVAcLDLGFQQGADTQR	1	1	HCD	N-Term(iTRAQ4plex), C6(Methylthio)	55.3707	5.21032	1	1	17034	Unique	Used	2.69395	3	742.686	2226.04	1.07288	62.7516	5874	5874	MS2	21/72	Plasma_iTRAQ_4.raw
																gi119392081	eMEcAGTYDGSIDAck	1	1	HCD	N-Term(iTRAQ4plex), C4(Methylthio), C15(Methylthio), K16(iTRAQ4plex)	149.546	5.86447	1	1	19556	Unique	Used	2.21632	2	1036.92	2072.83	-0.057431	53.0451	5148	5148	MS2	22/30	Plasma_iTRAQ_2.raw
																gi119392081	eMEcAGTYDGSIDAck	1	1	HCD	N-Term(iTRAQ4plex), C4(Methylthio), C15(Methylthio), K16(iTRAQ4plex)	116.884	5.79884	1	1	19799	Unique	Used	2.14868	2	1036.92	2072.84	2.65153	55.116	5409	5409	MS2	21/30	Plasma_iTRAQ_2.raw
																gi119392081	emEcAGTYDGSIDAck	1	1	HCD	N-Term(iTRAQ4plex), M2(Oxidation), C4(Methylthio), C15(Methylthio), K16(iTRAQ4plex)	133.313	5.4006	1	1	18802	Unique	Used	2.38145	2	1044.92	2088.83	-0.895231	45.9388	4324	4324	MS2	21/30	Plasma_iTRAQ_2.raw
																gi119392081	eMEcAGTYDGSIDAck	1	1	HCD	N-Term(iTRAQ4plex), C4(Methylthio), C15(Methylthio), K16(iTRAQ4plex)	71.5169	4.79757	1	1	19523	Unique	Used	1.52061	3	691.617	2072.84	0.524987	52.7945	5113	5113	MS2	17/60	Plasma_iTRAQ_2.raw
																gi119392081	eMEcAGTYDGSIDAck	1	1	HCD	N-Term(iTRAQ4plex), C4(Methylthio), C15(Methylthio), K16(iTRAQ4plex)	110.44	3.58792	1	1	19895	Unique	Used	1.99865	3	691.617	2072.84	0.966665	55.9167	5512	5512	MS2	20/60	Plasma_iTRAQ_2.raw
																gi119392081	fLNnGTcTAEGk	1	1	HCD	N-Term(iTRAQ4plex), N4(Deamidated), C7(Methylthio), K12(iTRAQ4plex)	51.3875	4.49107	1	1	17779	Unique	Used	1.21644	2	795.381	1589.75	0.284302	35.8732	3209	3209	MS2	17/22	Plasma_iTRAQ_3.raw
																gi119392081	gLETSLAEcTFTk	1	1	HCD	N-Term(iTRAQ4plex), C9(Methylthio), K13(iTRAQ4plex)	66.2828	6.48362	1	1	13514	Unique	Used	1.4254	2	867.44	1733.87	2.27712	68.0061	4562	4562	MS2	20/24	Plasma_iTRAQ_1_3.raw
																gi119392081	gLETSLAEcTFTk	1	1	HCD	N-Term(iTRAQ4plex), C9(Methylthio), K13(iTRAQ4plex)	69.9512	6.3012	1	1	20341	Unique	Used	1.47224	2	867.44	1733.87	1.92511	60.2288	6022	6022	MS2	20/24	Plasma_iTRAQ_3.raw
																gi119392081	gLETSLAEcTFTk	1	1	HCD	N-Term(iTRAQ4plex), C9(Methylthio), K13(iTRAQ4plex)	66.0951	6.18388	1	1	20437	Unique	Used	1.38975	2	867.441	1733.87	2.62914	61.159	6128	6128	MS2	21/24	Plasma_iTRAQ_3.raw
																gi119392081	gLETSLAEcTFTk	1	1	HCD	N-Term(iTRAQ4plex), C9(Methylthio), K13(iTRAQ4plex)	70.5743	6.09368	1	1	17156	Unique	Used	1.44247	2	867.446	1733.89	9.24698	64.3787	6012	6012	MS2	20/24	Plasma_iTRAQ_4.raw
																gi119392081	gLETSLAEcTFTk	1	1	HCD	N-Term(iTRAQ4plex), C9(Methylthio), K13(iTRAQ4plex)	57.6484	5.32232	1	1	20591	Unique	Used	1.21504	2	867.44	1733.87	1.92511	62.62	6298	6298	MS2	20/24	Plasma_iTRAQ_3.raw
																gi119392081	gLETSLAEcTFTk	1	1	HCD	N-Term(iTRAQ4plex), C9(Methylthio), K13(iTRAQ4plex)	64.6492	5.13511	1	1	11669	Unique	Used	1.47793	2	867.44	1733.87	1.6435	39.1964	2546	2546	MS2	20/24	Plasma_iTRAQ_1_3.raw
																gi119392081	gLETSLAEcTFTk	1	1	HCD	N-Term(iTRAQ4plex), C9(Methylthio), K13(iTRAQ4plex)	75.6341	5.01876	1	1	11773	Unique	Used	1.36115	2	867.438	1733.87	-0.539008	40.8205	2659	2659	MS2	20/24	Plasma_iTRAQ_1_3.raw
																gi119392081	gLETSLAEcTFTk	1	1	HCD	N-Term(iTRAQ4plex), C9(Methylthio), K13(iTRAQ4plex)	68.2492	5.01415	1	1	11306	Unique	Used	1.32928	2	867.44	1733.87	1.92511	33.5489	2150	2150	MS2	19/24	Plasma_iTRAQ_1_3.raw
																gi119392081	gLETSLAEcTFTk	1	1	HCD	N-Term(iTRAQ4plex), C9(Methylthio), K13(iTRAQ4plex)	39.3112	4.95522	1	1	13516	Unique	Used	1.35318	3	578.628	1733.87	0.298078	68.0333	4564	4564	MS2	18/48	Plasma_iTRAQ_1_3.raw
																gi119392081	gLETSLAEcTFTk	1	1	HCD	N-Term(iTRAQ4plex), C9(Methylthio), K13(iTRAQ4plex)	27.4541	4.94439	1	1	13319	Unique	Used	1.27438	3	578.629	1733.87	1.45973	64.8999	4347	4347	MS2	16/48	Plasma_iTRAQ_1_3.raw
																gi119392081	gLETSLAEcTFTk	1	1	HCD	N-Term(iTRAQ4plex), C9(Methylthio), K13(iTRAQ4plex)	48.046	4.3064	1	1	20352	Unique	Used	1.78718	3	578.628	1733.87	0.614893	60.3378	6034	6034	MS2	22/48	Plasma_iTRAQ_3.raw
																gi119392081	gLETSLAEcTFTk	1	1	HCD	N-Term(iTRAQ4plex), C9(Methylthio), K13(iTRAQ4plex)	37.1466	4.28288	1	1	20450	Unique	Used	1.80684	3	578.628	1733.87	0.826103	61.2668	6142	6142	MS2	19/48	Plasma_iTRAQ_3.raw
																gi119392081	gLETSLAEcTFTk	1	1	HCD	N-Term(iTRAQ4plex), C9(Methylthio), K13(iTRAQ4plex)	38.1029	4.09228	1	1	19834	Unique	Used	1.29667	3	578.628	1733.87	-0.229947	55.5807	5473	5473	MS2	16/48	Plasma_iTRAQ_3.raw
																gi119392081	hGnTDSEGIVEVk	1	1	HCD	N-Term(iTRAQ4plex), N3(Deamidated), K13(iTRAQ4plex)	49.1101	5.46131	1	1	12905	Unique	Used	1.11141	2	837.433	1673.86	-0.325921	20.692	1296	1296	MS2	22/24	Plasma_iTRAQ_5.raw
																gi119392081	hGnTDSEGIVEVk	1	1	HCD	N-Term(iTRAQ4plex), N3(Deamidated), K13(iTRAQ4plex)	13.4754	5.1233	1	1	13329	Unique	Used	1.30853	3	558.624	1673.86	-1.24555	22.2265	1388	1388	MS2	21/48	Plasma_iTRAQ_6.raw
																gi119392081	hGnTDSEGIVEVk	1	1	HCD	N-Term(iTRAQ4plex), N3(Deamidated), K13(iTRAQ4plex)	37.3317	5.10704	1	1	12860	Unique	Used	1.12679	2	837.432	1673.86	-0.544703	20.5585	1323	1323	MS2	21/24	Plasma_iTRAQ_4.raw
																gi119392081	hGNTDSEGIVEVk	1	1	HCD	N-Term(iTRAQ4plex), K13(iTRAQ4plex)	20.2595	5.07108	1	1	13294	Unique	Used	1.37156	3	558.297	1672.88	1.49442	21.7751	1345	1345	MS2	22/48	Plasma_iTRAQ_6.raw
																gi119392081	hGnTDSEGIVEVk	1	1	HCD	N-Term(iTRAQ4plex), N3(Deamidated), K13(iTRAQ4plex)	36.2866	4.93509	1	1	12922	Unique	Used	1.20603	3	558.623	1673.85	-2.12068	20.8462	1315	1315	MS2	23/48	Plasma_iTRAQ_5.raw
																gi119392081	hGNTDSEGIVEVk	1	1	HCD	N-Term(iTRAQ4plex), K13(iTRAQ4plex)	17.4868	4.75913	1	1	12019	Unique	Used	1.10071	3	558.3	1672.88	5.98206	63.0604	4158	4158	MS2	20/48	Plasma_iTRAQ_4_6.raw
																gi119392081	hGnTDSEGIVEVk	1	1	HCD	N-Term(iTRAQ4plex), N3(Deamidated), K13(iTRAQ4plex)	19.6817	4.49441	1	1	9813	Unique	Used	1.00628	3	558.623	1673.85	-2.44886	26.114	1593	1593	MS2	18/48	Plasma_iTRAQ_4_6.raw
																gi119392081	hGNTDSEGIVEVk	1	1	HCD	N-Term(iTRAQ4plex), K13(iTRAQ4plex)	9.89837	4.15905	1	1	9733	Unique	Used	1.13959	3	558.298	1672.88	2.91733	24.6494	1494	1494	MS2	21/48	Plasma_iTRAQ_4_6.raw
																gi119392081	hGNTDSEGIVEVk	1	1	HCD	N-Term(iTRAQ4plex), K13(iTRAQ4plex)	20.1602	3.8244	1	1	13149	Unique	Used	0.890894	3	558.297	1672.88	1.71333	19.6839	1180	1180	MS2	16/48	Plasma_iTRAQ_6.raw
																gi119392081	hGnTDSEGIVEVk	1	1	HCD	N-Term(iTRAQ4plex), N3(Deamidated), K13(iTRAQ4plex)	22.1721	3.75364	1	1	12866	Unique	Used	0.815173	3	558.624	1673.86	-0.370418	20.6172	1330	1330	MS2	20/48	Plasma_iTRAQ_4.raw
																gi119392081	hGnTDSEGIVEVk	1	1	HCD	N-Term(iTRAQ4plex), N3(Deamidated), K13(iTRAQ4plex)	17.7516	3.69072	1	1	9847	Unique	Used	1.23714	2	837.436	1673.86	3.32044	26.7369	1635	1635	MS2	16/24	Plasma_iTRAQ_4_6.raw
																gi119392081	iIFHENYnAGTYQnDIALIEMk	1	1	HCD	N-Term(iTRAQ4plex), N8(Deamidated), N14(Deamidated), K22(iTRAQ4plex)	110.762	10.1226	1	1	16990	Unique	Used	1.23163	3	963.153	2887.45	1.0014	60.3999	5648	5648	MS2	31/84	Plasma_iTRAQ_6.raw
																gi119392081	iIFHENYNAGTYQnDIALIEMk	1	1	HCD	N-Term(iTRAQ4plex), N14(Deamidated), K22(iTRAQ4plex)	114.48	10.0689	1	1	16838	Unique	Used	1.26359	3	962.825	2886.46	0.56019	58.5544	5461	5461	MS2	30/84	Plasma_iTRAQ_6.raw
																gi119392081	iIFHENYNAGTYQNDIALIEMk	1	1	HCD	N-Term(iTRAQ4plex), K22(iTRAQ4plex)	119.223	9.24973	1	1	12294	Unique	Used	1.11848	3	962.497	2885.48	1.00708	67.5212	4476	4476	MS2	33/84	Plasma_iTRAQ_4_6.raw
																gi119392081	iIFHENYNAGTYQnDIALIEMk	1	1	HCD	N-Term(iTRAQ4plex), N14(Deamidated), K22(iTRAQ4plex)	102.139	9.05406	1	1	12375	Unique	Used	1.17945	3	962.823	2886.46	-1.21602	68.7794	4568	4568	MS2	33/84	Plasma_iTRAQ_4_6.raw
																gi119392081	iIFHENYNAGTYqNDIALIEMk	1	1	HCD	N-Term(iTRAQ4plex), Q13(Deamidated), K22(iTRAQ4plex)	86.1606	9.01313	1	1	17031	Unique	Used	1.19539	3	962.826	2886.46	1.82891	60.9446	5701	5701	MS2	32/84	Plasma_iTRAQ_6.raw
																gi119392081	iIFHENYnAGTYQNDIALIEMk	1	1	HCD	N-Term(iTRAQ4plex), N8(Deamidated), K22(iTRAQ4plex)	116.936	8.92612	1	1	17146	Unique	Used	1.1902	3	962.824	2886.46	-0.835403	62.301	5842	5842	MS2	31/84	Plasma_iTRAQ_6.raw
																gi119392081	iIFHENYNAGTYQNDIALIEMk	1	1	HCD	N-Term(iTRAQ4plex), K22(iTRAQ4plex)	126.626	8.71719	1	1	16904	Unique	Used	1.07444	3	962.497	2885.48	0.626337	59.3595	5542	5542	MS2	32/84	Plasma_iTRAQ_6.raw
																gi119392081	iIFHENYnAGTYQnDIALIEMk	1	1	HCD	N-Term(iTRAQ4plex), N8(Deamidated), N14(Deamidated), K22(iTRAQ4plex)	116.615	8.26273	1	1	17239	Unique	Used	1.30345	3	963.149	2887.43	-3.31079	63.3411	5954	5954	MS2	33/84	Plasma_iTRAQ_6.raw
																gi119392081	iIFHENYNAGTYQNDIALIEMk	1	1	HCD	N-Term(iTRAQ4plex), K22(iTRAQ4plex)	45.9787	5.68487	1	1	12301	Unique	Used	1.45747	4	722.125	2885.48	1.21395	67.6264	4484	4484	MS2	22/126	Plasma_iTRAQ_4_6.raw
																gi119392081	iIFHENYnAGTYQNDIALIEMk	1	1	HCD	N-Term(iTRAQ4plex), N8(Deamidated), K22(iTRAQ4plex)	47.0061	4.40156	1	1	17173	Unique	Used	0.723669	4	722.371	2886.46	1.67623	62.5786	5873	5873	MS2	24/126	Plasma_iTRAQ_6.raw
																gi119392081	iVIEYVDR	1	1	HCD	N-Term(iTRAQ4plex)	5.14629	3.07428	1	1	12485	Unique	Used	1.24437	2	575.833	1150.66	0.412856	52.0121	3442	3442	MS2	13/14	Plasma_iTRAQ_1_3.raw
																gi119392081	kYTHLScDk	1	1	HCD	N-Term(iTRAQ4plex), K1(iTRAQ4plex), C7(Methylthio), K9(iTRAQ4plex)	32.774	3.75178	1	1	7238	Unique	Used	1.76061	2	786.915	1572.82	-0.97155	21.6212	1312	1312	MS2	15/16	Plasma_iTRAQ_8.raw
																gi119392081	rIVIEYVDR	1	1	HCD	N-Term(iTRAQ4plex)	36.4981	4.59453	1	1	13753	Unique	Used	1.22358	3	436.259	1306.76	2.65357	26.9325	1892	1892	MS2	22/32	Plasma_iTRAQ_6.raw
																gi119392081	sFPTYcQQk	1	1	HCD	N-Term(iTRAQ4plex), C6(Methylthio), K9(iTRAQ4plex)	32.2817	3.80519	1	1	14621	Unique	Used	1.50659	2	718.352	1435.7	1.70728	37.0798	3233	3233	MS2	12/16	Plasma_iTRAQ_4.raw
																gi119392081	sFPTYcQQk	1	1	HCD	N-Term(iTRAQ4plex), C6(Methylthio), K9(iTRAQ4plex)	32.0588	3.34136	1	1	17505	Unique	Used	1.36214	2	718.352	1435.7	1.1121	33.5181	2915	2915	MS2	12/16	Plasma_iTRAQ_3.raw
																gi119392081	sLEcLHPGTk	1	1	HCD	N-Term(iTRAQ4plex), C4(Methylthio), K10(iTRAQ4plex)	48.4231	3.90188	1	1	10629	Unique	Used	1.4844	2	709.872	1418.74	0.104408	39.7624	2537	2537	MS2	15/18	Plasma_iTRAQ_4_6.raw
																gi119392081	tMGYQDFADVVcYTQk	1	1	HCD	N-Term(iTRAQ4plex), C12(Methylthio), K16(iTRAQ4plex)	129.965	6.82185	1	1	20924	Unique	Used	1.57539	2	1102.01	2203.01	-0.323491	65.9926	6672	6672	MS2	23/30	Plasma_iTRAQ_3.raw
																gi119392081	tmGYQDFADVVcYTQk	1	1	HCD	N-Term(iTRAQ4plex), M2(Oxidation), C12(Methylthio), K16(iTRAQ4plex)	101.633	6.16106	1	1	20390	Unique	Used	1.55997	2	1110.01	2219.01	1.09023	60.5489	6053	6053	MS2	21/30	Plasma_iTRAQ_2.raw
																gi119392081	tmGYQDFADVVcYTQk	1	1	HCD	N-Term(iTRAQ4plex), M2(Oxidation), C12(Methylthio), K16(iTRAQ4plex)	79.3082	6.06999	1	1	20472	Unique	Used	1.25681	3	740.341	2219.01	0.864122	61.4748	6166	6166	MS2	23/60	Plasma_iTRAQ_3.raw
																gi119392081	tMGYQDFADVVcYTQk	1	1	HCD	N-Term(iTRAQ4plex), C12(Methylthio), K16(iTRAQ4plex)	94.0157	6.03686	1	1	13758	Unique	Used	1.43325	3	735.009	2203.01	1.00026	72.0277	4835	4835	MS2	23/60	Plasma_iTRAQ_1_3.raw
																gi119392081	tMGYQDFADVVcYTQk	1	1	HCD	N-Term(iTRAQ4plex), C12(Methylthio), K16(iTRAQ4plex)	87.6078	5.99491	1	1	20864	Unique	Used	1.5182	3	735.009	2203.01	1.08338	65.0272	6569	6569	MS2	28/60	Plasma_iTRAQ_2.raw
																gi119392081	tMGYQDFADVVcYTQk	1	1	HCD	N-Term(iTRAQ4plex), C12(Methylthio), K16(iTRAQ4plex)	70.1419	5.94995	1	1	13617	Unique	Used	1.40567	3	735.009	2203.01	0.750913	69.6755	4676	4676	MS2	26/60	Plasma_iTRAQ_1_3.raw
																gi119392081	tMGYQDFADVVcYTQk	1	1	HCD	N-Term(iTRAQ4plex), C12(Methylthio), K16(iTRAQ4plex)	127.071	5.84487	1	1	20877	Unique	Used	1.76925	2	1102.01	2203.01	0.784722	65.1383	6583	6583	MS2	22/30	Plasma_iTRAQ_2.raw
																gi119392081	tmGYQDFADVVcYTQk	1	1	HCD	N-Term(iTRAQ4plex), M2(Oxidation), C12(Methylthio), K16(iTRAQ4plex)	79.0857	5.8244	1	1	20393	Unique	Used	1.70778	3	740.341	2219.01	1.35922	60.6069	6057	6057	MS2	25/60	Plasma_iTRAQ_2.raw
																gi119392081	tMGYQDFADVVcYTQk	1	1	HCD	N-Term(iTRAQ4plex), C12(Methylthio), K16(iTRAQ4plex)	89.4583	5.52842	1	1	20919	Unique	Used	1.69682	3	735.01	2203.01	1.66519	65.9323	6666	6666	MS2	26/60	Plasma_iTRAQ_3.raw
																gi119392081	tmGYQDFADVVcYTQk	1	1	HCD	N-Term(iTRAQ4plex), M2(Oxidation), C12(Methylthio), K16(iTRAQ4plex)	69.1223	5.4446	1	1	13526	Unique	Used	1.22013	3	740.34	2219	-0.621182	68.1909	4575	4575	MS2	22/60	Plasma_iTRAQ_1_3.raw
																gi119392081	vANYFDWISYHVGRPFISQYNV	1	1	HCD	N-Term(iTRAQ4plex)	147.785	9.16271	1	1	18078	Unique	Used	1.21854	3	940.475	2819.41	1.45747	75.7443	7080	7080	MS2	22/84	Plasma_iTRAQ_6.raw
																gi119392081	vANYFDWISYHVGRPFISQYNV	1	1	HCD	N-Term(iTRAQ4plex)	102.123	8.67512	1	1	18270	Unique	Used	1.35682	3	940.473	2819.41	-0.425923	77.7253	7304	7304	MS2	25/84	Plasma_iTRAQ_6.raw
																gi119392081	vANYFDWISYHVGRPFISQYNV	1	1	HCD	N-Term(iTRAQ4plex)	113.35	8.02429	1	1	12988	Unique	Used	1.278	3	940.473	2819.41	-0.296034	77.6608	5277	5277	MS2	24/84	Plasma_iTRAQ_4_6.raw
																gi119392081	vANYFDWISYHVGRPFISQyNV	1	1	HCD	N-Term(iTRAQ4plex), Y20(iTRAQ4plex)	77.0267	5.13998	1	1	14642	Unique	Used	1.00386	4	741.631	2963.5	-2.1851	69.6917	6142	6142	MS2	25/126	Plasma_iTRAQ_7.raw
																gi119392081	vFcQPWQR	1	1	HCD	N-Term(iTRAQ4plex), C3(Methylthio)	10.4197	3.14745	1	1	7976	Unique	Used	1.81646	2	627.306	1253.6	0.605156	27.6765	2709	2709	MS2	11/14	Plasma_iTRAQ_6_8.raw
																gi119392081	vFcQPWQR	1	1	HCD	N-Term(iTRAQ4plex), C3(Methylthio)	4.02464	3.02634	1	1	7982	Unique	Used	1.72935	2	627.306	1253.6	0.605156	27.7282	2715	2715	MS2	11/14	Plasma_iTRAQ_6_8.raw
																gi119392081	vFSLQWGEVk	1	1	HCD	N-Term(iTRAQ4plex), K10(iTRAQ4plex)	28.6409	4.63763	1	1	16409	Unique	Used	1.52056	2	740.924	1480.84	0.817753	57.9834	5289	5289	MS2	17/18	Plasma_iTRAQ_5.raw
																gi119392081	vFSLqWGEVk	1	1	HCD	N-Term(iTRAQ4plex), Q5(Deamidated), K10(iTRAQ4plex)	30.7003	4.2554	1	1	16576	Unique	Used	1.30884	2	741.416	1481.82	-0.176196	59.7881	5476	5476	MS2	17/18	Plasma_iTRAQ_5.raw
																gi119392081	vFSLQWGEVk	1	1	HCD	N-Term(iTRAQ4plex), K10(iTRAQ4plex)	25.8578	4.20693	1	1	16423	Unique	Used	1.45287	3	494.281	1480.83	-8.83608	58.1335	5305	5305	MS2	17/36	Plasma_iTRAQ_5.raw
																gi119392081	vTYTSQEDLVEk	1	1	HCD	N-Term(iTRAQ4plex), K12(iTRAQ4plex)	65.9397	5.80924	1	1	17084	Unique	Used	1.33897	2	850.457	1699.91	4.26755	30.4036	2463	2463	MS2	21/22	Plasma_iTRAQ_2.raw
																gi119392081	vTYTSQEDLVEk	1	1	HCD	N-Term(iTRAQ4plex), K12(iTRAQ4plex)	56.676	5.7384	1	1	14132	Unique	Used	1.34252	2	850.453	1699.9	0.0307612	32.0631	2701	2701	MS2	20/22	Plasma_iTRAQ_4.raw
																gi119392081	yQIWTTVVDWIHPDLk	1	1	HCD	N-Term(iTRAQ4plex), K16(iTRAQ4plex)	108.377	8.52946	1	1	18100	Unique	Used	1.49832	3	768.088	2302.25	1.35353	75.9791	7106	7106	MS2	32/60	Plasma_iTRAQ_6.raw
																gi119392081	yQIWTTVVDWIHPDLkR	1	1	HCD	N-Term(iTRAQ4plex), K16(iTRAQ4plex)	94.5343	6.49769	1	1	14745	Unique	Used	2.25163	4	615.343	2458.35	0.473835	71.6036	6297	6297	MS2	22/96	Plasma_iTRAQ_7.raw
gi119395709	F13A1	2162	coagulation factor XIII A1 subunit precursor	732	83.2	16.26	10	8	0.773	9.39459			Extracellular	Transferase activity;	Metabolism; Energy pathways;
																gi119395709	aVPPnNSNAAEDDLPTVELQGVVPR	1	1	HCD	N-Term(iTRAQ4plex), N5(Deamidated)	10.2287	5.27223	1	1	16959	Unique	Used	1.04007	3	916.473	2747.4	2.68644	61.8404	5791	5791	MS2	20/96	Plasma_iTRAQ_4.raw
																gi119395709	cGPASVQAIk	1	1	HCD	N-Term(iTRAQ4plex), C1(Methylthio), K10(iTRAQ4plex)	43.6568	4.46952	1	1	13946	Unique	Used	0.817016	2	654.354	1307.7	-3.87193	30.6467	2453	2453	MS2	17/18	Plasma_iTRAQ_5.raw
																gi119395709	eTFDVTLEPLSFk	1	1	HCD	N-Term(iTRAQ4plex), K13(iTRAQ4plex)	70.0582	4.97972	1	1	20787	Unique	Used	0.838496	2	907.497	1813.99	1.98808	64.641	6520	6520	MS2	20/24	Plasma_iTRAQ_3.raw
																gi119395709	gTYIPVPIVSELQSGk	1	1	HCD	N-Term(iTRAQ4plex), K16(iTRAQ4plex)	74.468	4.88179	1	1	17535	Unique	Used	0.750667	3	659.382	1976.13	0.495759	69.41	6442	6442	MS2	23/60	Plasma_iTRAQ_4.raw
																gi119395709	gTYIPVPIVSELQSGk	1	1	HCD	N-Term(iTRAQ4plex), K16(iTRAQ4plex)	48.2283	3.78378	1	1	20550	Unique	Used	1.12807	2	988.569	1976.13	-0.207819	62.2053	6252	6252	MS2	18/30	Plasma_iTRAQ_3.raw
																gi119395709	gVNLQEFLNVTSVHLFk	1	1	HCD	N-Term(iTRAQ4plex), K17(iTRAQ4plex)	103.738	9.53299	1	1	17832	Unique	Used	0.662082	3	745.092	2233.26	1.18355	71.9199	6745	6745	MS2	36/64	Plasma_iTRAQ_6.raw
																gi119395709	lIASMSSDSLR	1	1	HCD	N-Term(iTRAQ4plex)	19.693	3.99745	1	1	17952	Unique	Used	0.711259	2	662.361	1323.71	6.77415	37.9715	3396	3396	MS2	16/20	Plasma_iTRAQ_2.raw
																gi119395709	qIGGDGMMDITDTYk	1	1	HCD	N-Term(iTRAQ4plex), K15(iTRAQ4plex)	25.7158	3.65086	1	1	15984	Unique	Used	0.773771	2	966.949	1932.89	-20.0628	51.0594	4722	4722	MS2	15/28	Plasma_iTRAQ_4.raw
																gi119395709	sTVLTIPEIIIk	1	1	HCD	N-Term(iTRAQ4plex), K12(iTRAQ4plex)	48.0821	4.26136	1	1	20811	Unique	Used	0.806424	2	808.019	1615.03	0.845467	64.8685	6546	6546	MS2	17/22	Plasma_iTRAQ_3.raw
																gi119395709	sTVLTIPEIIIk	1	1	HCD	N-Term(iTRAQ4plex), K12(iTRAQ4plex)	35.3744	3.42193	1	1	20810	Unique	Used	0.858545	3	539.012	1615.02	-4.18921	64.8618	6545	6545	MS2	18/44	Plasma_iTRAQ_3.raw
gi119395748	KCNA1	3736	potassium voltage-gated channel subfamily A member 1	495	56.4	2.63	1	1	1.089			T	Plasma membrane	Voltage-gated ion channel activity;	Transport;
																gi119395748	hSkGLqILGQTLk	4	1	HCD	N-Term(iTRAQ4plex), K3(iTRAQ4plex), Q6(Deamidated), K13(iTRAQ4plex)	21.2109	3.83502	1	1	12371	Unique	Used	1.089	4	464.786	1856.12	-6.85642	38.2666	3143	3143	MS2	17/72	Plasma_iTRAQ_7.raw
gi119395750	KRT1	3848	keratin, type II cytoskeletal 1	644	66	23.29	22	10	1.321	4.02521			Plasma membrane	Structural molecule activity;	Cell growth and/or maintenance;
																gi119395750	aEAESLYQSk	1	1	HCD	N-Term(iTRAQ4plex), K10(iTRAQ4plex)	41.3209	4.55356	1	1	16298	Unique	Used	1.3311	2	707.38	1413.75	3.78375	23.4958	1613	1613	MS2	17/18	Plasma_iTRAQ_2.raw
																gi119395750	aEAESLYQSk	1	1	HCD	N-Term(iTRAQ4plex), K10(iTRAQ4plex)	50.2226	4.48821	1	1	16308	Unique	Used	1.40026	2	707.38	1413.75	3.95644	22.9343	1611	1611	MS2	17/18	Plasma_iTRAQ_3.raw
																gi119395750	aQYEDIAQk	1	1	HCD	N-Term(iTRAQ4plex), K9(iTRAQ4plex)	42.4618	4.37935	1	1	16191	Unique	Used	1.41975	2	677.367	1353.73	0.353326	22.4951	1495	1495	MS2	15/16	Plasma_iTRAQ_2.raw
																gi119395750	aQYEDIAQk	1	1	HCD	N-Term(iTRAQ4plex), K9(iTRAQ4plex)	23.8239	3.97012	1	1	13030	Unique	Used	1.16586	2	677.364	1353.72	-2.89293	22.0027	1507	1507	MS2	15/16	Plasma_iTRAQ_4.raw
																gi119395750	aQYEDIAQk	1	1	HCD	N-Term(iTRAQ4plex), K9(iTRAQ4plex)	43.4309	3.81754	1	1	16170	Unique	Used	0.940585	2	677.369	1353.73	4.68164	21.7371	1460	1460	MS2	15/16	Plasma_iTRAQ_3.raw
																gi119395750	gGGGGGYGSGGSSYGSGGGSYGSGGGGGGGR	1	1	HCD	N-Term(iTRAQ4plex)	133.983	9.65976	1	1	14553	Unique	Used	0.913401	3	843.358	2528.06	1.88948	20.0924	1201	1201	MS2	46/120	Plasma_iTRAQ_1.raw
																gi119395750	gGGGGGYGSGGSSYGSGGGSYGSGGGGGGGR	1	1	HCD	N-Term(iTRAQ4plex)	113.683	9.28388	1	1	16001	Unique	Used	0.964058	3	843.358	2528.06	2.17919	20.776	1291	1291	MS2	35/120	Plasma_iTRAQ_2.raw
																gi119395750	gGGGGGYGSGGSSYGSGGGSYGSGGGGGGGR	1	1	HCD	N-Term(iTRAQ4plex)	300	7.20631	1	1	12734	Unique	Used	1.31546	2	1264.53	2528.05	-1.36453	19.5379	1187	1187	MS2	36/60	Plasma_iTRAQ_4.raw
																gi119395750	gGGGGGYGSGGSSyGSGGGSYGSGGGGGGGR	1	1	HCD	N-Term(iTRAQ4plex), Y14(iTRAQ4plex)	62.8885	5.23506	1	1	13114	Unique	Used	1.21112	3	891.396	2672.17	7.03643	19.079	1138	1138	MS2	24/120	Plasma_iTRAQ_6.raw
																gi119395750	gGGGGGYGSGGSSYGSGGGSYGSGGGGGGGR	1	1	HCD	N-Term(iTRAQ4plex)	56.5217	5.06183	1	1	12732	Unique	Used	0.994118	3	843.36	2528.06	4.27963	19.5238	1185	1185	MS2	26/120	Plasma_iTRAQ_4.raw
																gi119395750	lNDLEDALQQAk	1	1	HCD	N-Term(iTRAQ4plex), K12(iTRAQ4plex)	43.1615	6.02959	1	1	19819	Unique	Used	1.41842	2	823.455	1645.9	1.9117	55.4507	5457	5457	MS2	20/22	Plasma_iTRAQ_3.raw
																gi119395750	lNDLEDALQQAk	1	1	HCD	N-Term(iTRAQ4plex), K12(iTRAQ4plex)	27.7214	5.07642	1	1	19831	Unique	Used	1.38387	3	549.303	1645.9	-2.73187	55.5609	5470	5470	MS2	21/44	Plasma_iTRAQ_3.raw
																gi119395750	nMQDMVEDYR	1	1	HCD	N-Term(iTRAQ4plex)	62.3794	4.21791	1	1	17158	Unique	Used	1.66827	2	722.82	1444.63	0.66711	43.9445	4013	4013	MS2	16/18	Plasma_iTRAQ_1.raw
																gi119395750	qISNLQQSISDAEQR	1	1	HCD	N-Term(iTRAQ4plex)	62.0255	5.7414	1	1	17487	Unique	Used	1.26131	2	930.983	1860.96	2.91326	47.0511	4366	4366	MS2	22/28	Plasma_iTRAQ_1.raw
																gi119395750	qISNLQQSISDAEQR	1	1	HCD	N-Term(iTRAQ4plex)	78.2381	5.59522	1	1	15465	Unique	Used	1.40093	2	930.98	1860.95	0.158257	45.7976	4153	4153	MS2	22/28	Plasma_iTRAQ_4.raw
																gi119395750	sLDLDSIIAEVk	1	1	HCD	N-Term(iTRAQ4plex), K12(iTRAQ4plex)	59.2716	5.37535	1	1	21218	Unique	Used	1.49102	2	795.965	1590.92	2.71181	68.8387	6997	6997	MS2	21/22	Plasma_iTRAQ_3.raw
																gi119395750	sLDLDSIIAEVk	1	1	HCD	N-Term(iTRAQ4plex), K12(iTRAQ4plex)	39.2702	4.02116	1	1	21272	Unique	Used	1.14117	3	530.979	1590.92	2.08953	69.1419	7022	7022	MS2	17/44	Plasma_iTRAQ_2.raw
																gi119395750	sLnNQFASFIDk	1	1	HCD	N-Term(iTRAQ4plex), N3(Deamidated), K12(iTRAQ4plex)	58.5804	5.43687	1	1	19937	Unique	Used	1.42941	2	836.947	1672.89	5.30424	56.58	5585	5585	MS2	18/22	Plasma_iTRAQ_3.raw
																gi119395750	tHNLEPYFESFINNLR	1	1	HCD	N-Term(iTRAQ4plex)	68.8783	5.77579	1	1	17462	Unique	Used	1.40656	3	713.365	2138.08	0.768518	66.0022	6231	6231	MS2	23/60	Plasma_iTRAQ_6.raw
																gi119395750	tNAENEFVTIk	1	1	HCD	N-Term(iTRAQ4plex), K11(iTRAQ4plex)	55.6782	4.83722	1	1	17407	Unique	Used	1.45102	2	777.427	1553.85	3.6723	32.5992	2808	2808	MS2	18/20	Plasma_iTRAQ_3.raw
																gi119395750	tNAENEFVTIk	1	1	HCD	N-Term(iTRAQ4plex), K11(iTRAQ4plex)	46.2661	4.79941	1	1	17316	Unique	Used	1.46723	2	777.426	1553.85	2.65102	32.3307	2711	2711	MS2	17/20	Plasma_iTRAQ_2.raw
																gi119395750	tNAENEFVTIk	1	1	HCD	N-Term(iTRAQ4plex), K11(iTRAQ4plex)	56.2324	4.75669	1	1	14490	Unique	Used	1.62765	2	777.426	1553.85	2.72958	35.6453	3090	3090	MS2	17/20	Plasma_iTRAQ_4.raw
gi119703753	KRT6B	3854	keratin, type II cytoskeletal 6B	564	60	4.26	1	1	1.343	11.9216			Cytoplasm	Structural molecule activity;	Cell growth and/or maintenance;
																gi119703753	aDTLTDEINFLR	3	1	HCD	N-Term(iTRAQ4plex)	21.0929	4.83616	1	1	19230	Unique	Used	1.22998	2	776.411	1551.81	0.210123	63.4923	6240	6240	MS2	20/22	Plasma_iTRAQ_1.raw
gi126012571	HSPG2	3339	basement membrane-specific heparan sulfate proteoglycan core protein precursor	4391	468.5	0.66	4	3	1.156	27.2344	S		Extracellular	Extracellular matrix structural constituent;	Cell growth and/or maintenance;
																gi126012571	dFISLGLQDGHLVFR	1	1	HCD	N-Term(iTRAQ4plex)	69.0108	5.26071	1	1	17341	Unique	Used	1.37903	3	621.007	1861.01	-1.49738	64.5879	6082	6082	MS2	25/56	Plasma_iTRAQ_6.raw
																gi126012571	gSIQVDGEELVSGR	1	1	HCD	N-Term(iTRAQ4plex)	32.2545	5.14907	1	1	17433	Unique	Used	0.933662	2	795.417	1589.83	1.2528	46.5756	4308	4308	MS2	22/26	Plasma_iTRAQ_1.raw
																gi126273559	skDHEELSLVASEAVR	2	1	HCD	N-Term(iTRAQ4plex), K2(iTRAQ4plex)	74.1815	5.88395	1	1	11187	Unique	Used	0.809387	3	686.708	2058.11	1.27592	25.721	1740	1740	MS2	26/60	Plasma_iTRAQ_7.raw
																gi126273559	skDHEELSLVASEAVR	2	1	HCD	N-Term(iTRAQ4plex), K2(iTRAQ4plex)	91.3326	5.58671	1	1	11200	Unique	Used	1.22829	2	1029.56	2058.12	4.12942	25.8423	1755	1755	MS2	22/30	Plasma_iTRAQ_7.raw
gi126273569	CPB2	1361	plasma carboxypeptidase B2 isoform a preproprotein	423	48.4	16.78	5	4	1.158	15.8238	S		-	Carboxypeptidase activity;	Protein metabolism;
																gi126273569	dTGTYGFLLPER	1	1	HCD	N-Term(iTRAQ4plex)	34.4346	5.29064	1	1	19516	Unique	Used	1.10027	2	756.896	1512.79	2.35161	52.752	5106	5106	MS2	20/22	Plasma_iTRAQ_2.raw
																gi126273569	eAFAAVSk	1	1	HCD	N-Term(iTRAQ4plex), K8(iTRAQ4plex)	10.8386	3.58408	1	1	13037	Unique	Used	0.914557	2	555.822	1110.64	-2.15246	22.0711	1515	1515	MS2	13/14	Plasma_iTRAQ_4.raw
																gi126273569	lVDFYVmPVVNVDGYDYSWk	1	1	HCD	N-Term(iTRAQ4plex), M7(Oxidation), K20(iTRAQ4plex)	73.4507	6.46036	1	1	21713	Unique	Used	1.44906	3	905.122	2713.35	1.37743	74.4135	7561	7561	MS2	21/76	Plasma_iTRAQ_3.raw
																gi126273569	lVDFYVMPVVNVDGYDYSWk	1	1	HCD	N-Term(iTRAQ4plex), K20(iTRAQ4plex)	85.8373	5.13946	1	1	21906	Unique	Used	1.01006	3	899.792	2697.36	3.46027	76.2739	7776	7776	MS2	22/76	Plasma_iTRAQ_3.raw
																gi126273569	sFYAnNHcIGTDLNR	2	1	HCD	N-Term(iTRAQ4plex), N5(Deamidated), C8(Methylthio)	31.2471	4.87023	1	1	15490	Unique	Used	1.11749	3	639.288	1915.85	-3.22331	46.064	4181	4181	MS2	21/56	Plasma_iTRAQ_4.raw
gi13236565	CENPO	79172	centromere protein O	300	33.8	6	1	1	0.78				-	Molecular function unknown;	Biological_process unknown;
																gi13236565	qSEELqSVqAqEGALGTk	1	1	HCD	N-Term(iTRAQ4plex), Q1(Deamidated), Q6(Deamidated), Q9(Deamidated), Q11(Deamidated), K18(iTRAQ4plex)	1	3.60401	1	1	21573	Unique	Used	0.779915	3	732.359	2195.06	-7.75811	72.0694	7351	7351	MS2	11/68	Plasma_iTRAQ_2.raw
gi132814489	FCGR3B	2215	low affinity immunoglobulin gamma Fc region receptor III-B precursor	233	26.2	5.15	2	1	1.538		S	T	-	Receptor activity;	Immune response;
																gi132814489	yFHHNSDFHIPk	1	1	HCD	N-Term(iTRAQ4plex), K12(iTRAQ4plex)	27.186	4.22092	1	1	7670	Unique	Used	1.28403	4	458.24	1829.94	2.10104	28.2821	1891	1891	MS2	20/66	Plasma_iTRAQ_8.raw
																gi132814489	yFHHNSDFHIPk	1	1	HCD	N-Term(iTRAQ4plex), K12(iTRAQ4plex)	31.9033	3.83176	1	1	7678	Unique	Used	1.84226	5	366.792	1829.93	-0.0242663	28.3823	1901	1901	MS2	20/88	Plasma_iTRAQ_8.raw
gi13325075	QSOX1	5768	sulfhydryl oxidase 1 isoform a	747	82.5	16.47	4	4	1.239	9.05033	S	T	Extracellular	Molecular function unknown;	Regulation of cell cycle;
																gi13325075	aAPGQEPPEHmAELQR	1	1	HCD	N-Term(iTRAQ4plex), M11(Oxidation)	41.1541	5.9148	1	1	12677	Unique	Used	1.01724	3	640.984	1920.94	0.445191	18.9146	1123	1123	MS2	24/60	Plasma_iTRAQ_4.raw
																gi13325075	dFNIPGFPTVR	2	1	HCD	N-Term(iTRAQ4plex)	11.3411	3.6251	1	1	17064	Unique	Used	1.67165	2	703.882	1406.76	0.785313	63.1256	5907	5907	MS2	14/20	Plasma_iTRAQ_4.raw
																gi13325075	lAGAPSEDPQFPk	2	1	HCD	N-Term(iTRAQ4plex), K13(iTRAQ4plex)	32.0843	4.74231	1	1	14566	Unique	Used	1.18123	2	822.945	1644.88	-0.751107	36.5107	3173	3173	MS2	17/24	Plasma_iTRAQ_4.raw
																gi13325075	sALYSPSDPLTLLQADTVR	2	1	HCD	N-Term(iTRAQ4plex)	92.8055	5.86698	1	1	17983	Unique	Used	1.22368	2	1096.09	2191.17	-1.60519	75.7795	6960	6960	MS2	23/36	Plasma_iTRAQ_4.raw
gi133925809	ITIH3	3699	inter-alpha (globulin) inhibitor H3 preproprotein	890	99.8	24.94	58	14	1.206	10.8501	S		Extracellular	Protease inhibitor activity;	Protein metabolism;
																gi133925809	dYIFGNYIER	1	1	HCD	N-Term(iTRAQ4plex)	12.0384	3.32782	1	1	16610	Unique	Used	1.49927	2	717.364	1433.72	2.22273	57.6068	5402	5402	MS2	13/18	Plasma_iTRAQ_4.raw
																gi133925809	eHLVQATPENLQEAR	1	1	HCD	N-Term(iTRAQ4plex)	78.704	5.63558	1	1	13195	Unique	Used	1.16916	3	626.997	1878.98	-1.38358	23.208	1615	1615	MS2	25/56	Plasma_iTRAQ_5.raw
																gi133925809	eHLVqATPENLQEAR	1	1	HCD	N-Term(iTRAQ4plex), Q5(Deamidated)	36.581	5.62224	1	1	13346	Unique	Used	1.01487	3	627.324	1879.96	-2.55548	24.59	1783	1783	MS2	22/56	Plasma_iTRAQ_5.raw
																gi133925809	eHLVQATPENLQEAR	1	1	HCD	N-Term(iTRAQ4plex)	36.4274	5.2967	1	1	13236	Unique	Used	1.28356	2	939.996	1878.98	2.58651	23.7702	1729	1729	MS2	19/28	Plasma_iTRAQ_4.raw
																gi133925809	eHLVQATPENLQEAR	1	1	HCD	N-Term(iTRAQ4plex)	41.6544	5.14845	1	1	13196	Unique	Used	1.02407	2	939.993	1878.98	-0.0770979	23.2111	1616	1616	MS2	21/28	Plasma_iTRAQ_5.raw
																gi133925809	eSPGNVQIVnGYFVHFFAPQGLPVVPk	1	1	HCD	N-Term(iTRAQ4plex), N10(Deamidated), K27(iTRAQ4plex)	132.378	8.65621	1	1	17966	Unique	Used	1.39483	3	1077.25	3229.73	1.67346	74.0167	6928	6928	MS2	36/104	Plasma_iTRAQ_6.raw
																gi133925809	eSPGNVqIVNGYFVHFFAPqGLPVVPk	1	1	HCD	N-Term(iTRAQ4plex), Q7(Deamidated), Q20(Deamidated), K27(iTRAQ4plex)	62.3681	8.51763	1	1	17792	Unique	Used	1.07919	3	1077.58	3230.71	-0.369637	71.348	6692	6692	MS2	27/104	Plasma_iTRAQ_6.raw
																gi133925809	eSPGNVQIVnGYFVHFFAPQGLPVVPk	1	1	HCD	N-Term(iTRAQ4plex), N10(Deamidated), K27(iTRAQ4plex)	103.186	8.09519	1	1	14705	Unique	Used	1.21847	3	1077.25	3229.73	-0.70768	70.9361	6240	6240	MS2	32/104	Plasma_iTRAQ_7.raw
																gi133925809	eSPGNVQIVNGYFVHFFAPQGLPVVPk	1	1	HCD	N-Term(iTRAQ4plex), K27(iTRAQ4plex)	149.132	8.07092	1	1	14795	Unique	Used	1.2699	3	1076.92	3228.74	-2.18015	72.5667	6374	6374	MS2	29/104	Plasma_iTRAQ_7.raw
																gi133925809	eSPGNVQIVnGYFVHFFAPQGLPVVPk	1	1	HCD	N-Term(iTRAQ4plex), N10(Deamidated), K27(iTRAQ4plex)	109.93	7.4922	1	1	17751	Unique	Used	1.08754	3	1077.25	3229.73	0.426196	70.5995	6631	6631	MS2	29/104	Plasma_iTRAQ_6.raw
																gi133925809	eSPGNVQIVnGYFVHFFAPQGLPVVPk	1	1	HCD	N-Term(iTRAQ4plex), N10(Deamidated), K27(iTRAQ4plex)	46.0173	5.10223	1	1	17726	Unique	Used	1.98635	4	808.189	3229.73	1.5748	70.2682	6599	6599	MS2	26/156	Plasma_iTRAQ_6.raw
																gi133925809	eVSFDVELPk	1	1	HCD	N-Term(iTRAQ4plex), K10(iTRAQ4plex)	28.1254	4.42775	1	1	16235	Unique	Used	1.19872	2	725.906	1450.8	0.37306	53.6822	4995	4995	MS2	17/18	Plasma_iTRAQ_4.raw
																gi133925809	eVSFDVELPk	1	1	HCD	N-Term(iTRAQ4plex), K10(iTRAQ4plex)	48.2318	4.41359	1	1	19361	Unique	Used	1.31562	2	725.906	1450.8	1.21446	51.2842	4955	4955	MS2	17/18	Plasma_iTRAQ_3.raw
																gi133925809	eVSFDVELPk	1	1	HCD	N-Term(iTRAQ4plex), K10(iTRAQ4plex)	42.2817	4.05796	1	1	19385	Unique	Used	1.49034	3	484.272	1450.8	-1.90799	51.4593	4980	4980	MS2	18/36	Plasma_iTRAQ_3.raw
																gi133925809	fPLYNLGFGNNLNYNFLENMALENHGFAR	1	1	HCD	N-Term(iTRAQ4plex)	300	9.47292	1	1	18134	Unique	Used	1.37015	3	1178.58	3533.72	0.656496	76.3369	7146	7146	MS2	38/112	Plasma_iTRAQ_6.raw
																gi133925809	fPLYNLGFGNNLNYNFLENMALENHGFAR	1	1	HCD	N-Term(iTRAQ4plex)	300	9.24939	1	1	18293	Unique	Used	1.46394	3	1178.58	3533.72	0.0346961	77.9948	7331	7331	MS2	35/112	Plasma_iTRAQ_6.raw
																gi133925809	fPLyNLGFGNNLNYNFLENMALENHGFAR	1	1	HCD	N-Term(iTRAQ4plex), Y4(iTRAQ4plex)	139.46	9.14936	1	1	14891	Unique	Used	1.14896	4	920.216	3677.84	5.55262	74.5127	6525	6525	MS2	27/168	Plasma_iTRAQ_7.raw
																gi133925809	gHGATnDLTFTEEVDmk	1	1	HCD	N-Term(iTRAQ4plex), N6(Deamidated), M16(Oxidation), K17(iTRAQ4plex)	57.3543	7.93757	1	1	14232	Unique	Used	1.28153	3	724.005	2170	-9.61147	33.5943	2774	2774	MS2	28/64	Plasma_iTRAQ_5.raw
																gi133925809	gHGATnDLTFTEEVDMk	1	1	HCD	N-Term(iTRAQ4plex), N6(Deamidated), K17(iTRAQ4plex)	66.2318	6.4033	1	1	15164	Unique	Used	1.36627	3	718.681	2154.03	1.58587	44.0134	3848	3848	MS2	28/64	Plasma_iTRAQ_5.raw
																gi133925809	gHGATnDLTFTEEVDMk	1	1	HCD	N-Term(iTRAQ4plex), N6(Deamidated), K17(iTRAQ4plex)	42.9722	6.23242	1	1	14966	Unique	Used	1.15354	3	718.68	2154.03	-0.199258	41.5172	3612	3612	MS2	27/64	Plasma_iTRAQ_5.raw
																gi133925809	gHGATnDLTFTEEVDMk	1	1	HCD	N-Term(iTRAQ4plex), N6(Deamidated), K17(iTRAQ4plex)	63.1224	6.16583	1	1	15048	Unique	Used	1.67145	3	718.68	2154.02	-0.794301	42.7298	3715	3715	MS2	27/64	Plasma_iTRAQ_5.raw
																gi133925809	gHGATnDLTFTEEVDmk	1	1	HCD	N-Term(iTRAQ4plex), N6(Deamidated), M16(Oxidation), K17(iTRAQ4plex)	22.4709	4.3875	1	1	14239	Unique	Used	1.50815	4	543.254	2169.99	-12.796	33.6418	2781	2781	MS2	22/96	Plasma_iTRAQ_5.raw
																gi133925809	gISMLNk	1	1	HCD	N-Term(iTRAQ4plex), K7(iTRAQ4plex)	8.87592	3.10898	1	1	13388	Unique	Used	1.2159	2	525.814	1050.62	-0.708039	25.0152	1892	1892	MS2	12/12	Plasma_iTRAQ_4.raw
																gi133925809	gMTNInDGLLR	1	1	HCD	N-Term(iTRAQ4plex), N6(Deamidated)	24.7779	5.04433	1	1	15194	Unique	Used	1.20343	2	674.855	1348.7	0.843631	42.9917	3858	3858	MS2	19/20	Plasma_iTRAQ_4.raw
																gi133925809	gMTNINDGLLR	1	1	HCD	N-Term(iTRAQ4plex)	56.4222	4.54475	1	1	14866	Unique	Used	1.14927	2	674.363	1347.72	1.75535	39.5742	3499	3499	MS2	19/20	Plasma_iTRAQ_4.raw
																gi133925809	kGHVSFkPSLDQQR	1	1	HCD	N-Term(iTRAQ4plex), K1(iTRAQ4plex), K7(iTRAQ4plex)	86.4159	6.19774	1	1	7158	Unique	Used	1.43557	5	412.639	2059.17	-5.08625	20.6361	1215	1215	MS2	24/104	Plasma_iTRAQ_8.raw
																gi133925809	kGHVSFkPSLDQqR	1	1	HCD	N-Term(iTRAQ4plex), K1(iTRAQ4plex), K7(iTRAQ4plex), Q13(Deamidated)	61.24	4.52152	1	1	7190	Unique	Used	0.808354	5	412.836	2060.15	-5.88724	21.0408	1255	1255	MS2	23/104	Plasma_iTRAQ_8.raw
																gi133925809	kGHVSFkPSLDQQR	1	1	HCD	N-Term(iTRAQ4plex), K1(iTRAQ4plex), K7(iTRAQ4plex)	58.0858	4.22064	1	1	7154	Unique	Used	1.44005	2	1030.09	2059.18	0.105641	20.5619	1209	1209	MS2	18/26	Plasma_iTRAQ_8.raw
																gi133925809	lVDEDMNSFk	1	1	HCD	N-Term(iTRAQ4plex), K10(iTRAQ4plex)	57.2157	4.89057	1	1	15212	Unique	Used	1.35681	2	743.379	1485.75	0.326057	43.1514	3877	3877	MS2	17/18	Plasma_iTRAQ_4.raw
																gi133925809	lVDEDMnSFk	1	1	HCD	N-Term(iTRAQ4plex), N7(Deamidated), K10(iTRAQ4plex)	57.9757	4.79313	1	1	17799	Unique	Used	1.41506	2	743.871	1486.73	0.485204	36.0453	3231	3231	MS2	17/18	Plasma_iTRAQ_3.raw
																gi133925809	lVDEDMNSFk	1	1	HCD	N-Term(iTRAQ4plex), K10(iTRAQ4plex)	53.9121	4.74841	1	1	18262	Unique	Used	1.25413	2	743.38	1485.75	1.31198	40.598	3747	3747	MS2	17/18	Plasma_iTRAQ_3.raw
																gi133925809	lVDEDMnSFk	1	1	HCD	N-Term(iTRAQ4plex), N7(Deamidated), K10(iTRAQ4plex)	50.0131	4.51363	1	1	14817	Unique	Used	1.24434	2	743.872	1486.74	2.29154	39.0792	3446	3446	MS2	16/18	Plasma_iTRAQ_4.raw
																gi133925809	lVDEDMNSFk	1	1	HCD	N-Term(iTRAQ4plex), K10(iTRAQ4plex)	65.705	4.46856	1	1	18182	Unique	Used	1.36797	2	743.379	1485.75	0.408218	39.72	3657	3657	MS2	17/18	Plasma_iTRAQ_3.raw
																gi133925809	lVDEDMnSFk	1	1	HCD	N-Term(iTRAQ4plex), N7(Deamidated), K10(iTRAQ4plex)	52.3377	4.34222	1	1	18648	Unique	Used	1.42114	2	743.871	1486.74	0.977841	44.2149	4170	4170	MS2	17/18	Plasma_iTRAQ_3.raw
																gi133925809	lVDEDmnSFk	1	1	HCD	N-Term(iTRAQ4plex), M6(Oxidation), N7(Deamidated), K10(iTRAQ4plex)	18.5263	3.35875	1	1	16893	Unique	Used	1.30359	2	751.868	1502.73	-0.603901	27.669	2240	2240	MS2	13/18	Plasma_iTRAQ_3.raw
																gi133925809	lVDEDmNSFk	1	1	HCD	N-Term(iTRAQ4plex), M6(Oxidation), K10(iTRAQ4plex)	40.1184	3.31916	1	1	16736	Unique	Used	1.14053	2	751.376	1501.75	0.61979	26.4612	2073	2073	MS2	16/18	Plasma_iTRAQ_3.raw
																gi133925809	sLPEGVAnGIEVYSTk	1	1	HCD	N-Term(iTRAQ4plex), N8(Deamidated), K16(iTRAQ4plex)	110.141	6.00845	1	1	15669	Unique	Used	1.20006	2	977.025	1953.04	-0.0182198	47.8028	4375	4375	MS2	23/30	Plasma_iTRAQ_4.raw
																gi133925809	sLPEGVAnGIEVYSTk	1	1	HCD	N-Term(iTRAQ4plex), N8(Deamidated), K16(iTRAQ4plex)	45.903	4.18444	1	1	18843	Unique	Used	1.11566	3	651.684	1953.04	-1.61893	46.1944	4385	4385	MS2	18/60	Plasma_iTRAQ_3.raw
																gi133925809	sTSIVIMLTDGDANVGESRPEk	1	1	HCD	N-Term(iTRAQ4plex), K22(iTRAQ4plex)	138.682	8.65713	1	1	16030	Unique	Used	1.04778	3	869.792	2607.36	2.73832	49.7005	4501	4501	MS2	37/84	Plasma_iTRAQ_6.raw
																gi133925809	sTSIVIMLTDGDANVGESRPEk	1	1	HCD	N-Term(iTRAQ4plex), K22(iTRAQ4plex)	130.738	8.58809	1	1	15680	Unique	Used	1.31418	3	869.795	2607.37	6.10917	49.945	4450	4450	MS2	35/84	Plasma_iTRAQ_5.raw
																gi133925809	sTSIVIMLTDGDANVGESRPEk	1	1	HCD	N-Term(iTRAQ4plex), K22(iTRAQ4plex)	120.703	8.04636	1	1	16056	Unique	Used	1.19836	3	869.793	2607.37	4.35352	54.0332	4883	4883	MS2	37/84	Plasma_iTRAQ_5.raw
																gi133925809	sTSIVImLTDGDANVGESRPEk	1	1	HCD	N-Term(iTRAQ4plex), M7(Oxidation), K22(iTRAQ4plex)	120.762	7.35771	1	1	15362	Unique	Used	1.26468	3	875.125	2623.36	4.56691	46.2321	4078	4078	MS2	22/84	Plasma_iTRAQ_5.raw
																gi133925809	sTSIVImLTDGDANVGESRPEk	1	1	HCD	N-Term(iTRAQ4plex), M7(Oxidation), K22(iTRAQ4plex)	81.212	5.92525	1	1	15379	Unique	Used	1.3344	4	656.593	2623.35	0.909026	46.4646	4099	4099	MS2	27/126	Plasma_iTRAQ_5.raw
																gi133925809	vTFELTYEELLk	1	1	HCD	N-Term(iTRAQ4plex), K12(iTRAQ4plex)	66.9456	5.6463	1	1	21103	Unique	Used	1.28824	2	887.002	1773	2.55417	67.6642	6867	6867	MS2	19/22	Plasma_iTRAQ_3.raw
																gi133925809	vTFELTYEELLk	1	1	HCD	N-Term(iTRAQ4plex), K12(iTRAQ4plex)	67.3812	5.49007	1	1	21284	Unique	Used	1.25456	2	887	1772.99	0.626383	69.6628	7076	7076	MS2	19/22	Plasma_iTRAQ_3.raw
																gi133925809	vTFELTYEELLk	1	1	HCD	N-Term(iTRAQ4plex), K12(iTRAQ4plex)	20.0672	4.63264	1	1	21221	Unique	Used	1.27561	3	591.669	1772.99	0.618799	68.8623	7000	7000	MS2	15/44	Plasma_iTRAQ_3.raw
																gi133925809	vTFELTYEELLk	1	1	HCD	N-Term(iTRAQ4plex), K12(iTRAQ4plex)	33.0782	4.54598	1	1	21071	Unique	Used	1.26525	3	591.668	1772.99	-1.34342	67.3704	6832	6832	MS2	19/44	Plasma_iTRAQ_3.raw
																gi133925809	vTFELTYEELLk	1	1	HCD	N-Term(iTRAQ4plex), K12(iTRAQ4plex)	55.8085	4.02933	1	1	21287	Unique	Used	1.42283	3	591.669	1772.99	0.2057	69.714	7080	7080	MS2	19/44	Plasma_iTRAQ_3.raw
																gi133925809	vTFELTYEELLk	1	1	HCD	N-Term(iTRAQ4plex), K12(iTRAQ4plex)	47.3904	3.75468	1	1	21504	Unique	Used	1.32985	3	591.669	1772.99	0.722073	72.1225	7324	7324	MS2	18/44	Plasma_iTRAQ_3.raw
																gi133925809	yHFVTPLTSmVVTkPEDNEDER	1	1	HCD	N-Term(iTRAQ4plex), M10(Oxidation), K14(iTRAQ4plex)	111.526	7.62362	1	1	8538	Unique	Used	0.875502	4	728.619	2911.45	5.50938	44.8555	3191	3191	MS2	25/126	Plasma_iTRAQ_8.raw
																gi133925809	yHFVTPLTSMVVTkPEDNEDER	1	1	HCD	N-Term(iTRAQ4plex), K14(iTRAQ4plex)	49.9494	7.31855	1	1	13061	Unique	Used	1.1504	4	724.615	2895.44	-2.28732	46.5851	3996	3996	MS2	27/126	Plasma_iTRAQ_7.raw
																gi133925809	yHFVTPLTSMVVTkPEDNEDER	1	1	HCD	N-Term(iTRAQ4plex), K14(iTRAQ4plex)	100.771	7.21196	1	1	13068	Unique	Used	1.38211	3	965.82	2895.45	0.584167	46.6547	4004	4004	MS2	26/84	Plasma_iTRAQ_7.raw
																gi133925809	yHFVTPLTSmVVTkPEDNEDER	1	1	HCD	N-Term(iTRAQ4plex), M10(Oxidation), K14(iTRAQ4plex)	61.6721	6.5669	1	1	12361	Unique	Used	1.16705	4	728.617	2911.45	2.90988	38.1384	3131	3131	MS2	26/126	Plasma_iTRAQ_7.raw
																gi133925809	yHFVTPLTSmVVTkPEDNEDER	1	1	HCD	N-Term(iTRAQ4plex), M10(Oxidation), K14(iTRAQ4plex)	72.3685	6.35333	1	1	12345	Unique	Used	1.07927	3	971.153	2911.44	1.61474	37.9144	3110	3110	MS2	21/84	Plasma_iTRAQ_7.raw
																gi133925809	yHFVTPLTSMVVTkPEDNEDER	1	1	HCD	N-Term(iTRAQ4plex), K14(iTRAQ4plex)	55.3934	6.28217	1	1	8825	Unique	Used	0.742745	4	724.618	2895.45	1.59135	51.7803	3692	3692	MS2	25/126	Plasma_iTRAQ_8.raw
																gi133925809	yHFVTPLTSmVVTkPEDNEDER	1	1	HCD	N-Term(iTRAQ4plex), M10(Oxidation), K14(iTRAQ4plex)	85.5692	5.23341	1	1	8532	Unique	Used	0.936277	3	971.158	2911.46	7.14917	44.7288	3182	3182	MS2	19/84	Plasma_iTRAQ_8.raw
																gi133925809	yHFVTPLTSMVVTkPEDNEDER	1	1	HCD	N-Term(iTRAQ4plex), Y1(iTRAQ4plex), K14(iTRAQ4plex)	64.9264	5.10573	1	1	8552	Unique	Used	0.644075	4	760.647	3039.57	6.49177	45.2423	3218	3218	MS2	22/126	Plasma_iTRAQ_8.raw
																gi133925809	yHFVTPLTSMVVTkPEDNEDER	1	1	HCD	N-Term(iTRAQ4plex), K14(iTRAQ4plex)	80.8978	4.77316	1	1	13069	Unique	Used	1.29903	2	1448.23	2895.45	3.4978	46.658	4005	4005	MS2	19/42	Plasma_iTRAQ_7.raw
gi13540513	OSBP2	23762	oxysterol binding protein 2 isoform a	916	101.2	1.97	1	1	1.283		S		Plasma membrane	Transporter activity;	Transport;
																gi13540513	nLSLkLDDLSTcNDLIAk	1	1	HCD	N-Term(iTRAQ4plex), K5(iTRAQ4plex), C12(Methylthio), K18(iTRAQ4plex)	1	3.68533	1	1	17096	Unique	Used	1.28264	3	818.774	2454.31	-9.26195	63.5301	5943	5943	MS2	10/68	Plasma_iTRAQ_4.raw
gi13540563	CFHR5	81494	complement factor H-related 5 precursor	569	64.4	13.71	10	6	2.114	24.3832	S		Extracellular	Complement binding;	Immune response; Complement activation;
																gi13540563	cLDPcVVSEENMNk	1	1	HCD	N-Term(iTRAQ4plex), C1(Methylthio), C5(Methylthio), K14(iTRAQ4plex)	68.5307	3.71181	1	1	20111	Unique	Used	1.54316	3	654.289	1960.85	-0.63565	58.0864	5772	5772	MS2	18/52	Plasma_iTRAQ_3.raw
																gi13540563	cLDPcVVSEEnMNk	1	1	HCD	N-Term(iTRAQ4plex), C1(Methylthio), C5(Methylthio), N11(Deamidated), K14(iTRAQ4plex)	55.0166	3.43114	1	1	20350	Unique	Used	2.0667	2	981.426	1961.84	2.82118	60.2875	6031	6031	MS2	14/26	Plasma_iTRAQ_3.raw
																gi13540563	eNYLLPEAk	1	1	HCD	N-Term(iTRAQ4plex), K9(iTRAQ4plex)	29.0838	3.68379	1	1	14339	Unique	Used	2.02651	2	682.889	1364.77	3.74764	33.9887	2924	2924	MS2	13/16	Plasma_iTRAQ_4.raw
																gi13540563	mcSFPFVk	1	1	HCD	N-Term(iTRAQ4plex), C2(Methylthio), K8(iTRAQ4plex)	23.1774	3.45704	1	1	16797	Unique	Used	2.79318	2	646.827	1292.65	1.17072	62.4657	5733	5733	MS2	12/14	Plasma_iTRAQ_5.raw
																gi13540563	scGPPPQLSnGEVk	1	1	HCD	N-Term(iTRAQ4plex), C2(Methylthio), N10(Deamidated), K14(iTRAQ4plex)	84.9361	5.35656	1	1	17347	Unique	Used	2.45271	2	874.435	1747.86	1.54478	32.0542	2743	2743	MS2	20/26	Plasma_iTRAQ_3.raw
																gi13540563	scGPPPQLSnGEVk	1	1	HCD	N-Term(iTRAQ4plex), C2(Methylthio), N10(Deamidated), K14(iTRAQ4plex)	48.0695	4.96782	1	1	14373	Unique	Used	2.08971	2	874.436	1747.87	3.29076	34.3484	2961	2961	MS2	19/26	Plasma_iTRAQ_4.raw
																gi13540563	scGPPPQLSnGEVk	1	1	HCD	N-Term(iTRAQ4plex), C2(Methylthio), N10(Deamidated), K14(iTRAQ4plex)	82.9569	4.7731	1	1	17451	Unique	Used	2.15528	2	874.435	1747.86	2.10349	32.9732	2855	2855	MS2	21/26	Plasma_iTRAQ_3.raw
																gi13540563	scGPPPQLSnGEVk	1	1	HCD	N-Term(iTRAQ4plex), C2(Methylthio), N10(Deamidated), K14(iTRAQ4plex)	23.7035	3.45953	1	1	17366	Unique	Used	1.18119	3	583.296	1747.87	7.12423	32.2313	2763	2763	MS2	18/52	Plasma_iTRAQ_3.raw
																gi13540563	tGDAVEFQck	1	1	HCD	N-Term(iTRAQ4plex), C9(Methylthio), K10(iTRAQ4plex)	22.3152	3.76778	1	1	17486	Unique	Used	1.93928	2	716.347	1431.69	1.6325	33.3235	2894	2894	MS2	13/18	Plasma_iTRAQ_3.raw
																gi13540563	wNPEVDcTEk	1	1	HCD	N-Term(iTRAQ4plex), C7(Methylthio), K10(iTRAQ4plex)	54.023	3.36515	1	1	18513	Unique	Used	2.96019	2	777.864	1554.72	1.9438	42.9907	4023	4023	MS2	14/18	Plasma_iTRAQ_3.raw
gi14211536	NRXN2	9379	neurexin 2 isoform alpha-1 precursor	1712	184.9	0.88	1	1	1.063		S	T	Plasma membrane	Receptor activity;	Cell recognition;
																gi14211536	nLRqHAGIGHAmVNk	1	1	HCD	N-Term(iTRAQ4plex), Q4(Deamidated), M12(Oxidation), K15(iTRAQ4plex)	1	3.44466	1	1	13989	Unique	Used	1.06301	3	651.03	1951.08	11.7688	75.7025	5094	5094	MS2	11/56	Plasma_iTRAQ_1_3.raw
gi145275213	F12	2161	coagulation factor XII precursor	615	67.7	26.5	33	13	1.742	14.7431	S		Extracellular	Peptidase activity;	Protein metabolism;
																gi145275213	aEEHTVVLTVTGEPcHFPFQYHR	1	1	HCD	N-Term(iTRAQ4plex), C15(Methylthio)	300	9.24618	1	1	13403	Unique	Used	1.30829	3	963.134	2887.39	3.15463	51.0245	4436	4436	MS2	36/88	Plasma_iTRAQ_7.raw
																gi145275213	aEEHTVVLTVTGEPcHFPFQYHR	1	1	HCD	N-Term(iTRAQ4plex), C15(Methylthio)	67.3265	6.91478	1	1	9026	Unique	Used	1.22473	4	722.602	2887.39	3.50933	56.4322	4033	4033	MS2	28/132	Plasma_iTRAQ_8.raw
																gi145275213	aEEHTVVLTVTGEPcHFPFQYHR	1	1	HCD	N-Term(iTRAQ4plex), C15(Methylthio)	103.625	6.39108	1	1	9019	Unique	Used	3.53595	5	578.283	2887.39	2.87052	56.3659	4025	4025	MS2	30/176	Plasma_iTRAQ_8.raw
																gi145275213	aEEHTVVLTVTGEPcHFPFQyHR	1	1	HCD	N-Term(iTRAQ4plex), C15(Methylthio), Y21(iTRAQ4plex)	73.0455	5.85775	1	1	8773	Unique	Used	1.42809	5	607.105	3031.5	5.48834	50.5129	3600	3600	MS2	27/176	Plasma_iTRAQ_8.raw
																gi145275213	aEEHTVVLTVTGEPcHFPFQyHR	1	1	HCD	N-Term(iTRAQ4plex), C15(Methylthio), Y21(iTRAQ4plex)	44.4774	5.48985	1	1	8775	Unique	Used	1.4578	4	758.629	3031.49	4.14383	50.5476	3603	3603	MS2	24/132	Plasma_iTRAQ_8.raw
																gi145275213	aEEHTVVLTVTGEPcHFPFQYHR	1	1	HCD	N-Term(iTRAQ4plex), C15(Methylthio)	82.5814	5.10889	1	1	13395	Unique	Used	1.02661	4	722.603	2887.39	4.01665	50.9539	4427	4427	MS2	28/132	Plasma_iTRAQ_7.raw
																gi145275213	cFEPQLLR	1	1	HCD	N-Term(iTRAQ4plex), C1(Methylthio)	12.0162	3.50844	1	1	19157	Unique	Used	2.11831	2	598.307	1195.61	-1.42877	49.3468	4713	4713	MS2	13/14	Plasma_iTRAQ_2.raw
																gi145275213	gRPGPQPWcATTPNFDqDQR	1	1	HCD	N-Term(iTRAQ4plex), C9(Methylthio), Q17(Deamidated)	11.3024	6.72624	1	1	15221	Unique	Used	1.90704	3	821.381	2462.13	7.59217	40.9571	3554	3554	MS2	23/76	Plasma_iTRAQ_6.raw
																gi145275213	gRPGPQPWcATTPNFDQDQR	1	1	HCD	N-Term(iTRAQ4plex), C9(Methylthio)	2.90485	6.54982	1	1	15091	Unique	Used	1.24464	3	821.054	2461.15	8.8629	39.5684	3401	3401	MS2	21/76	Plasma_iTRAQ_6.raw
																gi145275213	lHEAFSPVSYQHDLALLR	1	1	HCD	N-Term(iTRAQ4plex)	119.864	8.90882	1	1	13298	Unique	Used	1.47976	3	747.406	2240.2	3.5999	49.7754	4306	4306	MS2	31/68	Plasma_iTRAQ_7.raw
																gi145275213	lHEAFSPVSYQHDLALLR	1	1	HCD	N-Term(iTRAQ4plex)	109.903	8.53109	1	1	8967	Unique	Used	1.49149	3	747.406	2240.2	3.5999	55.1228	3934	3934	MS2	31/68	Plasma_iTRAQ_8.raw
																gi145275213	lHEAFSPVSyQHDLALLR	1	1	HCD	N-Term(iTRAQ4plex), Y10(iTRAQ4plex)	125.053	7.12045	1	1	8671	Unique	Used	1.46928	3	795.441	2384.31	5.42509	47.9892	3419	3419	MS2	27/68	Plasma_iTRAQ_8.raw
																gi145275213	lHEAFSPVSyQHDLALLR	1	1	HCD	N-Term(iTRAQ4plex), Y10(iTRAQ4plex)	59.8379	6.50797	1	1	8663	Unique	Used	1.76607	5	477.667	2384.3	3.26353	47.83	3406	3406	MS2	27/136	Plasma_iTRAQ_8.raw
																gi145275213	lHEAFSPVSYQHDLALLR	1	1	HCD	N-Term(iTRAQ4plex)	99.6105	6.44007	1	1	13306	Unique	Used	1.63475	2	1120.61	2240.2	4.64122	49.848	4315	4315	MS2	22/34	Plasma_iTRAQ_7.raw
																gi145275213	lHEAFSPVSYQHDLALLR	1	1	HCD	N-Term(iTRAQ4plex)	36.0232	6.35399	1	1	13290	Unique	Used	1.41109	4	560.804	2240.19	-0.547403	49.6997	4297	4297	MS2	27/102	Plasma_iTRAQ_7.raw
																gi145275213	lHEAFSPVSYQHDLALLR	1	1	HCD	N-Term(iTRAQ4plex)	86.1742	6.30092	1	1	8963	Unique	Used	1.94162	4	560.803	2240.19	-1.74621	55.047	3928	3928	MS2	30/102	Plasma_iTRAQ_8.raw
																gi145275213	lHEAFSPVSyQHDLALLR	1	1	HCD	N-Term(iTRAQ4plex), Y10(iTRAQ4plex)	79.8907	6.2175	1	1	8662	Unique	Used	1.61177	4	596.832	2384.31	3.67875	47.8024	3404	3404	MS2	34/102	Plasma_iTRAQ_8.raw
																gi145275213	lHEAFSPVSYqHDLALLR	1	1	HCD	N-Term(iTRAQ4plex), Q11(Deamidated)	79.2062	6.1772	1	1	13583	Unique	Used	1.78379	4	561.051	2241.18	1.90063	53.2907	4665	4665	MS2	31/102	Plasma_iTRAQ_7.raw
																gi145275213	lHEAFSPVSyqHDLALLR	1	1	HCD	N-Term(iTRAQ4plex), Y10(iTRAQ4plex), Q11(Deamidated)	41.646	5.19876	1	1	8793	Unique	Used	1.43843	5	477.862	2385.28	-0.822155	50.9871	3635	3635	MS2	26/136	Plasma_iTRAQ_8.raw
																gi145275213	lHEAFSPVSyQHDLALLR	1	1	HCD	N-Term(iTRAQ4plex), Y10(iTRAQ4plex)	16.3365	4.80911	1	1	12579	Unique	Used	1.4524	4	596.831	2384.3	1.93804	40.4971	3390	3390	MS2	27/102	Plasma_iTRAQ_7.raw
																gi145275213	lTLQGIISWGSGcGDR	1	1	HCD	N-Term(iTRAQ4plex), C13(Methylthio)	35.2188	5.035	1	1	21954	Unique	Used	1.8648	2	926.965	1852.92	3.35355	76.1379	7780	7780	MS2	22/30	Plasma_iTRAQ_2.raw
																gi145275213	lTLQGIISWGSGcGDR	1	1	HCD	N-Term(iTRAQ4plex), C13(Methylthio)	91.0678	4.81932	1	1	21957	Unique	Used	2.00782	3	618.311	1852.92	0.711096	76.1575	7783	7783	MS2	23/60	Plasma_iTRAQ_2.raw
																gi145275213	nkPGVYTDVAYYLAWIR	1	1	HCD	N-Term(iTRAQ4plex), K2(iTRAQ4plex)	86.2941	7.46212	1	1	17774	Unique	Used	1.59945	3	773.093	2317.26	2.09749	71.0603	6667	6667	MS2	26/64	Plasma_iTRAQ_6.raw
																gi145275213	nkPGVYTDVAYYLAWIR	1	1	HCD	N-Term(iTRAQ4plex), K2(iTRAQ4plex)	73.295	6.57331	1	1	17703	Unique	Used	1.70807	3	773.093	2317.26	2.17651	69.8382	6564	6564	MS2	25/64	Plasma_iTRAQ_6.raw
																gi145275213	nkPGVYTDVAYYLAWIREHTVS	1	1	HCD	N-Term(iTRAQ4plex), K2(iTRAQ4plex)	62.4442	4.99805	1	1	14833	Unique	Used	0.690893	4	718.383	2870.51	0.325566	73.2221	6429	6429	MS2	24/126	Plasma_iTRAQ_7.raw
																gi145275213	nPDNDIRPWcFVLNR	1	1	HCD	N-Term(iTRAQ4plex), C10(Methylthio)	20.1196	3.19496	1	1	17123	Unique	Used	1.98124	2	1025	2048.99	0.317131	62.0085	5813	5813	MS2	14/28	Plasma_iTRAQ_6.raw
																gi145275213	nWGLGGHAFcR	1	1	HCD	N-Term(iTRAQ4plex), C10(Methylthio)	60.4756	5.05608	1	1	14845	Unique	Used	2.74844	3	469.892	1407.66	6.17516	37.0749	3120	3120	MS2	24/40	Plasma_iTRAQ_6.raw
																gi145275213	rLTLQGIISWGSGcGDR	1	1	HCD	N-Term(iTRAQ4plex), C14(Methylthio)	12.6704	3.72579	1	1	17335	Unique	Used	1.12568	3	670.346	2009.02	3.27616	64.5222	6075	6075	MS2	18/64	Plasma_iTRAQ_6.raw
																gi145275213	tTLSGAPcQPWASEATYR	1	1	HCD	N-Term(iTRAQ4plex), C8(Methylthio)	92.0659	6.14715	1	1	19754	Unique	Used	2.38631	2	1065	2128.99	1.58817	54.7318	5361	5361	MS2	24/34	Plasma_iTRAQ_2.raw
																gi145275213	tTLSGAPcQPWASEATYR	1	1	HCD	N-Term(iTRAQ4plex), C8(Methylthio)	18.2761	3.8562	1	1	19744	Unique	Used	0.995484	3	710.338	2129	3.15862	54.6463	5350	5350	MS2	16/68	Plasma_iTRAQ_2.raw
																gi145275213	vVGGLVALR	1	1	HCD	N-Term(iTRAQ4plex)	50.9317	3.57691	1	1	17970	Unique	Used	1.5613	1	1027.68	1027.68	1.02447	38.1429	3416	3416	MS2	16/16	Plasma_iTRAQ_2.raw
																gi145275213	ykAEEHTVVLTVTGEPcHFPFQYHR	1	1	HCD	N-Term(iTRAQ4plex), K2(iTRAQ4plex), C17(Methylthio)	31.8239	6.08986	1	1	9009	Unique	Used	2.95619	5	665.337	3322.66	6.06505	56.1635	4009	4009	MS2	27/192	Plasma_iTRAQ_8.raw
																gi145275213	ykAEEHTVVLTVTGEPcHFPFQyHR	1	1	HCD	N-Term(iTRAQ4plex), K2(iTRAQ4plex), C17(Methylthio), Y23(iTRAQ4plex)	15.3287	5.17686	1	1	8795	Unique	Used	1.18084	6	578.63	3466.74	0.488586	51.0191	3638	3638	MS2	26/240	Plasma_iTRAQ_8.raw
gi14550407	C2	717	complement component 2 isoform 1 preproprotein	752	83.2	32.85	22	9	1.481	10.6453	S		Extracellular	Complement activity;	Immune response;
																gi14550407	aVISPGFDVFAk	2	1	HCD	N-Term(iTRAQ4plex), K12(iTRAQ4plex)	73.3875	4.7293	1	1	16849	Unique	Used	1.42951	2	769.945	1538.88	0.62184	60.428	5667	5667	MS2	17/22	Plasma_iTRAQ_4.raw
																gi14550407	aVISPGFDVFAk	2	1	HCD	N-Term(iTRAQ4plex), K12(iTRAQ4plex)	45.2333	4.09037	1	1	16861	Unique	Used	1.27387	3	513.633	1538.89	2.19958	60.5714	5680	5680	MS2	20/44	Plasma_iTRAQ_4.raw
																gi14550407	cPAPVSFEnGIYTPR	1	1	HCD	N-Term(iTRAQ4plex), C1(Methylthio), N9(Deamidated)	45.8531	4.83731	1	1	19990	Unique	Used	2.13178	2	921.441	1841.88	3.65188	56.8535	5616	5616	MS2	19/28	Plasma_iTRAQ_2.raw
																gi14550407	cPAPVSFEnGIYTPR	1	1	HCD	N-Term(iTRAQ4plex), C1(Methylthio), N9(Deamidated)	39.212	4.34124	1	1	16937	Unique	Used	2.08765	3	614.628	1841.87	-0.199377	61.5773	5767	5767	MS2	20/56	Plasma_iTRAQ_4.raw
																gi14550407	cPAPVSFEnGIYTPR	1	1	HCD	N-Term(iTRAQ4plex), C1(Methylthio), N9(Deamidated)	65.2958	4.31034	1	1	20019	Unique	Used	1.46332	3	614.628	1841.87	0.794752	57.138	5648	5648	MS2	20/56	Plasma_iTRAQ_2.raw
																gi14550407	cPAPVSFEnGIYTPR	1	1	HCD	N-Term(iTRAQ4plex), C1(Methylthio), N9(Deamidated)	36.0431	3.86881	1	1	16842	Unique	Used	1.7774	3	614.629	1841.87	2.38535	60.3286	5659	5659	MS2	16/56	Plasma_iTRAQ_4.raw
																gi14550407	cSSNLVLTGSSER	2	1	HCD	N-Term(iTRAQ4plex), C1(Methylthio)	42.0458	4.9344	1	1	14530	Unique	Used	1.78782	2	771.874	1542.74	2.33158	36.0993	3134	3134	MS2	19/24	Plasma_iTRAQ_4.raw
																gi14550407	cSSNLVLTGSSER	2	1	HCD	N-Term(iTRAQ4plex), C1(Methylthio)	38.8679	4.74478	1	1	17362	Unique	Used	1.80331	2	771.877	1542.75	5.57571	32.7006	2760	2760	MS2	18/24	Plasma_iTRAQ_2.raw
																gi14550407	dMTEVISSLENANYk	2	1	HCD	N-Term(iTRAQ4plex), K15(iTRAQ4plex)	59.6783	4.79826	1	1	20722	Unique	Used	1.37754	3	668.006	2002	-0.214786	63.7094	6415	6415	MS2	22/56	Plasma_iTRAQ_2.raw
																gi14550407	eILNINQk	2	1	HCD	N-Term(iTRAQ4plex), K8(iTRAQ4plex)	5.03491	3.62325	1	1	13693	Unique	Used	1.30897	2	630.384	1259.76	4.04106	28.0949	2230	2230	MS2	14/14	Plasma_iTRAQ_4.raw
																gi14550407	eVVTDQFLcSGTQEDESPck	2	1	HCD	N-Term(iTRAQ4plex), C9(Methylthio), C19(Methylthio), K20(iTRAQ4plex)	136.945	6.74875	1	1	20299	Unique	Used	1.84621	3	865.717	2595.14	1.03222	59.6085	5952	5952	MS2	27/76	Plasma_iTRAQ_2.raw
																gi14550407	lLGMETMAWQEIR	2	1	HCD	N-Term(iTRAQ4plex)	47.8337	5.82995	1	1	21106	Unique	Used	1.57568	2	861.446	1721.89	0.84388	67.4247	6837	6837	MS2	20/24	Plasma_iTRAQ_2.raw
																gi14550407	lLGmETMAWQEIR	2	1	HCD	N-Term(iTRAQ4plex), M4(Oxidation)	69.824	4.49657	1	1	20143	Unique	Used	1.50672	2	869.439	1737.87	-5.01805	58.1647	5780	5780	MS2	19/24	Plasma_iTRAQ_2.raw
																gi14550407	lLGMETmAWQEIR	2	1	HCD	N-Term(iTRAQ4plex), M7(Oxidation)	41.9447	4.10133	1	1	20563	Unique	Used	1.53371	2	869.445	1737.88	2.14655	62.2029	6241	6241	MS2	18/24	Plasma_iTRAQ_2.raw
																gi14550407	lLGmETmAWQEIR	2	1	HCD	N-Term(iTRAQ4plex), M4(Oxidation), M7(Oxidation)	25.4456	3.61578	1	1	19639	Unique	Used	1.49362	2	877.443	1753.88	3.14705	53.7272	5237	5237	MS2	16/24	Plasma_iTRAQ_2.raw
																gi14550407	lLGMETMAWQEIR	2	1	HCD	N-Term(iTRAQ4plex)	22.8453	3.61014	1	1	21110	Unique	Used	1.38947	3	574.632	1721.88	-1.53886	67.4516	6841	6841	MS2	21/48	Plasma_iTRAQ_2.raw
																gi14550407	nDYLDIYAIGVGk	2	1	HCD	N-Term(iTRAQ4plex), K13(iTRAQ4plex)	71.8197	5.80246	1	1	20189	Unique	Used	1.17547	2	864.976	1728.94	1.68891	58.5667	5830	5830	MS2	19/24	Plasma_iTRAQ_2.raw
																gi14550407	nDYLDIYAIGVGk	2	1	HCD	N-Term(iTRAQ4plex), N1(Deamidated), K13(iTRAQ4plex)	70.9712	5.62548	1	1	20438	Unique	Used	1.32146	2	865.469	1729.93	3.3773	60.9739	6105	6105	MS2	17/24	Plasma_iTRAQ_2.raw
																gi14550407	nDYLDIYAIGVGk	2	1	HCD	N-Term(iTRAQ4plex), K13(iTRAQ4plex)	50.345	3.78605	1	1	20188	Unique	Used	1.20302	3	576.985	1728.94	-0.93122	58.5607	5829	5829	MS2	21/48	Plasma_iTRAQ_2.raw
																gi14550407	vLMSVLNDNSR	2	1	HCD	N-Term(iTRAQ4plex)	28.5473	4.19119	1	1	18586	Unique	Used	1.43043	2	696.376	1391.74	0.321692	43.4611	4078	4078	MS2	17/20	Plasma_iTRAQ_2.raw
																gi14550407	vLMSVLNDnSR	2	1	HCD	N-Term(iTRAQ4plex), N9(Deamidated)	17.0382	3.66443	1	1	18997	Unique	Used	1.28008	2	696.868	1392.73	1.01747	47.9236	4540	4540	MS2	15/20	Plasma_iTRAQ_2.raw
																gi14550407	vLmSVLNDnSR	2	1	HCD	N-Term(iTRAQ4plex), M3(Oxidation), N9(Deamidated)	27.5909	3.43059	1	1	17689	Unique	Used	1.30699	2	704.865	1408.72	0.889487	35.7723	3115	3115	MS2	16/20	Plasma_iTRAQ_2.raw
gi145701025	MEGF8	1954	multiple epidermal growth factor-like domains protein 8	2778	295.7	0.47	1	1	1.313			T	Plasma membrane	Cell adhesion molecule activity;	Cell communication; Signal transduction;
																gi145701025	tLQPGDGEASTPR	1	1	HCD	N-Term(iTRAQ4plex)	45.1689	4.41437	1	1	14557	Unique	Used	1.31298	2	736.878	1472.75	1.19376	20.1178	1205	1205	MS2	17/24	Plasma_iTRAQ_1.raw
gi149408122	DHX58	79132	probable ATP-dependent RNA helicase DHX58	678	76.6	3.54	1	1	1.396				Cytoplasm	Nucleotide binding;	Regulation of nucleobase, nucleoside, nucleotide and nucleic acid metabolism;
																gi149408122	lqRAQPLPQVLGLTASPGTGGASk	1	1	HCD	N-Term(iTRAQ4plex), Q2(Deamidated), K24(iTRAQ4plex)	1	3.47248	1	1	22083	Unique	Used	1.3964	3	879.495	2636.47	-9.84367	78.0857	7974	7974	MS2	11/92	Plasma_iTRAQ_3.raw
gi153082722	ICAM2	3384	intercellular adhesion molecule 2 precursor	275	30.6	11.27	3	2	1.168	5.12462	S	T	Plasma membrane	Cell adhesion molecule activity;	Cell communication; Signal transduction;
																gi153082722	qVILTLQPTLVAVGk	1	1	HCD	N-Term(iTRAQ4plex), K15(iTRAQ4plex)	90.1922	5.41917	1	1	20384	Unique	Used	1.14516	2	934.595	1868.18	0.556641	60.6269	6069	6069	MS2	19/28	Plasma_iTRAQ_3.raw
																gi153082722	qVILTLQPTLVAVGk	1	1	HCD	N-Term(iTRAQ4plex), K15(iTRAQ4plex)	74.6818	4.70796	1	1	20409	Unique	Used	1.27909	3	623.397	1868.18	-2.42361	60.8615	6096	6096	MS2	22/56	Plasma_iTRAQ_3.raw
																gi153082722	vPTVEPLDSLTLFLFR	1	1	HCD	N-Term(iTRAQ4plex)	81.3843	5.21987	1	1	22095	Unique	Used	1.12563	2	996.072	1991.14	1.35184	77.6026	7939	7939	MS2	19/30	Plasma_iTRAQ_2.raw
gi153252081	RNASE7	84659	ribonuclease, RNase A family, 7 precursor	156	17.4	12.18	1	1	1.47		S		Extracellular	Ribonuclease activity;	Immune response;
																gi153252081	nGDkncHqSHGAVSLTmck	1	1	HCD	N-Term(iTRAQ4plex), K4(iTRAQ4plex), N5(Deamidated), C6(Methylthio), Q8(Deamidated), M17(Oxidation), C18(Methylthio), K19(iTRAQ4plex)	6.8292	3.77938	1	1	12707	Unique	Used	1.46967	3	858.059	2572.16	6.62401	73.7438	4942	4942	MS2	9/72	Plasma_iTRAQ_4_6.raw
gi153266841	APOH	350	apolipoprotein H precursor	345	38.3	68.12	320	18	1.353	8.99864	S		Extracellular	Transporter activity;	Transport;
																gi153266841	aTFGcHDGYSLDGPEEIEcTk	1	1	HCD	N-Term(iTRAQ4plex), C5(Methylthio), C19(Methylthio), K21(iTRAQ4plex)	148.754	9.34601	1	1	12779	Unique	Used	1.47633	3	884.717	2652.14	1.85218	74.8484	5026	5026	MS2	30/80	Plasma_iTRAQ_4_6.raw
																gi153266841	aTFGcHDGYSLDGPEEIEcTk	1	1	HCD	N-Term(iTRAQ4plex), C5(Methylthio), C19(Methylthio), K21(iTRAQ4plex)	142.386	9.34355	1	1	19102	Unique	Used	1.53796	3	884.719	2652.14	3.57819	89.398	8247	8247	MS2	30/80	Plasma_iTRAQ_6.raw
																gi153266841	aTFGcHDGYSLDGPEEIEcTk	1	1	HCD	N-Term(iTRAQ4plex), C5(Methylthio), C19(Methylthio), K21(iTRAQ4plex)	300	9.28589	1	1	10898	Unique	Used	1.81208	3	884.718	2652.14	2.61163	44.5069	2864	2864	MS2	34/80	Plasma_iTRAQ_4_6.raw
																gi153266841	aTFGcHDGYSLDGPEEIEcTk	1	1	HCD	N-Term(iTRAQ4plex), C5(Methylthio), C19(Methylthio), K21(iTRAQ4plex)	152.556	9.20483	1	1	12575	Unique	Used	1.45693	3	884.716	2652.13	0.747529	71.8461	4795	4795	MS2	30/80	Plasma_iTRAQ_4_6.raw
																gi153266841	aTFGcHDGYSLDGPEEIEcTk	1	1	HCD	N-Term(iTRAQ4plex), C5(Methylthio), C19(Methylthio), K21(iTRAQ4plex)	300	9.17315	1	1	10680	Unique	Used	1.73314	3	884.718	2652.14	2.12834	40.6742	2599	2599	MS2	36/80	Plasma_iTRAQ_4_6.raw
																gi153266841	aTFGcHDGYSLDGPEEIEcTk	1	1	HCD	N-Term(iTRAQ4plex), C5(Methylthio), C19(Methylthio), K21(iTRAQ4plex)	300	9.07131	1	1	10528	Unique	Used	1.47873	3	884.718	2652.14	2.19738	38.118	2421	2421	MS2	34/80	Plasma_iTRAQ_4_6.raw
																gi153266841	aTFGcHDGYSLDGPEEIEcTk	1	1	HCD	N-Term(iTRAQ4plex), C5(Methylthio), C19(Methylthio), K21(iTRAQ4plex)	153.525	9.03995	1	1	10611	Unique	Used	1.74209	3	884.718	2652.14	2.33546	39.4903	2517	2517	MS2	32/80	Plasma_iTRAQ_4_6.raw
																gi153266841	aTFGcHDGYSLDGPEEIEcTk	1	1	HCD	N-Term(iTRAQ4plex), C5(Methylthio), C19(Methylthio), K21(iTRAQ4plex)	134.143	9.03177	1	1	13785	Unique	Used	1.74271	3	884.717	2652.14	1.02369	90.6848	6213	6213	MS2	32/80	Plasma_iTRAQ_4_6.raw
																gi153266841	aTFGcHDGYSLDGPEEIEcTk	1	1	HCD	N-Term(iTRAQ4plex), C5(Methylthio), C19(Methylthio), K21(iTRAQ4plex)	300	8.91693	1	1	10826	Unique	Used	1.5247	3	884.718	2652.14	2.4045	43.2488	2777	2777	MS2	34/80	Plasma_iTRAQ_4_6.raw
																gi153266841	aTFGcHDGYSLDGPEEIEcTk	1	1	HCD	N-Term(iTRAQ4plex), C5(Methylthio), C19(Methylthio), K21(iTRAQ4plex)	142.733	8.88886	1	1	10967	Unique	Used	1.50825	3	884.718	2652.14	1.92122	45.7285	2947	2947	MS2	36/80	Plasma_iTRAQ_4_6.raw
																gi153266841	aTFGcHDGYSLDGPEEIEcTk	1	1	HCD	N-Term(iTRAQ4plex), C5(Methylthio), C19(Methylthio), K21(iTRAQ4plex)	144.775	8.78275	1	1	10382	Unique	Used	1.81613	3	884.717	2652.14	1.7141	35.6696	2252	2252	MS2	32/80	Plasma_iTRAQ_4_6.raw
																gi153266841	aTFGcHDGYSLDGPEEIEcTk	1	1	HCD	N-Term(iTRAQ4plex), C5(Methylthio), C19(Methylthio), K21(iTRAQ4plex)	143.635	8.77979	1	1	16263	Unique	Used	1.72042	3	884.719	2652.14	3.37107	52.1688	4774	4774	MS2	34/80	Plasma_iTRAQ_6.raw
																gi153266841	aTFGcHDGYSLDGPEEIEcTk	1	1	HCD	N-Term(iTRAQ4plex), C5(Methylthio), C19(Methylthio), K21(iTRAQ4plex)	142.064	8.73944	1	1	10456	Unique	Used	1.41929	3	884.717	2652.14	1.85218	36.8561	2334	2334	MS2	33/80	Plasma_iTRAQ_4_6.raw
																gi153266841	aTFGcHDGYSLDGPEEIEcTk	1	1	HCD	N-Term(iTRAQ4plex), C5(Methylthio), C19(Methylthio), K21(iTRAQ4plex)	153.525	8.71622	1	1	10751	Unique	Used	1.67264	3	884.718	2652.14	2.33546	41.9126	2684	2684	MS2	34/80	Plasma_iTRAQ_4_6.raw
																gi153266841	aTFGcHDGYSLDGPEEIEcTk	1	1	HCD	N-Term(iTRAQ4plex), C5(Methylthio), C19(Methylthio), K21(iTRAQ4plex)	300	8.68569	1	1	16591	Unique	Used	1.93407	3	884.718	2652.14	2.61163	55.8475	5168	5168	MS2	35/80	Plasma_iTRAQ_6.raw
																gi153266841	aTFGcHDGYSLDGPEEIEcTk	1	1	HCD	N-Term(iTRAQ4plex), C5(Methylthio), C19(Methylthio), K21(iTRAQ4plex)	145.074	8.68211	1	1	19165	Unique	Used	1.57822	3	884.717	2652.14	1.85218	90.6477	8330	8330	MS2	31/80	Plasma_iTRAQ_6.raw
																gi153266841	aTFGcHDGYSLDGPEEIEcTk	1	1	HCD	N-Term(iTRAQ4plex), C5(Methylthio), C19(Methylthio), K21(iTRAQ4plex)	300	8.68164	1	1	10224	Unique	Used	1.31069	3	884.718	2652.14	2.54258	33.0474	2071	2071	MS2	32/80	Plasma_iTRAQ_4_6.raw
																gi153266841	aTFGcHDGYSLDGPEEIEcTk	1	1	HCD	N-Term(iTRAQ4plex), C5(Methylthio), C19(Methylthio), K21(iTRAQ4plex)	154.775	8.65925	1	1	12865	Unique	Used	1.80084	3	884.717	2652.14	1.16177	76.0617	5127	5127	MS2	37/80	Plasma_iTRAQ_4_6.raw
																gi153266841	aTFGcHDGYSLDGPEEIEcTk	1	1	HCD	N-Term(iTRAQ4plex), C5(Methylthio), C19(Methylthio), K21(iTRAQ4plex)	156.536	8.65504	1	1	13482	Unique	Used	1.27023	3	884.718	2652.14	2.4045	52.0109	4536	4536	MS2	29/80	Plasma_iTRAQ_7.raw
																gi153266841	aTFGcHDGYSLDGPEEIEcTk	1	1	HCD	N-Term(iTRAQ4plex), C5(Methylthio), C19(Methylthio), K21(iTRAQ4plex)	300	8.6529	1	1	11053	Unique	Used	1.52096	3	884.717	2652.14	1.7141	47.1551	3045	3045	MS2	32/80	Plasma_iTRAQ_4_6.raw
																gi153266841	aTFGcHDGYSLDGPEEIEcTk	1	1	HCD	N-Term(iTRAQ4plex), C5(Methylthio), C19(Methylthio), K21(iTRAQ4plex)	300	8.55045	1	1	16485	Unique	Used	1.67477	3	884.717	2652.14	1.43794	54.6039	5038	5038	MS2	36/80	Plasma_iTRAQ_6.raw
																gi153266841	aTFGcHDGYSLDGPEEIEcTk	1	1	HCD	N-Term(iTRAQ4plex), C5(Methylthio), C19(Methylthio), K21(iTRAQ4plex)	143.635	8.53567	1	1	16381	Unique	Used	1.90201	3	884.718	2652.14	2.4045	53.3649	4910	4910	MS2	34/80	Plasma_iTRAQ_6.raw
																gi153266841	aTFGcHDGYSLDGPEEIEcTk	1	1	HCD	N-Term(iTRAQ4plex), C5(Methylthio), C19(Methylthio), K21(iTRAQ4plex)	137.319	8.51364	1	1	12443	Unique	Used	1.59014	3	884.717	2652.14	0.81657	69.8127	4645	4645	MS2	29/80	Plasma_iTRAQ_4_6.raw
																gi153266841	aTFGcHDGYSLDGPEEIEcTk	1	1	HCD	N-Term(iTRAQ4plex), C5(Methylthio), C19(Methylthio), K21(iTRAQ4plex)	146.758	8.48549	1	1	9766	Unique	Used	1.02409	3	884.716	2652.13	-0.0809605	25.2733	1536	1536	MS2	32/80	Plasma_iTRAQ_4_6.raw
																gi153266841	aTFGcHDGYSLDGPEEIEcTk	1	1	HCD	N-Term(iTRAQ4plex), C5(Methylthio), C19(Methylthio), K21(iTRAQ4plex)	300	8.43987	1	1	13191	Unique	Used	1.54388	3	884.72	2652.15	4.88996	81.3819	5542	5542	MS2	31/80	Plasma_iTRAQ_4_6.raw
																gi153266841	aTFGcHDGYSLDGPEEIEcTk	1	1	HCD	N-Term(iTRAQ4plex), C5(Methylthio), C19(Methylthio), K21(iTRAQ4plex)	141.693	8.43727	1	1	9850	Unique	Used	1.55427	3	884.718	2652.14	1.99026	26.7918	1639	1639	MS2	34/80	Plasma_iTRAQ_4_6.raw
																gi153266841	aTFGcHDGYSLDGPEEIEcTk	1	1	HCD	N-Term(iTRAQ4plex), C5(Methylthio), C19(Methylthio), K21(iTRAQ4plex)	107.243	8.43026	1	1	10118	Unique	Used	1.3744	3	884.717	2652.14	1.57602	31.2923	1950	1950	MS2	34/80	Plasma_iTRAQ_4_6.raw
																gi153266841	aTFGcHDGYSLDGPEEIEcTk	1	1	HCD	N-Term(iTRAQ4plex), C5(Methylthio), C19(Methylthio), K21(iTRAQ4plex)	156.536	8.40185	1	1	10011	Unique	Used	1.30383	3	884.717	2652.14	1.50698	29.5531	1828	1828	MS2	31/80	Plasma_iTRAQ_4_6.raw
																gi153266841	aTFGcHDGYSLDGPEEIEcTk	1	1	HCD	N-Term(iTRAQ4plex), C5(Methylthio), C19(Methylthio), K21(iTRAQ4plex)	154.775	8.39817	1	1	12666	Unique	Used	1.28604	3	884.717	2652.14	1.85218	73.1142	4895	4895	MS2	30/80	Plasma_iTRAQ_4_6.raw
																gi153266841	aTFGcHDGYSLDGPEEIEcTk	1	1	HCD	N-Term(iTRAQ4plex), C5(Methylthio), C19(Methylthio), K21(iTRAQ4plex)	146.758	8.39309	1	1	11969	Unique	Used	1.49357	3	884.715	2652.13	-1.25466	62.2444	4100	4100	MS2	33/80	Plasma_iTRAQ_4_6.raw
																gi153266841	aTFGcHDGYSLDGPEEIEcTk	1	1	HCD	N-Term(iTRAQ4plex), C5(Methylthio), C19(Methylthio), K21(iTRAQ4plex)	151.095	8.36303	1	1	9922	Unique	Used	1.47469	3	884.717	2652.14	0.954651	28.0567	1725	1725	MS2	33/80	Plasma_iTRAQ_4_6.raw
																gi153266841	aTFGcHDGYSLDGPEEIEcTk	1	1	HCD	N-Term(iTRAQ4plex), C5(Methylthio), C19(Methylthio), K21(iTRAQ4plex)	136.827	8.35182	1	1	12127	Unique	Used	1.6992	3	884.718	2652.14	2.54258	64.8013	4281	4281	MS2	31/80	Plasma_iTRAQ_4_6.raw
																gi153266841	aTFGcHDGYSLDGPEEIEcTk	1	1	HCD	N-Term(iTRAQ4plex), C5(Methylthio), C19(Methylthio), K21(iTRAQ4plex)	151.095	8.32832	1	1	9685	Unique	Used	1.30306	3	884.718	2652.14	2.19738	23.7301	1432	1432	MS2	32/80	Plasma_iTRAQ_4_6.raw
																gi153266841	aTFGcHDGYSLDGPEEIEcTk	1	1	HCD	N-Term(iTRAQ4plex), C5(Methylthio), C19(Methylthio), K21(iTRAQ4plex)	111.222	8.28679	1	1	13724	Unique	Used	1.43961	3	884.718	2652.14	2.26642	89.4928	6132	6132	MS2	26/80	Plasma_iTRAQ_4_6.raw
																gi153266841	aTFGcHDGYSLDGPEEIEcTk	1	1	HCD	N-Term(iTRAQ4plex), C5(Methylthio), C19(Methylthio), K21(iTRAQ4plex)	118.788	8.27744	1	1	12051	Unique	Used	1.41969	3	884.718	2652.14	1.99026	63.599	4195	4195	MS2	30/80	Plasma_iTRAQ_4_6.raw
																gi153266841	aTFGcHDGYSLDGPEEIEcTk	1	1	HCD	N-Term(iTRAQ4plex), C5(Methylthio), C19(Methylthio), K21(iTRAQ4plex)	300	8.23551	1	1	16881	Unique	Used	1.49273	3	884.719	2652.14	3.44011	59.0603	5513	5513	MS2	32/80	Plasma_iTRAQ_6.raw
																gi153266841	aTFGcHDGYSLDGPEEIEcTk	1	1	HCD	N-Term(iTRAQ4plex), C5(Methylthio), C19(Methylthio), K21(iTRAQ4plex)	118.848	8.2269	1	1	11654	Unique	Used	1.58376	3	884.717	2652.14	1.85218	57.208	3743	3743	MS2	26/80	Plasma_iTRAQ_4_6.raw
																gi153266841	aTFGcHDGYSLDGPEEIEcTk	1	1	HCD	N-Term(iTRAQ4plex), C5(Methylthio), C19(Methylthio), K21(iTRAQ4plex)	156.536	8.20289	1	1	11844	Unique	Used	1.52255	3	884.717	2652.14	1.29985	60.1861	3956	3956	MS2	33/80	Plasma_iTRAQ_4_6.raw
																gi153266841	aTFGcHDGYSLDGPEEIEcTk	1	1	HCD	N-Term(iTRAQ4plex), C5(Methylthio), C19(Methylthio), K21(iTRAQ4plex)	143.635	8.19752	1	1	16741	Unique	Used	1.44558	3	884.718	2652.14	2.95683	57.4194	5343	5343	MS2	33/80	Plasma_iTRAQ_6.raw
																gi153266841	aTFGcHDGYSLDGPEEIEcTk	1	1	HCD	N-Term(iTRAQ4plex), C5(Methylthio), C19(Methylthio), K21(iTRAQ4plex)	140.625	8.16771	1	1	12330	Unique	Used	1.62843	3	884.72	2652.14	4.47571	68.071	4516	4516	MS2	31/80	Plasma_iTRAQ_4_6.raw
																gi153266841	aTFGcHDGYSLDGPEEIEcTk	1	1	HCD	N-Term(iTRAQ4plex), C5(Methylthio), C19(Methylthio), K21(iTRAQ4plex)	300	8.16317	1	1	12217	Unique	Used	1.27293	3	884.717	2652.14	0.88561	66.325	4389	4389	MS2	33/80	Plasma_iTRAQ_4_6.raw
																gi153266841	aTFGcHDGYSLDGPEEIEcTk	1	1	HCD	N-Term(iTRAQ4plex), C5(Methylthio), C19(Methylthio), K21(iTRAQ4plex)	300	8.0003	1	1	11157	Unique	Used	1.25453	3	884.718	2652.14	1.99026	48.9557	3168	3168	MS2	31/80	Plasma_iTRAQ_4_6.raw
																gi153266841	aTFGcHDGYSLDGPEEIEcTk	1	1	HCD	N-Term(iTRAQ4plex), C5(Methylthio), C19(Methylthio), K21(iTRAQ4plex)	93.03	7.76121	1	1	9621	Unique	Used	1.47841	3	884.715	2652.13	-0.426165	22.461	1347	1347	MS2	33/80	Plasma_iTRAQ_4_6.raw
																gi153266841	aTFGcHDGYSLDGPEEIEcTk	1	1	HCD	N-Term(iTRAQ4plex), C5(Methylthio), C19(Methylthio), K21(iTRAQ4plex)	154.775	7.71014	1	1	11302	Unique	Used	1.46165	3	884.718	2652.14	2.61163	51.301	3332	3332	MS2	30/80	Plasma_iTRAQ_4_6.raw
																gi153266841	aTFGcHDGySLDGPEEIEcTk	1	1	HCD	N-Term(iTRAQ4plex), C5(Methylthio), Y9(iTRAQ4plex), C19(Methylthio), K21(iTRAQ4plex)	127.532	7.34144	1	1	12912	Unique	Used	1.74304	3	932.753	2796.24	3.49856	44.5794	3803	3803	MS2	31/80	Plasma_iTRAQ_7.raw
																gi153266841	aTFGcHDGYSLDGPEEIEcTk	1	1	HCD	N-Term(iTRAQ4plex), C5(Methylthio), C19(Methylthio), K21(iTRAQ4plex)	91.1817	7.29707	1	1	15759	Unique	Used	1.33305	3	884.717	2652.14	1.57602	46.8541	4186	4186	MS2	20/80	Plasma_iTRAQ_6.raw
																gi153266841	aTFGcHDGYSLDGPEEIEcTk	1	1	HCD	N-Term(iTRAQ4plex), C5(Methylthio), C19(Methylthio), K21(iTRAQ4plex)	147.241	7.26236	1	1	17014	Unique	Used	1.6328	3	884.718	2652.14	2.47354	60.7333	5680	5680	MS2	33/80	Plasma_iTRAQ_6.raw
																gi153266841	aTFGcHDGYSLDGPEEIEcTk	1	1	HCD	N-Term(iTRAQ4plex), C5(Methylthio), C19(Methylthio), K21(iTRAQ4plex)	89.0506	7.25825	1	1	9559	Unique	Used	1.06719	3	884.719	2652.14	3.09491	21.3013	1268	1268	MS2	31/80	Plasma_iTRAQ_4_6.raw
																gi153266841	aTFGcHDGYSLDGPEEIEcTk	1	1	HCD	N-Term(iTRAQ4plex), C5(Methylthio), C19(Methylthio), K21(iTRAQ4plex)	132.797	7.19138	1	1	17275	Unique	Used	1.64791	3	884.717	2652.14	1.64506	63.74	5997	5997	MS2	31/80	Plasma_iTRAQ_6.raw
																gi153266841	aTFGcHDGYSLDGPEEIEcTk	1	1	HCD	N-Term(iTRAQ4plex), C5(Methylthio), C19(Methylthio), K21(iTRAQ4plex)	142.644	7.03061	1	1	17165	Unique	Used	1.4794	3	884.718	2652.14	2.26642	62.499	5864	5864	MS2	34/80	Plasma_iTRAQ_6.raw
																gi153266841	aTFGcHDGYSLDGPEEIEcTk	1	1	HCD	N-Term(iTRAQ4plex), C5(Methylthio), C19(Methylthio), K21(iTRAQ4plex)	138.864	6.98245	1	1	17523	Unique	Used	1.41006	3	884.718	2652.14	2.33546	66.7506	6306	6306	MS2	34/80	Plasma_iTRAQ_6.raw
																gi153266841	aTFGcHDGYSLDGPEEIEcTk	1	1	HCD	N-Term(iTRAQ4plex), C5(Methylthio), C19(Methylthio), K21(iTRAQ4plex)	136.365	6.93208	1	1	11472	Unique	Used	1.27162	3	884.716	2652.13	0.678488	54.1672	3531	3531	MS2	32/80	Plasma_iTRAQ_4_6.raw
																gi153266841	aTFGcHDGYSLDGPEEIEcTk	1	1	HCD	N-Term(iTRAQ4plex), C5(Methylthio), C19(Methylthio), K21(iTRAQ4plex)	81.8087	6.74812	1	1	9487	Unique	Used	1.26285	3	884.717	2652.14	1.85218	20.0369	1181	1181	MS2	26/80	Plasma_iTRAQ_4_6.raw
																gi153266841	aTFGcHDGYSLDGPEEIEcTk	1	1	HCD	N-Term(iTRAQ4plex), C5(Methylthio), C19(Methylthio), K21(iTRAQ4plex)	300	6.04024	1	1	16290	Unique	Used	2.21684	2	1326.57	2652.14	0.798626	52.4111	4804	4804	MS2	23/40	Plasma_iTRAQ_6.raw
																gi153266841	aTFGcHDGYSLDGPEEIEcTk	1	1	HCD	N-Term(iTRAQ4plex), C5(Methylthio), C19(Methylthio), K21(iTRAQ4plex)	144.632	5.91227	1	1	16520	Unique	Used	1.67031	2	1326.57	2652.13	0.706572	55.0227	5081	5081	MS2	25/40	Plasma_iTRAQ_6.raw
																gi153266841	aTFGcHDGYSLDGPEEIEcTk	1	1	HCD	N-Term(iTRAQ4plex), C5(Methylthio), C19(Methylthio), K21(iTRAQ4plex)	97.6805	5.79463	1	1	11861	Unique	Used	2.52726	4	663.789	2652.13	0.742459	60.4821	3976	3976	MS2	23/120	Plasma_iTRAQ_4_6.raw
																gi153266841	aTFGcHDGYSLDGPEEIEcTk	1	1	HCD	N-Term(iTRAQ4plex), C5(Methylthio), C19(Methylthio), K21(iTRAQ4plex)	84.5379	5.63404	1	1	12833	Unique	Used	1.29062	4	663.789	2652.13	0.00602393	75.638	5090	5090	MS2	27/120	Plasma_iTRAQ_4_6.raw
																gi153266841	aTFGcHDGySLDGPEEIEcTk	1	1	HCD	N-Term(iTRAQ4plex), C5(Methylthio), Y9(iTRAQ4plex), C19(Methylthio), K21(iTRAQ4plex)	84.6785	5.32572	1	1	13027	Unique	Used	2.35925	4	699.82	2796.26	7.5973	46.1923	3955	3955	MS2	26/120	Plasma_iTRAQ_7.raw
																gi153266841	aTFGcHDGYSLDGPEEIEcTk	1	1	HCD	N-Term(iTRAQ4plex), C5(Methylthio), C19(Methylthio), K21(iTRAQ4plex)	300	5.32395	1	1	16409	Unique	Used	1.77036	2	1326.57	2652.13	0.430409	53.6372	4942	4942	MS2	25/40	Plasma_iTRAQ_6.raw
																gi153266841	aTFGcHDGYSLDGPEEIEcTk	1	1	HCD	N-Term(iTRAQ4plex), C5(Methylthio), C19(Methylthio), K21(iTRAQ4plex)	66.2787	5.18903	1	1	9386	Unique	Used	1.26907	3	884.716	2652.13	-0.0119197	18.2802	1060	1060	MS2	28/80	Plasma_iTRAQ_4_6.raw
																gi153266841	aTFGcHDGySLDGPEEIEcTk	1	1	HCD	N-Term(iTRAQ4plex), C5(Methylthio), Y9(iTRAQ4plex), C19(Methylthio), K21(iTRAQ4plex)	69.4775	5.03614	1	1	8783	Unique	Used	1.44169	4	699.816	2796.24	2.1841	50.6651	3614	3614	MS2	25/120	Plasma_iTRAQ_8.raw
																gi153266841	aTFGcHDGYSLDGPEEIEcTk	1	1	HCD	N-Term(iTRAQ4plex), C5(Methylthio), C19(Methylthio), K21(iTRAQ4plex)	300	5.02797	1	1	13507	Unique	Used	1.91717	2	1326.57	2652.14	2.08738	52.3225	4568	4568	MS2	24/40	Plasma_iTRAQ_7.raw
																gi153266841	aTFGcHDGySLDGPEEIEcTk	1	1	HCD	N-Term(iTRAQ4plex), C5(Methylthio), Y9(iTRAQ4plex), C19(Methylthio), K21(iTRAQ4plex)	139.376	5.00397	1	1	12919	Unique	Used	2.07369	2	1398.63	2796.25	4.68205	44.6661	3812	3812	MS2	19/40	Plasma_iTRAQ_7.raw
																gi153266841	aTFGcHDGYSLDGPEEIEcTk	1	1	HCD	N-Term(iTRAQ4plex), C5(Methylthio), C19(Methylthio), K21(iTRAQ4plex)	136.945	4.82391	1	1	11878	Unique	Used	1.75777	2	1326.57	2652.14	2.08738	60.767	3996	3996	MS2	23/40	Plasma_iTRAQ_4_6.raw
																gi153266841	aTFGcHDGySLDGPEEIEcTk	1	1	HCD	N-Term(iTRAQ4plex), C5(Methylthio), Y9(iTRAQ4plex), C19(Methylthio), K21(iTRAQ4plex)	76.1443	4.76478	1	1	13035	Unique	Used	1.98246	3	932.754	2796.25	4.61176	46.2918	3965	3965	MS2	24/80	Plasma_iTRAQ_7.raw
																gi153266841	aTFGcHDGYSLDGPEEIEcTk	1	1	HCD	N-Term(iTRAQ4plex), C5(Methylthio), C19(Methylthio), K21(iTRAQ4plex)	41.7888	4.20404	1	1	15785	Unique	Used	2.2014	4	663.79	2652.14	1.38684	47.1619	4217	4217	MS2	20/120	Plasma_iTRAQ_6.raw
																gi153266841	aTFGcHDGySLDGPEEIEcTk	1	1	HCD	N-Term(iTRAQ4plex), C5(Methylthio), Y9(iTRAQ4plex), C19(Methylthio), K21(iTRAQ4plex)	97.8149	3.78859	1	1	13057	Unique	Used	2.42603	2	1398.62	2796.23	-1.51697	46.525	3991	3991	MS2	17/40	Plasma_iTRAQ_7.raw
																gi153266841	aTVVYQGER	1	1	HCD	N-Term(iTRAQ4plex)	5.66137	3.64867	1	1	16018	Unique	Used	1.21323	2	583.818	1166.63	0.483178	20.9664	1309	1309	MS2	12/16	Plasma_iTRAQ_2.raw
																gi153266841	aTVVYQGER	1	1	HCD	N-Term(iTRAQ4plex)	14.3724	3.46847	1	1	10602	Unique	Used	1.08561	2	583.818	1166.63	0.483178	22.529	1383	1383	MS2	12/16	Plasma_iTRAQ_1_3.raw
																gi153266841	aTVVYQGER	1	1	HCD	N-Term(iTRAQ4plex)	13.8502	3.17446	1	1	13266	Unique	Used	1.07582	2	583.818	1166.63	-0.458538	21.4273	1313	1313	MS2	12/16	Plasma_iTRAQ_6.raw
																gi153266841	cPFPSRPDnGFVNYPAkPTLYYk	1	1	HCD	C1(Methylthio), N-Term(iTRAQ4plex), N9(Deamidated), K17(iTRAQ4plex), K23(iTRAQ4plex)	111.596	7.06644	1	1	9024	Unique	Used	1.883	3	1051.87	3153.6	2.68287	56.4233	4031	4031	MS2	27/88	Plasma_iTRAQ_8.raw
																gi153266841	cPFPSRPDnGFVNYPAkPTLYYk	1	1	HCD	C1(Methylthio), N-Term(iTRAQ4plex), N9(Deamidated), K17(iTRAQ4plex), K23(iTRAQ4plex)	96.5168	6.54673	1	1	13570	Unique	Used	1.58583	3	1051.87	3153.59	0.824877	53.1442	4649	4649	MS2	25/88	Plasma_iTRAQ_7.raw
																gi153266841	cPFPSRPDnGFVNYPAkPTLYYk	1	1	HCD	C1(Methylthio), N-Term(iTRAQ4plex), N9(Deamidated), K17(iTRAQ4plex), K23(iTRAQ4plex)	80.6182	6.04981	1	1	9087	Unique	Used	1.45735	3	1051.87	3153.59	0.708752	57.638	4126	4126	MS2	20/88	Plasma_iTRAQ_8.raw
																gi153266841	cPFPSRPDnGFVNYPAkPTLYYk	1	1	HCD	C1(Methylthio), N-Term(iTRAQ4plex), N9(Deamidated), K17(iTRAQ4plex), K23(iTRAQ4plex)	60.6658	5.05178	1	1	9095	Unique	Used	1.53278	5	631.526	3153.6	2.59693	57.8173	4139	4139	MS2	26/176	Plasma_iTRAQ_8.raw
																gi153266841	cPFPSRPDnGFVNYPAkPTLYYk	1	1	HCD	C1(Methylthio), N-Term(iTRAQ4plex), N9(Deamidated), K17(iTRAQ4plex), K23(iTRAQ4plex)	63.6189	4.60454	1	1	13562	Unique	Used	1.4487	5	631.526	3153.6	3.08078	53.0507	4639	4639	MS2	26/176	Plasma_iTRAQ_7.raw
																gi153266841	cPFPSRPDnGFVNYPAkPTLYYk	1	1	HCD	C1(Methylthio), N-Term(iTRAQ4plex), N9(Deamidated), K17(iTRAQ4plex), K23(iTRAQ4plex)	40.2247	4.3828	1	1	9033	Unique	Used	2.09712	5	631.526	3153.6	2.79047	56.5038	4041	4041	MS2	25/176	Plasma_iTRAQ_8.raw
																gi153266841	cPFPSRPDnGFVNYPAkPTLYYk	1	1	HCD	C1(Methylthio), N-Term(iTRAQ4plex), N9(Deamidated), K17(iTRAQ4plex), K23(iTRAQ4plex)	32.2472	4.2994	1	1	10814	Unique	Used	1.67989	5	631.526	3153.6	2.88724	90.2001	6541	6541	MS2	22/176	Plasma_iTRAQ_8.raw
																gi153266841	cPFPSRPDnGFVNYPAkPTLYYk	1	1	HCD	C1(Methylthio), N-Term(iTRAQ4plex), N9(Deamidated), K17(iTRAQ4plex), K23(iTRAQ4plex)	56.1393	3.62167	1	1	9037	Unique	Used	2.00174	2	1577.31	3153.61	5.22251	56.5686	4047	4047	MS2	14/44	Plasma_iTRAQ_8.raw
																gi153266841	cSYTEDAQcIDGTIEVPk	1	1	HCD	N-Term(iTRAQ4plex), C1(Methylthio), C9(Methylthio), K18(iTRAQ4plex)	89.3678	5.81921	1	1	20063	Unique	Used	2.15882	3	784.688	2352.05	1.46295	57.5082	5695	5695	MS2	24/68	Plasma_iTRAQ_2.raw
																gi153266841	cSYTEDAQcIDGTIEVPk	1	1	HCD	N-Term(iTRAQ4plex), C1(Methylthio), C9(Methylthio), K18(iTRAQ4plex)	90.6984	5.50968	1	1	17021	Unique	Used	2.00457	3	784.688	2352.05	1.30725	62.5992	5860	5860	MS2	23/68	Plasma_iTRAQ_4.raw
																gi153266841	cSyTEDAQcIDGTIEVPk	1	1	HCD	N-Term(iTRAQ4plex), C1(Methylthio), Y3(iTRAQ4plex), C9(Methylthio), K18(iTRAQ4plex)	66.5699	5.33035	1	1	15838	Unique	Used	1.47934	3	832.724	2496.16	3.54979	47.6942	4278	4278	MS2	24/68	Plasma_iTRAQ_6.raw
																gi153266841	cSYTEDAqcIDGTIEVPk	1	1	HCD	N-Term(iTRAQ4plex), C1(Methylthio), Q8(Deamidated), C9(Methylthio), K18(iTRAQ4plex)	91.1362	5.26409	1	1	16642	Unique	Used	2.33188	2	1177.03	2353.06	11.3995	56.3612	5227	5227	MS2	18/34	Plasma_iTRAQ_6.raw
																gi153266841	cSYTEDAQcIDGTIEVPk	1	1	HCD	N-Term(iTRAQ4plex), C1(Methylthio), C9(Methylthio), K18(iTRAQ4plex)	100.496	5.08189	1	1	20065	Unique	Used	2.89543	2	1176.53	2352.05	0.560423	57.5193	5697	5697	MS2	18/34	Plasma_iTRAQ_2.raw
																gi153266841	cSYTEDAQcIDGTIEVPk	1	1	HCD	N-Term(iTRAQ4plex), C1(Methylthio), C9(Methylthio), K18(iTRAQ4plex)	65.3623	4.98727	1	1	21316	Unique	Used	1.47323	3	784.689	2352.05	2.08574	69.6156	7071	7071	MS2	19/68	Plasma_iTRAQ_2.raw
																gi153266841	cSYTEDAQcIDGTIEVPk	1	1	HCD	N-Term(iTRAQ4plex), C1(Methylthio), C9(Methylthio), K18(iTRAQ4plex)	49.8924	4.9374	1	1	13274	Unique	Used	1.68473	3	784.687	2352.05	-0.327587	64.1916	4298	4298	MS2	18/68	Plasma_iTRAQ_1_3.raw
																gi153266841	cSYTEDAQcIDGTIEVPk	1	1	HCD	N-Term(iTRAQ4plex), C1(Methylthio), C9(Methylthio), K18(iTRAQ4plex)	83.9593	4.92543	1	1	19319	Unique	Used	1.68422	3	784.689	2352.05	2.55283	50.9759	4892	4892	MS2	14/68	Plasma_iTRAQ_2.raw
																gi153266841	cSYTEDAQcIDGTIEVPk	1	1	HCD	N-Term(iTRAQ4plex), C1(Methylthio), C9(Methylthio), K18(iTRAQ4plex)	106.524	4.89585	1	1	16644	Unique	Used	2.1838	2	1176.53	2352.04	-1.61936	56.3966	5230	5230	MS2	18/34	Plasma_iTRAQ_6.raw
																gi153266841	cSYTEDAQcIDGTIEVPk	1	1	HCD	N-Term(iTRAQ4plex), C1(Methylthio), C9(Methylthio), K18(iTRAQ4plex)	47.4993	4.83706	1	1	17141	Unique	Used	2.37471	3	784.688	2352.05	0.918003	64.1661	5995	5995	MS2	16/68	Plasma_iTRAQ_4.raw
																gi153266841	cSYTEDAQcIDGTIEVPk	1	1	HCD	N-Term(iTRAQ4plex), C1(Methylthio), C9(Methylthio), K18(iTRAQ4plex)	82.8524	4.744	1	1	19879	Unique	Used	2.21542	2	1176.53	2352.05	0.352825	55.7844	5495	5495	MS2	18/34	Plasma_iTRAQ_2.raw
																gi153266841	cSyTEDAQcIDGTIEVPk	1	1	HCD	N-Term(iTRAQ4plex), C1(Methylthio), Y3(iTRAQ4plex), C9(Methylthio), K18(iTRAQ4plex)	26.9616	4.73113	1	1	12701	Unique	Used	2.05756	3	832.722	2496.15	0.39553	73.6634	4935	4935	MS2	17/68	Plasma_iTRAQ_4_6.raw
																gi153266841	cSYTEDAQcIDGTIEVPk	1	1	HCD	N-Term(iTRAQ4plex), C1(Methylthio), C9(Methylthio), K18(iTRAQ4plex)	99.2887	4.70543	1	1	20162	Unique	Used	2.07277	3	784.688	2352.05	1.15155	58.3729	5802	5802	MS2	22/68	Plasma_iTRAQ_2.raw
																gi153266841	cSYTEDAQcIDGTIEVPk	1	1	HCD	N-Term(iTRAQ4plex), C1(Methylthio), C9(Methylthio), K18(iTRAQ4plex)	68.4341	4.69499	1	1	21810	Unique	Used	1.79778	3	784.689	2352.05	2.70853	74.6529	7618	7618	MS2	21/68	Plasma_iTRAQ_2.raw
																gi153266841	cSYTEDAQcIDGTIEVPk	1	1	HCD	N-Term(iTRAQ4plex), C1(Methylthio), C9(Methylthio), K18(iTRAQ4plex)	79.3748	4.58051	1	1	20163	Unique	Used	2.76193	2	1176.53	2352.05	-0.685167	58.3759	5803	5803	MS2	18/34	Plasma_iTRAQ_2.raw
																gi153266841	cSYTEDAQcIDGTIEVPk	1	1	HCD	N-Term(iTRAQ4plex), C1(Methylthio), C9(Methylthio), K18(iTRAQ4plex)	105.084	4.50072	1	1	13317	Unique	Used	2.66671	2	1176.53	2352.05	0.664222	64.8704	4345	4345	MS2	19/34	Plasma_iTRAQ_1_3.raw
																gi153266841	cSYTEDAQcIDGTIEVPk	1	1	HCD	N-Term(iTRAQ4plex), C1(Methylthio), C9(Methylthio), K18(iTRAQ4plex)	85.595	4.48668	1	1	20845	Unique	Used	2.69208	2	1176.53	2352.05	1.18322	64.8328	6548	6548	MS2	19/34	Plasma_iTRAQ_2.raw
																gi153266841	cSyTEDAQcIDGTIEVPk	1	1	HCD	N-Term(iTRAQ4plex), C1(Methylthio), Y3(iTRAQ4plex), C9(Methylthio), K18(iTRAQ4plex)	81.7337	4.47174	1	1	15847	Unique	Used	2.5873	2	1248.58	2496.15	1.89247	47.7955	4289	4289	MS2	17/34	Plasma_iTRAQ_6.raw
																gi153266841	cSYTEDAQcIDGTIEVPk	1	1	HCD	N-Term(iTRAQ4plex), C1(Methylthio), C9(Methylthio), K18(iTRAQ4plex)	100.471	4.4623	1	1	20663	Unique	Used	2.45713	2	1176.53	2352.04	-1.30796	63.0859	6348	6348	MS2	18/34	Plasma_iTRAQ_2.raw
																gi153266841	cSYTEDAQcIDGTIEVPk	1	1	HCD	N-Term(iTRAQ4plex), C1(Methylthio), C9(Methylthio), K18(iTRAQ4plex)	71.7638	4.37525	1	1	12038	Unique	Used	1.68824	3	784.689	2352.05	1.85219	45.0211	2952	2952	MS2	21/68	Plasma_iTRAQ_1_3.raw
																gi153266841	cSYTEDAQcIDGTIEVPk	1	1	HCD	N-Term(iTRAQ4plex), C1(Methylthio), C9(Methylthio), K18(iTRAQ4plex)	37.2842	4.37277	1	1	17612	Unique	Used	1.37322	3	784.689	2352.05	2.31929	70.5455	6534	6534	MS2	17/68	Plasma_iTRAQ_4.raw
																gi153266841	cSYTEDAQcIDGTIEVPk	1	1	HCD	N-Term(iTRAQ4plex), C1(Methylthio), C9(Methylthio), K18(iTRAQ4plex)	73.9242	4.35539	1	1	20742	Unique	Used	1.41571	3	784.688	2352.05	0.606606	63.894	6437	6437	MS2	18/68	Plasma_iTRAQ_2.raw
																gi153266841	cSYTEDAQcIDGTIEVPk	1	1	HCD	N-Term(iTRAQ4plex), C1(Methylthio), C9(Methylthio), K18(iTRAQ4plex)	88.0583	4.29618	1	1	20484	Unique	Used	2.21207	2	1176.53	2352.05	0.87182	61.4283	6155	6155	MS2	18/34	Plasma_iTRAQ_2.raw
																gi153266841	cSYTEDAQcIDGTIEVPk	1	1	HCD	N-Term(iTRAQ4plex), C1(Methylthio), C9(Methylthio), K18(iTRAQ4plex)	94.5386	4.2638	1	1	17025	Unique	Used	2.35017	2	1176.53	2352.05	-0.685167	62.6303	5864	5864	MS2	18/34	Plasma_iTRAQ_4.raw
																gi153266841	cSYTEDAQcIDGTIEVPk	1	1	HCD	N-Term(iTRAQ4plex), C1(Methylthio), C9(Methylthio), K18(iTRAQ4plex)	74.3388	4.24573	1	1	20387	Unique	Used	2.09619	2	1176.53	2352.05	1.18322	60.5289	6050	6050	MS2	17/34	Plasma_iTRAQ_2.raw
																gi153266841	cSYTEDAQcIDGTIEVPk	1	1	HCD	N-Term(iTRAQ4plex), C1(Methylthio), C9(Methylthio), K18(iTRAQ4plex)	51.0685	4.12526	1	1	12612	Unique	Used	1.39516	3	784.689	2352.05	2.00789	72.3779	4836	4836	MS2	15/68	Plasma_iTRAQ_4_6.raw
																gi153266841	cSYTEDAQcIDGTIEVPk	1	1	HCD	N-Term(iTRAQ4plex), C1(Methylthio), C9(Methylthio), K18(iTRAQ4plex)	95.0352	4.02898	1	1	20283	Unique	Used	2.2299	3	784.689	2352.05	1.85219	59.4612	5934	5934	MS2	20/68	Plasma_iTRAQ_2.raw
																gi153266841	cSYTEDAQcIDGTIEVPk	1	1	HCD	N-Term(iTRAQ4plex), C1(Methylthio), C9(Methylthio), K18(iTRAQ4plex)	58.4068	3.96077	1	1	20641	Unique	Used	2.19719	3	784.69	2352.05	3.25348	62.9186	6325	6325	MS2	20/68	Plasma_iTRAQ_2.raw
																gi153266841	cSYTEDAQcIDGTIEVPk	1	1	HCD	N-Term(iTRAQ4plex), C1(Methylthio), C9(Methylthio), K18(iTRAQ4plex)	43.7728	3.88372	1	1	11900	Unique	Used	1.81346	3	784.687	2352.05	-0.171888	42.8491	2800	2800	MS2	19/68	Plasma_iTRAQ_1_3.raw
																gi153266841	cSYTEDAQcIDGTIEVPk	1	1	HCD	N-Term(iTRAQ4plex), C1(Methylthio), C9(Methylthio), K18(iTRAQ4plex)	72.9826	3.84511	1	1	20266	Unique	Used	2.41779	2	1176.53	2352.05	-0.26997	59.3229	5916	5916	MS2	18/34	Plasma_iTRAQ_2.raw
																gi153266841	cSYTEDAQcIDGTIEVPk	1	1	HCD	N-Term(iTRAQ4plex), C1(Methylthio), C9(Methylthio), K18(iTRAQ4plex)	62.4905	3.8206	1	1	12125	Unique	Used	1.29289	3	784.69	2352.06	3.48702	46.4171	3049	3049	MS2	19/68	Plasma_iTRAQ_1_3.raw
																gi153266841	cSYTEDAQcIDGTIEVPk	1	1	HCD	N-Term(iTRAQ4plex), C1(Methylthio), C9(Methylthio), K18(iTRAQ4plex)	49.1297	3.74779	1	1	21727	Unique	Used	1.12603	3	784.689	2352.05	2.08574	73.6809	7523	7523	MS2	17/68	Plasma_iTRAQ_2.raw
																gi153266841	cSYTEDAQcIDGTIEVPk	1	1	HCD	N-Term(iTRAQ4plex), C1(Methylthio), C9(Methylthio), K18(iTRAQ4plex)	72.4715	3.73142	1	1	12239	Unique	Used	1.34599	3	784.688	2352.05	1.3851	48.2365	3174	3174	MS2	18/68	Plasma_iTRAQ_1_3.raw
																gi153266841	cSYTEDAQcIDGTIEVPk	1	1	HCD	N-Term(iTRAQ4plex), C1(Methylthio), C9(Methylthio), K18(iTRAQ4plex)	62.3509	3.7084	1	1	20394	Unique	Used	1.46043	3	784.688	2352.05	1.46295	60.6101	6058	6058	MS2	17/68	Plasma_iTRAQ_2.raw
																gi153266841	cSYTEDAQcIDGTIEVPk	1	1	HCD	N-Term(iTRAQ4plex), C1(Methylthio), C9(Methylthio), K18(iTRAQ4plex)	49.5443	3.65787	1	1	21483	Unique	Used	1.50359	3	784.688	2352.05	0.840154	71.2175	7253	7253	MS2	17/68	Plasma_iTRAQ_2.raw
[truncated: 10,423 more rows]
